# Supplementary material for: CircRNA MBOAT2 promotes intrahepatic cholangiocarcinoma progression and lipid metabolism reprogramming by stabilizing PTBP1 to facilitate FASN mRNA cytoplasmic export
Source: Cell Death Dis. 2023 Jan 12;14(1):20. doi: 10.1038/s41419-022-05540-y (PMC9837196; doi:10.1038/s41419-022-05540-y)
Supplement: Supplementary file 4 — Supplementary Table 2. The proteins pulled down by the circMBOAT2 probe. [file 41419_2022_5540_MOESM4_ESM.xlsx]

## Sheet: Value_table
gene_name	Unique_Peptide_Num_antisense	Unique_Peptide_Num_sense	iBAQ_antisense	iBAQ_sense
PRKDC	1	7	2.04155	4.31856
FH	1	3	42.8695	23.086
RPL12	1	1	55.6276	32.9349
MT-CO2	1	1	100.741	24.3274
PSMA6	1	4	25.1769	162.775
DCD	2	1	374.85	197.308
FASN	1	11	3.84689	18.5672
CLPX	1		10.8553
MAP1B	1	1	7.37291	0.444697
DDX5	2	3	32.7395	13.8181
VCP	4	14	93.7733	139.812
RPS7	1	1	40.4846	0.849518
DBN1	1	6	31.3424	90.4207
HDLBP	1		6.07277
NPEPPS	1	8	12.4588	25.4546
CCT5	1	1	22.9627	3.13513
ASNA1	1		29.0798
DLD	2	1	27.6625	1.93419
RPS16	2	1	142.785	15.6554
XRCC5	1	7	25.1126	40.0089
UBA1	2	7	14.2377	16.8177
ANXA2	17	22	3158.24	974.356
YWHAG	2	3	165.857	78.1644
CAP1	1	6	38.0422	68.8925
HBA1	1		36.3156
AKR1B10	1	2	37.9886	22.8245
ECH1	1		43.9717
YWHAB	1	3	28.8152	33.1558
TPI1	3	6	56.0683	70.9285
RPL13A	1	1	86.9961	8.03287
XRCC6	1	7	22.3862	43.8972
YWHAE	3	8	161.914	176.187
ERP29	1	2	28.4006	11.686
SYNCRIP	4	7	110.418	52.7686
GDI1	1	2	26.8842	4.36285
TXNRD1	1	3	13.7962	11.9736
SERPINB12	3		104.43
RPL19	1		25.0717
PDIA3	8	12	312.295	96.5548
GPI	3	7	87.5847	82.2469
PRDX6	3	9	246.609	104.591
NONO	1		22.081
UBC	2	4	76.9346	42.0853
TALDO1	1	6	62.3356	119.043
CCT7	1	5	15.8912	18.4699
RPL3	1		50.7055
NCL	9	14	286.915	579.627
DHX9	13	15	156.69	67.1106
HNRNPA1L2	1	2	83.0314	36.1281
IGHG1	2	2	167.479	94.9006
ITGB1	3	7	101.226	106.858
CCT2	1	4	15.2111	19.6683
PGD	1	1	48.2441	0.526052
GOT1	2	5	96.8261	55.868
RPS6	1	2	110.704	60.9811
CANX	4	8	160.012	68.2824
KBTBD3	1		35.9691
CAPZA2	1		58.4971
HBD	2	2	149.358	50.8648
TUBA1C	4		942.172
TUBA4B	1	1	478.478	48.8503
RPL27A	1		132.212
NACA	1	2	12.2461	7.05482
EZR	5	5	162.593	26.4574
BLMH	2	1	38.4412	8.14274
RUVBL1	1	3	18.3278	18.404
GSTO1	1	4	24.806	44.8981
TGM3	1		9.66713
IARS2	1	3	33.0816	11.6311
EIF6	1		73.7214
HNRNPAB	2	1	16.646	0
TAGLN2	3	6	192.22	97.8619
PSME2	1		31.5012
PEBP1	1	2	90.7222	50.2873
ELAVL1	2	1	31.7712	9.7073
CLIC1	2	7	220.068	110.436
LMNA	7	17	156.87	140.751
APEX1	2	2	75.1384	25.4773
RPSA	1	4	71.7212	130.65
HSPA4	1	9	16.5339	31.4007
CORO1C	1		19.5219
AKR1C3	1	2	62.9393	48.6304
SLC25A3	2	5	110.521	66.3703
CFL1	2	6	15.2442	328.146
RPL7A	2	1	62.4989	39.7042
ACTC1	1	1	882.596	66.3255
DDX39A	1	2	46.9436	24.9328
ACTB	4		3205.62
CCT8	3	9	86.7681	82.1736
GAPDH	5	9	508.437	237.234
EEF1D	3	6	120.287	113.784
SHROOM3	1		0.113629
DDX21	1	4	8.5329	22.7645
NSUN2	1	1	18.6396	2.27556
VDAC2	1	4	95.6911	84.0633
PA2G4	1	3	17.7735	43.9303
DDB1	3	4	51.7421	17.4418
SSBP1	2	2	90.9685	49.5987
RPL26L1	1	2	140.345	110.98
ATP5F1A	5	13	249.682	165.883
CKM	1	1	101.785	6.25934
MYL12B	1	3	62.6183	63.4234
OLA1	1	1	13.9981	4.43709
ANXA1	7	14	856.551	267.567
KRT10	21	28	8955.19	5287.02
KRT16	4	6	70.9736	132.115
KRT14	2	8	64.2034	113.361
KRT18	7	6	271.504	198.536
KRT17	1	2	10.2652	16.2161
KRT19	1	2	275.457	19.9761
PRDX1	5	5	606.137	423.687
CASP14	2	1	54.9967	7.80871
ACTN1	1	6	14.235	33.4529
ACTN4	8	14	117.97	49.8664
KRT78	1	1	14.1328	7.55111
SHTN1	1		18.517
YWHAQ	2	3	49.4689	12.3944
YWHAZ	3	5	233.171	122.882
PPP2R1A	1	4	37.5285	28.7088
SFPQ	1	1	2.60951	1.63722
H1-3	3	2	796.151	192.84
ARHGDIA	1	2	116.107	39.121
ARF3	1	5	96.8939	122.126
PSAT1	2	3	52.7992	28.0226
PPIA	3	6	751.031	145.519
GLRX3	1	1	25.192	8.7528
NME8	1		26.2756
BCAP31	1	2	62.5619	47.5769
GGCT	1		60.6478
PUF60	2	1	29.3967	13.7803
ACAA2	2	2	46.0285	4.97148
ANXA4	3	6	115.078	85.7804
PYGB	4	14	105.35	74.5248
HSPH1	3	6	31.2593	31.318
PCBP2	1	1	30.0702	20.0679
RTN4	1	2	45.2888	26.1966
FLNA	33	70	401.74	208.142
SPTBN1	1	14	12.5612	18.4694
GSR	1	3	11.9247	56.8631
EPRS1	1	1	36.8957	5.71342
FLNB	28	45	283.396	144.776
PLEC	4	3	4.55553	2.37815
MADD	1		6.23098
HSPD1	7	11	237.341	148.478
CTTN	3	3	65.5091	38.9082
PLIN3	1		20.6991
ANXA5	2	9	193.066	174.722
TXN	2	1	161.167	18.2768
EEF1B2	2	4	140.83	95.3667
HNRNPH3	1	1	51.8864	18.2413
ILF2	1	3	41.8635	86.2594
HNRNPDL	1	1	17.3756	15.4227
RPS9	1	3	43.8493	114.005
PGK1	5	12	387.815	239.127
HSPA9	6	13	156.201	118.244
HSPA1L	1	1	11.9099	16.1125
HSPA1A	7	8	132.762	131.143
HSPA5	13	21	668.961	318.944
HSPA8	15	20	697.826	375.309
G6PD	4	12	144.891	93.5731
HNRNPH1	1	1	3.99827	5.01199
AHNAK	2	26	2.11922	55.8864
ATIC	2	4	37.2663	20.4364
RPL14	1	1	78.2863	9.79109
SPTAN1	6	19	71.01	27.0849
HNRNPF	1	2	5.5344	39.5999
RPL7	3	6	233.725	155.87
MYH9	14	47	230.911	97.9617
GDI2	4	5	162.372	35.7134
FBXL4	1		10.0147
POM121L2	1		23.1472
AIMP1	1		18.7622
ALDH2	2	1	93.8372	14.0982
GLUD1	2	6	33.3671	61.4228
RPS18	2	2	77.0285	32.9682
PHGDH	2	7	86.1945	74.2891
H3C1	1	1	416.177	21.2615
PLS1	1		21.916
CDSN	1		59.503
RAB15	1	1	84.3546	19.6602
GSN	1	4	31.8582	21.9815
NIBAN2	1	6	30.3721	37.0979
ALDOA	3	8	193.54	283.4
LDHA	5	8	456.777	213.937
GOT2	2	1	52.0498	8.93214
TRA2B	1		146.943
SET	2	3	400.116	94.0607
EEF1A1	4	8	853.982	227.393
VIM	18	24	1631.45	1029.9
KRT2	20	22	1562.7	1545.58
HNRNPC	1	3	24.0747	99.6707
ATP8A2	1		25.9549
DSP	2	5	5.32616	3.8542
WDR1	3	8	50.8259	126.746
KRT72	1		16.6918
KRT77	3	1	100.937	2.65382
KRT7	6	4	309.528	83.2854
KRT6A	2	2	36.3136	39.5488
KRT6B	3		90.178
KRT8	10	10	442.913	185.37
KRT5	9	11	308.243	307.401
DSG1	2	2	28.5524	15.9435
IGKV2D-26	2	2	4567.76	4410.82
LACTB2	1	1	27.8495	7.01696
EIF2S1	1		16.4065
HNRNPA2B1	3	4	175.38	185.273
GANAB	2	7	31.7592	23.4455
KHSRP	2	6	38.8416	51.3145
RAB11A	1	1	45.5368	6.30585
SYPL1	1		51.919
FLG2	1		0.987153
SHMT1	1		18.3239
VCL	15	28	192.786	143.712
TKT	7	12	354.51	420.472
PRMT1	2	2	109.868	31.5037
SNRPN	1		7.44025
EIF4A1	6	9	187.404	143.709
TMEM109	1	1	56.4416	26.5899
SLC25A5	1	2	47.4834	27.062
ARMC9	1		0.671098
KLHL36	1		30.6862
RPL13	1	2	82.609	50.0969
SHMT2	1	6	25.5632	56.8688
HSPB1	2	5	139.083	240.284
HNRNPM	3	1	15.5367	4.32406
LRPPRC	3	18	8.36401	50.5456
RAB2A	1	1	44.8337	19.622
PPIB	4	2	204.77	21.2175
PHB	1	7	8.83574	111.185
MCCC2	7	12	170.126	189.049
ANXA11	3	10	162.967	99.5274
ATP5F1B	3	13	155.75	130.239
KRT9	18	29	4880.95	1932.43
RTN3	1		23.322
STRAP	5	3	169.344	59.8105
CCT3	1	4	8.82691	21.0265
NPM1	1	3	6.28713	127.418
UBE2NL	1	1	14.6956	18.7451
RPS5	1	2	135.71	98.3745
PRDX3	2	4	194.997	66.7908
RPL8	1	1	38.4672	34.7685
PDIA4	1	6	11.4913	24.364
RPS4Y2	1		2.06277
TRAP1	1	4	261.317	55.5301
PRMT5	1		8.70154
H2AC4	1	1	432.6	206.574
SEPTIN2	1	2	20.5331	12.4151
SSB	1	6	1.47132	36.4734
ARPC3	1	1	86.0872	2.61374
FSCN1	2	3	41.9003	28.9074
RPL27	1	2	128.004	86.6298
H4C1	1	1	219.401	138.883
MDH2	3	7	91.2499	115.301
HNRNPD	1	3	121.484	79.9661
PDIA6	2	6	62.684	34.7995
PHB2	1	5	24.4414	30.0933
RPL4	3	2	131.837	22.0882
DPYSL2	3	11	124.749	102.165
SERPINB1	1	2	37.0215	11.1588
CLTC	11	27	115.078	90.1182
H2BC12	1	3	1.02785	172.157
HRNR	4		3.55263
RPS14	1	1	122.538	33.0462
DAZAP1	1		9.65688
RPS3	3	7	192.653	126.066
DIRAS2	1	1	114.618	120.865
HNRNPU	5	6	75.0233	64.1086
TUBB	9	3	1131.89	72.5262
RPL18	1	3	108.078	96.2959
EEF1G	4	6	238.769	58.3766
CALR	1	5	80.7038	64.2134
DARS1	1	4	9.44731	23.8104
HNRNPUL1	1		15.5864
ARPC4	1	4	48.9552	94.5754
TPM1	4	3	269.561	39.863
CTSD	3	5	206.245	94.935
NME2	1		23.9028
EEF2	13	23	360.601	178.672
SERPINH1	3	7	130.812	69.7387
ILF3	1	3	12.8694	43.7143
NAP1L1	1	2	74.6072	21.683
MAP4	1	2	11.7582	15.1852
PABPC1	5	4	72.1889	53.6647
RPS2	1	5	61.6989	76.7594
TUBA4A	1	3	66.4394	25.0695
HSP90B1	6	16	155.483	122.361
RPL23A	1		117.568
HSP90AA1	8	13	522.619	184.599
HSP90AB1	7	14	678.853	181.007
HNRNPK	7	9	242.16	213.085
ANXA3	1	4	58.6127	46.5207
KRT1	24	27	6565.51	3980.2
SRSF3	1		116.194
FUS	1	1	31.1174	18.4051
RPS8	2	5	339.104	344.583
ENO1	6	9	586.025	235.586
G3BP1	1		43.6751
RPS24	1		111.965
GARS1	2	6	34.1454	37.5774
P4HB	4	12	135.954	83.8483
TARDBP	1		30.1139
PCNA	1	5	41.1211	53.4675
RPLP0	2	5	95.9789	118.188
PKM	6	24	619.515	370.265
CTNNB1	1		4.89382
SRSF1	1	2	79.5817	21.476
AKR1B1	3	4	156.792	105.739
HNRNPA3	1		15.98
ALB	8	12	351.1	213.798
KANSL3	1		0.0588875
TWF2	1	1	20.6256	15.4698
RPS25	2		166.075
PCBP1	1	1	30.9386	14.3675
USP14	1		25.0459
AHCY	2	7	120.097	69.9414
XP32	1	1	89.4284	17.3971
RACK1	3	5	147.468	97.0102
TWF1	1		15.1949
RAD23B		1		7.14307
TPP2		1		4.21124
NARS1		1		2.0687
SCFD1		1		2.82835
DDX3X		2		0.807056
APEH		1		4.53542
DIAPH1		1		1.31877
NIBAN1		1		2.59802
RPLP2		2		33.1075
AK1		1		37.1256
PSMC2		1		8.31924
SNX12		1		67.4022
NEDD4L		1		0.904377
KPNA6		1		8.27501
HEXB		1		1.02851
UGDH		8		48.5246
SDHA		1		10.5248
IDE		1		2.48608
SNX2		1		13.0785
NASP		1		5.72821
RPS26		1		6.37009
TUBB4B		3		68.3938
TUBB3		1		3.73559
LDHB		2		13.0787
APOA1		1		1.66073
SEPSECS		1		7.68428
CAPN2		4		20.2189
NUMA1		1		0.424309
GNA13		1		16.6503
WARS1		2		10.596
ACTR3		7		78.0161
IDH1		2		21.0335
CAT		1		1.3767
SUPT16H		1		1.7743
CNN3		1		29.6659
ST13P4		2		41.3654
ADK		1		7.48178
DSTN		1		13.4933
EIF2AK2		1		0.5715
CORO1B		2		33.5963
HSP90AB4P		1		8.55907
API5		1		0.650939
RANBP17		1		14.7983
DLST		2		44.8173
ALDH1A1		1		15.4702
RCN1		1		2.96072
BZW1		1		4.16576
DYNC1LI2		1		6.98601
HADHB		2		18.7033
DDX17		1		1.29508
NUDCD1		1		4.00085
TTR		3		44.3534
CCT6A		5		55.0677
NMT2		1		4.35273
OTUB1		1		25.8614
PSMB1		1		17.4121
PFN1		4		129.697
TMPO		1		4.129
SRSF4		1		0
SNRPB2		1		17.4429
CDC42BPA		1		0.191398
DEK		1		7.66803
PURA		1		12.1866
PTBP1		4		50.2117
QARS1		1		1.19297
ETF1		1		6.00878
XPNPEP3		1		51.0007
PCYOX1		1		1.00836
CNDP2		3		15.8729
PNP		3		17.3088
ASNS		1		5.75194
LAP3		3		13.5591
PACSIN2		1		5.14839
KPNB1		3		7.95033
RTCB		1		9.60239
EIF5A2		1		15.3326
DHX15		1		0.445031
SEPTIN9		3		40.2485
EIF3L		1		2.82195
LMNB2		3		19.5752
PRKCSH		1		10.3832
SEPTIN11		1		3.15372
PGAM1		3		19.7733
CD44		2		13.3897
PSMA4		1		3.56214
HADHA		3		14.3417
LARS1		3		6.38699
RBBP4		3		52.3502
MAPRE1		1		15.4434
ARHGAP1		1		23.3215
PRPF19		1		65.3268
CSDE1		1		4.13022
HARS1		1		8.58744
PGM2		1		7.75244
CPNE1		3		38.8841
EIF3J		1		8.11874
ACADVL		1		6.08344
RPL15		1		14.1463
SSR4		1		15.8337
RPS10P5		1		22.5397
PDCD6IP		3		15.7526
EIF3D		1		10.1004
ERP44		1		15.021
SLC9A3R1		1		9.78254
MSH2		1		1.53338
COPB1		1		1.95552
COTL1		1		29.8949
AP2B1		3		13.3925
EML4		9		42.5311
IARS1		4		8.57198
PDHA1		1		11.3119
ARPC2		2		26.506
CKAP4		1		3.72336
EIF3A		2		2.92323
ANXA7		1		20.1788
HNRNPUL2		1		14.1807
RPL6		4		65.8881
TUFM		5		55.9336
ETFB		2		51.1431
RANBP1		1		0
EIF3B		4		14.6696
SIMC1		1		3.84
TUBA1A		5		115.934
TES		1		12.2458
PSMC1		2		2.02898
ACTG1		8		1937.92
GSS		1		4.1964
LMAN1		1		11.2543
BAG2		1		5.55325
ACLY		3		8.51754
PRDX2		2		89.048
PRPF18		1		9.1218
CAPZB		2		48.4151
ASPH		3		23.2665
ACTR1A		1		2.03697
PRDX5		2		23.816
DYNC1H1		6		4.2344
PSMD6		1		3.04076
PPAT		1		5.4841
ACTR2		3		53.7616
PAICS		3		16.5981
DISC1		1		4.88262
ARPC1B		2		19.5189
ETFA		2		19.4357
UBA2		1		10.9607
STIP1		3		32.0428
RAN		3		186.633
ADRM1		1		3.61445
KPRP		1		2.83566
EHD1		5		46.0569
CAPNS1		2		35.252
ABCE1		1		40.5795
ATP1A1		1		3.20566
CAPN1		2		15.5167
PON2		1		14.548
VAT1		2		37.3043
TMED10		1		21.2693
SRSF2		1		6.87418
MATR3		1		4.86169
TLN1		2		1.56267
ASAP1		1		3.49848
IDH2		3		27.1333
SF3B3		3		15.7697
LGALS1		1		26.7783
RO60		1		5.21606
IQGAP1		5		13.3529
UQCRC1		1		4.82629
RDX		1		0.244592
MSN		2		5.45826
KRT32		1		9.05208
AHCYL1		2		11.6284
BAG3		1		6.78452
RPL10		1		6.85662
CS		2		14.6206
CAV1		2		78.5362
APMAP		2		19.1861
XPO1		1		0.773951
GAPDHS		1		94.2978
FARSB		1		13.4195
NAA15		1		1.50891
CACYBP		4		53.1109
PICALM		1		1.98384
SAR1B		1		12.3225
MYOF		4		4.12285
SLC25A6		1		40.0045
MAT2A		2		29.9744
TNPO1		1		7.0899
RPN1		3		19.2001
GALK1		1		5.99098
AARS1		10		35.4102
CCDC6		1		4.92095
CEP128		1		3.75625
KIF2A		1		2.29372
TPR		1		1.02913
PPP1CA		3		52.3588
GART		2		3.54165
PPA1		5		43.484
S100A9		1		15.2775
ACP1		1		24.1027
KPNA4		1		12.3509
NME1		2		87.9925
HSD17B4		1		2.93046
HSPE1		1		11.5311
GNB1		1		23.566
LONP1		2		6.17187
SLC1A5		2		23.3368
ASPM		1		1.2418
BUB3		1		12.8214
ILK		1		5.16318
NUDT5		2		26.5817
HSD17B12		1		13.212
FARP1		1		1.20315
GPD2		1		10.5602
KRT6C		2		35.7308
SH3KBP1		1		0.39203
RUVBL2		3		30.022
HLA-A		1		8.00099
TMEM43		1		15.1296
UGP2		2		5.18265
PGM1		1		9.96057
IGHA1		1		64.9754
RAB35		1		26.6771
RAB10		1		1.38796
PPL		1		0.839353
EIF3C		2		6.91183
EPHX1		1		10.3077
CALU		3		38.6326
BROX		1		3.38242
CAND1		2		5.87087
VTN		1		0.463526
CCT4		2		8.23122
NCEH1		1		7.29186
TPT1		1		8.41866
MVP		4		15.3951
SRSF7		3		112.383
SUCLG2		1		11.0732
FUBP1		1		18.493
NSFL1C		2		26.3653
MCCC1		5		28.3671
EIF3H		1		23.7597
SULT1A1		1		7.75845
IGKC		1		11.8107
GSPT1		2		12.5394
NBAS		1		2.66128
SNRNP200		1		0.498494
DNM2		2		17.9499
HSPA4L		1		0
TPM4		1		14.6532
TPM3		2		18.1404
ANP32A		1		79.8386
ANP32B		1		10.4741
ANP32E		1		37.089
ATP2A2		5		10.5709
ATP5F1C		1		26.9462
TXNDC5		1		15.7283
SARS1		1		7.66965
IMPDH2		3		16.0613
CBR1		2		30.9625
FAM49B		2		73.5757
ALDH9A1		1		3.70713
ITGB4		2		2.31979
TARS1		3		8.23699
VPS35		1		11.223
HADH		1		11.0519
RAB14		1		6.0519
HSPBP1		1		6.62615
LAMP2		1		8.16369
CD63		1		17.5893
RPL31		1		178.634
ITGAV		1		2.8565
GFM2		1		2.88265
TFAP2D		1		33.8765
AZGP1		1		12.0402
SERPINB6		2		26.5909
FKBP10		1		5.15549
SERPINA1		3		29.7906
ESD		2		46.218
MCM6		1		4.36367
RPL35A		1		29.9429
LRRFIP1		1		9.88342
MDH1		2		53.7242
JUP		5		18.3076
HMGB1P1		2		52.6281
ECI1		1		11.0108
PPA2		2		14.7653
HDAC1		1		4.98926
SCRN1		2		13.0899
AK2		2		17.0619
PSMC5		1		6.97538
TCP1		2		9.99102
PSMA5		2		67.3484
ZYX		1		0.697051
VDAC3		1		7.92838
GLOD4		1		36.4971
VDAC1		3		54.3961
COPA		2		6.90582
PSMD11		2		11.2629
PGLS		1		44.5052
PCK2		1		4.20457
APRT		1		43.881
LASP1		2		42.561
PSMD2		1		1.39218
UBE2V1		2		55.4298
RPL11		1		69.512
DPY19L2		1		0.23943
DECR1		3		28.2625
RPS3A		3		35.8874
ALDH18A1		1		4.88345
FDPS		1		24.3752
YWHAH		2		239.273
KIF27		1		9.23355
MYL6		1		11.2947
PSMA1		1		21.1005
ARL6IP5		1		2.74759
NPLOC4		1		0.778557
CDC37		1		11.2884
PSMD3		4		57.292
RPN2		2		11.1859
RNH1		2		12.4801
PLS3		5		10.6261
LTA4H		2		10.0835
MTHFD1		1		3.71859
RPS4X		4		111.851
PGRMC1		1		50.3268
GNPTAB		1		2.92086
LAMP1		1		37.3256
ACACA		1		0
RARS1		2		7.44019
CNTNAP4		1		8.47766
NOP56		1		13.0348
PSME1		5		61
ENO3		1		8.20859
CSE1L		4		8.12683
PSMD1		2		4.17453
PFKP		3		16.0428
EIF4G1		1		0.663568
CUL4A		1		0.131572
CTNNA1		2		10.1864
ADH5		1		7.30036
FLII		2		1.85158
RPL22		1		24.7214
TRIM28		1		7.70108
ITGA3		2		12.0511
SOD1		1		10.0577
YBX2		1		3.21516
VARS1		3		9.25
VASP		1		2.81034
IPO7		3		4.91136
NHLRC2		1		1.64216
THEGL		1		11.5531
HDGF		2		20.8053
GNS		2		16.9025
EIF4H		1		6.19268
AP2A1		1		2.65497
YARS1		5		19.8716
RNPEP		2		7.74669
C1QBP		2		8.24159
ACO2		4		17.5293
DNAJB11		1		8.64493
MCM2		2		7.86144
IPO5		1		0.130298
NT5E		1		1.63844
PARK7		1		11.4967

## Sheet: Full_table
Protein_ID_1_antisense	Group_ID_antisense	Protein_ID_3_antisense	Protein_Qscore_antisense	Protein_FDR_antisense	Protein_Mass_antisense	PeptideSeqs_antisense	PepIsUnique_antisense	Unique_Peptide_Num_antisense	Unique_Spectra_Num_antisense	Coverage_antisense	Peptide_Query_antisense	Sameset_antisense	Description_antisense	Abundance_antisense	iBAQ_antisense	gene_name	Protein_ID_1_sense	Group_ID_sense	Protein_ID_3_sense	Protein_Qscore_sense	Protein_FDR_sense	Protein_Mass_sense	PeptideSeqs_sense	PepIsUnique_sense	Unique_Peptide_Num_sense	Unique_Spectra_Num_sense	Coverage_sense	Peptide_Query_sense	Sameset_sense	Description_sense	Abundance_sense	iBAQ_sense
sp|P78527|PRKDC_HUMAN	206_1	sp|P78527|PRKDC_HUMAN	2.62098	NA	468788	DQNILLGTTYR	1	1	1	0.0027	15172	-	DNA-dependent protein kinase catalytic subunit OS=Homo sapiens OX=9606 GN=PRKDC PE=1 SV=3	500.18	2.04155	PRKDC	sp|P78527|PRKDC_HUMAN	409_1	sp|P78527|PRKDC_HUMAN	21.9244	NA	468788	ATQQQHDFTLTQTADGR;DQNILLGTTYR;DVDFMYVELIQR;FVPLLPGNR;LNESTFDTQITK;NILEESLCELVAK;YFEGVSPK	1;1;1;1;1;1;1	7	7	0.0199	15661;16067;21262;7287;18657;21108;4868	-	DNA-dependent protein kinase catalytic subunit OS=Homo sapiens OX=9606 GN=PRKDC PE=1 SV=3	1058.05	4.31856
sp|P07954|FUMH_HUMAN	43_1	sp|P07954|FUMH_HUMAN	2.39178	NA	54602.2	AIEMLGGELGSK	1	1	1	0.0235	13005	-	Fumarate hydratase, mitochondrial OS=Homo sapiens OX=9606 GN=FH PE=1 SV=3	1371.83	42.8695	FH	sp|P07954|FUMH_HUMAN	75_1	sp|P07954|FUMH_HUMAN	11.5329	NA	54602.2	AIEMLGGELGSK;ETAIELGYLTAEQFDEWVKPK;IEYDTFGELK	1;1;1	3	3	0.0843	13254;27675;13566	-	Fumarate hydratase, mitochondrial OS=Homo sapiens OX=9606 GN=FH PE=1 SV=3	738.751	23.086
sp|P30050|RL12_HUMAN	256_1	sp|P30050|RL12_HUMAN	4.07786	NA	17807.5	IGPLGLSPK	1	1	1	0.0545	3837	-	60S ribosomal protein L12 OS=Homo sapiens OX=9606 GN=RPL12 PE=1 SV=1	611.904	55.6276	RPL12	sp|P30050|RL12_HUMAN	510_1	sp|P30050|RL12_HUMAN	2.9996	NA	17807.5	IGPLGLSPK	1	1	2	0.0545	3729;3728	-	60S ribosomal protein L12 OS=Homo sapiens OX=9606 GN=RPL12 PE=1 SV=1	362.284	32.9349
sp|P00403|COX2_HUMAN	126_1	sp|P00403|COX2_HUMAN	4.07786	NA	25548.2	VVLPIEAPIR	1	1	1	0.0441	10128	-	Cytochrome c oxidase subunit 2 OS=Homo sapiens OX=9606 GN=MT-CO2 PE=1 SV=1	604.447	100.741	MT-CO2	sp|P00403|COX2_HUMAN	243_1	sp|P00403|COX2_HUMAN	4.42758	NA	25548.2	VVLPIEAPIR	1	1	1	0.0441	10166	-	Cytochrome c oxidase subunit 2 OS=Homo sapiens OX=9606 GN=MT-CO2 PE=1 SV=1	145.964	24.3274
sp|P60900|PSA6_HUMAN	98_1	sp|P60900|PSA6_HUMAN	3.03647	NA	27381.8	AINQGGLTSVAVR	1	1	1	0.0528	15009	-	Proteasome subunit alpha type-6 OS=Homo sapiens OX=9606 GN=PSMA6 PE=1 SV=1	327.3	25.1769	PSMA6	sp|P60900|PSA6_HUMAN	188_1	sp|P60900|PSA6_HUMAN	15.3444	NA	27381.8	AINQGGLTSVAVR;LLDSSTVTHLFK;LYQVEYAFK;QTESTSFLEK	1;1;1;1	4	4	0.1789	15825;17874;11865;12102	-	Proteasome subunit alpha type-6 OS=Homo sapiens OX=9606 GN=PSMA6 PE=1 SV=1	2116.08	162.775
sp|P81605|DCD_HUMAN	269_1	sp|P81605|DCD_HUMAN	8.15573	NA	11276.8	DAVEDLESVGK;ENAGEDPGLAR	1;1	2	5	0.2	11717;10763;10764;10765;10767	-	Dermcidin OS=Homo sapiens OX=9606 GN=DCD PE=1 SV=2	2998.8	374.85	DCD	sp|P81605|DCD_HUMAN	543_1	sp|P81605|DCD_HUMAN	2.9996	NA	11276.8	DAVEDLESVGK	1	1	1	0.1	11882	-	Dermcidin OS=Homo sapiens OX=9606 GN=DCD PE=1 SV=2	1578.46	197.308
sp|P49327|FAS_HUMAN	104_1	sp|P49327|FAS_HUMAN	2.62098	NA	273254	TGTVSLEVR	1	1	1	0.0036	5986	-	Fatty acid synthase OS=Homo sapiens OX=9606 GN=FASN PE=1 SV=3	511.636	3.84689	FASN	sp|P49327|FAS_HUMAN	198_1	sp|P49327|FAS_HUMAN	40.7956	NA	273254	AGLYGLPR;EQGVTFPSGDIQEQLIR;GTPLISPLIK;LPEDPLLSGLLDSPALK;RPTPQDSPIFLPVDDTSFR;TGTVSLEVR;VGDPQELNGITR;VLEALLPLK;VVVQVLAEEPEAVLK;VYQWDDPDPR;WTSQDSLLGMEFSGR	1;1;1;1;1;1;1;1;1;1;1	11	11	0.0562	2871;25528;8074;24428;26968;5832;16212;6837;22773;15942;23826	-	Fatty acid synthase OS=Homo sapiens OX=9606 GN=FASN PE=1 SV=3	2469.44	18.5672
sp|O76031|CLPX_HUMAN	28_1	sp|O76031|CLPX_HUMAN	3.03647	NA	69180.7	SNILLLGPTGSGK	1	1	1	0.0205	14344	-	ATP-dependent Clp protease ATP-binding subunit clpX-like, mitochondrial OS=Homo sapiens OX=9606 GN=CLPX PE=1 SV=2	477.632	10.8553	CLPX
sp|P46821|MAP1B_HUMAN	212_1	sp|P46821|MAP1B_HUMAN	4.07786	NA	270468	LEMYVLNPVK	1	1	1	0.0041	13038	-	Microtubule-associated protein 1B OS=Homo sapiens OX=9606 GN=MAP1B PE=1 SV=2	833.139	7.37291	MAP1B	sp|P46821|MAP1B_HUMAN	413_1	sp|P46821|MAP1B_HUMAN	4.42758	NA	270468	TPEDGDYSYEIIEK	1	1	1	0.0057	23232	-	Microtubule-associated protein 1B OS=Homo sapiens OX=9606 GN=MAP1B PE=1 SV=2	50.2507	0.444697
sp|P17844|DDX5_HUMAN	156_1	sp|P17844|DDX5_HUMAN	7.11433	NA	69104.7	MLDMGFEPQIR;QVSDLISVLR	1;1	2	2	0.0342	16022;10816	-	Probable ATP-dependent RNA helicase DDX5 OS=Homo sapiens OX=9606 GN=DDX5 PE=1 SV=1	1145.88	32.7395	DDX5	sp|P17844|DDX5_HUMAN	529_1	sp|P17844|DDX5_HUMAN	9.78302	NA	69104.7	DWVLNEFK;LLQLVEDR;QVSDLISVLR	1;1;1	3	3	0.0423	8441;6517;10907	-	Probable ATP-dependent RNA helicase DDX5 OS=Homo sapiens OX=9606 GN=DDX5 PE=1 SV=1	483.635	13.8181
sp|P55072|TERA_HUMAN	195_1	sp|P55072|TERA_HUMAN	14.2287	NA	89265.7	ESIESEIR;LDQLIYIPLPDEK;MDELQLFR;WALSQSNPSALR	1;1;1;1	4	4	0.0509	6005;18811;8545;15899	-	Transitional endoplasmic reticulum ATPase OS=Homo sapiens OX=9606 GN=VCP PE=1 SV=4	4219.8	93.7733	VCP	sp|P55072|TERA_HUMAN	388_1	sp|P55072|TERA_HUMAN	49.7659	NA	89265.7	AIANECQANFISIK;DVDLEFLAK;EDEEESLNEVGYDDIGGCR;ELQELVQYPVEHPDK;EMVELPLR;ETVVEVPQVTWEDIGGLEDVK;EVDIGIPDATGR;GDDLSTAILK;GDIFLVR;GILLYGPPGTGK;GVLFYGPPGCGK;LGDVISIQPCPDVK;MDELQLFR;WALSQSNPSALR	1;1;1;1;1;1;1;1;1;1;1;1;1;1	14	15	0.2146	22135;8416;26950;24815;6541;27432;14436;7900;2214;12228;14762;21522;8471;8470;17075	-	Transitional endoplasmic reticulum ATPase OS=Homo sapiens OX=9606 GN=VCP PE=1 SV=4	6291.53	139.812
sp|P62081|RS7_HUMAN	244_1	sp|P62081|RS7_HUMAN	3.03647	NA	22113.3	HVVFIAQR	1	1	1	0.0412	6203	-	40S ribosomal protein S7 OS=Homo sapiens OX=9606 GN=RPS7 PE=1 SV=1	445.331	40.4846	RPS7	sp|P62081|RS7_HUMAN	484_1	sp|P62081|RS7_HUMAN	2.67772	NA	22113.3	TLTAVHDAILEDLVFPSEIVGK	1	1	1	0.1134	27487	-	40S ribosomal protein S7 OS=Homo sapiens OX=9606 GN=RPS7 PE=1 SV=1	9.3447	0.849518
sp|Q16643|DREB_HUMAN	154_1	sp|Q16643|DREB_HUMAN	3.03647	NA	71385.4	EQFWEQAK	1	1	1	0.0123	8936	-	Drebrin OS=Homo sapiens OX=9606 GN=DBN1 PE=1 SV=4	783.56	31.3424	DBN1	sp|Q16643|DREB_HUMAN	289_1	sp|Q16643|DREB_HUMAN	24.6881	NA	71385.4	EQFWEQAK;LAASGEGGLQELSGHFENQK;LELLAAYEEVIR;SESEVEEAAAIIAQRPDNPR;SPSDSSTASTPVAEQIER;YVLINWVGEDVPDAR	1;1;1;1;1;1	6	6	0.1433	8866;26419;19141;26934;25129;24132	-	Drebrin OS=Homo sapiens OX=9606 GN=DBN1 PE=1 SV=4	2260.52	90.4207
sp|Q00341|VIGLN_HUMAN	229_1	sp|Q00341|VIGLN_HUMAN	2.62098	NA	141368	DQDLITIIGK	1	1	1	0.0079	10394	-	Vigilin OS=Homo sapiens OX=9606 GN=HDLBP PE=1 SV=2	485.822	6.07277	HDLBP
sp|P55786|PSA_HUMAN	105_1	sp|P55786|PSA_HUMAN	4.07786	NA	103211	YAAVTQFEATDAR	1	1	1	0.0141	17690	sp|A6NEC2|PSAL_HUMAN	Puromycin-sensitive aminopeptidase OS=Homo sapiens OX=9606 GN=NPEPPS PE=1 SV=2	660.315	12.4588	NPEPPS	sp|P55786|PSA_HUMAN	201_1	sp|P55786|PSA_HUMAN	28.9284	NA	103211	AGIISTVEVLK;ATFDISLVVPK;DYFNVPYPLPK;IDFVGELNDK;LGLQNDLFSLAR;LSVEGFAVDK;SPVYLTVLK;YQGGFLISR	1;1;1;1;1;1;1;1	8	8	0.0903	10909;12781;17675;11487;17534;8854;7518;8119	-	Puromycin-sensitive aminopeptidase OS=Homo sapiens OX=9606 GN=NPEPPS PE=1 SV=2	1349.1	25.4546
sp|P48643|TCPE_HUMAN	1_1	sp|P48643|TCPE_HUMAN	2.39178	NA	59632.8	TSLGPNGLDK	1	1	1	0.0185	7088	-	T-complex protein 1 subunit epsilon OS=Homo sapiens OX=9606 GN=CCT5 PE=1 SV=1	872.581	22.9627	CCT5	sp|P48643|TCPE_HUMAN	1_1	sp|P48643|TCPE_HUMAN	4.42758	NA	59632.8	LDVTSVEDYK	1	1	1	0.0185	12077	-	T-complex protein 1 subunit epsilon OS=Homo sapiens OX=9606 GN=CCT5 PE=1 SV=1	119.135	3.13513
sp|O43681|ASNA_HUMAN	250_1	sp|O43681|ASNA_HUMAN	4.07786	NA	38767.4	LLNFPTIVER	1	1	1	0.0287	12914	-	ATPase ASNA1 OS=Homo sapiens OX=9606 GN=ASNA1 PE=1 SV=2	436.198	29.0798	ASNA1
sp|P09622|DLDH_HUMAN	186_1	sp|P09622|DLDH_HUMAN	6.46965	NA	54143	AAQLGFK;ADGGTQVIDTK	1;1	2	2	0.0354	581;10054	-	Dihydrolipoyl dehydrogenase, mitochondrial OS=Homo sapiens OX=9606 GN=DLD PE=1 SV=2	746.888	27.6625	DLD	sp|P09622|DLDH_HUMAN	362_1	sp|P09622|DLDH_HUMAN	4.42758	NA	54143	NLGLEELGIELDPR	1	1	2	0.0275	21960;8282	-	Dihydrolipoyl dehydrogenase, mitochondrial OS=Homo sapiens OX=9606 GN=DLD PE=1 SV=2	52.2231	1.93419
sp|P62249|RS16_HUMAN	226_1	sp|P62249|RS16_HUMAN	6.27001	NA	16435	LLEPVLLLGK;TLLVADPR	1;1	2	2	0.1233	9815;3908	-	40S ribosomal protein S16 OS=Homo sapiens OX=9606 GN=RPS16 PE=1 SV=2	1713.42	142.785	RPS16	sp|P62249|RS16_HUMAN	442_1	sp|P62249|RS16_HUMAN	4.42758	NA	16435	LLEPVLLLGK	1	1	2	0.0685	9800;9799	-	40S ribosomal protein S16 OS=Homo sapiens OX=9606 GN=RPS16 PE=1 SV=2	187.865	15.6554
sp|P13010|XRCC5_HUMAN	193_1	sp|P13010|XRCC5_HUMAN	4.07786	NA	82652.3	TDTLEDLFPTTK	1	1	1	0.0164	16811	-	X-ray repair cross-complementing protein 5 OS=Homo sapiens OX=9606 GN=XRCC5 PE=1 SV=3	1104.95	25.1126	XRCC5	sp|P13010|XRCC5_HUMAN	383_1	sp|P13010|XRCC5_HUMAN	25.5624	NA	82652.3	DQVTAQEIFQDNHEDGPTAK;EDIIQGFR;ETVYCLNDDDETEVLK;HLMLPDFDLLEDIESK;TDTLEDLFPTTK;TLFPLIEAK;TWTVVDAK	1;1;1;1;1;1;1	7	8	0.1216	27159;6270;25688;25522;18310;18311;7884;4684	-	X-ray repair cross-complementing protein 5 OS=Homo sapiens OX=9606 GN=XRCC5 PE=1 SV=3	1760.39	40.0089
sp|P22314|UBA1_HUMAN	242_1	sp|P22314|UBA1_HUMAN	8.15573	NA	117774	ALPAVQQNNLDEDLIR;KPLLESGTLGTK	1;1	2	2	0.0265	20095;14022	-	Ubiquitin-like modifier-activating enzyme 1 OS=Homo sapiens OX=9606 GN=UBA1 PE=1 SV=3	797.311	14.2377	UBA1	sp|P22314|UBA1_HUMAN	477_1	sp|P22314|UBA1_HUMAN	27.0825	NA	117774	DEFEGLFK;DNPGVVTCLDEAR;KPLLESGTLGTK;LAGTQPLEVLEAVQR;NGSEADIDEGLYSR;SLVASLAEPDFVVTDFAK;YDGQVAVFGSDLQEK	1;1;1;1;1;1;1	7	8	0.0898	6467;6466;19709;2415;22797;21230;25480;23198	-	Ubiquitin-like modifier-activating enzyme 1 OS=Homo sapiens OX=9606 GN=UBA1 PE=1 SV=3	941.794	16.8177
sp|P07355|ANXA2_HUMAN	128_1	sp|P07355|ANXA2_HUMAN	59.3585	NA	38579.8	AEDGSVIDYELIDQDAR;AYTNFDAER;DALNIETAIK;DIISDTSGDFR;ELASALK;GVDEVTIVNILTNR;LMVALAK;LSLEGDHSTPPSAYGSVK;LYDSMK;QDIAFAYQR;RAEDGSVIDYELIDQDAR;SEVDMLK;SLYYYIQQDTK;SYSPYDMLESIR;TNQELQEINR;TPAQYDASELK;WISIMTER	1;1;1;1;1;1;1;1;1;1;1;1;1;1;1;1;1	17	24	0.4956	20364;20363;9541;9540;9603;13550;13551;529;18702;780;20190;20191;956;10272;20669;2249;2248;17423;17422;17880;14029;14028;13507;8087	-	Annexin A2 OS=Homo sapiens OX=9606 GN=ANXA2 PE=1 SV=2	75797.8	3158.24	ANXA2	sp|P07355|ANXA2_HUMAN	245_1	sp|P07355|ANXA2_HUMAN	83.8209	NA	38579.8	AEDGSVIDYELIDQDAR;ALLYLCGGDD;AYTNFDAER;DALNIETAIK;DIISDTSGDFR;DLYDAGVK;ELASALK;GLGTDEDSLIEIICSR;GVDEVTIVNILTNR;LMVALAK;LSLEGDHSTPPSAYGSVK;LYDSMK;QDIAFAYQR;RAEDGSVIDYELIDQDAR;SEVDMLK;SLYYYIQQDTK;SVPHLQK;SYSPYDMLESIR;TKGVDEVTIVNILTNR;TNQELQEINR;TPAQYDASELK;WISIMTER	1;1;1;1;1;1;1;1;1;1;1;1;1;1;1;1;1;1;1;1;1;1	22	47	0.6224	25473;25472;25474;9829;9508;9510;9509;9511;9576;9575;13899;13898;13902;3694;3695;536;24420;21549;761;760;24995;24994;24993;934;10318;10317;10338;26394;2240;19205;19204;1958;19998;19997;24374;14515;14514;14513;14509;14511;14508;13831;13830;13829;13828;13832;7970	-	Annexin A2 OS=Homo sapiens OX=9606 GN=ANXA2 PE=1 SV=2	23384.5	974.356
sp|P61981|1433G_HUMAN	106_3	sp|P61981|1433G_HUMAN	8.15573	NA	28284.9	DSTLIMQLLR;NLLSVAYK;NVTELNEPLSNEER;VISSIEQK;YLAEVATGEK	0;0;1;0;1	2	2	0.2024	12575;13036;4534;19405;4420;9384	-	14-3-3 protein gamma OS=Homo sapiens OX=9606 GN=YWHAG PE=1 SV=2	2985.42	165.857	YWHAG	sp|P61981|1433G_HUMAN	206_4	sp|P61981|1433G_HUMAN	13.2827	NA	28284.9	DSTLIMQLLR;NLLSVAYK;NVTELNEPLSNEER;TAFDDAIAELDTLNEDSYK;YDDMAAAMK;YLAEVATGEK	0;0;1;1;0;1	3	5	0.2834	13288;12779;13287;4369;23050;26704;26705;7358;7357;9342;9343	-	14-3-3 protein gamma OS=Homo sapiens OX=9606 GN=YWHAG PE=1 SV=2	1406.96	78.1644
sp|Q01518|CAP1_HUMAN	191_1	sp|Q01518|CAP1_HUMAN	4.07786	NA	51868.7	LSDLLAPISEQIK	1	1	1	0.0274	17500	-	Adenylyl cyclase-associated protein 1 OS=Homo sapiens OX=9606 GN=CAP1 PE=1 SV=5	1217.35	38.0422	CAP1	sp|Q01518|CAP1_HUMAN	134_1	sp|Q01518|CAP1_HUMAN	20.8465	NA	51868.7	EMNDAAMFYTNR;EVITFR;LSDLLAPISEQIK;NSLDCEIVSAK;VENQENVSNLVIEDTELK;VPTISINK	1;1;1;1;1;1	6	8	0.1432	20039;1088;19323;14202;26422;26423;26421;3471	-	Adenylyl cyclase-associated protein 1 OS=Homo sapiens OX=9606 GN=CAP1 PE=1 SV=5	2204.56	68.8925
sp|P69905|HBA_HUMAN	136_1	sp|P69905|HBA_HUMAN	2.39178	NA	15247.9	MFLSFPTTK	1	1	1	0.0634	9111	-	Hemoglobin subunit alpha OS=Homo sapiens OX=9606 GN=HBA1 PE=1 SV=2	290.525	36.3156	HBA1
sp|O60218|AK1BA_HUMAN	181_1	sp|O60218|AK1BA_HUMAN	4.07786	NA	35996.8	MPIVGLGTWK	1	1	1	0.0316	9990	-	Aldo-keto reductase family 1 member B10 OS=Homo sapiens OX=9606 GN=AKR1B10 PE=1 SV=2	797.761	37.9886	AKR1B10	sp|O60218|AK1BA_HUMAN	346_1	sp|O60218|AK1BA_HUMAN	6.91855	NA	35996.8	IVENIQVFDFK;NVIVIPK	1;1	2	2	0.057	17649;1422	-	Aldo-keto reductase family 1 member B10 OS=Homo sapiens OX=9606 GN=AKR1B10 PE=1 SV=2	479.315	22.8245
sp|Q13011|ECH1_HUMAN	263_1	sp|Q13011|ECH1_HUMAN	4.07786	NA	35793.4	VNLLYSR	1	1	1	0.0213	3409	-	Delta(3,5)-Delta(2,4)-dienoyl-CoA isomerase, mitochondrial OS=Homo sapiens OX=9606 GN=ECH1 PE=1 SV=2	967.378	43.9717	ECH1
sp|P31946|1433B_HUMAN	106_2	sp|P31946|1433B_HUMAN	3.03647	NA	28064.8	DSTLIMQLLR;EMQPTHPIR;NLLSVAYK;QTTVSNSQQAYQEAFEISK;VISSIEQK	0;0;0;1;0	1	1	0.2195	12575;13036;10189;4534;20778;4420	-	14-3-3 protein beta/alpha OS=Homo sapiens OX=9606 GN=YWHAB PE=1 SV=3	489.858	28.8152	YWHAB	sp|P31946|1433B_HUMAN	206_3	sp|P31946|1433B_HUMAN	11.8548	NA	28064.8	DSTLIMQLLR;NLLSVAYK;QTTVSNSQQAYQEAFEISK;TAFDEAIAELDTLNEESYK;YDDMAAAMK;YLSEVASGDNK	0;0;1;1;0;1	3	3	0.3089	13288;12779;13287;4369;26824;26823;7358;7357;12529	-	14-3-3 protein beta/alpha OS=Homo sapiens OX=9606 GN=YWHAB PE=1 SV=3	563.648	33.1558
sp|P60174|TPIS_HUMAN	188_1	sp|P60174|TPIS_HUMAN	12.2336	NA	30771.7	SNVSDAVAQSTR;VVFEQTK;VVLAYEPVWAIGTGK	1;1;1	3	5	0.1189	13761;13762;3026;3025;19146	-	Triosephosphate isomerase OS=Homo sapiens OX=9606 GN=TPI1 PE=1 SV=3	1065.3	56.0683	TPI1	sp|P60174|TPIS_HUMAN	367_1	sp|P60174|TPIS_HUMAN	25.0223	NA	30771.7	DCGATWVVLGHSER;FFVGGNWK;HVFGESDELIGQK;QSLGELIGTLNAAK;VTNGAFTGEISPGMIK;VVLAYEPVWAIGTGK	1;1;1;1;1;1	6	7	0.2797	22235;5630;19949;19052;19053;22757;22503	-	Triosephosphate isomerase OS=Homo sapiens OX=9606 GN=TPI1 PE=1 SV=3	1347.64	70.9285
sp|P40429|RL13A_HUMAN	279_1	sp|P40429|RL13A_HUMAN	4.07786	NA	23562.4	FAYLGR	1	1	1	0.0296	441	-	60S ribosomal protein L13a OS=Homo sapiens OX=9606 GN=RPL13A PE=1 SV=2	1478.93	86.9961	RPL13A	sp|P40429|RL13A_HUMAN	563_1	sp|P40429|RL13A_HUMAN	2.67772	NA	23562.4	FAYLGR	1	1	1	0.0296	455	-	60S ribosomal protein L13a OS=Homo sapiens OX=9606 GN=RPL13A PE=1 SV=2	136.559	8.03287
sp|P12956|XRCC6_HUMAN	103_1	sp|P12956|XRCC6_HUMAN	4.07786	NA	69799.1	NIYVLQELDNPGAK	1	1	1	0.023	18951	-	X-ray repair cross-complementing protein 6 OS=Homo sapiens OX=9606 GN=XRCC6 PE=1 SV=2	895.448	22.3862	XRCC6	sp|P12956|XRCC6_HUMAN	196_1	sp|P12956|XRCC6_HUMAN	29.0288	NA	69799.1	DSLIFLVDASK;DTGIFLDLMHLK;ELVYPPDYNPEGK;ILELDQFK;LGSLVDEFK;NIYVLQELDNPGAK;TFNTSTGGLLLPSDTK	1;1;1;1;1;1;1	7	8	0.1363	13357;18773;21149;7101;7166;7162;22059;23155	-	X-ray repair cross-complementing protein 6 OS=Homo sapiens OX=9606 GN=XRCC6 PE=1 SV=2	1755.89	43.8972
sp|P62258|1433E_HUMAN	106_1	sp|P62258|1433E_HUMAN	11.1922	NA	29155.4	DSTLIMQLLR;EDLVYQAK;NLLSVAYK;YDEMVESMK;YLAEFATGNDR	0;1;0;1;1	3	3	0.1804	12575;13036;6090;4534;10852;14326	-	14-3-3 protein epsilon OS=Homo sapiens OX=9606 GN=YWHAE PE=1 SV=1	2914.44	161.914	YWHAE	sp|P62258|1433E_HUMAN	206_6	sp|P62258|1433E_HUMAN	33.0547	NA	29155.4	AAFDDAIAELDTLSEESYK;AASDIAMTELPPTHPIR;DNLTLWTSDMQGDGEEQNK;DSTLIMQLLR;EAAENSLVAYK;EDLVYQAK;LICCDILDVLDK;NLLSVAYK;YDEMVESMK;YLAEFATGNDR	1;1;1;0;1;1;1;0;1;1	8	12	0.4863	26498;24793;24792;26930;13288;12779;13287;12941;5934;5933;5932;20349;4369;10937;14906;14907	-	14-3-3 protein epsilon OS=Homo sapiens OX=9606 GN=YWHAE PE=1 SV=1	3171.37	176.187
sp|P30040|ERP29_HUMAN	277_1	sp|P30040|ERP29_HUMAN	2.62098	NA	28975.2	GALPLDTVTFYK	1	1	1	0.046	15809	-	Endoplasmic reticulum resident protein 29 OS=Homo sapiens OX=9606 GN=ERP29 PE=1 SV=4	426.009	28.4006	ERP29	sp|P30040|ERP29_HUMAN	558_1	sp|P30040|ERP29_HUMAN	7.42718	NA	28975.2	ESYPVFYLFR;GALPLDTVTFYK	1;1	2	2	0.0843	16830;16955	-	Endoplasmic reticulum resident protein 29 OS=Homo sapiens OX=9606 GN=ERP29 PE=1 SV=4	175.289	11.686
sp|O60506|HNRPQ_HUMAN	117_1	sp|O60506|HNRPQ_HUMAN	11.7393	NA	69559.6	AGPIWDLR;LMMDPLTGLNR;NLANTVTEEILEK;TGYTLDVTTGQR	1;1;1;1	4	6	0.0706	5028;14445;14826;18021;15529;15528	-	Heterogeneous nuclear ribonucleoprotein Q OS=Homo sapiens OX=9606 GN=SYNCRIP PE=1 SV=2	4306.28	110.418	SYNCRIP	sp|O60506|HNRPQ_HUMAN	229_1	sp|O60506|HNRPQ_HUMAN	28.7257	NA	69559.6	AGPIWDLR;DLEGENIEIVFAKPPDQK;EFNEDGALAVLQQFK;GFCFLEYEDHK;LMMDPLTGLNR;NLANTVTEEILEK;VTEGLTDVILYHQPDDK	1;1;1;1;1;1;1	7	8	0.1493	4906;4905;26290;23769;19672;15041;20265;25692	-	Heterogeneous nuclear ribonucleoprotein Q OS=Homo sapiens OX=9606 GN=SYNCRIP PE=1 SV=2	2057.98	52.7686
sp|P31150|GDIA_HUMAN	89_1	sp|P31150|GDIA_HUMAN	4.07786	NA	50550.1	FQLLEGPPESMGR;LYSESLAR;MLLYTEVTR	1;0;0	1	1	0.0671	17885;5330;10697	-	Rab GDP dissociation inhibitor alpha OS=Homo sapiens OX=9606 GN=GDI1 PE=1 SV=2	698.99	26.8842	GDI1	sp|P31150|GDIA_HUMAN	165_1	sp|P31150|GDIA_HUMAN	7.1053	NA	50550.1	DWNVDLIPK;GRDWNVDLIPK;LYSESLAR;MLLYTEVTR;NPYYGGESSSITPLEELYK;TDDYLDQPCLETVNR	0;0;0;0;1;1	2	2	0.1387	9940;16607;5193;10781;10782;26782;24949	-	Rab GDP dissociation inhibitor alpha OS=Homo sapiens OX=9606 GN=GDI1 PE=1 SV=2	113.434	4.36285
sp|Q16881|TRXR1_HUMAN	5_1	sp|Q16881|TRXR1_HUMAN	4.07786	NA	70862.2	VELTPVAIQAGR	1	1	1	0.0185	14262	-	Thioredoxin reductase 1, cytoplasmic OS=Homo sapiens OX=9606 GN=TXNRD1 PE=1 SV=3	524.254	13.7962	TXNRD1	sp|Q16881|TRXR1_HUMAN	5_1	sp|Q16881|TRXR1_HUMAN	13.2827	NA	70862.2	VMVLDFVTPTPLGTR;VVAQSTNSEEIIEGEYNTVMLAIGR;VVYENAYGQFIGPHR	1;1;1	3	3	0.0847	23078;28017;24165	-	Thioredoxin reductase 1, cytoplasmic OS=Homo sapiens OX=9606 GN=TXNRD1 PE=1 SV=3	454.996	11.9736
sp|Q96P63|SPB12_HUMAN	274_1	sp|Q96P63|SPB12_HUMAN	12.2336	NA	46247.1	ADLTGISPSPNLYLSK;AQILEMR;TDYTLSIANR	1;1;1	3	3	0.0815	19580;3295;11490	-	Serpin B12 OS=Homo sapiens OX=9606 GN=SERPINB12 PE=1 SV=1	2088.6	104.43	SERPINB12
sp|P84098|RL19_HUMAN	177_1	sp|P84098|RL19_HUMAN	3.03647	NA	23451.2	LLADQAEAR	1	1	1	0.0459	6667	-	60S ribosomal protein L19 OS=Homo sapiens OX=9606 GN=RPL19 PE=1 SV=1	225.645	25.0717	RPL19
sp|P30101|PDIA3_HUMAN	92_1	sp|P30101|PDIA3_HUMAN	26.4186	NA	56746.7	DPNIVIAK;EATNPPVIQEEKPK;FLQDYFDGNLK;GFPTIYFSPANK;LAPEYEAAATR;MDATANDVPSPYEVR;QAGPASVPLR;TADGIVSHLK	1;1;1;1;1;1;1;1	8	9	0.1802	3533;18983;16461;16130;16131;12621;19523;6939;8232	-	Protein disulfide-isomerase A3 OS=Homo sapiens OX=9606 GN=PDIA3 PE=1 SV=4	9993.45	312.295	PDIA3	sp|P30101|PDIA3_HUMAN	173_1	sp|P30101|PDIA3_HUMAN	47.8084	NA	56746.7	DASIVGFFDDSFSEAHSEFLK;DLLIAYYDVDYEK;ELSDFISYLQR;FVMQEEFSR;GFPTIYFSPANK;LAPEYEAAATR;LNFAVASR;QAGPASVPLR;TADGIVSHLK;TFSHELSDFGLESTAGEIPVVAIR;VVVAENFDEIVNNENK;YGVSGYPTLK	1;1;1;1;1;1;1;1;1;1;1;1	12	16	0.3069	27442;22731;18090;12203;17387;12839;12836;12837;12835;3633;6832;8124;23866;24891;9458;9457	-	Protein disulfide-isomerase A3 OS=Homo sapiens OX=9606 GN=PDIA3 PE=1 SV=4	3089.75	96.5548
sp|P06744|G6PI_HUMAN	62_1	sp|P06744|G6PI_HUMAN	10.6677	NA	63107.2	SNTPILVDGK;SPEDLER;TFTTQETITNAETAK	1;1;1	3	3	0.0573	8318;2891;19478	-	Glucose-6-phosphate isomerase OS=Homo sapiens OX=9606 GN=GPI PE=1 SV=4	2890.3	87.5847	GPI	sp|P06744|G6PI_HUMAN	108_1	sp|P06744|G6PI_HUMAN	24.7097	NA	63107.2	FAAYFQQGDMESNGK;INYTEGR;NLVTEDVMR;SNTPILVDGK;TFTTQETITNAETAK;TLAQLNPESSLFIIASK;VWYVSNIDGTHIAK	1;1;1;1;1;1;1	7	8	0.1559	23626;2992;9209;8221;8218;23200;24887;22499	-	Glucose-6-phosphate isomerase OS=Homo sapiens OX=9606 GN=GPI PE=1 SV=4	2714.15	82.2469
sp|P30041|PRDX6_HUMAN	259_1	sp|P30041|PRDX6_HUMAN	10.1923	NA	25019.2	DGDSVMVLPTIPEEEAK;LAPEFAK;VVFVFGPDK	1;1;1	3	4	0.1473	20150;1298;7286;7287	-	Peroxiredoxin-6 OS=Homo sapiens OX=9606 GN=PRDX6 PE=1 SV=3	3945.75	246.609	PRDX6	sp|P30041|PRDX6_HUMAN	517_1	sp|P30041|PRDX6_HUMAN	34.9113	NA	25019.2	DFTPVCTTELGR;DGDSVMVLPTIPEEEAK;ELAILLGMLDPAEK;ELAILLGMLDPAEKDEK;LIALSIDSVEDHLAWSK;LPFPIIDDR;NFDEILR;PGGLLLGDVAPNFEANTTVGR;VVFVFGPDK	1;1;1;1;1;1;1;1;1	9	13	0.4866	18637;24861;24862;24863;20998;25300;15209;9486;9482;4330;26549;7173;7172	-	Peroxiredoxin-6 OS=Homo sapiens OX=9606 GN=PRDX6 PE=1 SV=3	1673.46	104.591
sp|Q15233|NONO_HUMAN	111_1	sp|Q15233|NONO_HUMAN	4.07786	NA	54197.3	VELDNMPLR	1	1	1	0.0191	9552	-	Non-POU domain-containing octamer-binding protein OS=Homo sapiens OX=9606 GN=NONO PE=1 SV=4	552.026	22.081	NONO
sp|P0CG48|UBC_HUMAN	4_1	sp|P0CG48|UBC_HUMAN	8.15573	NA	76991.5	ESTLHLVLR;TITLEVEPSDTIENVK	1;1	2	2	0.0365	9016;20017	sp|P62979|RS27A_HUMAN;sp|P0CG47|UBB_HUMAN;sp|P62987|RL40_HUMAN	Polyubiquitin-C OS=Homo sapiens OX=9606 GN=UBC PE=1 SV=3	4846.88	76.9346	UBC	sp|P0CG48|UBC_HUMAN	3_1	sp|P0CG48|UBC_HUMAN	15.6457	NA	76991.5	ESTLHLVLR;MQIFVK;TITLEVEPSDTIENVK;TLSDYNIQK	1;1;1;1	4	7	0.0584	8942;1112;24537;24536;9364;9365;9363	sp|P62979|RS27A_HUMAN;sp|P0CG47|UBB_HUMAN;sp|P62987|RL40_HUMAN	Polyubiquitin-C OS=Homo sapiens OX=9606 GN=UBC PE=1 SV=3	2651.37	42.0853
sp|P37837|TALDO_HUMAN	286_1	sp|P37837|TALDO_HUMAN	2.43749	NA	37516.5	LLGELLQDNAK	1	1	1	0.0326	13285	-	Transaldolase OS=Homo sapiens OX=9606 GN=TALDO1 PE=1 SV=2	1433.72	62.3356	TALDO1	sp|P37837|TALDO_HUMAN	573_1	sp|P37837|TALDO_HUMAN	17.745	NA	37516.5	LIELYK;LLGELLQDNAK;LSSTWEGIQAGK;LVPVLSAK;MESALDQLK;SYEPLEDPGVK	1;1;1;1;1;1	6	6	0.1691	1342;13540;15574;2346;7953;14131	-	Transaldolase OS=Homo sapiens OX=9606 GN=TALDO1 PE=1 SV=2	2737.99	119.043
sp|Q99832|TCPH_HUMAN	31_1	sp|Q99832|TCPH_HUMAN	4.07786	NA	59328.9	LPIGDVATQYFADR	1	1	1	0.0258	18877	-	T-complex protein 1 subunit eta OS=Homo sapiens OX=9606 GN=CCT7 PE=1 SV=2	556.194	15.8912	CCT7	sp|Q99832|TCPH_HUMAN	55_1	sp|Q99832|TCPH_HUMAN	18.9601	NA	59328.9	ALEIIPR;GGAEQFMEETER;LPIGDVATQYFADR;SQDAEVGDGTTSVTLLAAEFLK;TFSYAGFEMQPK	1;1;1;1;1	5	5	0.1234	2023;18364;21918;20806;18836	-	T-complex protein 1 subunit eta OS=Homo sapiens OX=9606 GN=CCT7 PE=1 SV=2	646.446	18.4699
sp|P39023|RL3_HUMAN	214_1	sp|P39023|RL3_HUMAN	2.3325	NA	46079.8	VAFSVAR	1	1	1	0.0174	854	-	60S ribosomal protein L3 OS=Homo sapiens OX=9606 GN=RPL3 PE=1 SV=2	1115.52	50.7055	RPL3
sp|P19338|NUCL_HUMAN	50_1	sp|P19338|NUCL_HUMAN	32.3329	NA	76568.4	ALVATPGK;EAMEDGEIDGNK;ESFDGSVR;GFGFVDFNSEEDAK;GLSEDTTEETLK;QGTEIDGR;SISLYYTGEK;TGISDVFAK;VAVATPAK	1;1;1;1;1;1;1;1;1	9	12	0.1254	962;961;15460;15461;4210;4211;18841;15764;3679;11688;5308;960	-	Nucleolin OS=Homo sapiens OX=9606 GN=NCL PE=1 SV=3	13198.1	286.915	NCL	sp|P19338|NUCL_HUMAN	88_1	sp|P19338|NUCL_HUMAN	53.2702	NA	76568.4	ALELTGLK;EVFEDAAEIR;FGYVDFESAEDLEK;GFGFVDFNSEEDAK;GIAYIEFK;GLSEDTTEETLK;GLSEDTTEETLKESFDGSVR;GYAFIEFASFEDAK;KFGYVDFESAEDLEK;NDLAVVDVR;SISLYYTGEK;TGISDVFAK;TLVLSNLSYSATEETLQEVFEK;VTLDWAKPK	1;1;1;1;1;1;1;1;1;1;1;1;1;1	14	20	0.2085	2820;12406;12405;23101;23102;21853;21852;5248;16870;26997;22375;24408;6935;6936;6937;11860;5174;5173;27741;122	-	Nucleolin OS=Homo sapiens OX=9606 GN=NCL PE=1 SV=3	26662.8	579.627
sp|Q08211|DHX9_HUMAN	140_1	sp|Q08211|DHX9_HUMAN	45.5937	NA	140869	AAECNIVVTQPR;AAMEALVVEVTK;DFVNYLVR;DVVQAYPEVR;EGETVEPYK;ELDALDANDELTPLGR;LAQFEPSQR;LNMATLR;QPAIISQLDPVNER;SSVNCPFSSQDMK;VFDPVPVGVTK;YPSPFFVFGEK;YQILPLHSQIPR	1;1;1;1;1;1;1;1;1;1;1;1;1	13	17	0.1134	16421;14449;7785;12133;12132;8540;19832;9237;9236;2201;18985;18991;18175;11611;15653;15652;17932	-	ATP-dependent RNA helicase A OS=Homo sapiens OX=9606 GN=DHX9 PE=1 SV=4	11438.3	156.69	DHX9	sp|Q08211|DHX9_HUMAN	262_1	sp|Q08211|DHX9_HUMAN	63.4425	NA	140869	AAECNIVVTQPR;AAMEALVVEVTK;AIEPPPLDAVIEAEHTLR;DINTDFLLVVLR;ELDALDANDELTPLGR;GISHVIVDEIHER;LAQFEPSQR;LGGIGQFLAK;LNQYFQK;NELMYQLEQDHDLQAILQER;QLYHLGVVEAYSGLTK;QPAIISQLDPVNER;TTQVPQFILDDFIQNDR;VQSDGQIVLVDDWIK;YPSPFFVFGEK	1;1;1;1;1;1;1;1;1;1;1;1;1;1;1	15	17	0.1591	17796;15052;25890;19123;24092;20847;9176;9179;7048;7047;5242;27707;24427;22154;18032;23844;16755	-	ATP-dependent RNA helicase A OS=Homo sapiens OX=9606 GN=DHX9 PE=1 SV=4	4899.07	67.1106
sp|Q32P51|RA1L2_HUMAN	146_1	sp|Q32P51|RA1L2_HUMAN	2.28179	NA	34204.3	IEVIEIMTDR	1	1	1	0.0312	13426	sp|P09651|ROA1_HUMAN	Heterogeneous nuclear ribonucleoprotein A1-like 2 OS=Homo sapiens OX=9606 GN=HNRNPA1L2 PE=2 SV=2	1328.5	83.0314	HNRNPA1L2	sp|Q32P51|RA1L2_HUMAN	269_1	sp|Q32P51|RA1L2_HUMAN	7.54795	NA	34204.3	GFAFVTFDDHDSVDK;IEVIEIMTDR	1;1	2	3	0.0781	23683;13723;13722	sp|P09651|ROA1_HUMAN	Heterogeneous nuclear ribonucleoprotein A1-like 2 OS=Homo sapiens OX=9606 GN=HNRNPA1L2 PE=2 SV=2	578.05	36.1281
sp|P01857|IGHG1_HUMAN	82_1	sp|P01857|IGHG1_HUMAN	5.65745	NA	36083.2	EPQVYTLPPSR;GPSVFPLAPSSK	1;1	2	2	0.0697	15024;12467	sp|P0DOX5|IGG1_HUMAN	Immunoglobulin heavy constant gamma 1 OS=Homo sapiens OX=9606 GN=IGHG1 PE=1 SV=1	2512.18	167.479	IGHG1	sp|P01857|IGHG1_HUMAN	156_1	sp|P01857|IGHG1_HUMAN	4.30002	NA	36083.2	ALPAPIEK;GPSVFPLAPSSK	1;1	2	2	0.0606	2652;12683	sp|P0DOX5|IGG1_HUMAN	Immunoglobulin heavy constant gamma 1 OS=Homo sapiens OX=9606 GN=IGHG1 PE=1 SV=1	1423.51	94.9006
sp|P05556|ITB1_HUMAN	61_1	sp|P05556|ITB1_HUMAN	10.7767	NA	88357	IGFGSFVEK;SAVTTVVNPK;SLGTDLMNEMR	1;1;1	3	4	0.0376	6594;7519;14598;14603	-	Integrin beta-1 OS=Homo sapiens OX=9606 GN=ITGB1 PE=1 SV=2	3644.12	101.226	ITGB1	sp|P05556|ITB1_HUMAN	103_1	sp|P05556|ITB1_HUMAN	26.0853	NA	88357	GEVFNELVGK;IGFGSFVEK;LKPEDITQIQPQQLVLR;LSEGVTISYK;NVLSLTNK;SGEPQTFTLK;SLGTDLMNEMR	1;1;1;1;1;1;1	7	8	0.094	9694;6453;6452;26174;9850;3897;10194;15251	-	Integrin beta-1 OS=Homo sapiens OX=9606 GN=ITGB1 PE=1 SV=2	3846.9	106.858
sp|P78371|TCPB_HUMAN	26_1	sp|P78371|TCPB_HUMAN	2.75956	NA	57452.1	GATQQILDEAER	1	1	1	0.0224	15911	-	T-complex protein 1 subunit beta OS=Homo sapiens OX=9606 GN=CCT2 PE=1 SV=4	547.6	15.2111	CCT2	sp|P78371|TCPB_HUMAN	51_1	sp|P78371|TCPB_HUMAN	15.3072	NA	57452.1	EALLSSAVDHGSDEVK;EAVAMESYAK;GATQQILDEAER;LGGSLADSYLDEGFLLDK	1;1;1;1	4	4	0.1047	23209;9895;17104;25507	-	T-complex protein 1 subunit beta OS=Homo sapiens OX=9606 GN=CCT2 PE=1 SV=4	708.057	19.6683
sp|P52209|6PGD_HUMAN	158_1	sp|P52209|6PGD_HUMAN	4.07786	NA	53106	VDDFLANEAK	1	1	1	0.0207	10564	-	6-phosphogluconate dehydrogenase, decarboxylating OS=Homo sapiens OX=9606 GN=PGD PE=1 SV=3	1350.83	48.2441	PGD	sp|P52209|6PGD_HUMAN	296_1	sp|P52209|6PGD_HUMAN	4.42758	NA	53106	NPELQNLLLDDFFK	1	1	1	0.029	23740	-	6-phosphogluconate dehydrogenase, decarboxylating OS=Homo sapiens OX=9606 GN=PGD PE=1 SV=3	14.7295	0.526052
sp|P17174|AATC_HUMAN	58_1	sp|P17174|AATC_HUMAN	6.58988	NA	46218.5	LALGDDSPALK;NFGLYNER	1;1	2	2	0.046	9940;7402	-	Aspartate aminotransferase, cytoplasmic OS=Homo sapiens OX=9606 GN=GOT1 PE=1 SV=3	2517.48	96.8261	GOT1	sp|P17174|AATC_HUMAN	99_1	sp|P17174|AATC_HUMAN	20.2606	NA	46218.5	EPESILQVLSQMEK;ITWSNPPAQGAR;IVASTLSNPELFEEWTGNVK;LALGDDSPALK;VNLGVGAYR	1;1;1;1;1	5	5	0.1598	22873;16177;27130;9954;5475	-	Aspartate aminotransferase, cytoplasmic OS=Homo sapiens OX=9606 GN=GOT1 PE=1 SV=3	1452.57	55.868
sp|P62753|RS6_HUMAN	197_1	sp|P62753|RS6_HUMAN	4.07786	NA	28663	DIPGLTDTTVPR	1	1	1	0.0482	14981	-	40S ribosomal protein S6 OS=Homo sapiens OX=9606 GN=RPS6 PE=1 SV=1	1439.15	110.704	RPS6	sp|P62753|RS6_HUMAN	389_1	sp|P62753|RS6_HUMAN	8.85516	NA	28663	DIPGLTDTTVPR;MATEVAADALGEEWK	1;1	2	3	0.1084	15796;15790;22737	-	40S ribosomal protein S6 OS=Homo sapiens OX=9606 GN=RPS6 PE=1 SV=1	792.755	60.9811
sp|P27824|CALX_HUMAN	205_1	sp|P27824|CALX_HUMAN	14.9931	NA	67525.8	EIEDPEDR;GTLSGWILSK;IVDDWANDGWGLK;TPELNLDQFHDK	1;1;1;1	4	6	0.0726	7117;7115;7119;8850;18201;17836	-	Calnexin OS=Homo sapiens OX=9606 GN=CANX PE=1 SV=2	4320.33	160.012	CANX	sp|P27824|CALX_HUMAN	407_1	sp|P27824|CALX_HUMAN	33.5433	NA	67525.8	AEEDEILNR;APVPTGEVYFADSFDR;GTLSGWILSK;IPDPEAVKPDDWDEDAPAK;IPNPDFFEDLEPFR;IVDDWANDGWGLK;KIPNPDFFEDLEPFR;TPELNLDQFHDK	1;1;1;1;1;1;1;1	8	10	0.1588	9589;24359;8781;26586;24032;24033;24034;20545;25144;19914	-	Calnexin OS=Homo sapiens OX=9606 GN=CANX PE=1 SV=2	1843.62	68.2824
sp|Q8NAB2|KBTB3_HUMAN	84_1	sp|Q8NAB2|KBTB3_HUMAN	2.19215	NA	69794	LFVIGGK	1	1	1	0.0114	570	-	Kelch repeat and BTB domain-containing protein 3 OS=Homo sapiens OX=9606 GN=KBTBD3 PE=2 SV=3	1366.82	35.9691	KBTBD3
sp|P47755|CAZA2_HUMAN	67_1	sp|P47755|CAZA2_HUMAN	3.03647	NA	32928.6	LLLNNDNLLR	1	1	1	0.035	12784	sp|P52907|CAZA1_HUMAN	F-actin-capping protein subunit alpha-2 OS=Homo sapiens OX=9606 GN=CAPZA2 PE=1 SV=3	877.456	58.4971	CAPZA2
sp|P02042|HBD_HUMAN	33_1	sp|P02042|HBD_HUMAN	7.11433	NA	16045.3	LLVVYPWTQR;VLGAFSDGLAHLDNLK	1;1	2	2	0.1769	14792;19553	sp|P68871|HBB_HUMAN	Hemoglobin subunit delta OS=Homo sapiens OX=9606 GN=HBD PE=1 SV=2	1642.94	149.358	HBD	sp|P02042|HBD_HUMAN	58_1	sp|P02042|HBD_HUMAN	7.42718	NA	16045.3	LLVVYPWTQR;VVAGVANALAHKYH	1;1	2	3	0.1633	15520;15519;19812	sp|P68871|HBB_HUMAN	Hemoglobin subunit delta OS=Homo sapiens OX=9606 GN=HBD PE=1 SV=2	559.513	50.8648
sp|Q9BQE3|TBA1C_HUMAN	137_2	sp|Q9BQE3|TBA1C_HUMAN	14.6711	NA	49863.5	AFVHWYVGEGMEEGEFSEAR;AVFVDLEPTVIDEVR;DVNAAIATIK;EDMAALEK;EIIDLVLDR;FDLMYAK;IHFPLATYAPVISAEK;LSVDYGK;TIGGGDDSFNTFFSETGAGK;VGINYQPPTVVPGGDLAK	0;1;1;0;1;0;0;0;1;0	4	5	0.2895	20895;19688;7524;7525;4472;9529;3968;19883;19884;19882;19885;1420;20574;20135	sp|Q71U36|TBA1A_HUMAN;sp|P68363|TBA1B_HUMAN	Tubulin alpha-1C chain OS=Homo sapiens OX=9606 GN=TUBA1C PE=1 SV=1	20727.8	942.172	TUBA1C
sp|Q9H853|TBA4B_HUMAN	56_1	sp|Q9H853|TBA4B_HUMAN	4.07786	NA	27533.7	QIFHPEQLITGK	1	1	1	0.0498	17255	-	Putative tubulin-like protein alpha-4B OS=Homo sapiens OX=9606 GN=TUBA4B PE=5 SV=2	5741.74	478.478	TUBA4B	sp|Q9H853|TBA4B_HUMAN	95_1	sp|Q9H853|TBA4B_HUMAN	4.42758	NA	27533.7	QIFHPEQLITGK	1	1	5	0.0498	18974;18973;18972;18611;18971	-	Putative tubulin-like protein alpha-4B OS=Homo sapiens OX=9606 GN=TUBA4B PE=5 SV=2	586.204	48.8503
sp|P46776|RL27A_HUMAN	284_1	sp|P46776|RL27A_HUMAN	2.43749	NA	16551	TGAAPIIDVVR	1	1	1	0.0743	10286	-	60S ribosomal protein L27a OS=Homo sapiens OX=9606 GN=RPL27A PE=1 SV=2	1057.7	132.212	RPL27A
sp|E9PAV3|NACAM_HUMAN	24_1	sp|E9PAV3|NACAM_HUMAN	4.07786	NA	205295	SPASDTYIVFGEAK	1	1	1	0.0067	18161	sp|Q13765|NACA_HUMAN	Nascent polypeptide-associated complex subunit alpha, muscle-specific form OS=Homo sapiens OX=9606 GN=NACA PE=1 SV=1	1310.33	12.2461	NACA	sp|E9PAV3|NACAM_HUMAN	44_1	sp|E9PAV3|NACAM_HUMAN	6.8909	NA	205295	DIELVMSQANVSR;SPASDTYIVFGEAK	1;1	2	2	0.013	20026;20480	sp|Q13765|NACA_HUMAN	Nascent polypeptide-associated complex subunit alpha, muscle-specific form OS=Homo sapiens OX=9606 GN=NACA PE=1 SV=1	754.866	7.05482
sp|P15311|EZRI_HUMAN	69_1	sp|P15311|EZRI_HUMAN	17.3066	NA	69369.7	APDFVFYAPR;IGFPWSEIR;NISFNDK;QLLTLSSELSQAR;SQEQLAAELAEYTAK	1;1;1;1;1	5	7	0.0922	12338;12337;12339;10066;2637;17731;19457	-	Ezrin OS=Homo sapiens OX=9606 GN=EZR PE=1 SV=4	6341.13	162.593	EZR	sp|P15311|EZRI_HUMAN	127_3	sp|P15311|EZRI_HUMAN	19.7348	NA	69369.7	APDFVFYAPR;DNAMLEYLK;FYPEDVAEELIQDITQK;IALLEEAR;NISFNDK;QLLTLSSELSQAR;SQEQLAAELAEYTAK	0;1;1;1;0;1;1	5	7	0.1348	12538;12536;12537;9837;26258;4527;4528;2604;19722;23149;23150	-	Ezrin OS=Homo sapiens OX=9606 GN=EZR PE=1 SV=4	1031.84	26.4574
sp|Q13867|BLMH_HUMAN	161_1	sp|Q13867|BLMH_HUMAN	8.15573	NA	52528	IGPITPLEFYR;TLYNNQPIDFLK	1;1	2	2	0.0505	15441;17947	-	Bleomycin hydrolase OS=Homo sapiens OX=9606 GN=BLMH PE=1 SV=1	1076.35	38.4412	BLMH	sp|Q13867|BLMH_HUMAN	308_1	sp|Q13867|BLMH_HUMAN	4.42758	NA	52528	IGPITPLEFYR	1	1	1	0.0242	16445	-	Bleomycin hydrolase OS=Homo sapiens OX=9606 GN=BLMH PE=1 SV=1	227.997	8.14274
sp|Q9Y265|RUVB1_HUMAN	225_1	sp|Q9Y265|RUVB1_HUMAN	2.51202	NA	50196.3	LDPSIFESLQK	1	1	1	0.0241	14834	-	RuvB-like 1 OS=Homo sapiens OX=9606 GN=RUVBL1 PE=1 SV=1	403.211	18.3278	RUVBL1	sp|Q9Y265|RUVB1_HUMAN	438_1	sp|Q9Y265|RUVB1_HUMAN	8.3197	NA	50196.3	AVLLAGPPGTGK;LDPSIFESLQK;TALALAIAQELGSK	1;1;1	3	3	0.0811	9354;15582;18435	-	RuvB-like 1 OS=Homo sapiens OX=9606 GN=RUVBL1 PE=1 SV=1	404.889	18.404
sp|P78417|GSTO1_HUMAN	152_1	sp|P78417|GSTO1_HUMAN	4.07786	NA	27548	VPSLVGSFIR	1	1	1	0.0415	9215	-	Glutathione S-transferase omega-1 OS=Homo sapiens OX=9606 GN=GSTO1 PE=1 SV=2	372.09	24.806	GSTO1	sp|P78417|GSTO1_HUMAN	282_1	sp|P78417|GSTO1_HUMAN	13.5654	NA	27548	GSAPPGPVPEGSIR;HEVININLK;MILELFSK;VPSLVGSFIR	1;1;1;1	4	4	0.1701	16840;9327;6368;9153	-	Glutathione S-transferase omega-1 OS=Homo sapiens OX=9606 GN=GSTO1 PE=1 SV=2	673.471	44.8981
sp|Q08188|TGM3_HUMAN	142_1	sp|Q08188|TGM3_HUMAN	2.62098	NA	76583.6	VPDESEVVVER	1	1	1	0.0159	14354	-	Protein-glutamine gamma-glutamyltransferase E OS=Homo sapiens OX=9606 GN=TGM3 PE=1 SV=4	415.686	9.66713	TGM3
sp|Q9NSE4|SYIM_HUMAN	22_1	sp|Q9NSE4|SYIM_HUMAN	2.62098	NA	113719	ADLYLEGK	1	1	1	0.0079	4548	-	Isoleucine--tRNA ligase, mitochondrial OS=Homo sapiens OX=9606 GN=IARS2 PE=1 SV=2	1687.16	33.0816	IARS2	sp|Q9NSE4|SYIM_HUMAN	40_1	sp|Q9NSE4|SYIM_HUMAN	10.9061	NA	113719	SGDLYVLAADK;TALAEAELEYNPEHVSR;TVIVHGFTLGEK	1;1;1	3	3	0.0395	11585;25602;16277	-	Isoleucine--tRNA ligase, mitochondrial OS=Homo sapiens OX=9606 GN=IARS2 PE=1 SV=2	593.186	11.6311
sp|P56537|IF6_HUMAN	253_1	sp|P56537|IF6_HUMAN	4.07786	NA	26582.2	ETEEILADVLK	1	1	1	0.0449	14428	-	Eukaryotic translation initiation factor 6 OS=Homo sapiens OX=9606 GN=EIF6 PE=1 SV=1	737.214	73.7214	EIF6
sp|Q99729|ROAA_HUMAN	47_1	sp|Q99729|ROAA_HUMAN	6.19623	NA	36202.4	EVYQQQQYGSGGR;GFGFILFK	1;1	2	2	0.0633	18295;5047	-	Heterogeneous nuclear ribonucleoprotein A/B OS=Homo sapiens OX=9606 GN=HNRNPAB PE=1 SV=2	233.044	16.646	HNRNPAB	sp|Q99729|ROAA_HUMAN	79_1	sp|Q99729|ROAA_HUMAN	2.49097	NA	36202.4	EYFGEFGEIEAIELPMDPK;FGEVVDCTIK	1;0	1	1	0.0873	27049;12053	-	Heterogeneous nuclear ribonucleoprotein A/B OS=Homo sapiens OX=9606 GN=HNRNPAB PE=1 SV=2	0	0
sp|P37802|TAGL2_HUMAN	101_1	sp|P37802|TAGL2_HUMAN	11.1922	NA	22377.2	GASQAGMTGYGMPR;GPAYGLSR;TLMNLGGLAVAR	1;1;1	3	4	0.1709	16881;2238;13333;13334	-	Transgelin-2 OS=Homo sapiens OX=9606 GN=TAGLN2 PE=1 SV=3	2691.07	192.22	TAGLN2	sp|P37802|TAGL2_HUMAN	193_1	sp|P37802|TAGL2_HUMAN	23.1733	NA	22377.2	DDGLFSGDPNWFPK;ENFQNWLK;GASQAGMTGYGMPR;NFSDNQLQEGK;TLMNLGGLAVAR;YGINTTDIFQTVDLWEGK	1;1;1;1;1;1	6	11	0.3869	22374;9264;18370;15654;15652;15657;15655;15651;13619;26554;26555	-	Transgelin-2 OS=Homo sapiens OX=9606 GN=TAGLN2 PE=1 SV=3	1370.07	97.8619
sp|Q9UL46|PSME2_HUMAN	20_1	sp|Q9UL46|PSME2_HUMAN	2.62098	NA	27384.3	AMVLDLR	1	1	1	0.0293	2186	-	Proteasome activator complex subunit 2 OS=Homo sapiens OX=9606 GN=PSME2 PE=1 SV=4	598.524	31.5012	PSME2
sp|P30086|PEBP1_HUMAN	249_1	sp|P30086|PEBP1_HUMAN	2.19215	NA	21043.7	LYTLVLTDPDAPSR	1	1	1	0.0749	18836	-	Phosphatidylethanolamine-binding protein 1 OS=Homo sapiens OX=9606 GN=PEBP1 PE=1 SV=3	997.945	90.7222	PEBP1	sp|P30086|PEBP1_HUMAN	497_1	sp|P30086|PEBP1_HUMAN	7.54795	NA	21043.7	GNDISSGTVLSDYVGSGPPK;LYTLVLTDPDAPSR	1;1	2	2	0.1818	25737;21847	-	Phosphatidylethanolamine-binding protein 1 OS=Homo sapiens OX=9606 GN=PEBP1 PE=1 SV=3	553.16	50.2873
sp|Q15717|ELAV1_HUMAN	260_1	sp|Q15717|ELAV1_HUMAN	6.51535	NA	36069.1	DANLYISGLPR;SLFSSIGEVESAK	1;1	2	2	0.0736	13428;16345	-	ELAV-like protein 1 OS=Homo sapiens OX=9606 GN=ELAVL1 PE=1 SV=2	540.111	31.7712	ELAVL1	sp|Q15717|ELAV1_HUMAN	519_1	sp|Q15717|ELAV1_HUMAN	2.43429	NA	36069.1	DVEDMFSR	1	1	1	0.0245	6871	-	ELAV-like protein 1 OS=Homo sapiens OX=9606 GN=ELAVL1 PE=1 SV=2	165.024	9.7073
sp|O00299|CLIC1_HUMAN	202_1	sp|O00299|CLIC1_HUMAN	4.52621	NA	26905.7	GFTIPEAFR;GVTFNVTTVDTK	1;1	2	2	0.0871	8165;14921	-	Chloride intracellular channel protein 1 OS=Homo sapiens OX=9606 GN=CLIC1 PE=1 SV=4	3741.16	220.068	CLIC1	sp|O00299|CLIC1_HUMAN	116_1	sp|O00299|CLIC1_HUMAN	23.2157	NA	26905.7	FSAYIK;GFTIPEAFR;GVTFNVTTVDTK;IGNCPFSQR;LAALNPESNTAGLDIFAK;NSNPALNDNLEK;VLDNYLTSPLPEEVDETSAEDEGVSQR	1;1;1;1;1;1;1	7	9	0.3859	481;8047;15726;15729;9259;24998;17035;28264;28263	-	Chloride intracellular channel protein 1 OS=Homo sapiens OX=9606 GN=CLIC1 PE=1 SV=4	1877.41	110.436
sp|P02545|LMNA_HUMAN	109_1	sp|P02545|LMNA_HUMAN	26.859	NA	74094.7	AAYEAELGDAR;IDSLSAQLSQLQK;ITESEEVVSR;LADALQELR;NSNLVGAAHEELQQSR;TALINSTGEEVAMR;TLEGELHDLR	1;1;1;1;1;1;1	7	7	0.125	11826;17554;11340;7860;19868;18236;12344	-	Prelamin-A/C OS=Homo sapiens OX=9606 GN=LMNA PE=1 SV=1	6902.29	156.87	LMNA	sp|P02545|LMNA_HUMAN	213_1	sp|P02545|LMNA_HUMAN	65.9238	NA	74094.7	AAYEAELGDAR;DLEDSLAR;EAALSTALSEK;EGDLIAAQAR;IDSLSAQLSQLQK;ITESEEVVSR;LADALQELR;LAVYIDR;MQQQLDEYQELLDIK;NIYSEELR;NSNLVGAAHEELQQSR;QNGDDPLLTYR;SLETENAGLR;SNEDQSMGNWQIK;SVGGSGGGSFGDNLVTR;TALINSTGEEVAMR;TLEGELHDLR	1;1;1;1;1;1;1;1;1;1;1;1;1;1;1;1;1	17	23	0.2907	12003;12000;4630;4631;10582;8207;8206;19414;11468;7766;2938;25369;7607;24200;24201;15985;9621;9622;9620;21440;21930;20613;12548	-	Prelamin-A/C OS=Homo sapiens OX=9606 GN=LMNA PE=1 SV=1	6193.06	140.751
sp|P27695|APEX1_HUMAN	86_1	sp|P27695|APEX1_HUMAN	8.15573	NA	35532.2	EGYSGVGLLSR;NAGFTPQER	1;1	2	2	0.0629	11027;7617	-	DNA-(apurinic or apyrimidinic site) lyase OS=Homo sapiens OX=9606 GN=APEX1 PE=1 SV=2	1352.49	75.1384	APEX1	sp|P27695|APEX1_HUMAN	164_1	sp|P27695|APEX1_HUMAN	7.42718	NA	35532.2	EAAGEGPALYEDPPDQK;NAGFTPQER	1;1	2	2	0.0818	24525;7483	-	DNA-(apurinic or apyrimidinic site) lyase OS=Homo sapiens OX=9606 GN=APEX1 PE=1 SV=2	458.591	25.4773
sp|P08865|RSSA_HUMAN	118_1	sp|P08865|RSSA_HUMAN	4.07786	NA	32833.4	FAAATGATPIAGR	1	1	1	0.0441	12977	-	40S ribosomal protein SA OS=Homo sapiens OX=9606 GN=RPSA PE=1 SV=4	1075.82	71.7212	RPSA	sp|P08865|RSSA_HUMAN	230_1	sp|P08865|RSSA_HUMAN	15.833	NA	32833.4	AIVAIENPADVSVISSR;FAAATGATPIAGR;LLVVTDPR;SDGIYIINLK	1;1;1;1	4	6	0.1627	24083;24080;13233;13227;4474;11094	-	40S ribosomal protein SA OS=Homo sapiens OX=9606 GN=RPSA PE=1 SV=4	1959.75	130.65
sp|P34932|HSP74_HUMAN	41_1	sp|P34932|HSP74_HUMAN	2.62098	NA	94271.2	AFSDPFVEAEK	1	1	1	0.0131	13900	-	Heat shock 70 kDa protein 4 OS=Homo sapiens OX=9606 GN=HSPA4 PE=1 SV=4	942.435	16.5339	HSPA4	sp|P34932|HSP74_HUMAN	73_1	sp|P34932|HSP74_HUMAN	35.0556	NA	94271.2	AFSDPFVEAEK;AGGIETIANEYSDR;EDIYAVEIVGGATR;EFSITDVVPYPISLR;ELSTTLNADEAVTR;LEDTENWLYEDGEDQPK;STNEAMEWMNNK;TSTVDLPIENQLLWQIDR;VLATAFDTTLGGR	1;1;1;1;1;1;1;1;1	9	10	0.1524	14344;14343;20680;20636;24038;21142;26456;19880;26754;16864	-	Heat shock 70 kDa protein 4 OS=Homo sapiens OX=9606 GN=HSPA4 PE=1 SV=4	1789.84	31.4007
sp|Q9ULV4|COR1C_HUMAN	150_1	sp|Q9ULV4|COR1C_HUMAN	4.07786	NA	53215.1	VGIVAWHPTAR	1	1	1	0.0232	13068	-	Coronin-1C OS=Homo sapiens OX=9606 GN=CORO1C PE=1 SV=1	468.525	19.5219	CORO1C
sp|P42330|AK1C3_HUMAN	29_1	sp|P42330|AK1C3_HUMAN	2.3325	NA	36829.8	LAIEAGFR	1	1	1	0.0248	3720	sp|P17516|AK1C4_HUMAN;sp|Q04828|AK1C1_HUMAN	Aldo-keto reductase family 1 member C3 OS=Homo sapiens OX=9606 GN=AKR1C3 PE=1 SV=4	1321.73	62.9393	AKR1C3	sp|P42330|AK1C3_HUMAN	54_1	sp|P42330|AK1C3_HUMAN	5.36259	NA	36829.8	LAIEAGFR;TPALIALR	1;1	2	2	0.0495	3610;3048	sp|Q04828|AK1C1_HUMAN	Aldo-keto reductase family 1 member C3 OS=Homo sapiens OX=9606 GN=AKR1C3 PE=1 SV=4	1021.24	48.6304
sp|Q00325|MPCP_HUMAN	157_1	sp|Q00325|MPCP_HUMAN	5.15484	NA	40068.7	IQTQPGYANTLR;TVEALYK	1;1	2	2	0.0525	16509;2295	-	Phosphate carrier protein, mitochondrial OS=Homo sapiens OX=9606 GN=SLC25A3 PE=1 SV=2	2210.42	110.521	SLC25A3	sp|Q00325|MPCP_HUMAN	295_1	sp|Q00325|MPCP_HUMAN	17.3904	NA	40068.7	FGFYEVFK;GSSASLVLK;IQTQPGYANTLR;LPRPPPPEMPESLK;VLYSNMLGEENTYLWR	1;1;1;1;1	5	5	0.163	7991;3238;17897;22277;25969	-	Phosphate carrier protein, mitochondrial OS=Homo sapiens OX=9606 GN=SLC25A3 PE=1 SV=2	1327.41	66.3703
sp|P23528|COF1_HUMAN	91_1	sp|P23528|COF1_HUMAN	5.09434	NA	18490.7	MIYASSK;VFNDMK	1;1	2	2	0.0783	1763;910	sp|Q9Y281|COF2_HUMAN	Cofilin-1 OS=Homo sapiens OX=9606 GN=CFL1 PE=1 SV=3	182.931	15.2442	CFL1	sp|P23528|COF1_HUMAN	170_2	sp|P23528|COF1_HUMAN	22.2656	NA	18490.7	AVLFCLSEDK;EILVGDVGQTVDDPYATFVK;KEDLVFIFWAPESAPLK;MIYASSK;NIILEEGK;NIILEEGKEILVGDVGQTVDDPYATFVK;YALYDATYETK	1;1;1;0;1;1;1	6	7	0.4398	12506;26857;25990;1762;4564;28302;17287;17286	-	Cofilin-1 OS=Homo sapiens OX=9606 GN=CFL1 PE=1 SV=3	3937.75	328.146
sp|P62424|RL7A_HUMAN	76_1	sp|P62424|RL7A_HUMAN	7.11433	NA	29977	VPPAINQFTQALDR;VVNPLFEK	1;1	2	3	0.0827	18917;5527;5526	-	60S ribosomal protein L7a OS=Homo sapiens OX=9606 GN=RPL7A PE=1 SV=2	937.483	62.4989	RPL7A	sp|P62424|RL7A_HUMAN	143_1	sp|P62424|RL7A_HUMAN	2.55024	NA	29977	NFGIGQDIQPK	1	1	1	0.0414	13640	-	60S ribosomal protein L7a OS=Homo sapiens OX=9606 GN=RPL7A PE=1 SV=2	595.563	39.7042
sp|P68032|ACTC_HUMAN	39_1	sp|P68032|ACTC_HUMAN	4.07786	NA	41991.9	AGFAGDDAPR;AVFPSIVGRPR;DLTDYLMK;DSYVGDEAQSK;EITALAPSTMK;IIAPPER;IWHHTFYNELR;SYELPDGQVITIGNER;YPIEHGIITNWDDMEK	0;0;0;0;0;0;0;0;1	1	1	0.2679	6403;6402;12841;7000;7001;12800;12798;12795;12792;12796;12799;12797;12793;12791;12789;12790;12794;11729;1716;1714;18460;18459;20034;20036;20035;20469	sp|P68133|ACTS_HUMAN	Actin, alpha cardiac muscle 1 OS=Homo sapiens OX=9606 GN=ACTC1 PE=1 SV=1	20299.7	882.596	ACTC1	sp|P68032|ACTC_HUMAN	68_1	sp|P68032|ACTC_HUMAN	4.42758	NA	41991.9	AGFAGDDAPR;DLTDYLMK;DSYVGDEAQSK;EITALAPSTMK;HQGVMVGMGQK;IIAPPER;IWHHTFYNELR;SYELPDGQVITIGNER;YPIEHGIITNWDDMEK	0;0;0;0;0;0;0;0;1	1	2	0.2679	6231;6235;6230;6233;6228;6227;6229;6876;6874;13041;11901;11899;12160;1704;1705;1707;1703;21053;21052;24561;24562;24564;24559;24560;24578;25807;25920	sp|P68133|ACTS_HUMAN	Actin, alpha cardiac muscle 1 OS=Homo sapiens OX=9606 GN=ACTC1 PE=1 SV=1	1525.49	66.3255
sp|O00148|DX39A_HUMAN	171_1	sp|O00148|DX39A_HUMAN	2.51202	NA	49098	LTLHGLQQYYVK	1	1	1	0.0281	17915	sp|Q13838|DX39B_HUMAN	ATP-dependent RNA helicase DDX39A OS=Homo sapiens OX=9606 GN=DDX39A PE=1 SV=2	1220.53	46.9436	DDX39A	sp|O00148|DX39A_HUMAN	328_1	sp|O00148|DX39A_HUMAN	5.62738	NA	49098	DFLLKPELLR;GLAITFVSDENDAK	1;1	2	2	0.0562	14505;20398	sp|Q13838|DX39B_HUMAN	ATP-dependent RNA helicase DDX39A OS=Homo sapiens OX=9606 GN=DDX39A PE=1 SV=2	648.252	24.9328
sp|P60709|ACTB_HUMAN	39_2	sp|P60709|ACTB_HUMAN	16.3115	NA	41709.7	AGFAGDDAPR;AVFPSIVGRPR;DLTDYLMK;DSYVGDEAQSK;EITALAPSTMK;GYSFTTTAER;IIAPPER;IWHHTFYNELR;LCYVALDFEQEMATAASSSSLEK;QEYDESGPSIVHR;SYELPDGQVITIGNER;VAPEEHPVLLTEAPLNPK	0;0;0;0;0;1;0;0;1;1;0;1	4	9	0.3973	6403;6402;12841;7000;7001;12800;12798;12795;12792;12796;12799;12797;12793;12791;12789;12790;12794;11729;10892;10891;1716;1714;18460;18459;20979;18473;18471;18472;18297;20034;20036;20035;20458;20455	sp|P63261|ACTG_HUMAN	Actin, cytoplasmic 1 OS=Homo sapiens OX=9606 GN=ACTB PE=1 SV=1	73729.3	3205.62	ACTB
sp|P50990|TCPQ_HUMAN	196_1	sp|P50990|TCPQ_HUMAN	6.98596	NA	59582.5	FAEAFEAIPR;LVPGGGATEIELAK;TAEELMNFSK	1;1;1	3	3	0.062	11398;16373;11931	-	T-complex protein 1 subunit theta OS=Homo sapiens OX=9606 GN=CCT8 PE=1 SV=4	3470.72	86.7681	CCT8	sp|P50990|TCPQ_HUMAN	387_1	sp|P50990|TCPQ_HUMAN	34.4041	NA	59582.5	AIADTGANVVVTGGK;AVDDGVNTFK;DMLEAGILDTYLGK;FAEAFEAIPR;GSTDNLMDDIER;LFVTNDAATILR;LVPGGGATEIELAK;QYGNEVFLAK;TAEELMNFSK	1;1;1;1;1;1;1;1;1	9	10	0.1953	18130;8872;21484;11531;17962;17195;17740;17739;12079;12097	-	T-complex protein 1 subunit theta OS=Homo sapiens OX=9606 GN=CCT8 PE=1 SV=4	3286.94	82.1736
sp|P04406|G3P_HUMAN	211_1	sp|P04406|G3P_HUMAN	20.3893	NA	36030.4	GALQNIIPASTGAAK;LVINGNPITIFQER;VIISAPSADAPMFVMGVNHEK;VIPELNGK;VPTANVSVVDLTCR	1;1;1;1;1	5	7	0.2149	17274;17273;19212;19222;20818;3534;18589	-	Glyceraldehyde-3-phosphate dehydrogenase OS=Homo sapiens OX=9606 GN=GAPDH PE=1 SV=3	10168.7	508.437	GAPDH	sp|P04406|G3P_HUMAN	60_2	sp|P04406|G3P_HUMAN	33.846	NA	36030.4	GALQNIIPASTGAAK;LISWYDNEFGYSNR;LTGMAFR;LVINGNPITIFQER;VIISAPSADAPMFVMGVNHEK;VIPELNGK;VPTANVSVVDLTCR;VVDLMAHMASK;VVDLMAHMASKE;WGDAGAEYVVESTGVFTTMEK	1;1;0;1;1;1;1;1;1;1	9	13	0.3761	18993;18992;18994;24295;1687;22666;22651;22668;27048;3413;21323;13133;17099;27263	-	Glyceraldehyde-3-phosphate dehydrogenase OS=Homo sapiens OX=9606 GN=GAPDH PE=1 SV=3	4744.69	237.234
sp|P29692|EF1D_HUMAN	99_1	sp|P29692|EF1D_HUMAN	12.2336	NA	31102.8	GVVQELQQAISK;IASLEVENQSLR;SLAGSSGPGASSGTSGDHGELVVR	1;1;1	3	3	0.1708	15303;16449;20793	-	Elongation factor 1-delta OS=Homo sapiens OX=9606 GN=EEF1D PE=1 SV=5	2405.73	120.287	EEF1D	sp|P29692|EF1D_HUMAN	189_1	sp|P29692|EF1D_HUMAN	26.5655	NA	31102.8	GVVQELQQAISK;IASLEVENQSLR;QENGASVILR;SIQLDGLVWGASK;SLAGSSGPGASSGTSGDHGELVVR;VGTDLLEEEITK	1;1;1;1;1;1	6	6	0.2954	16251;17830;9560;18157;26948;17532	-	Elongation factor 1-delta OS=Homo sapiens OX=9606 GN=EEF1D PE=1 SV=5	2275.69	113.784
sp|Q8TF72|SHRM3_HUMAN	282_1	sp|Q8TF72|SHRM3_HUMAN	2.11837	NA	216724	SSPATADKR	1	1	1	0.0045	5167	-	Protein Shroom3 OS=Homo sapiens OX=9606 GN=SHROOM3 PE=1 SV=2	13.181	0.113629	SHROOM3
sp|Q9NR30|DDX21_HUMAN	213_1	sp|Q9NR30|DDX21_HUMAN	4.07786	NA	87290.4	GVTFLFPIQAK	1	1	1	0.014	13468	-	Nucleolar RNA helicase 2 OS=Homo sapiens OX=9606 GN=DDX21 PE=1 SV=5	366.915	8.5329	DDX21	sp|Q9NR30|DDX21_HUMAN	122_1	sp|Q9NR30|DDX21_HUMAN	13.6247	NA	87290.4	APQVLVLAPTR;GVTFLFPIQAK;NGIDILVGTPGR;STYEQVDLIGK	1;1;1;1	4	4	0.0575	11993;13775;13495;14784	-	Nucleolar RNA helicase 2 OS=Homo sapiens OX=9606 GN=DDX21 PE=1 SV=5	978.875	22.7645
sp|Q08J23|NSUN2_HUMAN	97_1	sp|Q08J23|NSUN2_HUMAN	4.07786	NA	86415.8	ILLTQENPFFR	1	1	1	0.0143	16774	-	RNA cytosine C(5)-methyltransferase NSUN2 OS=Homo sapiens OX=9606 GN=NSUN2 PE=1 SV=2	894.701	18.6396	NSUN2	sp|Q08J23|NSUN2_HUMAN	187_1	sp|Q08J23|NSUN2_HUMAN	4.42758	NA	86415.8	ILLTQENPFFR	1	1	1	0.0143	18250	-	RNA cytosine C(5)-methyltransferase NSUN2 OS=Homo sapiens OX=9606 GN=NSUN2 PE=1 SV=2	109.227	2.27556
sp|P45880|VDAC2_HUMAN	70_1	sp|P45880|VDAC2_HUMAN	3.03647	NA	31546.5	NNFAVGYR	1	1	1	0.0272	5368	-	Voltage-dependent anion-selective channel protein 2 OS=Homo sapiens OX=9606 GN=VDAC2 PE=1 SV=2	1531.06	95.6911	VDAC2	sp|P45880|VDAC2_HUMAN	130_1	sp|P45880|VDAC2_HUMAN	16.4031	NA	31546.5	LTFDTTFSPNTGK;LTLSALVDGK;NNFAVGYR;YQLDPTASISAK	1;1;1;1	4	7	0.1463	19353;19354;7425;7424;5240;5238;16060	-	Voltage-dependent anion-selective channel protein 2 OS=Homo sapiens OX=9606 GN=VDAC2 PE=1 SV=2	1345.01	84.0633
sp|Q9UQ80|PA2G4_HUMAN	265_1	sp|Q9UQ80|PA2G4_HUMAN	2.39178	NA	43759.2	FDAMPFTLR	1	1	1	0.0228	9869	-	Proliferation-associated protein 2G4 OS=Homo sapiens OX=9606 GN=PA2G4 PE=1 SV=3	426.565	17.7735	PA2G4	sp|Q9UQ80|PA2G4_HUMAN	527_1	sp|Q9UQ80|PA2G4_HUMAN	9.64646	NA	43759.2	AFFSEVER;FTVLLMPNGPMR;ITSGPFEPDLYK	1;1;1	3	3	0.0812	6472;18198;18011	-	Proliferation-associated protein 2G4 OS=Homo sapiens OX=9606 GN=PA2G4 PE=1 SV=3	1054.33	43.9303
sp|Q16531|DDB1_HUMAN	8_1	sp|Q16531|DDB1_HUMAN	9.31983	NA	126887	EMLGGEIIPR;IVVFQYSDGK;QSGESIDIITR	1;1;1	3	3	0.0272	10353;11533;13420	-	DNA damage-binding protein 1 OS=Homo sapiens OX=9606 GN=DDB1 PE=1 SV=1	2742.33	51.7421	DDB1	sp|Q16531|DDB1_HUMAN	12_1	sp|Q16531|DDB1_HUMAN	12.1532	NA	126887	IVVFQYSDGK;LVFSNVNLK;QSGESIDIITR;YLAIAPPIIK	1;1;1;1	4	4	0.0351	11695;7943;13717;9911	-	DNA damage-binding protein 1 OS=Homo sapiens OX=9606 GN=DDB1 PE=1 SV=1	924.413	17.4418
sp|Q04837|SSBP_HUMAN	228_1	sp|Q04837|SSBP_HUMAN	6.51535	NA	17249	SGDSEVYQLGDVSQK;VGQDPVLR	1;1	2	2	0.1554	19194;3879	-	Single-stranded DNA-binding protein, mitochondrial OS=Homo sapiens OX=9606 GN=SSBP1 PE=1 SV=1	1000.65	90.9685	SSBP1	sp|Q04837|SSBP_HUMAN	449_1	sp|Q04837|SSBP_HUMAN	8.85516	NA	17249	IDYGEYMDK;SGDSEVYQLGDVSQK	1;1	2	2	0.1622	11008;22617	-	Single-stranded DNA-binding protein, mitochondrial OS=Homo sapiens OX=9606 GN=SSBP1 PE=1 SV=1	545.585	49.5987
sp|Q9UNX3|RL26L_HUMAN	102_1	sp|Q9UNX3|RL26L_HUMAN	2.15299	NA	17245.6	DDEVQVVR	1	1	1	0.0552	5906	sp|P61254|RL26_HUMAN	60S ribosomal protein L26-like 1 OS=Homo sapiens OX=9606 GN=RPL26L1 PE=1 SV=1	1263.11	140.345	RPL26L1	sp|Q9UNX3|RL26L_HUMAN	194_1	sp|Q9UNX3|RL26L_HUMAN	4.73862	NA	17245.6	FNPFVTSDR;YVIYIER	1;1	2	2	0.1103	9392;5669	sp|P61254|RL26_HUMAN	60S ribosomal protein L26-like 1 OS=Homo sapiens OX=9606 GN=RPL26L1 PE=1 SV=1	998.817	110.98
sp|P25705|ATPA_HUMAN	144_1	sp|P25705|ATPA_HUMAN	16.7076	NA	59713.6	APGIIPR;EAYPGDVFYLHSR;HALIIYDDLSK;TGAIVDVPVGEELLGR;VVDALGNAIDGK	1;1;1;1;1	5	6	0.1067	412;18788;18789;15060;19286;12009	-	ATP synthase subunit alpha, mitochondrial OS=Homo sapiens OX=9606 GN=ATP5F1A PE=1 SV=1	8988.55	249.682	ATP5F1A	sp|P25705|ATPA_HUMAN	265_1	sp|P25705|ATPA_HUMAN	48.2039	NA	59713.6	APGIIPR;AVDSLVPIGR;EAYPGDVFYLHSR;HALIIYDDLSK;ILGADTSVDLEETGR;NVQAEEMVEFSSGLK;QGQYSPMAIEEQVAVIYAGVR;QMSLLLR;STVAQLVK;TGAIVDVPVGEELLGR;TGTAEMSSILEER;TSIAIDTIINQK;VVDALGNAIDGK	1;1;1;1;1;1;1;1;1;1;1;1;1	13	15	0.2893	424;426;7697;7696;21731;15886;22088;23333;27335;3204;2850;22815;19243;16739;12181	-	ATP synthase subunit alpha, mitochondrial OS=Homo sapiens OX=9606 GN=ATP5F1A PE=1 SV=1	5971.8	165.883
sp|P06732|KCRM_HUMAN	183_1	sp|P06732|KCRM_HUMAN	2.39178	NA	43073.9	LGSSEVEQVQLVVDGVK	1	1	2	0.0446	20007;20006	-	Creatine kinase M-type OS=Homo sapiens OX=9606 GN=CKM PE=1 SV=2	2544.62	101.785	CKM	sp|P06732|KCRM_HUMAN	357_1	sp|P06732|KCRM_HUMAN	4.42758	NA	43073.9	LGSSEVEQVQLVVDGVK	1	1	3	0.0446	24523;24522;24530	-	Creatine kinase M-type OS=Homo sapiens OX=9606 GN=CKM PE=1 SV=2	156.484	6.25934
sp|O14950|ML12B_HUMAN	110_1	sp|O14950|ML12B_HUMAN	4.07786	NA	19766.5	GNFNYIEFTR	1	1	1	0.0581	14443	sp|P19105|ML12A_HUMAN	Myosin regulatory light chain 12B OS=Homo sapiens OX=9606 GN=MYL12B PE=1 SV=2	688.802	62.6183	MYL12B	sp|O14950|ML12B_HUMAN	212_1	sp|O14950|ML12B_HUMAN	8.30142	NA	19766.5	DGFIDKEDLHDMLASLGK;FTDEEVDELYR;LNGTDPEDVIR	1;1;1	3	3	0.2326	26077;19057;13976	sp|P19105|ML12A_HUMAN	Myosin regulatory light chain 12B OS=Homo sapiens OX=9606 GN=MYL12B PE=1 SV=2	697.658	63.4234
sp|Q9NTK5|OLA1_HUMAN	266_1	sp|Q9NTK5|OLA1_HUMAN	2.43749	NA	44715.3	LQELSAEER	1	1	1	0.0227	9194	-	Obg-like ATPase 1 OS=Homo sapiens OX=9606 GN=OLA1 PE=1 SV=2	363.951	13.9981	OLA1	sp|Q9NTK5|OLA1_HUMAN	530_1	sp|Q9NTK5|OLA1_HUMAN	2.62779	NA	44715.3	NYIVEDGDIIFFK	1	1	1	0.0328	22038	-	Obg-like ATPase 1 OS=Homo sapiens OX=9606 GN=OLA1 PE=1 SV=2	115.364	4.43709
sp|P04083|ANXA1_HUMAN	280_1	sp|P04083|ANXA1_HUMAN	27.5036	NA	38690	AAYLQETGKPLDETLK;DITSDTSGDFR;GGPGSAVSPYPTFNPSSDVAALHK;GTDVNVFNTILTTR;SEDFGVNEDLADSDAR;SEIDMNDIK;TPAQFDADELR	1;1;1;1;1;1;1	7	8	0.2919	19975;13260;20909;18765;19819;8917;14506;14504	-	Annexin A1 OS=Homo sapiens OX=9606 GN=ANXA1 PE=1 SV=2	17987.6	856.551	ANXA1	sp|P04083|ANXA1_HUMAN	566_1	sp|P04083|ANXA1_HUMAN	50.0049	NA	38690	DITSDTSGDFR;GGPGSAVSPYPTFNPSSDVAALHK;GLGTDEDTLIEILASR;GTDVNVFNTILTTR;GVDEATIIDILTK;KGTDVNVFNTILTTR;LHQAMK;NALLSLAK;QAWFIENEEQEYVQTVK;SEDFGVNEDLADSDAR;SEIDMNDIK;SYPQLR;TPAQFDADELR;VLDLELK	1;1;1;1;1;1;1;1;1;1;1;1;1;1	14	17	0.4595	13509;13510;27462;23714;23715;21688;18482;23459;463;2428;26752;24062;8838;1065;15116;15118;2422	-	Annexin A1 OS=Homo sapiens OX=9606 GN=ANXA1 PE=1 SV=2	5618.9	267.567
sp|P13645|K1C10_HUMAN	9_6	sp|P13645|K1C10_HUMAN	73.7199	NA	58791.7	ADLEMQIESLTEELAYLK;AETECQNTEYQQLLDIK;ALEESNYELEGK;DAEAWFNEK;ELTTEIDNNIEQISSYK;GSLGGGFSSGGFSGGSFSR;HGNSHQGEPR;LAADDFR;LENEIQTYR;LKYENEVALR;NHEEEMK;NHEEEMKDLR;NVQALEIELQSQLALK;QSLEASLAETEGR;QSVEADINGLR;QSVEADINGLRR;SEITELR;SGGGGGGGGCGGGGGVSSLR;SLLEGEGSSGGGGR;SQYEQLAEQNR;VLDELTLTK;VTMQNLNDR;YENEVALR	1;1;1;1;1;1;1;0;1;1;1;1;1;1;1;1;1;1;1;1;1;0;1	21	41	0.4264	20705;20687;16827;16828;16825;16826;10213;20550;19709;19708;19710;10468;1937;11836;11838;11837;13786;13785;4746;15318;20059;16980;12898;12925;12928;12943;12897;16427;16428;2957;18744;14501;14502;16558;16554;16555;16553;7981;7982;7979;9702;10099;10102;10100;9686;9685;9704;6869;6870	-	Keratin, type I cytoskeletal 10 OS=Homo sapiens OX=9606 GN=KRT10 PE=1 SV=6	250745	8955.19	KRT10	sp|P13645|K1C10_HUMAN	16_8	sp|P13645|K1C10_HUMAN	115.081	NA	58791.7	ADLEMQIESLTEELAYLK;ADLEMQIESLTEELAYLKK;AETECQNTEYQQLLDIK;ALEESNYELEGK;DAEAWFNEK;ELTTEIDNNIEQISSYK;GSLGGGFSSGGFSGGSFSR;GSSGGGCFGGSSGGYGGLGGFGGGSFR;IRLENEIQTYR;LAADDFR;LASYLDK;LENEIQTYR;LKYENEVALR;NHEEEMK;NQILNLTTDNANILLQIDNAR;NVQALEIELQSQLALK;NVSTGDVNVEMNAAPGVDLTQLLNNMR;QSLEASLAETEGR;QSVEADINGLR;QSVEADINGLRR;SEITELR;SGGGGGGGGCGGGGGVSSLR;SKELTTEIDNNIEQISSYK;SLLEGEGSSGGGGR;SQYEQLAEQNR;SQYEQLAEQNRK;S…	1;1;1;1;1;1;1;1;1;0;0;1;1;1;1;1;1;1;1;1;1;1;1;1;1;1;1;1;1;0;1	28	94	0.5873	26538;26537;26602;26536;27150;27087;27151;26466;26465;18327;18326;18328;18329;10250;10251;10248;26043;26039;26035;26049;26045;26037;26038;26047;26042;26052;26046;23750;23749;23748;27428;19492;1930;1929;1931;1932;1987;1989;12015;12014;12013;14192;14189;14191;4576;27486;24619;24620;28189;28197;28162;28163;28188;18539;18538;18537;18544;13176;12593;13137;13173;13138;12629;13142;17805;17804;17807;2899…	-	Keratin, type I cytoskeletal 10 OS=Homo sapiens OX=9606 GN=KRT10 PE=1 SV=6	148037	5287.02
sp|P08779|K1C16_HUMAN	9_5	sp|P08779|K1C16_HUMAN	15.2701	NA	51236.2	ALEEANADLEVK;APSTYGGGLSVSSR;ASLENSLEETK;DAETWFLSK;EVASNSELVQSSR;EVFTSSSSSSSR;LAADDFR;LEQEIATYR;VLDELTLAR;VTMQNLNDR	0;1;0;1;1;1;0;0;0;0	4	5	0.222	15340;15341;16068;16067;13458;9842;17173;14438;1937;10600;10601;7905;7906;9702;10099;10102;10100;9686;9685;9704	-	Keratin, type I cytoskeletal 16 OS=Homo sapiens OX=9606 GN=KRT16 PE=1 SV=4	2484.08	70.9736	KRT16	sp|P08779|K1C16_HUMAN	16_5	sp|P08779|K1C16_HUMAN	19.8288	NA	51236.2	ALEEANADLEVK;APSTYGGGLSVSSR;ASLENSLEETK;DAETWFLSK;DYSPYFK;EELAYLR;IIAATIENAQPILQIDNAR;ISSVLAGGSCR;LAADDFR;LASYLDK;LEQEIATYR;QTVEADVNGLR;TEELNKEVASNSELVQSSR;TRLEQEIATYR;VLDELTLAR;VTMQNLNDR	0;1;0;1;0;1;1;0;0;0;0;1;1;0;0;0	6	6	0.3446	16296;16295;17311;13763;13762;9836;4668;4669;4006;26391;10155;10154;1930;1929;1931;1932;1987;1989;10686;10685;13172;26648;4694;7810;7809;10141;9652;10139;9651;10140;9645;9679;9678	-	Keratin, type I cytoskeletal 16 OS=Homo sapiens OX=9606 GN=KRT16 PE=1 SV=4	4624.03	132.115
sp|P02533|K1C14_HUMAN	9_4	sp|P02533|K1C14_HUMAN	6.46965	NA	51529.4	ALEEANADLEVK;APSTYGGGLSVSSSR;ASLENSLEETK;EVATNSELVQSGK;LAADDFR;LEQEIATYR;LLEGEDAHLSSSQFSSGSQSSR;NHEEEMNALR;VLDELTLAR;VTMQNLNDR	0;1;0;0;0;0;1;0;0;0	2	3	0.2479	15340;15341;17475;17476;13458;16498;16499;1937;10600;10601;20884;13962;7905;7906;9702;10099;10102;10100;9686;9685;9704	-	Keratin, type I cytoskeletal 14 OS=Homo sapiens OX=9606 GN=KRT14 PE=1 SV=4	2247.12	64.2034	KRT14	sp|P02533|K1C14_HUMAN	16_6	sp|P02533|K1C14_HUMAN	30.3062	NA	51529.4	ADLEMQIESLKEELAYLK;ALEEANADLEVK;APSTYGGGLSVSSSR;ASLENSLEETK;DAEEWFFTK;DYSPYFK;EELAYLK;EVATNSELVQSGK;GQVGGDVNVEMDAAPGVDLSR;ILTATVDNANVLLQIDNAR;ISSVLAGGSCR;LAADDFR;LASYLDK;LEQEIATYR;LLEGEDAHLSSSQFSSGSQSSR;MSVEADINGLR;TMQNLEIELQSQLSMK;TRLEQEIATYR;VLDELTLAR;VTMQNLNDR;YETELNLR	1;0;1;0;1;0;0;0;1;1;0;0;0;0;1;0;1;0;0;0;1	8	13	0.5	26748;16296;16295;19294;19292;13763;13762;12197;12196;4668;4669;3328;17894;17891;26562;26561;26487;26348;10155;10154;1930;1929;1931;1932;1987;1989;10686;10685;27330;27331;13761;13759;25477;4694;7810;7809;10141;9652;10139;9651;10140;9645;9679;9678;8042	-	Keratin, type I cytoskeletal 14 OS=Homo sapiens OX=9606 GN=KRT14 PE=1 SV=4	3967.65	113.361
sp|P05783|K1C18_HUMAN	9_3	sp|P05783|K1C18_HUMAN	23.6248	NA	48028.5	AQIFANTVDNAR;AQYDELAR;IVLQIDNAR;LAADDFR;LASYLDR;LEAEIATYR;QAQEYEALLNIK;QSVENDIHGLR;YETELAMR	1;1;0;0;1;1;1;1;1	7	8	0.193	15701;15700;6085;8276;8277;1937;2642;8963;17398;14635;7401	-	Keratin, type I cytoskeletal 18 OS=Homo sapiens OX=9606 GN=KRT18 PE=1 SV=2	7602.1	271.504	KRT18	sp|P05783|K1C18_HUMAN	16_2	sp|P05783|K1C18_HUMAN	17.1048	NA	48028.5	AQIFANTVDNAR;AQYDELAR;IVLQIDNAR;LAADDFR;LASYLDR;LQLETEIEALKEELLFMK;QAQEYEALLNIK;QSVENDIHGLR	1;1;0;0;1;1;1;1	6	8	0.1953	16803;5924;5925;8163;8162;8164;8161;1930;1929;1931;1932;2627;26911;19163;18768;15302	-	Keratin, type I cytoskeletal 18 OS=Homo sapiens OX=9606 GN=KRT18 PE=1 SV=2	5559	198.536
sp|Q04695|K1C17_HUMAN	9_2	sp|Q04695|K1C17_HUMAN	4.07786	NA	48076	DAEDWFFSK;EVATNSELVQSGK;LAADDFR;LEQEIATYR;NHEEEMNALR;VLDELTLAR	1;0;0;0;0;0	1	1	0.1319	11198;16498;16499;1937;10600;10601;13962;7905;7906	-	Keratin, type I cytoskeletal 17 OS=Homo sapiens OX=9606 GN=KRT17 PE=1 SV=2	349.018	10.2652	KRT17	sp|Q04695|K1C17_HUMAN	16_4	sp|Q04695|K1C17_HUMAN	4.34236	NA	48076	ALEEANTELEVK;DAEDWFFSK;EELAYLK;EVATNSELVQSGK;LAADDFR;LASYLDK;LEQEIATYR;TRLEQEIATYR;VLDELTLAR	1;1;0;0;0;0;0;0;0	2	2	0.1736	17492;11329;3328;17894;17891;1930;1929;1931;1932;1987;1989;10686;10685;4694;7810;7809	-	Keratin, type I cytoskeletal 17 OS=Homo sapiens OX=9606 GN=KRT17 PE=1 SV=2	551.348	16.2161
sp|P08727|K1C19_HUMAN	9_1	sp|P08727|K1C19_HUMAN	4.07786	NA	44079.1	AALEDTLAETEAR;IVLQIDNAR;LAADDFR;LEQEIATYR;VLDELTLAR	1;0;0;0;0	1	1	0.1175	16964;8276;8277;1937;10600;10601;7905;7906	-	Keratin, type I cytoskeletal 19 OS=Homo sapiens OX=9606 GN=KRT19 PE=1 SV=4	9090.07	275.457	KRT19	sp|P08727|K1C19_HUMAN	16_3	sp|P08727|K1C19_HUMAN	8.85516	NA	44079.1	AALEDTLAETEAR;DAEAWFTSR;EELAYLK;IVLQIDNAR;LAADDFR;LASYLDK;LEQEIATYR;MSVEADINGLR;VLDELTLAR	1;1;0;0;0;0;0;0;0	2	2	0.2025	18522;9388;3328;8163;8162;8164;8161;1930;1929;1931;1932;1987;1989;10686;10685;13761;13759;7810;7809	-	Keratin, type I cytoskeletal 19 OS=Homo sapiens OX=9606 GN=KRT19 PE=1 SV=4	659.213	19.9761
sp|Q06830|PRDX1_HUMAN	54_1	sp|Q06830|PRDX1_HUMAN	17.7075	NA	22096.3	ATAVMPDGQFK;GLFIIDDK;LVQAFQFTDK;QGGLGPMNIPLVSDPK;QITVNDLPVGR	1;1;1;1;1	5	5	0.2814	11792;4872;12738;19270;13217	-	Peroxiredoxin-1 OS=Homo sapiens OX=9606 GN=PRDX1 PE=1 SV=1	8485.92	606.137	PRDX1	sp|Q06830|PRDX1_HUMAN	93_2	sp|Q06830|PRDX1_HUMAN	20.7099	NA	22096.3	ADEGISFR;ATAVMPDGQFK;GLFIIDDK;LVQAFQFTDK;QITVNDLPVGR;TIAQDYGVLK	1;1;1;1;0;1	5	6	0.2915	4022;11970;4711;4710;12994;13466;10214	-	Peroxiredoxin-1 OS=Homo sapiens OX=9606 GN=PRDX1 PE=1 SV=1	5931.62	423.687
sp|P31944|CASPE_HUMAN	80_1	sp|P31944|CASPE_HUMAN	7.11433	NA	27662	DPTAEQFQEELEK;TNPEIQSTLR	1;1	2	2	0.095	18862;11637	-	Caspase-14 OS=Homo sapiens OX=9606 GN=CASP14 PE=1 SV=2	989.94	54.9967	CASP14	sp|P31944|CASPE_HUMAN	153_1	sp|P31944|CASPE_HUMAN	4.42758	NA	27662	EGSEEDLDALEHMFR	1	1	1	0.062	24415	-	Caspase-14 OS=Homo sapiens OX=9606 GN=CASP14 PE=1 SV=2	140.557	7.80871
sp|P12814|ACTN1_HUMAN	63_1	sp|P12814|ACTN1_HUMAN	2.39178	NA	102993	DLLLDPAWEK;EGLLLWCQR;FAIQDISVEETSAK;LASDLLEWIR;TINEVENQILTR;TIPWLENR	0;0;0;0;0;1	1	1	0.0706	12850;12102;18671;13331;17543;17544;7856	-	Alpha-actinin-1 OS=Homo sapiens OX=9606 GN=ACTN1 PE=1 SV=2	854.1	14.235	ACTN1	sp|P12814|ACTN1_HUMAN	110_1	sp|P12814|ACTN1_HUMAN	26.5655	NA	102993	AGTQIENIEEDFR;ALDFIASK;ASIHEAWTDGK;CQLEINFNTLQTK;DLLLDPAWEK;ELPPDQAEYCIAR;ETADTDTADQVMASFK;FAIQDISVEETSAK;GISQEQMNEFR;GYEEWLLNEIR;KHEAFESDLAAHQDR;LAILGIHNEVSK;LVSIGAEEIVDGNVK;TINEVENQILTR;VGWEQLLTTIAR;VLAVNQENEQLMEDYEK	1;0;0;0;0;0;1;0;1;0;0;1;1;0;0;1	6	7	0.2276	21167;3303;3302;13554;13556;22594;13080;13079;21856;21855;21854;23977;21472;21471;17308;19213;24208;16072;21548;19390;19388;18461;26334;26339	-	Alpha-actinin-1 OS=Homo sapiens OX=9606 GN=ACTN1 PE=1 SV=2	2007.17	33.4529
sp|O43707|ACTN4_HUMAN	63_2	sp|O43707|ACTN4_HUMAN	30.5401	NA	104788	AGTQIENIDEDFR;DLLLDPAWEK;DYETATLSDIK;EGLLLWCQR;ETTDTDTADQVIASFK;FAIQDISVEETSAK;LASDLLEWIR;LVSIGAEEIVDGNAK;MAPYQGPDAVPGALDYK;MLDAEDIVNTARPDEK;QFASQANVVGPWIQTK;QGEAEFNR;TINEVENQILTR	1;0;1;0;1;0;0;1;1;1;1;1;0	8	9	0.1833	18375;12850;14296;12102;19831;18671;13331;18448;20047;20115;19967;5661;5664;17543;17544	-	Alpha-actinin-4 OS=Homo sapiens OX=9606 GN=ACTN4 PE=1 SV=2	7196.17	117.97	ACTN4	sp|O43707|ACTN4_HUMAN	110_2	sp|O43707|ACTN4_HUMAN	60.4429	NA	104788	ACLISLGYDVENDR;AGTQIENIDEDFR;ALDFIASK;ASIHEAWTDGK;CQLEINFNTLQTK;DDPVTNLNNAFEVAEK;DLLLDPAWEK;ELPPDQAEYCIAR;ETTDTDTADQVIASFK;FAIQDISVEETSAK;GISQEQMQEFR;GYEEWLLNEIR;ICDQWDALGSLTHSR;ISIEMNGTLEDQLSHLK;KDDPVTNLNNAFEVAEK;KHEAFESDLAAHQDR;LVSIGAEEIVDGNAK;MAPYQGPDAVPGALDYK;MLDAEDIVNTARPDEK;QLEAIDQLHLEYAK;TINEVENQILTR;VEQIAAIAQELNELDYYDSHNVNTR;VGWEQLLTTIAR;VLAVNQENEHLMEDYEK	1;1;0;0;0;1;0;0;1;0;1;0;1;1;1;0;1;1;1;1;0;1;0;1	14	18	0.3578	22805;20900;20899;3303;3302;13554;13556;22594;24402;13080;13079;21856;21855;21854;24091;21472;21471;17660;19213;24254;25600;25604;25433;25432;24208;21037;21038;24585;24768;23360;19390;19388;28199;18461;26378	-	Alpha-actinin-4 OS=Homo sapiens OX=9606 GN=ACTN4 PE=1 SV=2	3041.85	49.8664
sp|Q8N1N4|K2C78_HUMAN	257_1	sp|Q8N1N4|K2C78_HUMAN	2.39178	NA	56830.5	QLEQLQGER	1	1	1	0.0173	9957	-	Keratin, type II cytoskeletal 78 OS=Homo sapiens OX=9606 GN=KRT78 PE=1 SV=2	494.649	14.1328	KRT78	sp|Q8N1N4|K2C78_HUMAN	511_1	sp|Q8N1N4|K2C78_HUMAN	2.36299	NA	56830.5	VDELEAALR	1	1	1	0.0173	7375	-	Keratin, type II cytoskeletal 78 OS=Homo sapiens OX=9606 GN=KRT78 PE=1 SV=2	264.289	7.55111
sp|A0MZ66|SHOT1_HUMAN	164_1	sp|A0MZ66|SHOT1_HUMAN	2.08872	NA	71595.7	LTQQLEEER	1	1	1	0.0143	11265	-	Shootin-1 OS=Homo sapiens OX=9606 GN=SHTN1 PE=1 SV=4	814.747	18.517	SHTN1
sp|P27348|1433T_HUMAN	106_5	sp|P27348|1433T_HUMAN	5.01277	NA	27746.8	AVTEQGAELSNEER;DSTLIMQLLR;EMQPTHPIR;NLLSVAYK;QTIDNSQGAYQEAFDISK;VISSIEQK	1;0;0;0;1;0	2	2	0.2735	18618;12575;13036;10189;4534;20590;4420	-	14-3-3 protein theta OS=Homo sapiens OX=9606 GN=YWHAQ PE=1 SV=1	890.441	49.4689	YWHAQ	sp|P27348|1433T_HUMAN	206_2	sp|P27348|1433T_HUMAN	9.73309	NA	27746.8	DSTLIMQLLR;NLLSVAYK;QTIDNSQGAYQEAFDISK;TAFDEAIAELDTLNEDSYK;YLAEVACGDDR	0;0;1;1;1	3	3	0.2694	13288;12779;13287;4369;26141;26771;15315	-	14-3-3 protein theta OS=Homo sapiens OX=9606 GN=YWHAQ PE=1 SV=1	223.099	12.3944
sp|P63104|1433Z_HUMAN	106_4	sp|P63104|1433Z_HUMAN	12.2336	NA	27727.7	DSTLIMQLLR;EMQPTHPIR;FLIPNASQAESK;NLLSVAYK;SVTEQGAELSNEER;YLAEVAAGDDK	0;0;1;0;1;1	3	4	0.2612	12575;13036;10189;15418;4534;18739;18738;11418	-	14-3-3 protein zeta/delta OS=Homo sapiens OX=9606 GN=YWHAZ PE=1 SV=1	4430.24	233.171	YWHAZ	sp|P63104|1433Z_HUMAN	206_5	sp|P63104|1433Z_HUMAN	22.1379	NA	27727.7	DSTLIMQLLR;FLIPNASQAESK;GIVDQSQQAYQEAFEISK;NLLSVAYK;SVTEQGAELSNEER;TAFDEAIAELDTLSEESYK;YLAEVAAGDDK	0;1;1;0;1;1;1	5	8	0.3755	13288;12779;13287;16403;16402;26280;4369;21640;26709;11571;11569;11568	-	14-3-3 protein zeta/delta OS=Homo sapiens OX=9606 GN=YWHAZ PE=1 SV=1	2334.76	122.882
sp|P30153|2AAA_HUMAN	95_1	sp|P30153|2AAA_HUMAN	4.07786	NA	65266.9	LAGGDWFTSR	1	1	1	0.017	10219	-	Serine/threonine-protein phosphatase 2A 65 kDa regulatory subunit A alpha isoform OS=Homo sapiens OX=9606 GN=PPP2R1A PE=1 SV=4	1463.61	37.5285	PPP2R1A	sp|P30153|2AAA_HUMAN	186_1	sp|P30153|2AAA_HUMAN	11.8227	NA	65266.9	IGPILDNSTLQSEVKPILEK;LAGGDWFTSR;QLSQSLLPAIVELAEDAK;VLELDNVK	1;1;1;1	4	4	0.0951	26981;10258;25576;4972	-	Serine/threonine-protein phosphatase 2A 65 kDa regulatory subunit A alpha isoform OS=Homo sapiens OX=9606 GN=PPP2R1A PE=1 SV=4	1119.64	28.7088
sp|P23246|SFPQ_HUMAN	65_1	sp|P23246|SFPQ_HUMAN	3.03647	NA	76101.6	FGQGGAGPVGGQGPR	1	1	1	0.0212	16128	-	Splicing factor, proline- and glutamine-rich OS=Homo sapiens OX=9606 GN=SFPQ PE=1 SV=2	83.5042	2.60951	SFPQ	sp|P23246|SFPQ_HUMAN	120_1	sp|P23246|SFPQ_HUMAN	4.42758	NA	76101.6	LFVGNLPADITEDEFK	1	1	1	0.0226	24709	-	Splicing factor, proline- and glutamine-rich OS=Homo sapiens OX=9606 GN=SFPQ PE=1 SV=2	52.391	1.63722
sp|P16402|H13_HUMAN	52_1	sp|P16402|H13_HUMAN	12.2336	NA	22336.3	ALAAAGYDVEK;ASGPPVSELITK;SGVSLAALK	1;1;1	3	5	0.1448	10163;10162;12830;12829;2908	sp|P10412|H14_HUMAN;sp|P16403|H12_HUMAN	Histone H1.3 OS=Homo sapiens OX=9606 GN=H1-3 PE=1 SV=2	10350	796.151	H1-3	sp|P16402|H13_HUMAN	91_1	sp|P16402|H13_HUMAN	8.85516	NA	22336.3	ALAAAGYDVEK;SGVSLAALK	1;1	2	3	0.0905	10201;10200;2852	sp|P10412|H14_HUMAN;sp|P16403|H12_HUMAN	Histone H1.3 OS=Homo sapiens OX=9606 GN=H1-3 PE=1 SV=2	2506.92	192.84
sp|P52565|GDIR1_HUMAN	272_1	sp|P52565|GDIR1_HUMAN	3.03647	NA	23192.7	TDYMVGSYGPR	1	1	1	0.0539	14053	-	Rho GDP-dissociation inhibitor 1 OS=Homo sapiens OX=9606 GN=ARHGDIA PE=1 SV=3	1393.29	116.107	ARHGDIA	sp|P52565|GDIR1_HUMAN	552_1	sp|P52565|GDIR1_HUMAN	8.85516	NA	23192.7	AEEYEFLTPVEEAPK;SIQEIQELDKDDESLR	1;1	2	3	0.152	24186;24185;25536	-	Rho GDP-dissociation inhibitor 1 OS=Homo sapiens OX=9606 GN=ARHGDIA PE=1 SV=3	469.452	39.121
sp|P61204|ARF3_HUMAN	3_1	sp|P61204|ARF3_HUMAN	4.07786	NA	20587.7	DAVLLVFANK	1	1	2	0.0552	9673;9674	sp|P84077|ARF1_HUMAN;sp|P84085|ARF5_HUMAN	ADP-ribosylation factor 3 OS=Homo sapiens OX=9606 GN=ARF3 PE=1 SV=2	1162.73	96.8939	ARF3	sp|P61204|ARF3_HUMAN	4_1	sp|P61204|ARF3_HUMAN	20.7099	NA	20587.7	DAVLLVFANK;ILMVGLDAAGK;MLAEDELR;NISFTVWDVGGQDK;TTILYK	1;1;1;1;1	5	7	0.2707	9642;9579;9578;6240;21915;21914;650	sp|P84077|ARF1_HUMAN	ADP-ribosylation factor 3 OS=Homo sapiens OX=9606 GN=ARF3 PE=1 SV=2	1465.51	122.126
sp|Q9Y617|SERC_HUMAN	227_1	sp|Q9Y617|SERC_HUMAN	5.65745	NA	40396.8	ALELNMLSLK;IINNTENLVR	1;1	2	2	0.0541	10886;12445	-	Phosphoserine aminotransferase OS=Homo sapiens OX=9606 GN=PSAT1 PE=1 SV=2	1425.58	52.7992	PSAT1	sp|Q9Y617|SERC_HUMAN	443_1	sp|Q9Y617|SERC_HUMAN	8.39949	NA	40396.8	ASLYNAVTIEDVQK;FGVIFAGAQK;IINNTENLVR	1;1;1	3	3	0.0919	21684;8052;12658	-	Phosphoserine aminotransferase OS=Homo sapiens OX=9606 GN=PSAT1 PE=1 SV=2	756.61	28.0226
sp|P62937|PPIA_HUMAN	36_1	sp|P62937|PPIA_HUMAN	10.2444	NA	18000.9	FEDENFILK;TEWLDGK;VSFELFADK	1;1;1	3	4	0.1515	11503;2969;8654;8653	-	Peptidyl-prolyl cis-trans isomerase A OS=Homo sapiens OX=9606 GN=PPIA PE=1 SV=2	10514.4	751.031	PPIA	sp|P62937|PPIA_HUMAN	64_1	sp|P62937|PPIA_HUMAN	20.0823	NA	18000.9	EGMNIVEAMER;FEDENFILK;IIPGFMCQGGDFTR;TEWLDGK;VNPTVFFDIAVDGEPLGR;VSFELFADK	1;1;1;1;1;1	6	9	0.4121	15615;15616;11655;11653;22450;2907;25714;8585;8584	-	Peptidyl-prolyl cis-trans isomerase A OS=Homo sapiens OX=9606 GN=PPIA PE=1 SV=2	2037.27	145.519
sp|O76003|GLRX3_HUMAN	68_1	sp|O76003|GLRX3_HUMAN	2.43749	NA	37408.2	ENGELLPILR	1	1	1	0.0299	11494	-	Glutaredoxin-3 OS=Homo sapiens OX=9606 GN=GLRX3 PE=1 SV=2	478.648	25.192	GLRX3	sp|O76003|GLRX3_HUMAN	126_1	sp|O76003|GLRX3_HUMAN	2.13626	NA	37408.2	ENGELLPILR	1	1	1	0.0299	11638	-	Glutaredoxin-3 OS=Homo sapiens OX=9606 GN=GLRX3 PE=1 SV=2	166.303	8.7528
sp|Q8N427|TXND3_HUMAN	176_1	sp|Q8N427|TXND3_HUMAN	2.19215	NA	67227.2	FMDAFFPDFK	1	1	1	0.017	14548	-	Thioredoxin domain-containing protein 3 OS=Homo sapiens OX=9606 GN=NME8 PE=2 SV=2	840.819	26.2756	NME8
sp|P51572|BAP31_HUMAN	236_1	sp|P51572|BAP31_HUMAN	2.39178	NA	27974	AENQVLAMR	1	1	1	0.0366	7964	-	B-cell receptor-associated protein 31 OS=Homo sapiens OX=9606 GN=BCAP31 PE=1 SV=3	1000.99	62.5619	BCAP31	sp|P51572|BAP31_HUMAN	467_1	sp|P51572|BAP31_HUMAN	6.48927	NA	27974	LDVGNAEVK;LQAAVDGPMDK	1;1	2	3	0.0813	5340;5338;11346	-	B-cell receptor-associated protein 31 OS=Homo sapiens OX=9606 GN=BCAP31 PE=1 SV=3	761.23	47.5769
sp|O75223|GGCT_HUMAN	287_1	sp|O75223|GGCT_HUMAN	2.19215	NA	20994.3	VSEEIEDIIK	1	1	1	0.0532	12113	-	Gamma-glutamylcyclotransferase OS=Homo sapiens OX=9606 GN=GGCT PE=1 SV=1	849.069	60.6478	GGCT
sp|Q9UHX1|PUF60_HUMAN	51_1	sp|Q9UHX1|PUF60_HUMAN	7.11433	NA	59837.6	LGLPPLTPEQQEALQK;VVAEVYDQER	1;1	2	2	0.0465	19898;13082	-	Poly(U)-binding-splicing factor PUF60 OS=Homo sapiens OX=9606 GN=PUF60 PE=1 SV=1	823.108	29.3967	PUF60	sp|Q9UHX1|PUF60_HUMAN	90_1	sp|Q9UHX1|PUF60_HUMAN	2.67772	NA	59837.6	VVAEVYDQER	1	1	1	0.0179	13334	-	Poly(U)-binding-splicing factor PUF60 OS=Homo sapiens OX=9606 GN=PUF60 PE=1 SV=1	385.849	13.7803
sp|P42765|THIM_HUMAN	231_1	sp|P42765|THIM_HUMAN	6.11439	NA	41897.6	DFTATDLSEFAAK;TPFGAYGGLLK	1;1	2	2	0.0605	17323;10632	-	3-ketoacyl-CoA thiolase, mitochondrial OS=Homo sapiens OX=9606 GN=ACAA2 PE=1 SV=2	1058.66	46.0285	ACAA2	sp|P42765|THIM_HUMAN	459_1	sp|P42765|THIM_HUMAN	5.49057	NA	41897.6	DFTATDLSEFAAK;DGTVTAGNASGVADGAGAVIIASEDAVK	1;1	2	2	0.1033	19063;27765	-	3-ketoacyl-CoA thiolase, mitochondrial OS=Homo sapiens OX=9606 GN=ACAA2 PE=1 SV=2	114.344	4.97148
sp|P09525|ANXA4_HUMAN	230_1	sp|P09525|ANXA4_HUMAN	10.4882	NA	35860.1	AASGFNAMEDAQTLR;AEIDMLDIR;DEGNYLDDALVR	1;1;1	3	3	0.1129	19001;9243;16786	-	Annexin A4 OS=Homo sapiens OX=9606 GN=ANXA4 PE=1 SV=4	2646.79	115.078	ANXA4	sp|P09525|ANXA4_HUMAN	458_1	sp|P09525|ANXA4_HUMAN	25.2583	NA	35860.1	AEIDMLDIR;DEGNYLDDALVR;GLGTDDNTLIR;QDAQDLYEAGEK;SAYFAEK;SDTSFMFQR	1;1;1;1;1;1	6	7	0.1881	9171;18275;12283;12282;18002;2101;10524	-	Annexin A4 OS=Homo sapiens OX=9606 GN=ANXA4 PE=1 SV=4	1972.95	85.7804
sp|P11216|PYGB_HUMAN	141_1	sp|P11216|PYGB_HUMAN	13.1685	NA	96634.5	ILVDVEK;LVTSIGDVVNHDPVVGDR;QAVDQISSGFFSPK;YEFGIFNQK	1;1;1;1	4	4	0.0569	2130;20324;18403;11237	-	Glycogen phosphorylase, brain form OS=Homo sapiens OX=9606 GN=PYGB PE=1 SV=5	5794.25	105.35	PYGB	sp|P11216|PYGB_HUMAN	263_1	sp|P11216|PYGB_HUMAN	58.272	NA	96634.5	DFYELEPEK;EYYDHLPELK;FSAFLEK;GLAGLGDVAEVR;IGEEFLTDLSQLK;IGEEFLTDLSQLKK;IVNGWQVEEADDWLR;LVTSIGDVVNHDPVVGDR;QAVDQISSGFFSPK;TCFETFPDK;VIFLENYR;VLYPNDNFFEGK;WPVSMFEK;YEFGIFNQK	1;1;1;1;1;1;1;1;1;1;1;1;1;1	14	18	0.172	12092;16456;2701;11727;11726;20642;22745;24859;25360;25359;20962;11331;8532;8533;19631;19632;7606;11376	-	Glycogen phosphorylase, brain form OS=Homo sapiens OX=9606 GN=PYGB PE=1 SV=5	4098.87	74.5248
sp|Q92598|HS105_HUMAN	209_1	sp|Q92598|HS105_HUMAN	10.5932	NA	96803.7	DISTTLNADEAVAR;SLDQDPVVR;VLGTAFDPFLGGK	1;1;1	3	3	0.042	18055;7851;15757	-	Heat shock protein 105 kDa OS=Homo sapiens OX=9606 GN=HSPH1 PE=1 SV=1	1688	31.2593	HSPH1	sp|Q92598|HS105_HUMAN	411_2	sp|Q92598|HS105_HUMAN	22.0305	NA	96803.7	AFNDPFIQK;AGGIETIANEFSDR;DISTTLNADEAVAR;LLTETEDWLYEEGEDQAK;QDLPSLDEKPR;VEDVSAVEIVGGATR;VLGTAFDPFLGGK	1;1;0;1;1;1;1	6	7	0.1096	9313;20393;20302;26874;16186;20815;20814;16862	-	Heat shock protein 105 kDa OS=Homo sapiens OX=9606 GN=HSPH1 PE=1 SV=1	1691.17	31.318
sp|Q15366|PCBP2_HUMAN	132_1	sp|Q15366|PCBP2_HUMAN	4.07786	NA	38555.6	IITLAGPTNAIFK	1	1	1	0.0356	16453	-	Poly(rC)-binding protein 2 OS=Homo sapiens OX=9606 GN=PCBP2 PE=1 SV=1	541.263	30.0702	PCBP2	sp|Q15366|PCBP2_HUMAN	233_2	sp|Q15366|PCBP2_HUMAN	2.79599	NA	38555.6	AFAMIIDK;EVGSIIGK;IITLAGPTNAIFK	0;0;1	1	1	0.0795	4395;1838;17833	-	Poly(rC)-binding protein 2 OS=Homo sapiens OX=9606 GN=PCBP2 PE=1 SV=1	361.222	20.0679
sp|Q9NQC3|RTN4_HUMAN	237_1	sp|Q9NQC3|RTN4_HUMAN	3.03647	NA	129851	GPLPAAPPVAPER	1	1	1	0.0109	14718	-	Reticulon-4 OS=Homo sapiens OX=9606 GN=RTN4 PE=1 SV=2	2173.86	45.2888	RTN4	sp|Q9NQC3|RTN4_HUMAN	468_1	sp|Q9NQC3|RTN4_HUMAN	6.48927	NA	129851	GPLPAAPPVAPER;GVIQAIQK	1;1	2	5	0.0176	15430;15428;15429;15431;3084	-	Reticulon-4 OS=Homo sapiens OX=9606 GN=RTN4 PE=1 SV=2	1257.44	26.1966
sp|P21333|FLNA_HUMAN	162_2	sp|P21333|FLNA_HUMAN	124.564	NA	280564	AEAGVPAEFSIWTR;AEFTVETR;AFGPGLQGGSAGSPAR;ANLPQSFQVDTSK;CSGPGLSPGMVR;DVDIIDHHDNTYTVK;EAGAGGLAIAVEGPSK;EATTEFSVDAR;FVPAEMGTHTVSVK;GAGTGGLGLAVEGPSEAK;IVGPSGAAVPCK;LDVQFSGLTK;LIALLEVLSQK;LLGWIQNK;LPQLPITNFSR;LTVSSLQESGLK;LVSIDSK;SPFEVYVDK;SPFSVAVSPSLDLSK;SSFTVDCSK;TFSVWYVPEVTGTHK;TGVAVNKPAEFTVDAK;TPCEEILVK;VANPSGNLTETYVQDR;VAQPTITDNK;VDINTEDLEDGTCR;VEPGLGADNSVVR;VNQPASFAVSLNGAK;VPVHDVTDASK;VTAQGPGLEP…	1;1;1;1;1;1;1;1;1;1;1;1;0;0;1;1;0;1;1;1;1;1;1;1;1;1;1;1;1;1;1;1;1;1;1;1	33	40	0.1723	18621;5728;17535;17598;13369;19995;17499;13549;18339;18924;11535;11534;10169;13596;6258;15012;15013;14496;1068;1069;9457;9456;18622;18623;7914;19863;19421;9625;19907;19906;9548;19361;15547;15548;18350;11878;19462;14961;19825;17087;17086;16790;15111;19142	-	Filamin-A OS=Homo sapiens OX=9606 GN=FLNA PE=1 SV=4	57850.6	401.74	FLNA	sp|P21333|FLNA_HUMAN	311_2	sp|P21333|FLNA_HUMAN	279.628	NA	280564	AEAGVPAEFSIWTR;AEFTVETR;AEISFEDR;AFGPGLQGGSAGSPAR;AHVVPCFDASK;AIVDGNLK;ALTQTGGPHVK;ANLPQSFQVDTSK;ASGPGLNTTGVPASLPVEFTIDAK;AWGPGLEGGVVGK;AYGPGIEPTGNMVK;CSGPGLSPGMVR;DAGEGGLSLAIEGPSK;DAGYGGLSLSIEGPSK;DAPQDFHPDR;DGSCGVAYVVQEPGDYEVSVK;DKGEYTLVVK;DLAEDAPWK;DVDIIDHHDNTYTVK;EAGAGGLAIAVEGPSK;EATTEFSVDAR;EEGPYEVEVTYDGVPVPGSPFPLEAVAPTKPSK;EGPYSISVLYGDEEVPR;ENGVYLIDVK;FADQHVPGSPFSVK;FGGEHVPNSPFQVTALAGDQPSVQ…	1;1;1;1;1;0;1;1;1;1;1;1;1;1;1;1;1;0;1;1;1;1;1;1;1;1;1;1;1;1;1;1;1;1;1;0;0;1;1;1;1;0;1;1;1;1;1;0;1;1;1;1;1;1;1;1;1;1;1;1;1;1;1;1;1;1;1;1;1;1;1;1;1;1;1;1	70	110	0.4337	21386;5588;5587;5950;5951;19379;19378;14040;14039;2409;10235;19474;19510;27427;13938;13937;19457;13661;13660;20781;20780;21681;12999;27209;11587;8233;8232;24503;24505;19320;19319;13900;13897;13901;28405;28406;25486;25488;25487;11506;11504;21054;28243;27674;27673;27672;6996;22006;22007;27811;11606;9927;9926;9928;9925;9923;9922;9929;9932;19073;26074;27878;13949;13948;6095;6094;15826;28064;8411;1510…	-	Filamin-A OS=Homo sapiens OX=9606 GN=FLNA PE=1 SV=4	29972.5	208.142
sp|Q01082|SPTB2_HUMAN	143_1	sp|Q01082|SPTB2_HUMAN	3.03647	NA	274439	ETASELLMR	1	1	1	0.0038	8488	-	Spectrin beta chain, non-erythrocytic 1 OS=Homo sapiens OX=9606 GN=SPTBN1 PE=1 SV=2	2022.35	12.5612	SPTBN1	sp|Q01082|SPTB2_HUMAN	133_1	sp|Q01082|SPTB2_HUMAN	48.4265	NA	274439	DLDDFQSWLSR;ETASELLMR;ETWLSENQR;FESLEPEMNNQASR;FQIQDISVETEDNK;HRPDLIDFDK;IVSSSDVGHDEYSTQSLVK;LAEISDVWEEMK;LEDLEVIQHR;LNDGNEYLFQAK;LTTLELLEVR;QLWGLLIEETEK;SQNIVTDSSSLSAEAIR;VLDNAIETEK	1;1;1;1;1;1;1;1;1;1;1;1;1;1	14	14	0.0715	18323;8407;11911;23143;23297;14894;18028;19797;14773;18983;12697;19962;24424;10955	-	Spectrin beta chain, non-erythrocytic 1 OS=Homo sapiens OX=9606 GN=SPTBN1 PE=1 SV=2	2973.58	18.4694
sp|P00390|GSHR_HUMAN	170_1	sp|P00390|GSHR_HUMAN	4.07786	NA	56220.9	ALLTPVAIAAGR	1	1	2	0.023	11471;11470	-	Glutathione reductase, mitochondrial OS=Homo sapiens OX=9606 GN=GSR PE=1 SV=2	321.968	11.9247	GSR	sp|P00390|GSHR_HUMAN	322_1	sp|P00390|GSHR_HUMAN	9.07878	NA	56220.9	ALLTPVAIAAGR;LNAIYQNNLTK;TSLMIR	1;1;1	3	3	0.0556	11613;16001;366	-	Glutathione reductase, mitochondrial OS=Homo sapiens OX=9606 GN=GSR PE=1 SV=2	1535.3	56.8631
sp|P07814|SYEP_HUMAN	19_1	sp|P07814|SYEP_HUMAN	2.01138	NA	170483	IISLDAK	1	1	1	0.0046	1023	-	Bifunctional glutamate/proline--tRNA ligase OS=Homo sapiens OX=9606 GN=EPRS1 PE=1 SV=5	3357.51	36.8957	EPRS1	sp|P07814|SYEP_HUMAN	33_1	sp|P07814|SYEP_HUMAN	4.42758	NA	170483	SLYDEVAAQGEVVR	1	1	1	0.0093	21434	-	Bifunctional glutamate/proline--tRNA ligase OS=Homo sapiens OX=9606 GN=EPRS1 PE=1 SV=5	519.922	5.71342
sp|O75369|FLNB_HUMAN	162_1	sp|O75369|FLNB_HUMAN	94.5969	NA	277990	AAGSGELGVTMK;AEISCIDNK;AGLAPLEVR;APLNVQFNSPLPGDAVK;APSVATVGSICDLNLK;EAFTNKPNVFTVVTR;FADEHVPGSPFTVK;GAGIGGLGITVEGPSESK;GEAGVPAEFSIWTR;HVGNQQYNVTYVVK;IAGPGLGSGVR;IFFAGDTIPK;IGNLQTDLSDGLR;IPEINSSDMSAHVTSPSGR;LIALLEVLSQK;LLGWIQNK;LPNNHIGISFIPR;LVSIDSK;NTVELLVEDK;SPFEVQVGPEAGMQK;SPFTVGVAAPLDLSK;TATPEIVDNK;TYSVEYLPK;VEPAVDTSR;VFGPGIEGK;VFGPGVER;VLFASQEIPASPFR;VLPTYDASK;VTVLFAGQHISK;VVPCLVTPVTGR;YGGELVP…	1;1;1;1;1;1;1;1;1;1;1;1;1;1;0;0;1;0;1;1;1;1;1;1;1;1;1;1;1;1;1	28	29	0.1437	10540;8483;4990;19932;19412;19768;18585;19313;18509;19434;6602;10202;17107;20524;20523;13596;6258;18095;1068;1069;11668;19149;18333;9584;9930;6291;4415;3292;18854;6881;15307;15266;16153	-	Filamin-B OS=Homo sapiens OX=9606 GN=FLNB PE=1 SV=2	41375.8	283.396	FLNB	sp|O75369|FLNB_HUMAN	311_1	sp|O75369|FLNB_HUMAN	175.422	NA	277990	AAGSGELGVTMK;ADIEMPFDPSK;AEITFDDHK;AGLAPLEVR;AGPGTLSVTIEGPSK;AGSNMLLIGVHGPTTPCEEVSMK;AIVDGNLK;APLNVQFNSPLPGDAVK;APSVATVGSICDLNLK;DAGEGLLAVQITDQEGKPK;DAGYGGISLAVEGPSK;DGTYAVTYIPDK;DLAEDAPWK;DLDIIDNYDYSHTVK;DQEFTVDTR;EAGAGGLSIAVEGPSK;FADEHVPGSPFTVK;FNDEHIPESPYLVPVIAPSDDAR;FVPQEMGVHTVSVK;GAGIGGLGITVEGPSESK;GAGTGGLGLTVEGPCEAK;GEAGVPAEFSIWTR;GLHVVEVTYDDVPIPNSPFK;IAGPGLGSGVR;IFAQDGEGQR;IFFAGDTIPK;IGNLQ…	1;1;1;1;1;1;0;1;1;1;1;1;0;1;1;1;1;1;1;1;1;1;1;1;1;1;1;1;1;0;0;1;0;1;1;0;1;1;1;1;1;1;1;1;1;1;1;1;1;1;1	45	55	0.2548	10606;14673;14671;9161;4860;4858;19016;27613;2409;24327;24328;23062;23063;25871;21159;17407;8233;8232;24725;10285;19637;19638;21316;27869;21805;22850;23384;21140;27100;6464;6465;10610;10239;18743;18742;26318;9984;13949;13948;6095;6094;16443;1043;26306;11842;25351;24302;22507;7147;7146;20818;8169;17433;19999;9930;22765;4252;4251;3192;12255;16193;16194;6722;17418	-	Filamin-B OS=Homo sapiens OX=9606 GN=FLNB PE=1 SV=2	21137.2	144.776
sp|Q15149|PLEC_HUMAN	220_1	sp|Q15149|PLEC_HUMAN	10.2833	NA	531466	APVPASELLASGVLSR;LTAEDLFEAR;QEQALLEEIER;VLALPEPSPAAPTLR	1;1;1;1	4	4	0.0111	18896;11797;16441;18609	-	Plectin OS=Homo sapiens OX=9606 GN=PLEC PE=1 SV=3	1553.44	4.55553	PLEC	sp|Q15149|PLEC_HUMAN	431_1	sp|Q15149|PLEC_HUMAN	11.138	NA	531466	AQVEQELTTLR;LTAEDLFEAR;QEQALLEEIER	1;1;1	3	3	0.0068	15885;11983;17792	-	Plectin OS=Homo sapiens OX=9606 GN=PLEC PE=1 SV=3	810.95	2.37815
sp|Q8WXG6|MADD_HUMAN	30_1	sp|Q8WXG6|MADD_HUMAN	2.28179	NA	183188	LAGSPIR	1	1	1	0.0043	231	-	MAP kinase-activating death domain protein OS=Homo sapiens OX=9606 GN=MADD PE=1 SV=2	510.941	6.23098	MADD
sp|P10809|CH60_HUMAN	148_1	sp|P10809|CH60_HUMAN	26.859	NA	61016.4	EIGNIISDAMK;GYISPYFINTSK;ISSIQSIVPALEIANAHR;LVQDVANNTNEEAGDGTTTATVLAR;NAGVEGSLIVEK;VGGTSDVEVNEK;VGLQVVAVK	1;1;1;1;1;1;1	7	7	0.1728	12593;16970;20387;20983;13327;13729;4640	-	60 kDa heat shock protein, mitochondrial OS=Homo sapiens OX=9606 GN=HSPD1 PE=1 SV=2	8544.28	237.341	HSPD1	sp|P10809|CH60_HUMAN	278_1	sp|P10809|CH60_HUMAN	46.5963	NA	61016.4	APGFGDNR;CEFQDAYVLLSEK;EIGNIISDAMK;IQEIIEQLDVTTSEYEK;LSDGVAVLK;NAGVEGSLIVEK;TLNDELEIIEGMK;TVIIEQSWGSPK;VGEVIVTK;VGGTSDVEVNEK;VGLQVVAVK	1;1;1;1;1;1;1;1;1;1;1	11	16	0.2164	2522;22479;12804;26261;4212;13610;13611;20864;20863;21156;17475;17474;2818;14127;4478;4477	-	60 kDa heat shock protein, mitochondrial OS=Homo sapiens OX=9606 GN=HSPD1 PE=1 SV=2	5345.22	148.478
sp|Q14247|SRC8_HUMAN	124_1	sp|Q14247|SRC8_HUMAN	9.09063	NA	61548.5	FGVQSER;LPSSPVYEDAASFK;SAVGFEYQGK	1;1;1	3	3	0.0564	2272;18401;9516	-	Src substrate cortactin OS=Homo sapiens OX=9606 GN=CTTN PE=1 SV=2	1965.27	65.5091	CTTN	sp|Q14247|SRC8_HUMAN	241_1	sp|Q14247|SRC8_HUMAN	10.2771	NA	61548.5	LPSSPVYEDAASFK;SAVGFDYQGK;YGLFPANYVELR	1;1;1	3	3	0.0655	20959;9022;19627	-	Src substrate cortactin OS=Homo sapiens OX=9606 GN=CTTN PE=1 SV=2	1167.25	38.9082
sp|O60664|PLIN3_HUMAN	234_1	sp|O60664|PLIN3_HUMAN	4.07786	NA	47045.9	SVVTGGVQSVMGSR	1	1	1	0.0323	16535	-	Perilipin-3 OS=Homo sapiens OX=9606 GN=PLIN3 PE=1 SV=3	620.972	20.6991	PLIN3
sp|P08758|ANXA5_HUMAN	153_1	sp|P08758|ANXA5_HUMAN	5.01277	NA	35914.4	SEIDLFNIR;VLTEIIASR	1;1	2	2	0.0563	10123;7112	-	Annexin A5 OS=Homo sapiens OX=9606 GN=ANXA5 PE=1 SV=2	5019.72	193.066	ANXA5	sp|P08758|ANXA5_HUMAN	285_1	sp|P08758|ANXA5_HUMAN	33.8255	NA	35914.4	ETSGNLEQLLLAVVK;FITIFGTR;GAGTDDHTLIR;GLGTDEESILTLLTSR;GTVTDFPGFDER;QEISAAFK;QVYEEEYGSSLEDDVVGDTSGYYQR;SEIDLFNIR;VLTEIIASR	1;1;1;1;1;1;1;1;1	9	10	0.3531	22652;5634;5633;11682;23736;17342;4009;28185;10160;6995	-	Annexin A5 OS=Homo sapiens OX=9606 GN=ANXA5 PE=1 SV=2	4542.78	174.722
sp|P10599|THIO_HUMAN	59_1	sp|P10599|THIO_HUMAN	7.11433	NA	11729.7	TAFQEALDAAGDK;VGEFSGANK	1;1	2	2	0.2095	16028;4538	-	Thioredoxin OS=Homo sapiens OX=9606 GN=TXN PE=1 SV=3	1128.17	161.167	TXN	sp|P10599|THIO_HUMAN	98_1	sp|P10599|THIO_HUMAN	4.42758	NA	11729.7	TAFQEALDAAGDK	1	1	1	0.1238	17267	-	Thioredoxin OS=Homo sapiens OX=9606 GN=TXN PE=1 SV=3	127.938	18.2768
sp|P24534|EF1B_HUMAN	247_1	sp|P24534|EF1B_HUMAN	5.22862	NA	24748.3	SIQADGLVWGSSK;SPAGLQVLNDYLADK	1;1	2	2	0.1244	16244;19151	-	Elongation factor 1-beta OS=Homo sapiens OX=9606 GN=EEF1B2 PE=1 SV=3	1971.62	140.83	EEF1B2	sp|P24534|EF1B_HUMAN	494_1	sp|P24534|EF1B_HUMAN	14.8544	NA	24748.3	LVPVGYGIK;SIQADGLVWGSSK;SPAGLQVLNDYLADK;SSILLDVKPWDDETDMAK	1;1;1;1	4	4	0.2444	5400;17561;22512;26385	-	Elongation factor 1-beta OS=Homo sapiens OX=9606 GN=EEF1B2 PE=1 SV=3	1335.13	95.3667
sp|P31942|HNRH3_HUMAN	192_1	sp|P31942|HNRH3_HUMAN	2.3325	NA	36903.1	EIAENALGK	1	1	1	0.026	5475	-	Heterogeneous nuclear ribonucleoprotein H3 OS=Homo sapiens OX=9606 GN=HNRNPH3 PE=1 SV=2	1037.73	51.8864	HNRNPH3	sp|P31942|HNRH3_HUMAN	379_1	sp|P31942|HNRH3_HUMAN	2.21929	NA	36903.1	YIEIFR	1	1	1	0.0173	2692	-	Heterogeneous nuclear ribonucleoprotein H3 OS=Homo sapiens OX=9606 GN=HNRNPH3 PE=1 SV=2	364.826	18.2413
sp|Q12905|ILF2_HUMAN	215_1	sp|Q12905|ILF2_HUMAN	4.07786	NA	43035.2	ILPTLEAVAALGNK	1	1	1	0.0359	17235	-	Interleukin enhancer-binding factor 2 OS=Homo sapiens OX=9606 GN=ILF2 PE=1 SV=2	879.133	41.8635	ILF2	sp|Q12905|ILF2_HUMAN	415_1	sp|Q12905|ILF2_HUMAN	7.65318	NA	43035.2	ILITTVPPNLR;VKPAPDETSFSEALLK;VLQSALAAIR	1;1;1	3	3	0.0949	14260;24005;8168	-	Interleukin enhancer-binding factor 2 OS=Homo sapiens OX=9606 GN=ILF2 PE=1 SV=2	1811.45	86.2594
sp|O14979|HNRDL_HUMAN	232_1	sp|O14979|HNRDL_HUMAN	2.62098	NA	46409.1	DLTEYLSR	1	1	1	0.019	6958	-	Heterogeneous nuclear ribonucleoprotein D-like OS=Homo sapiens OX=9606 GN=HNRNPDL PE=1 SV=3	417.014	17.3756	HNRNPDL	sp|O14979|HNRDL_HUMAN	79_2	sp|O14979|HNRDL_HUMAN	2.9996	NA	46409.1	DLTEYLSR;FGEVVDCTIK;GFGFVLFK	1;0;0	1	1	0.0619	6839;12053;4518	-	Heterogeneous nuclear ribonucleoprotein D-like OS=Homo sapiens OX=9606 GN=HNRNPDL PE=1 SV=3	370.146	15.4227
sp|P46781|RS9_HUMAN	285_1	sp|P46781|RS9_HUMAN	4.07786	NA	22577.6	LDYILGLK	1	1	1	0.0412	5244	-	40S ribosomal protein S9 OS=Homo sapiens OX=9606 GN=RPS9 PE=1 SV=3	613.891	43.8493	RPS9	sp|P46781|RS9_HUMAN	572_1	sp|P46781|RS9_HUMAN	7.36122	NA	22577.6	ELLTLDEK;IGVLDEGK;QVVNIPSFIVR	1;1;1	3	3	0.1392	5799;2439;15436	-	40S ribosomal protein S9 OS=Homo sapiens OX=9606 GN=RPS9 PE=1 SV=3	1596.07	114.005
sp|P00558|PGK1_HUMAN	93_1	sp|P00558|PGK1_HUMAN	17.3066	NA	44586.1	AGGFLMK;ALMDEVVK;ITLPVDFVTADK;LGDVYVNDAFGTAHR;YSLEPVAVELK	1;1;1;1;1	5	7	0.1271	402;4439;15676;15677;19351;14110;14109	-	Phosphoglycerate kinase 1 OS=Homo sapiens OX=9606 GN=PGK1 PE=1 SV=3	11634.5	387.815	PGK1	sp|P00558|PGK1_HUMAN	179_1	sp|P00558|PGK1_HUMAN	48.6459	NA	44586.1	ACANPAAGSVILLENLR;AGGFLMK;AHSSMVGVNLPQK;ALESPERPFLAILGGAK;ALMDEVVK;ELNYFAK;ITLPVDFVTADK;LGDVYVNDAFGTAHR;VDFNVPMK;VLNNMEIGTSLFDEEGAK;VSHVSTGGGASLELLEGK;YSLEPVAVELK	1;1;1;1;1;1;1;1;1;1;1;1	12	15	0.3621	24346;24347;416;18037;24349;4276;4275;3775;16785;22924;5493;25861;24077;24076;14641	-	Phosphoglycerate kinase 1 OS=Homo sapiens OX=9606 GN=PGK1 PE=1 SV=3	7173.81	239.127
sp|P38646|GRP75_HUMAN	74_1	sp|P38646|GRP75_HUMAN	24.4672	NA	73634.8	EQQIVIQSSGGLSK;NAVITVPAYFNDSQR;NTTIPTK;QAASSLQQASLK;SDIGEVILVGGMTR;VINEPTAAALAYGLDK;VQQTVQDLFGR	1;1;0;1;1;1;1	6	7	0.1311	18023;19664;19663;1273;13690;17742;19419;15118	-	Stress-70 protein, mitochondrial OS=Homo sapiens OX=9606 GN=HSPA9 PE=1 SV=2	6716.66	156.201	HSPA9	sp|P38646|GRP75_HUMAN	537_1	sp|P38646|GRP75_HUMAN	52.1125	NA	73634.8	AQFEGIVTDLIR;DAGQISGLNVLR;DDIENMVK;EQQIVIQSSGGLSK;LFEMAYK;NAVITVPAYFNDSQR;QAVTNPNNTFYATK;SDIGEVILVGGMTR;STNGDTFLGGEDFDQALLR;TTPSVVAFTADGER;VEAVNMAEGIIHDTETK;VINEPTAAALAYGLDK;VQQTVQDLFGR	1;1;1;1;1;1;1;1;1;1;1;1;1	13	17	0.2548	17902;14443;5868;20268;4175;23641;21972;21971;19744;19743;26359;26358;19831;25086;14678;23079;15968	-	Stress-70 protein, mitochondrial OS=Homo sapiens OX=9606 GN=HSPA9 PE=1 SV=2	5084.48	118.244
sp|P34931|HS71L_HUMAN	74_2	sp|P34931|HS71L_HUMAN	3.03647	NA	70331.3	AKIHDIVLVGGSTR;ATAGDTHLGGEDFDNR;DAGVIAGLNVLR;IINEPTAAAIAYGLDK;ITITNDK;NALESYAFNMK;TTPSYVAFTDTER;VEIIANDQGNR	1;0;0;0;0;0;0;0	1	1	0.156	17948;19575;19574;12782;19505;19504;1885;15044;18185;18186;13624	-	Heat shock 70 kDa protein 1-like OS=Homo sapiens OX=9606 GN=HSPA1L PE=1 SV=2	464.487	11.9099	HSPA1L	sp|P34931|HS71L_HUMAN	140_1	sp|P34931|HS71L_HUMAN	2.62779	NA	70331.3	AKIHDIVLVGGSTR;ATAGDTHLGGEDFDNR;DAGVIAGLNVLR;DNNLLGR;IINEPTAAAIAYGLDK;ITITNDK;NALESYAFNMK;TTPSYVAFTDTER;VEIIANDQGNR	1;0;0;0;0;0;0;0;0	1	2	0.1669	20114;20115;23406;23407;23408;13039;13038;1802;1800;23253;23252;1876;15861;16366;20524;20525;13984;13994;13986;13987;13989;13981;13980;13988;13992;13993;13990;14017;13991;13978;13977;14015	-	Heat shock 70 kDa protein 1-like OS=Homo sapiens OX=9606 GN=HSPA1L PE=1 SV=2	628.386	16.1125
sp|P0DMV8|HS71A_HUMAN	74_3	sp|P0DMV8|HS71A_HUMAN	26.5559	NA	70009	ATAGDTHLGGEDFDNR;DAGVIAGLNVLR;FGDPVVQSDMK;HWPFQVINDGDKPK;IINEPTAAAIAYGLDR;ITITNDK;LLQDFFNGR;NALESYAFNMK;NQVALNPQNTVFDAK;SAVEDEGLK;STLEPVEK;TTPSYVAFTDTER;VEIIANDQGNR	0;0;1;1;1;0;1;0;1;1;1;0;0	7	11	0.2371	19575;19574;12782;13878;13501;19599;19629;1885;10246;10228;10244;15044;19499;19498;5572;4386;18185;18186;13624	-	Heat shock 70 kDa protein 1A OS=Homo sapiens OX=9606 GN=HSPA1A PE=1 SV=1 >sp|P0DMV9|HS71B_HUMAN Heat shock 70 kDa protein 1B OS=Homo sapiens OX=9606 GN=HSPA1B PE=1 SV=1	4779.42	132.762	HSPA1A	sp|P0DMV8|HS71A_HUMAN	140_2	sp|P0DMV8|HS71A_HUMAN	35.4206	NA	70009	ATAGDTHLGGEDFDNR;DAGVIAGLNVLR;DNNLLGR;ELEQVCNPIISGLYQGAGGPGPGGFGAQGPK;FEELCSDLFR;FGDPVVQSDMK;HWPFQVINDGDKPK;IINEPTAAAIAYGLDR;ITITNDK;LLQDFFNGR;LVNHFVEEFK;NALESYAFNMK;NQVALNPQNTVFDAK;TTPSYVAFTDTER;VEIIANDQGNR	0;0;0;1;1;1;1;1;0;1;1;0;1;0;0	8	16	0.3011	23406;23407;23408;13039;13038;1802;1800;28297;16671;16672;13821;14309;10624;23557;23558;1876;10295;10277;10276;10297;10294;15083;15861;16366;23241;23242;20524;20525;13984;13994;13986;13987;13989;13981;13980;13988;13992;13993;13990;14017;13991;13978;13977;14015	-	Heat shock 70 kDa protein 1A OS=Homo sapiens OX=9606 GN=HSPA1A PE=1 SV=1 >sp|P0DMV9|HS71B_HUMAN Heat shock 70 kDa protein 1B OS=Homo sapiens OX=9606 GN=HSPA1B PE=1 SV=1	4721.16	131.143
sp|P11021|BIP_HUMAN	74_4	sp|P11021|BIP_HUMAN	48.7686	NA	72288.4	DAGTIAGLNVMR;ELEEIVQPIISK;FEELNMDLFR;IINEPTAAAIAYGLDK;ITITNDQNR;ITPSYVAFTPEGER;NELESYAYSLK;NQLTSNPENTVFDAK;SDIDEIVLVGGSTR;SQIFSTASDNQPTVTIK;TKPYIQVDIGGGQTK;TWNDPSVQQDIK;VEIIANDQGNR;VLEDSDLK;VTHAVVTVPAYFNDAQR	1;1;1;0;1;1;1;1;1;1;1;1;0;1;1	13	19	0.2951	13386;17067;17068;15555;19505;19504;9197;18887;18888;15623;19587;19586;17889;17888;20168;9064;17547;17546;13624;4810;20316;20315	-	Endoplasmic reticulum chaperone BiP OS=Homo sapiens OX=9606 GN=HSPA5 PE=1 SV=2	26089.5	668.961	HSPA5	sp|P11021|BIP_HUMAN	140_3	sp|P11021|BIP_HUMAN	91.1018	NA	72288.4	ALSSQHQAR;DAGTIAGLNVMR;DNHLLGTFDLTGIPPAPR;ELEEIVQPIISK;ETAEAYLGK;FEELNMDLFR;IEIESFYEGEDFSETLTR;IEWLESHQDADIEDFK;IINEPTAAAIAYGLDK;IINEPTAAAIAYGLDKR;ITITNDQNR;ITPSYVAFTPEGER;KSDIDEIVLVGGSTR;LTPEEIER;LYGSAGPPPTGEEDTAEK;NELESYAYSLK;NQLTSNPENTVFDAK;SDIDEIVLVGGSTR;TFAPEEISAMVLTK;TWNDPSVQQDIK;VEIIANDQGNR;VLEDSDLK;VTHAVVTVPAYFNDAQR	1;1;1;1;1;1;1;1;0;1;1;1;1;1;1;1;1;1;1;1;0;1;1	21	38	0.4174	6852;13682;25637;25638;25643;25636;18674;18675;6386;6385;6387;16617;26851;25903;25912;23253;23252;24766;9140;21934;21935;22295;22296;6536;6535;24778;16712;23442;23443;23457;20012;20011;21453;19396;19397;13984;13994;13986;13987;13989;13981;13980;13988;13992;13993;13990;14017;13991;13978;13977;14015;4643;4641;4650;25324;25323	-	Endoplasmic reticulum chaperone BiP OS=Homo sapiens OX=9606 GN=HSPA5 PE=1 SV=2	12438.8	318.944
sp|P11142|HSP7C_HUMAN	74_5	sp|P11142|HSP7C_HUMAN	50.4061	NA	70854.2	CNEIINWLDK;DAGTIAGLNVLR;EIAEAYLGK;FDDAVVQSDMK;GTLDPVEK;HWPFMVVNDAGRPK;IINEPTAAAIAYGLDK;IINEPTAAAIAYGLDKK;ITITNDK;LLQDFFNGK;MVNHFIAEFK;NQVAMNPTNTVFDAK;NSLESYAFNMK;NTTIPTK;SQIHDIVLVGGSTR;STAGDTHLGGEDFDNR;TTPSYVAFTDTER;TVTNAVVTVPAYFNDSQR;VEIIANDQGNR;VQVEYK	1;1;1;1;1;1;0;1;0;1;1;1;1;0;1;1;0;1;0;1	15	24	0.3375	15408;12858;6884;14678;3220;19467;19505;19504;20022;1885;9431;9434;9395;13807;14203;19439;19527;19526;19438;15381;15380;1273;18136;19639;18185;18186;20518;20517;13624;1133;1131	-	Heat shock cognate 71 kDa protein OS=Homo sapiens OX=9606 GN=HSPA8 PE=1 SV=1	25819.6	697.826	HSPA8	sp|P11142|HSP7C_HUMAN	140_4	sp|P11142|HSP7C_HUMAN	81.3657	NA	70854.2	CNEIINWLDK;DAGTIAGLNVLR;DNNLLGK;EIAEAYLGK;FDDAVVQSDMK;FEELNADLFR;FELTGIPPAPR;IINEPTAAAIAYGLDK;IINEPTAAAIAYGLDKK;ITITNDK;LLQDFFNGK;MKEIAEAYLGK;MVNHFIAEFK;NQVAMNPTNTVFDAK;NSLESYAFNMK;QTQTFTTYSDNQPGVLIQVYEGER;SINPDEAVAYGAAVQAAILSGDK;SQIHDIVLVGGSTR;STAGDTHLGGEDFDNR;TTPSYVAFTDTER;TVTNAVVTVPAYFNDSQR;VCNPIITK;VEIIANDQGNR;VQVEYK	1;1;1;1;1;1;1;0;1;0;1;1;1;1;1;1;1;1;1;0;1;1;0;1	20	39	0.4241	16389;13085;13084;1238;1237;6772;14842;15371;14841;14824;14825;13034;13033;23253;23252;24540;1876;9371;9400;9398;9399;14798;14213;23120;23298;23119;23299;16356;16359;28081;27218;20445;20444;23593;23587;23591;23589;23588;20524;20525;25942;25945;5349;13984;13994;13986;13987;13989;13981;13980;13988;13992;13993;13990;14017;13991;13978;13977;14015;1101	-	Heat shock cognate 71 kDa protein OS=Homo sapiens OX=9606 GN=HSPA8 PE=1 SV=1	13886.5	375.309
sp|P11413|G6PD_HUMAN	151_1	sp|P11413|G6PD_HUMAN	13.1873	NA	59219	GGYFDEFGIIR;IFGPIWNR;LSNHISSLFR;QSEPFFK	1;1;1;1	4	4	0.0699	14746;7137;12075;3844	-	Glucose-6-phosphate 1-dehydrogenase OS=Homo sapiens OX=9606 GN=G6PD PE=1 SV=4	5505.84	144.891	G6PD	sp|P11413|G6PD_HUMAN	280_1	sp|P11413|G6PD_HUMAN	44.796	NA	59219	DGLLPENTFIVGYAR;GGYFDEFGIIR;GPTEADELMK;GYLDDPTVPR;IIVEKPFGR;KPGMFFNPEESELDLTYGNR;LKLEDFFAR;LTVADIR;NSYVAGQYDDAASYQR;QSEPFFK;VGFQYEGTYK;WDGVPFILR	1;1;1;1;1;1;1;1;1;1;1;1	12	14	0.2583	23291;15471;9646;10992;10991;8674;27435;27434;11188;1537;24700;3733;12830;10043	-	Glucose-6-phosphate 1-dehydrogenase OS=Homo sapiens OX=9606 GN=G6PD PE=1 SV=4	3555.78	93.5731
sp|P31943|HNRH1_HUMAN	145_1	sp|P31943|HNRH1_HUMAN	4.07786	NA	49198.4	HTGPNSPDTANDGFVR;VHIEIGPDGR	1;0	1	1	0.0579	19619;9749	sp|P55795|HNRH2_HUMAN	Heterogeneous nuclear ribonucleoprotein H OS=Homo sapiens OX=9606 GN=HNRNPH1 PE=1 SV=4	99.9568	3.99827	HNRNPH1	sp|P31943|HNRH1_HUMAN	267_1	sp|P31943|HNRH1_HUMAN	4.42758	NA	49198.4	STGEAFVQFASQEIAEK;VHIEIGPDGR	1;0	1	1	0.0601	24969;9728;9729;9730	sp|P55795|HNRH2_HUMAN	Heterogeneous nuclear ribonucleoprotein H OS=Homo sapiens OX=9606 GN=HNRNPH1 PE=1 SV=4	125.3	5.01199
sp|Q09666|AHNK_HUMAN	258_1	sp|Q09666|AHNK_HUMAN	8.15573	NA	628699	ADIDVSGPK;GEGPDVDVNLPK	1;1	2	2	0.0036	4346;13906	-	Neuroblast differentiation-associated protein AHNAK OS=Homo sapiens OX=9606 GN=AHNAK PE=1 SV=2	875.238	2.11922	AHNAK	sp|Q09666|AHNK_HUMAN	516_1	sp|Q09666|AHNK_HUMAN	89.3925	NA	628699	DIDISSPEFK;FSMPGFK;FSVPGFK;GDMDVSVPK;GDVDVSLPK;GEGPDVDVNLPK;GEGPEVDVNLPK;IDVDAPDIDIHGPDAK;IDVTAPDVSIEEPEGK;ISAPNVDFNLEGPK;ISMPDFDLHLK;ISMPDVDFNLK;ISMPDVDLHLK;ISMPEVDLNLK;ISMQDVDLSLGSPK;LNVGAPDVTLR;MDIDVPDVEVQGPDWHLK;MDVNVGDIDIEGPEGK;TDVDVSLPK;VDIEGPDVNIEGPEGK;VDIETPNLEGTLTGPR;VDTNAPDLSLEGPEGK;VDVDVPDVNIEGPDAK;VDVEVPDVSLEGPEGK;VGVEVPDVNIEGPEGK;VTAPDVDLHLK	1;1;1;1;1;1;1;1;1;1;1;1;1;1;1;1;1;1;1;1;1;1;1;1;1;1	26	33	0.0562	11525;2046;2045;2044;1403;5424;4959;4958;14353;14352;14829;14830;10828;23675;20783;16680;15633;15305;15306;14988;20570;11673;26525;23548;6149;23322;23806;23021;23484;23483;23338;22979;13358	-	Neuroblast differentiation-associated protein AHNAK OS=Homo sapiens OX=9606 GN=AHNAK PE=1 SV=2	23081.1	55.8864
sp|P31939|PUR9_HUMAN	276_1	sp|P31939|PUR9_HUMAN	5.65745	NA	64575.3	TGLVEFAR;TLTPISAAYAR	1;1	2	2	0.0321	4122;11775	-	Bifunctional purine biosynthesis protein PURH OS=Homo sapiens OX=9606 GN=ATIC PE=1 SV=3	1378.85	37.2663	ATIC	sp|P31939|PUR9_HUMAN	557_1	sp|P31939|PUR9_HUMAN	14.0238	NA	64575.3	ALFEEVPELLTEAEK;DVSELTGFPEMLGGR;LDFNLIR;TGLVEFAR	1;1;1;1	4	4	0.076	23873;22580;3944;3984	-	Bifunctional purine biosynthesis protein PURH OS=Homo sapiens OX=9606 GN=ATIC PE=1 SV=3	756.147	20.4364
sp|P50914|RL14_HUMAN	241_1	sp|P50914|RL14_HUMAN	4.07786	NA	23417	LVAIVDVIDQNR	1	1	1	0.0558	16374	-	60S ribosomal protein L14 OS=Homo sapiens OX=9606 GN=RPL14 PE=1 SV=4	939.435	78.2863	RPL14	sp|P50914|RL14_HUMAN	476_1	sp|P50914|RL14_HUMAN	4.42758	NA	23417	LVAIVDVIDQNR	1	1	2	0.0558	17741;17742	-	60S ribosomal protein L14 OS=Homo sapiens OX=9606 GN=RPL14 PE=1 SV=4	117.493	9.79109
sp|Q13813|SPTN1_HUMAN	172_1	sp|Q13813|SPTN1_HUMAN	20.9364	NA	284364	DLASVQALLR;DLIGVQNLLK;DLSSVQTLLTK;DLTSWVTEMK;MNEVISLWK;VLETAEDIQER	1;1;1;1;1;1	6	6	0.0247	9527;10312;13007;13141;10510;15361	-	Spectrin alpha chain, non-erythrocytic 1 OS=Homo sapiens OX=9606 GN=SPTAN1 PE=1 SV=3	13491.9	71.01	SPTAN1	sp|Q13813|SPTN1_HUMAN	335_1	sp|Q13813|SPTN1_HUMAN	64.2063	NA	284364	AALLELWELR;ADVVESWIGEK;ALINADELASDVAGAEALLDR;DLTNVQNLQK;DLTSWVTEMK;DQLLAAK;DVEDEETWIR;EAALTSEEVGADLEQVEVLQK;EELITNWEQIR;EELYQNLTR;ELPTAFDYVEFTR;ENLLEEQGSIALR;EQLMASDDFGR;LIQEQHPEEELIK;LLEATELK;MNEVISLWK;QFQDAGHFDAENIK;VEDLFLTFAK;VLETAEDIQER	1;1;1;1;1;1;1;1;1;1;1;1;1;1;1;1;1;1;1	19	19	0.0898	13544;14112;26682;12220;13390;977;15979;27210;19407;12008;22268;20224;15318;22550;4595;10588;22493;12550;16328	-	Spectrin alpha chain, non-erythrocytic 1 OS=Homo sapiens OX=9606 GN=SPTAN1 PE=1 SV=3	5146.14	27.0849
sp|P52597|HNRPF_HUMAN	145_2	sp|P52597|HNRPF_HUMAN	4.07786	NA	45642.9	HSGPNSADSANDGFVR;VHIEIGPDGR	1;0	1	1	0.0627	19320;9749	-	Heterogeneous nuclear ribonucleoprotein F OS=Homo sapiens OX=9606 GN=HNRNPF PE=1 SV=3	116.222	5.5344	HNRNPF	sp|P52597|HNRPF_HUMAN	267_2	sp|P52597|HNRPF_HUMAN	6.64687	NA	45642.9	QSGEAFVELGSEDDVK;TEMDWVLK;VHIEIGPDGR	1;1;0	2	3	0.0819	23786;23785;7548;9728;9729;9730	-	Heterogeneous nuclear ribonucleoprotein F OS=Homo sapiens OX=9606 GN=HNRNPF PE=1 SV=3	831.598	39.5999
sp|P18124|RL7_HUMAN	217_1	sp|P18124|RL7_HUMAN	8.86143	NA	29207.2	EANNFLWPFK;LAFVIR;SVNELIYK	1;1;1	3	3	0.0968	14574;335;6107	-	60S ribosomal protein L7 OS=Homo sapiens OX=9606 GN=RPL7 PE=1 SV=1	3739.6	233.725	RPL7	sp|P18124|RL7_HUMAN	426_1	sp|P18124|RL7_HUMAN	22.879	NA	29207.2	AGNFYVPAEPK;EANNFLWPFK;EVPAVPETLK;IALTDNALIAR;LAFVIR;SVNELIYK	1;1;1;1;1;1	6	7	0.2258	12873;15236;9404;9403;12156;338;5948	-	60S ribosomal protein L7 OS=Homo sapiens OX=9606 GN=RPL7 PE=1 SV=1	2493.92	155.87
sp|P35579|MYH9_HUMAN	38_1	sp|P35579|MYH9_HUMAN	46.802	NA	226392	DLEGLSQR;DLGEELEALK;EDQSILCTGESGAGK;EMEAELEDER;FDQLLAEEK;FLSNGHVTIPGQQDK;GDLPFVVPR;HSQAVEELAEQLEQTK;IAEFTTNLTEEEEK;IAQLEEQLDNETK;LDPHLVLDQLR;LVWVPSDK;VEAQLQELQVK;YLYVDK	1;1;1;1;1;1;1;1;1;1;1;1;1;1	14	14	0.0791	4783;10425;18766;14163;9739;19393;7047;20175;19464;18586;15680;5443;15006;1781	-	Myosin-9 OS=Homo sapiens OX=9606 GN=MYH9 PE=1 SV=4	29325.7	230.911	MYH9	sp|P35579|MYH9_HUMAN	69_1	sp|P35579|MYH9_HUMAN	189.132	NA	226392	ADFCIIHYAGK;AGVLAHLEEER;ALELDSNLYR;ANLQIDQINTDLNLER;ASITALEAK;DELADEIANSSGK;DFSALESQLQDTQELLQEENR;DLEGLSQR;DLGEELEALK;DLGEELEALKTELEDTLDSTAAQQELR;DMFQETMEAMR;DVLLQVDDER;EDQSILCTGESGAGK;EEVGEEAIVELVENGK;EQADFAIEALAK;FDQLLAEEK;FLSNGHVTIPGQQDK;FVSELWK;GDLPFVVPR;HSQAVEELAEQLEQTK;IAEFTTNLTEEEEK;IAQLEEELEEEQGNTELINDR;IAQLEEQLDNETK;KEEELQAALAR;KLEEEQIILEDQNCK;KLEGDSTDLSDQIAELQAQIAELK;KQELEEICHDLEAR;LDPH…	1;1;1;1;1;1;1;1;1;1;1;1;1;1;1;1;1;1;1;1;1;1;1;1;1;1;1;1;1;1;1;1;1;1;1;1;1;1;1;1;1;1;1;1;1;1;1	47	67	0.302	16086;13868;12915;12916;25183;25199;25196;4258;4257;17569;27727;4611;10469;10470;28276;18484;13130;13129;13128;21691;21690;24106;24120;16437;9722;23024;4388;6918;6916;6917;24957;23168;23169;27689;21318;21319;14957;2655;25327;27921;24354;16786;24273;25740;25715;24190;5311;23655;27405;27404;23962;26676;26677;23014;23015;23956;23791;26321;13286;13285;25546;25816;15805;22027;4824;4825;1779	-	Myosin-9 OS=Homo sapiens OX=9606 GN=MYH9 PE=1 SV=4	12441.1	97.9617
sp|P50395|GDIB_HUMAN	89_2	sp|P50395|GDIB_HUMAN	13.2287	NA	50630.9	DLGTESQIFISR;FVSISDLLVPK;LYSESLAR;MLLYTEVTR;MTGSEFDFEEMK;VTEGSFVYK	1;1;0;0;1;1	4	5	0.1371	16569;16570;13397;5330;10697;17779;7881	-	Rab GDP dissociation inhibitor beta OS=Homo sapiens OX=9606 GN=GDI2 PE=1 SV=2	4708.78	162.372	GDI2	sp|P50395|GDIB_HUMAN	165_2	sp|P50395|GDIB_HUMAN	20.7099	NA	50630.9	DLGTESQIFISR;DWNVDLIPK;EIRPALELLEPIEQK;FVSISDLLVPK;GRDWNVDLIPK;LYSESLAR;MLLYTEVTR;MTGSEFDFEEMK;TDDYLDQPCYETINR	1;0;1;1;0;0;0;1;1	5	5	0.209	17985;9940;24429;13696;16607;5193;10781;10782;19814;25423	-	Rab GDP dissociation inhibitor beta OS=Homo sapiens OX=9606 GN=GDI2 PE=1 SV=2	1035.69	35.7134
sp|Q9UKA2|FBXL4_HUMAN	210_1	sp|Q9UKA2|FBXL4_HUMAN	2.03652	NA	70051.1	GFISVAGFSR	1	1	1	0.0161	8228	-	F-box/LRR-repeat protein 4 OS=Homo sapiens OX=9606 GN=FBXL4 PE=1 SV=2	310.456	10.0147	FBXL4
sp|Q96KW2|P12L2_HUMAN	219_1	sp|Q96KW2|P12L2_HUMAN	2.43749	NA	109844	HPRPIWSPVTIR	1	1	1	0.0116	17861	-	POM121-like protein 2 OS=Homo sapiens OX=9606 GN=POM121L2 PE=3 SV=2	787.004	23.1472	POM121L2
sp|Q12904|AIMP1_HUMAN	120_1	sp|Q12904|AIMP1_HUMAN	2.3325	NA	34331.1	ITFDAFPGEPDK	1	1	1	0.0385	16024	-	Aminoacyl tRNA synthase complex-interacting multifunctional protein 1 OS=Homo sapiens OX=9606 GN=AIMP1 PE=1 SV=2	337.72	18.7622	AIMP1
sp|P05091|ALDH2_HUMAN	13_1	sp|P05091|ALDH2_HUMAN	4.59047	NA	56345.6	TEQGPQVDETQFK;VTLELGGK	1;1	2	2	0.0406	18368;2161	-	Aldehyde dehydrogenase, mitochondrial OS=Homo sapiens OX=9606 GN=ALDH2 PE=1 SV=2	2252.09	93.8372	ALDH2	sp|P05091|ALDH2_HUMAN	169_1	sp|P05091|ALDH2_HUMAN	2.02446	NA	56345.6	VAFTGSTEIGR	1	1	1	0.0213	11156	-	Aldehyde dehydrogenase, mitochondrial OS=Homo sapiens OX=9606 GN=ALDH2 PE=1 SV=2	338.357	14.0982
sp|P00367|DHE3_HUMAN	17_1	sp|P00367|DHE3_HUMAN	4.32186	NA	61359.2	DIVHSGLAYTMER;TAAYVNAIEK	1;1	2	2	0.0412	18234;9353	-	Glutamate dehydrogenase 1, mitochondrial OS=Homo sapiens OX=9606 GN=GLUD1 PE=1 SV=2	1167.85	33.3671	GLUD1	sp|P00367|DHE3_HUMAN	30_1	sp|P00367|DHE3_HUMAN	20.2169	NA	61359.2	DDGSWEVIEGYR;EDDPNFFK;FTMELAK;MVEGFFDR;YNLGLDLR;YSTDVSVDEVK	1;1;1;1;1;1	6	7	0.0968	19284;7238;2663;6925;5889;14404;14398	sp|P49448|DHE4_HUMAN	Glutamate dehydrogenase 1, mitochondrial OS=Homo sapiens OX=9606 GN=GLUD1 PE=1 SV=2	2149.8	61.4228
sp|P62269|RS18_HUMAN	224_1	sp|P62269|RS18_HUMAN	5.65745	NA	17707.9	IPDWFLNR;VLNTNIDGR	1;1	2	2	0.1118	8816;7098	-	40S ribosomal protein S18 OS=Homo sapiens OX=9606 GN=RPS18 PE=1 SV=3	924.342	77.0285	RPS18	sp|P62269|RS18_HUMAN	440_1	sp|P62269|RS18_HUMAN	7.1053	NA	17707.9	IPDWFLNR;YSQVLANGLDNK	1;1	2	2	0.1316	8736;16854	-	40S ribosomal protein S18 OS=Homo sapiens OX=9606 GN=RPS18 PE=1 SV=3	395.618	32.9682
sp|O43175|SERA_HUMAN	165_1	sp|O43175|SERA_HUMAN	6.41036	NA	56614.4	GGIVDEGALLR;VTADVINAAEK	1;1	2	2	0.0413	9937;10840	-	D-3-phosphoglycerate dehydrogenase OS=Homo sapiens OX=9606 GN=PHGDH PE=1 SV=4	2068.67	86.1945	PHGDH	sp|O43175|SERA_HUMAN	315_1	sp|O43175|SERA_HUMAN	24.1429	NA	56614.4	AGTGVDNVDLEAATR;DLPLLLFR;GGIVDEGALLR;ILQDGGLQVVEK;QADVNLVNAK;QHVTEAFQFHF;VTADVINAAEK	1;1;1;1;1;1;1	7	8	0.1463	20550;20551;6550;9956;16223;9043;4886;10931	-	D-3-phosphoglycerate dehydrogenase OS=Homo sapiens OX=9606 GN=PHGDH PE=1 SV=4	1782.94	74.2891
sp|P68431|H31_HUMAN	77_1	sp|P68431|H31_HUMAN	2.62098	NA	15394.5	EIAQDFK	1	1	1	0.0515	3019	sp|Q16695|H31T_HUMAN;sp|Q71DI3|H32_HUMAN;sp|P84243|H33_HUMAN	Histone H3.1 OS=Homo sapiens OX=9606 GN=H3C1 PE=1 SV=2	2497.06	416.177	H3C1	sp|P68431|H31_HUMAN	146_1	sp|P68431|H31_HUMAN	3.12037	NA	15394.5	EIAQDFK	1	1	1	0.0515	2941	sp|Q16695|H31T_HUMAN;sp|Q71DI3|H32_HUMAN;sp|P84243|H33_HUMAN	Histone H3.1 OS=Homo sapiens OX=9606 GN=H3C1 PE=1 SV=2	127.569	21.2615
sp|Q14651|PLSI_HUMAN	96_1	sp|Q14651|PLSI_HUMAN	3.03647	NA	70209.3	LSPEELLLR	1	1	1	0.0143	9059	sp|P13796|PLSL_HUMAN;sp|P13797|PLST_HUMAN	Plastin-1 OS=Homo sapiens OX=9606 GN=PLS1 PE=1 SV=2	723.228	21.916	PLS1
sp|Q15517|CDSN_HUMAN	273_1	sp|Q15517|CDSN_HUMAN	4.07786	NA	51490.2	GSPGVPSFAAGPPISEGK	1	1	1	0.034	19476	-	Corneodesmosin OS=Homo sapiens OX=9606 GN=CDSN PE=1 SV=3	654.533	59.503	CDSN
sp|P59190|RAB15_HUMAN	255_1	sp|P59190|RAB15_HUMAN	4.07786	NA	24375.2	IQIWDTAGQER	1	1	1	0.0519	15630	-	Ras-related protein Rab-15 OS=Homo sapiens OX=9606 GN=RAB15 PE=1 SV=1	1434.03	84.3546	RAB15	sp|P59190|RAB15_HUMAN	508_1	sp|P59190|RAB15_HUMAN	4.42758	NA	24375.2	IQIWDTAGQER	1	1	2	0.0519	16722;16721	-	Ras-related protein Rab-15 OS=Homo sapiens OX=9606 GN=RAB15 PE=1 SV=1	334.223	19.6602
sp|P06396|GELS_HUMAN	198_1	sp|P06396|GELS_HUMAN	4.07786	NA	85644.2	TGAQELLR	1	1	1	0.0102	3981	-	Gelsolin OS=Homo sapiens OX=9606 GN=GSN PE=1 SV=1	1146.89	31.8582	GSN	sp|P06396|GELS_HUMAN	392_1	sp|P06396|GELS_HUMAN	15.3072	NA	85644.2	EPGLQIWR;QTQVSVLPEGGETPLFK;SEDCFILDHGK;TGAQELLR	1;1;1;1	4	5	0.0563	6886;24865;16822;3860;3861	-	Gelsolin OS=Homo sapiens OX=9606 GN=GSN PE=1 SV=1	791.335	21.9815
sp|Q96TA1|NIBA2_HUMAN	79_1	sp|Q96TA1|NIBA2_HUMAN	2.43749	NA	84084.7	VEGPAFTDAIR	1	1	1	0.0147	12129	-	Protein Niban 2 OS=Homo sapiens OX=9606 GN=NIBAN2 PE=1 SV=3	1275.63	30.3721	NIBAN2	sp|Q96TA1|NIBA2_HUMAN	150_1	sp|Q96TA1|NIBA2_HUMAN	20.5003	NA	84084.7	EQMDNAVYTFETLLHQELGK;FEEVLSK;FQELIFEDFAR;LGEYMEK;TDMDQIITSK;VEGPAFTDAIR	1;1;1;1;1;1	6	6	0.0885	27481;2983;19032;3401;11575;12329	-	Protein Niban 2 OS=Homo sapiens OX=9606 GN=NIBAN2 PE=1 SV=3	1558.11	37.0979
sp|P04075|ALDOA_HUMAN	264_1	sp|P04075|ALDOA_HUMAN	10.5932	NA	39395.3	GILAADESTGSIAK;LQSIGTENTEENR;QLLLTADDR	1;1;1	3	4	0.0989	15955;18225;18224;7827	-	Fructose-bisphosphate aldolase A OS=Homo sapiens OX=9606 GN=ALDOA PE=1 SV=2	4451.43	193.54	ALDOA	sp|P04075|ALDOA_HUMAN	523_1	sp|P04075|ALDOA_HUMAN	31.2575	NA	39395.3	ELSDIAHR;FSHEEIAMATVTALR;GILAADESTGSIAK;GVVPLAGTNGETTTQGLDGLSER;IGEHTPSALAIMENANVLAR;LQSIGTENTEENR;PYQYPALTPEQK;QLLLTADDR	1;1;1;1;1;1;1;1	8	12	0.3132	5241;23421;17170;17169;27251;26585;20585;19479;19476;19477;19480;8248	-	Fructose-bisphosphate aldolase A OS=Homo sapiens OX=9606 GN=ALDOA PE=1 SV=2	6518.19	283.4
sp|P00338|LDHA_HUMAN	45_1	sp|P00338|LDHA_HUMAN	13.9344	NA	36665.4	FIIPNVVK;LNLVQR;QVVESAYEVIK;SADTLWGIQK;VTLTSEEEAR	1;1;1;1;1	5	8	0.1355	5104;708;14565;10484;10485;10942;10940;10941	-	L-lactate dehydrogenase A chain OS=Homo sapiens OX=9606 GN=LDHA PE=1 SV=2	10962.6	456.777	LDHA	sp|P00338|LDHA_HUMAN	78_1	sp|P00338|LDHA_HUMAN	27.1642	NA	36665.4	DLADELALVDVIEDK;DQLIYNLLKEEQTPQNK;FIIPNVVK;GEMMDLQHGSLFLR;LVIITAGAR;QVVESAYEVIK;SADTLWGIQK;YLMGER	1;1;1;1;1;1;1;1	8	10	0.2711	23227;26427;4983;22912;4511;15200;14636;10546;10545;1142	-	L-lactate dehydrogenase A chain OS=Homo sapiens OX=9606 GN=LDHA PE=1 SV=2	5134.48	213.937
sp|P00505|AATM_HUMAN	32_1	sp|P00505|AATM_HUMAN	8.15573	NA	47487.3	FVTVQTISGTGALR;IAAAILNTPDLR	1;1	2	2	0.0605	17778;14642	-	Aspartate aminotransferase, mitochondrial OS=Homo sapiens OX=9606 GN=GOT2 PE=1 SV=3	1509.45	52.0498	GOT2	sp|P00505|AATM_HUMAN	56_1	sp|P00505|AATM_HUMAN	4.42758	NA	47487.3	IAAAILNTPDLR	1	1	1	0.0279	15311	-	Aspartate aminotransferase, mitochondrial OS=Homo sapiens OX=9606 GN=GOT2 PE=1 SV=3	259.032	8.93214
sp|P62995|TRA2B_HUMAN	71_1	sp|P62995|TRA2B_HUMAN	3.03647	NA	33645.6	VDFSITK	1	1	1	0.0243	1986	-	Transformer-2 protein homolog beta OS=Homo sapiens OX=9606 GN=TRA2B PE=1 SV=1	1616.38	146.943	TRA2B
sp|Q01105|SET_HUMAN	11_1	sp|Q01105|SET_HUMAN	6.11439	NA	33468.7	LNEQASEEILK;VEVTEFEDIK	1;1	2	2	0.0724	14762;13110	-	Protein SET OS=Homo sapiens OX=9606 GN=SET PE=1 SV=3	4401.28	400.116	SET	sp|Q01105|SET_HUMAN	23_1	sp|Q01105|SET_HUMAN	13.2827	NA	33468.7	EQQEAIEHIDEVQNEIDR;LNEQASEEILK;VEVTEFEDIK	1;1;1	3	6	0.1345	26982;26983;15484;15483;13372;13371	-	Protein SET OS=Homo sapiens OX=9606 GN=SET PE=1 SV=3	1034.67	94.0607
sp|P68104|EF1A1_HUMAN	90_1	sp|P68104|EF1A1_HUMAN	13.0595	NA	50109.1	IGGIGTVPVGR;QLIVGVNK;QTVAVGVIK;YYVTIIDAPGHR	1;1;1;1	4	5	0.0866	7793;3104;4708;17155;17156	sp|Q5VTE0|EF1A3_HUMAN	Elongation factor 1-alpha 1 OS=Homo sapiens OX=9606 GN=EEF1A1 PE=1 SV=1	19641.6	853.982	EEF1A1	sp|P68104|EF1A1_HUMAN	168_1	sp|P68104|EF1A1_HUMAN	30.5601	NA	50109.1	DGNASGTTLLEALDCILPPTRPTDKPLR;EHALLAYTLGVK;EVSTYIK;IGGIGTVPVGR;LPLQDVYK;QTVAVGVIK;VETGVLKPGMVVTFAPVNVTTEVK;YYVTIIDAPGHR	1;1;1;1;1;1;1;1	8	16	0.2403	28277;16660;16657;2673;2672;2670;7671;7672;7670;6216;4536;4535;4537;27763;18826;18825	sp|Q5VTE0|EF1A3_HUMAN	Elongation factor 1-alpha 1 OS=Homo sapiens OX=9606 GN=EEF1A1 PE=1 SV=1	5230.03	227.393
sp|P08670|VIME_HUMAN	2_8	sp|P08670|VIME_HUMAN	67.8366	NA	53619.1	DGQVINETSQHHDDLE;DNLAEDIMR;EEAENTLQSFR;ETNLDSLPLVDTHSK;EYQDLLNVK;FADLSEAANR;KVESLQEEIAFLK;LGDLYEEEMR;LLEGEESR;LQDEIQNMK;NLQEAEEWYK;QDVDNASLAR;QQYESVAAK;QVDQLTNDK;QVQSLTCEVDALK;SLYASSPGGVYATR;SYVTTSTR;TYSLGSALRPSTSR;VELQELNDR	1;1;1;1;1;1;1;1;0;1;1;1;1;1;1;1;1;1;1	18	31	0.4421	20164;9258;9732;9257;15775;15774;19546;10573;9763;18629;18630;14270;14681;14271;5165;5163;10475;10474;15502;15501;9614;9612;9126;7725;7229;8810;18228;17524;17523;4679;18274;18276;10381	-	Vimentin OS=Homo sapiens OX=9606 GN=VIM PE=1 SV=4	53837.8	1631.45	VIM	sp|P08670|VIME_HUMAN	2_1	sp|P08670|VIME_HUMAN	98.7512	NA	53619.1	DGQVINETSQHHDDLE;DNLAEDIMR;EEAENTLQSFR;EMEENFAVEAANYQDTIGR;ETNLDSLPLVDTHSK;EYQDLLNVK;FADLSEAANR;ILLAELEQLK;ILLAELEQLKGQGK;KVESLQEEIAFLK;LGDLYEEEMR;LQDEIQNMK;LQDEIQNMKEEMAR;MALDIEIATYR;NLQEAEEWYK;QDVDNASLAR;QQYESVAAK;QVDQLTNDK;QVQSLTCEVDALK;SLYASSPGGVYATR;TNEKVELQELNDR;TYSLGSALRPSTSR;VELQELNDR;VESLQEEIAFLK	1;1;1;1;1;1;1;1;1;1;1;1;1;1;1;1;1;1;1;1;1;1;1;1	24	48	0.5215	24921;9200;9201;16896;16895;26957;23343;23344;10649;9746;9747;9745;12124;12123;21506;21400;21398;21397;21399;21396;14839;14840;10528;10529;10530;11037;24026;16125;16123;16124;16530;16549;9586;9583;9018;9019;9587;7599;8724;20595;19360;19359;19358;22272;20701;10426;10425;18863	-	Vimentin OS=Homo sapiens OX=9606 GN=VIM PE=1 SV=4	33986.7	1029.9
sp|P35908|K22E_HUMAN	2_9	sp|P35908|K22E_HUMAN	77.2639	NA	65393.2	DVDNAYMIK;DYQELMNVK;EEAEALYHSK;FLEQQNQVLQTK;GFSSGSAVVSGGSR;GGSGGGGSISGGGYGSGGGSGGR;GSSSGGGYSSGSSSYGSGGR;HGGGGGGFGGGGFGSR;IEISELNR;LALDVEIATYR;LNDLEEALQQAK;LQGEIAHVK;NLDLDSIIAEVK;NVQDAIADAEQR;QSGSRGGSGGGGSISGGGYGSGGGSGGR;SLVGLGGTK;TAAENDFVTLK;TAAENDFVTLKK;TSQNSELNNMQDLVEDYK;TSQNSELNNMQDLVEDYKK;VDLLNQEIEFLK;VDPEIQNVK;YEDEINK;YEELQVTVGR;YLDGLTAER	1;1;1;0;1;1;1;1;0;0;1;1;0;1;1;1;1;1;1;1;1;1;0;1;1	20	40	0.421	9022;9478;11519;12152;12157;12153;18065;18067;18064;18063;18066;14278;14279;14280;14277;19830;19821;15724;15725;15722;6301;14547;16660;16659;16661;6913;15901;15884;15883;15885;20852;2504;13121;13119;13120;16031;20743;20756;20757;20851;17891;17890;8263;4583;4582;12668;12667;8154;8155;8160	-	Keratin, type II cytoskeletal 2 epidermal OS=Homo sapiens OX=9606 GN=KRT2 PE=1 SV=2	65633.3	1562.7	KRT2	sp|P35908|K22E_HUMAN	8_7	sp|P35908|K22E_HUMAN	94.9374	NA	65393.2	AQYEEIAQR;DVDNAYMIK;DYQELMNVK;FLEQQNQVLQTK;GFSSGSAVVSGGSR;GGGFGGGSSFGGGSGFSGGGFGGGGFGGGR;GGSISGGGYGSGGGK;HGGGGGGFGGGGFGSR;IEISELNR;LALDVEIATYR;LNDLEEALQQAK;LQGEIAHVK;NKLNDLEEALQQAK;NLDLDSIIAEVK;NVQDAIADAEQR;SKEEAEALYHSK;SLVGLGGTK;STSSFSCLSR;TAAENDFVTLK;TAAENDFVTLKK;TSQNSELNNMQDLVEDYK;TSQNSELNNMQDLVEDYKK;VDLLNQEIEFLK;VDPEIQNVK;VLYDAEISQIHQSVTDTNVILSMDNSR;YEELQVTVGR;YLDGLTAER	0;1;1;0;1;1;1;1;0;0;1;1;1;0;1;1;1;1;1;1;1;1;1;1;1;1;1	22	52	0.4836	10171;10183;8947;8948;9443;9442;11679;11678;20330;20329;20331;20355;14852;14855;14854;14847;14857;14853;27554;13001;13002;13003;16821;16820;6146;15173;15170;15172;15169;15171;18106;18105;6805;22663;22649;17087;17086;17054;17055;17059;17056;18561;2484;2483;10939;13377;13378;13376;13393;17281;26683;26763;26762;26695;26685;27200;20016;20015;8150;8142;28303;12912;12913;12914;12908;8037	-	Keratin, type II cytoskeletal 2 epidermal OS=Homo sapiens OX=9606 GN=KRT2 PE=1 SV=2	64914.2	1545.58
sp|P07910|HNRPC_HUMAN	64_1	sp|P07910|HNRPC_HUMAN	4.07786	NA	33649.5	VFIGNLNTLVVK	1	1	1	0.0392	15643	sp|O60812|HNRC1_HUMAN;sp|B7ZW38|HNRC3_HUMAN;sp|B2RXH8|HNRC2_HUMAN	Heterogeneous nuclear ribonucleoproteins C1/C2 OS=Homo sapiens OX=9606 GN=HNRNPC PE=1 SV=4	529.643	24.0747	HNRNPC	sp|P07910|HNRPC_HUMAN	113_1	sp|P07910|HNRPC_HUMAN	11.1574	NA	33649.5	SDVEAIFSK;VFIGNLNTLVVK;VPPPPPIAR	1;1;1	3	4	0.098	6821;6820;16744;5329	-	Heterogeneous nuclear ribonucleoproteins C1/C2 OS=Homo sapiens OX=9606 GN=HNRNPC PE=1 SV=4	2192.76	99.6707
sp|Q9NTI2|AT8A2_HUMAN	53_1	sp|Q9NTI2|AT8A2_HUMAN	2.62098	NA	133513	SSVGPVR	1	1	1	0.0059	36	-	Phospholipid-transporting ATPase IB OS=Homo sapiens OX=9606 GN=ATP8A2 PE=1 SV=3	1687.07	25.9549	ATP8A2
sp|P15924|DESP_HUMAN	138_1	sp|P15924|DESP_HUMAN	5.65745	NA	331569	LGIYEAMK;VLLQEEGTR	1;1	2	2	0.0059	4962;8355	-	Desmoplakin OS=Homo sapiens OX=9606 GN=DSP PE=1 SV=3	1086.54	5.32616	DSP	sp|P15924|DESP_HUMAN	259_1	sp|P15924|DESP_HUMAN	19.7975	NA	331569	LTYEIEDEK;NTLTQTTENLR;SAIYQLEEEYENLLK;TLELQGLINDLQR;YIELLTR	1;1;1;1;1	5	5	0.0192	11198;15962;24970;21000;4367	-	Desmoplakin OS=Homo sapiens OX=9606 GN=DSP PE=1 SV=3	786.257	3.8542
sp|O75083|WDR1_HUMAN	283_1	sp|O75083|WDR1_HUMAN	9.02737	NA	66151.9	DYSGQGVVK;YAPSGFYIASGDVSGK;YEYQPFAGK	1;1;1	3	3	0.0561	5723;19243;10000	-	WD repeat-containing protein 1 OS=Homo sapiens OX=9606 GN=WDR1 PE=1 SV=4	1880.56	50.8259	WDR1	sp|O75083|WDR1_HUMAN	567_1	sp|O75083|WDR1_HUMAN	24.5741	NA	66151.9	DIAWTEDSK;GNNFLYTNGK;LYSILGTTLK;LYSILGTTLKDEGK;NIDNPALADIYTEHAHQVVVAK;SYIYSGSHDGHINYWDSETGENDSFAGK;VFASLPQVER;YEYQPFAGK	1;1;1;1;1;1;1;1	8	8	0.1683	8842;10852;10244;21479;13402;28321;11393;10015	-	WD repeat-containing protein 1 OS=Homo sapiens OX=9606 GN=WDR1 PE=1 SV=4	4689.62	126.746
sp|Q14CN4|K2C72_HUMAN	2_1	sp|Q14CN4|K2C72_HUMAN	4.07786	NA	55842.4	NMQDLVEDYK;TAAENEFVVLK	1;0	1	1	0.0411	14267;13467	-	Keratin, type II cytoskeletal 72 OS=Homo sapiens OX=9606 GN=KRT72 PE=1 SV=2	600.905	16.6918	KRT72
sp|Q7Z794|K2C1B_HUMAN	2_2	sp|Q7Z794|K2C1B_HUMAN	11.1922	NA	61863.5	EQIMVLNNK;FLEQQNQVLQTK;QVDLLSAEQMR;TGSENDFVVLK;YEDEINK	1;0;1;1;0	3	4	0.0865	9632;18065;18067;18064;18063;18066;15085;15086;13116;4583;4582	-	Keratin, type II cytoskeletal 1b OS=Homo sapiens OX=9606 GN=KRT77 PE=2 SV=3	3431.87	100.937	KRT77	sp|Q7Z794|K2C1B_HUMAN	8_1	sp|Q7Z794|K2C1B_HUMAN	2.26421	NA	61863.5	FLEQQNQVLQTK;VDTLTGEVNFLK	0;1	1	1	0.0415	20330;20329;20331;20355;17259	-	Keratin, type II cytoskeletal 1b OS=Homo sapiens OX=9606 GN=KRT77 PE=2 SV=3	90.23	2.65382
sp|P08729|K2C7_HUMAN	2_3	sp|P08729|K2C7_HUMAN	19.8041	NA	51354.3	EVTINQSLLAPLR;GQLEALQVDGGR;LALDIEIATYR;LDADPSLQR;LEAAIAEAEER;LLEGEESR;SMQDVVEDFK;TAAENEFVVLK;VDALNDEINFLR	1;1;0;1;1;0;1;0;1	6	6	0.2068	17816;13975;14850;7469;12891;5165;5163;12753;13467;17378	-	Keratin, type II cytoskeletal 7 OS=Homo sapiens OX=9606 GN=KRT7 PE=1 SV=5	10524	309.528	KRT7	sp|P08729|K2C7_HUMAN	8_2	sp|P08729|K2C7_HUMAN	16.2823	NA	51354.3	GQLEALQVDGGR;LALDIEIATYR;LQAEIDNIK;SLDLDGIIAEVK;SMQDVVEDFK	1;0;1;1;1	4	4	0.1151	14437;15611;15612;15610;15613;15608;15609;15605;15606;15603;15607;8212;15459;13005	-	Keratin, type II cytoskeletal 7 OS=Homo sapiens OX=9606 GN=KRT7 PE=1 SV=5	2831.7	83.2854
sp|P02538|K2C6A_HUMAN	2_4	sp|P02538|K2C6A_HUMAN	8.15573	NA	60008.3	ADTLTDEINFLR;GMQDLVEDFK;LALDVEIATYR;LEGLEDALQK;NLDLDSIIAEVK;QLDSIVGER;SGFSSVSVSR;TAAENEFVTLK;WTLLQEQGTK;YEDEINK	0;1;0;0;0;0;1;0;0;0	2	2	0.1809	17205;12301;14547;10384;15901;7546;7403;13517;13516;12972;4583;4582	-	Keratin, type II cytoskeletal 6A OS=Homo sapiens OX=9606 GN=KRT6A PE=1 SV=3	1307.29	36.3136	KRT6A	sp|P02538|K2C6A_HUMAN	8_6	sp|P02538|K2C6A_HUMAN	4.97994	NA	60008.3	ADTLTDEINFLR;AEAESWYQTK;AIGGGLSSVGGGSSTIK;AQYEEIAQR;GMQDLVEDFK;ISIGGGSCAISGGYGSR;LALDVEIATYR;LEGLEDALQK;NKYEDEINK;NLDLDSIIAEVK;QLDSIVGER;QNLEPLFEQYINNLR;SGFSSVSVSR;SLYGLGGSK;TAAENEFVTLK;WTLLQEQGTK;YEELQVTAGR	0;0;0;0;1;0;0;0;0;0;0;0;1;0;0;0;0	2	2	0.3387	18903;13477;19774;19775;10171;10183;12498;22437;15173;15170;15172;15169;15171;10435;11594;17087;17086;7404;25222;25345;25346;7277;3726;13845;13222;13221;12006;12010;12011	-	Keratin, type II cytoskeletal 6A OS=Homo sapiens OX=9606 GN=KRT6A PE=1 SV=3	1423.76	39.5488
sp|P04259|K2C6B_HUMAN	2_5	sp|P04259|K2C6B_HUMAN	10.7767	NA	60030.3	ADTLTDEINFLR;ATGGGLSSVGGGSSTIK;LALDVEIATYR;LEGLEDALQK;NLDLDSIIAEVK;NMQDLVEDLK;SGFSSISVSR;TAAENEFVTLK;WTLLQEQGTK;YEDEINK	0;1;0;0;0;1;1;0;0;0	3	3	0.195	17205;17620;14547;10384;15901;12994;7804;13517;13516;12972;4583;4582	-	Keratin, type II cytoskeletal 6B OS=Homo sapiens OX=9606 GN=KRT6B PE=1 SV=5	3246.41	90.178	KRT6B
sp|P05787|K2C8_HUMAN	2_6	sp|P05787|K2C8_HUMAN	34.2137	NA	53671.1	AEAESMYQIK;AQYEDIANR;ASLEAAIADAEQR;ISSSSFSR;LALDIEIATYR;LEGLTDEINFLR;LLEGEESR;LSELEAALQR;LVSESSDVLPK;QLYEEEIR;SLDMDSIIAEVK;TEMENEFVLIK;YEDEINK	1;1;1;1;0;1;0;1;1;1;1;1;0	10	11	0.2692	11933;9339;16183;3538;14850;17399;5165;5163;10807;10806;12072;9351;15736;16329;4583;4582	-	Keratin, type II cytoskeletal 8 OS=Homo sapiens OX=9606 GN=KRT8 PE=1 SV=7	14173.2	442.913	KRT8	sp|P05787|K2C8_HUMAN	8_3	sp|P05787|K2C8_HUMAN	40.2138	NA	53671.1	AEAESMYQIK;LALDIEIATYR;LEAELGNMQGLVEDFK;LEGLTDEINFLR;LQAEIEGLK;LSELEAALQR;LVSESSDVLPK;NKYEDEINK;QLYEEEIR;SNMDNMFESYINNLR;TEMENEFVLIK;WSLLQQQK	1;0;1;1;1;1;1;0;1;1;1;1	10	15	0.2692	12093;15611;15612;15610;15613;15608;15609;15605;15606;15603;15607;24587;12974;19167;6941;6942;10896;12254;12253;11594;9305;9303;25018;17671;17672;7845	-	Keratin, type II cytoskeletal 8 OS=Homo sapiens OX=9606 GN=KRT8 PE=1 SV=7	5931.84	185.37
sp|P13647|K2C5_HUMAN	2_7	sp|P13647|K2C5_HUMAN	35.6594	NA	62340	AQYEEIANR;ISISTSGGSFR;LALDVEIATYR;NLDLDSIIAEVK;NMQDLVEDFK;QLDSIVGER;SLYNLGGSK;TEAESWYQTK;TSFTSVSR;TTAENEFVMLK;VDALMDEINFMK;WTLLQEQGTK;YEDEINK;YEELQQTAGR	1;1;0;0;1;0;1;1;1;1;1;0;0;1	9	16	0.2356	9760;10277;14547;15901;13876;13877;7546;5334;5333;13964;3893;15271;15272;14935;17678;17679;17470;17676;12972;4583;4582;12680	-	Keratin, type II cytoskeletal 5 OS=Homo sapiens OX=9606 GN=KRT5 PE=1 SV=3	10788.5	308.243	KRT5	sp|P13647|K2C5_HUMAN	8_5	sp|P13647|K2C5_HUMAN	46.7668	NA	62340	AQYEEIANR;ISISTSGGSFR;LAELEEALQK;LALDVEIATYR;NKYEDEINK;NLDLDSIIAEVK;NMQDLVEDFK;QLDSIVGER;QNLEPLFEQYINNLR;SFSTASAITPSVSR;SLYNLGGSK;TEAESWYQTK;TTAENEFVMLK;VDALMDEINFMK;VSLAGACGVGGYGSR;WTLLQEQGTK;YEELQQTAGR	1;1;1;0;0;0;1;0;0;1;1;1;1;1;1;0;1	11	23	0.3169	9744;10324;10323;11319;15173;15170;15172;15169;15171;11594;17087;17086;14311;14310;14844;7404;25222;25345;25346;18964;5200;5199;14426;14425;16202;16201;15742;15743;19287;19602;19603;19927;19605;18957;13222;13221;12932	-	Keratin, type II cytoskeletal 5 OS=Homo sapiens OX=9606 GN=KRT5 PE=1 SV=3	10759.1	307.401
sp|Q02413|DSG1_HUMAN	100_1	sp|Q02413|DSG1_HUMAN	6.46965	NA	113676	EQYGQYALAVR;YVMGNNPADLLAVDSR	1;1	2	2	0.0257	15255;19806	-	Desmoglein-1 OS=Homo sapiens OX=9606 GN=DSG1 PE=1 SV=2	1113.54	28.5524	DSG1	sp|Q02413|DSG1_HUMAN	191_1	sp|Q02413|DSG1_HUMAN	5.03988	NA	113676	EQYGQYALAVR;QEPSDSPMFIINR	1;1	2	2	0.0229	16175;21654	-	Desmoglein-1 OS=Homo sapiens OX=9606 GN=DSG1 PE=1 SV=2	621.797	15.9435
sp|A0A0A0MRZ7|KVD26_HUMAN	15_1	sp|A0A0A0MRZ7|KVD26_HUMAN	6.51535	NA	13288.5	FSGSGSGTDFTLK;FSGVPDR	1;1	2	4	0.1667	15384;15386;15385;1333	sp|A2NJV5|KV229_HUMAN;sp|A0A075B6S2|KVD29_HUMAN	Immunoglobulin kappa variable 2D-26 OS=Homo sapiens OX=9606 GN=IGKV2D-26 PE=3 SV=1	22838.8	4567.76	IGKV2D-26	sp|A0A0A0MRZ7|KVD26_HUMAN	28_1	sp|A0A0A0MRZ7|KVD26_HUMAN	6.58781	NA	13288.5	FSGSGSGTDFTLK;FSGVPDR	1;1	2	5	0.1667	16363;16364;16362;16358;1309	sp|A2NJV5|KV229_HUMAN;sp|A0A075B6S2|KVD29_HUMAN	Immunoglobulin kappa variable 2D-26 OS=Homo sapiens OX=9606 GN=IGKV2D-26 PE=3 SV=1	22054.1	4410.82
sp|Q53H82|LACB2_HUMAN	94_1	sp|Q53H82|LACB2_HUMAN	2.3325	NA	32784.9	EQQILTLFR	1	1	1	0.0312	11325	-	Endoribonuclease LACTB2 OS=Homo sapiens OX=9606 GN=LACTB2 PE=1 SV=2	445.593	27.8495	LACTB2	sp|Q53H82|LACB2_HUMAN	184_1	sp|Q53H82|LACB2_HUMAN	2.21929	NA	32784.9	SFTVMELVK	1	1	1	0.0312	8531	-	Endoribonuclease LACTB2 OS=Homo sapiens OX=9606 GN=LACTB2 PE=1 SV=2	112.271	7.01696
sp|P05198|IF2A_HUMAN	278_1	sp|P05198|IF2A_HUMAN	4.07786	NA	36089.4	VVTDTDETELAR	1	1	1	0.0381	16255	-	Eukaryotic translation initiation factor 2 subunit 1 OS=Homo sapiens OX=9606 GN=EIF2S1 PE=1 SV=3	360.944	16.4065	EIF2S1
sp|P22626|ROA2_HUMAN	194_1	sp|P22626|ROA2_HUMAN	9.62635	NA	37406.7	GFGFVTFDDHDPVDK;GGGGNFGPGPGSNFR;GGNFGFGDSR	1;1;1	3	3	0.1133	19666;16756;7421	-	Heterogeneous nuclear ribonucleoproteins A2/B1 OS=Homo sapiens OX=9606 GN=HNRNPA2B1 PE=1 SV=2	3332.22	175.38	HNRNPA2B1	sp|P22626|ROA2_HUMAN	385_1	sp|P22626|ROA2_HUMAN	14.0238	NA	37406.7	GFGFVTFDDHDPVDK;GGGGNFGPGPGSNFR;GGNFGFGDSR;IDTIEIITDR	1;1;1;1	4	4	0.1416	23644;18227;7294;12746	-	Heterogeneous nuclear ribonucleoproteins A2/B1 OS=Homo sapiens OX=9606 GN=HNRNPA2B1 PE=1 SV=2	3520.19	185.273
sp|Q14697|GANAB_HUMAN	130_1	sp|Q14697|GANAB_HUMAN	7.11433	NA	106807	GLLEFEHQR;LSFQHDPETSVLVLR	1;1	2	2	0.0254	10776;19827	-	Neutral alpha-glucosidase AB OS=Homo sapiens OX=9606 GN=GANAB PE=1 SV=3	1587.96	31.7592	GANAB	sp|Q14697|GANAB_HUMAN	249_1	sp|Q14697|GANAB_HUMAN	27.936	NA	106807	DENSVELTMAEGPYK;DEPGAWEETFK;FGAVWTGDNTAEWDHLK;GLLEFEHQR;LSFQHDPETSVLVLR;MMDYLQGSGETPQTDVR;NLGLYVK	1;1;1;1;1;1;1	7	9	0.0964	23492;16504;16503;25718;10863;10865;24078;25589;1926	-	Neutral alpha-glucosidase AB OS=Homo sapiens OX=9606 GN=GANAB PE=1 SV=3	1172.27	23.4455
sp|Q92945|FUBP2_HUMAN	238_1	sp|Q92945|FUBP2_HUMAN	8.15573	NA	73070	IGGGIDVPVPR;SVSLTGAPESVQK	1;1	2	2	0.0338	9369;15364	-	Far upstream element-binding protein 2 OS=Homo sapiens OX=9606 GN=KHSRP PE=1 SV=4	1592.5	38.8416	KHSRP	sp|Q92945|FUBP2_HUMAN	469_1	sp|Q92945|FUBP2_HUMAN	25.5241	NA	73070	AINQQTGAFVEISR;IGGGIDVPVPR;MILIQDGSQNTNVDKPLR;MMLDDIVSR;VPDGMVGLIIGR;VQISPDSGGLPER	1;1;1;1;1;1	6	6	0.1083	21388;9331;26291;9307;13944;17736	-	Far upstream element-binding protein 2 OS=Homo sapiens OX=9606 GN=KHSRP PE=1 SV=4	2103.89	51.3145
sp|P62491|RB11A_HUMAN	34_1	sp|P62491|RB11A_HUMAN	3.03647	NA	24378.4	GAVGALLVYDIAK	1	1	1	0.0602	15096	sp|Q15907|RB11B_HUMAN	Ras-related protein Rab-11A OS=Homo sapiens OX=9606 GN=RAB11A PE=1 SV=3	683.052	45.5368	RAB11A	sp|P62491|RB11A_HUMAN	59_1	sp|P62491|RB11A_HUMAN	2.55024	NA	24378.4	DDEYDYLFK	1	1	1	0.0417	13327	sp|Q15907|RB11B_HUMAN	Ras-related protein Rab-11A OS=Homo sapiens OX=9606 GN=RAB11A PE=1 SV=3	94.5877	6.30585
sp|Q16563|SYPL1_HUMAN	281_1	sp|Q16563|SYPL1_HUMAN	3.03647	NA	28546.7	TVTATFGYPFR	1	1	1	0.0425	14424	-	Synaptophysin-like protein 1 OS=Homo sapiens OX=9606 GN=SYPL1 PE=1 SV=1	571.109	51.919	SYPL1
sp|Q5D862|FILA2_HUMAN	147_1	sp|Q5D862|FILA2_HUMAN	2.03652	NA	247928	FSNSSSSNEFSK	1	1	1	0.005	15719	-	Filaggrin-2 OS=Homo sapiens OX=9606 GN=FLG2 PE=1 SV=1	71.075	0.987153	FLG2
sp|P34896|GLYC_HUMAN	149_1	sp|P34896|GLYC_HUMAN	2.01138	NA	53049	LGTPALTSR	1	1	1	0.0186	4727	-	Serine hydroxymethyltransferase, cytosolic OS=Homo sapiens OX=9606 GN=SHMT1 PE=1 SV=1	513.07	18.3239	SHMT1
sp|P18206|VINC_HUMAN	133_1	sp|P18206|VINC_HUMAN	53.8594	NA	123722	ALASQLQDSLK;AQQVSQGLDVLTAK;AVAGNISDPGLQK;DPSASPGDAGEQAIR;DYLIDGSR;EEVFDER;ELTPQVVSAAR;IFVTTK;LANVMMGPYR;LLAVAATAPPDAPNR;MALLMAEMSR;MTGLVDEAIDTK;QVATALQNLQTK;TDAGFTLR;VDQLTAQLADLAAR	1;1;1;1;1;1;1;1;1;1;1;1;1;1;1	15	16	0.1464	12076;17848;14671;17988;17989;5325;4933;11982;181;11429;18083;11453;15150;15574;3802;18170	-	Vinculin OS=Homo sapiens OX=9606 GN=VCL PE=1 SV=4	16194	192.786	VCL	sp|P18206|VINC_HUMAN	254_1	sp|P18206|VINC_HUMAN	111.891	NA	123722	AQQVSQGLDVLTAK;AVAGNISDPGLQK;DYLIDGSR;EAFQPQEPDFPPPPPDLEQLR;ELLPVLISAMK;ELTPQVVSAAR;ETVQTTEDQILK;GILSGTSDLLLTFDEAEVR;GNDIIAAAK;IDAAQNWLADPNGGPEGEEQIR;KIDAAQNWLADPNGGPEGEEQIR;LLAVAATAPPDAPNR;LLAVAATAPPDAPNREEVFDER;LTDELAPPKPPLPEGEVPPPRPPPPEEK;MSAEINEIIR;MTGLVDEAIDTK;NQGIEEALK;NQWIDNVEK;QVATALQNLQTK;SFLDSGYR;SLGEISALTSK;SLLDASEEAIK;STVEGIQASVK;TDAGFTLR;TNISDEESEQATEMLVHNAQNLMQSVK;VDQLTAQLADLAAR;VLQ…	1;1;1;1;1;1;1;1;1;1;1;1;1;1;1;1;1;1;1;1;1;1;1;1;1;1;1;1	28	40	0.3166	19963;19943;15362;15360;15361;15363;5187;27639;27636;27642;13545;12150;18820;18819;26253;3481;27515;27747;20358;27520;28281;12323;16029;16030;16028;6968;6967;11374;16659;5333;10135;12330;10553;3697;3696;28293;20485;24156;14217;14247	-	Vinculin OS=Homo sapiens OX=9606 GN=VCL PE=1 SV=4	12071.8	143.712
sp|P29401|TKT_HUMAN	235_1	sp|P29401|TKT_HUMAN	26.9047	NA	67834.7	AYGQALAK;HQPTAIIAK;ILATPPQEDAPSVDIANIR;ISSDLDGHPVPK;NSTFSEIFK;TSRPENAIIYNNNEDFQVGQAK;VLDPFTIKPLDR	1;1;1;1;1;1;1	7	8	0.1461	2256;6475;20601;14562;2839;9129;20957;17309	-	Transketolase OS=Homo sapiens OX=9606 GN=TKT PE=1 SV=3	11698.8	354.51	TKT	sp|P29401|TKT_HUMAN	466_1	sp|P29401|TKT_HUMAN	45.5969	NA	67834.7	AVELAANTK;IIALDGDTK;ILATPPQEDAPSVDIANIR;ISSDLDGHPVPK;LDNLVAILDINR;LGQSDPAPLQHQMDIYQK;LILDSAR;MPSLPSYK;NSTFSEIFK;SVPTSTVFYPSDGVATEK;TSRPENAIIYNNNEDFQVGQAK;VLDPFTIKPLDR	1;1;1;1;1;1;1;1;1;1;1;1	12	17	0.2488	4589;5387;26180;26181;15193;18059;26409;26410;1535;4761;4762;9059;9058;25296;27748;19019;19020	-	Transketolase OS=Homo sapiens OX=9606 GN=TKT PE=1 SV=3	13875.6	420.472
sp|Q99873|ANM1_HUMAN	139_1	sp|Q99873|ANM1_HUMAN	7.11433	NA	42433.9	VEEVELPVEK;WLAPDGLIFPDR	1;1	2	2	0.0593	11976;17079	-	Protein arginine N-methyltransferase 1 OS=Homo sapiens OX=9606 GN=PRMT1 PE=1 SV=3	2197.36	109.868	PRMT1	sp|Q99873|ANM1_HUMAN	260_1	sp|Q99873|ANM1_HUMAN	8.85516	NA	42433.9	ATLYVTAIEDR;WLAPDGLIFPDR	1;1	2	2	0.062	14765;18706	-	Protein arginine N-methyltransferase 1 OS=Homo sapiens OX=9606 GN=PRMT1 PE=1 SV=3	630.074	31.5037
sp|P63162|RSMN_HUMAN	37_1	sp|P63162|RSMN_HUMAN	4.07786	NA	24598	VLGLVLLR	1	1	1	0.0333	3861	sp|P14678|RSMB_HUMAN	Small nuclear ribonucleoprotein-associated protein N OS=Homo sapiens OX=9606 GN=SNRPN PE=1 SV=1	111.604	7.44025	SNRPN
sp|P60842|IF4A1_HUMAN	14_1	sp|P60842|IF4A1_HUMAN	14.6971	NA	46124.6	DQIYDIFQK;EELTLEGIR;ELAQQIQK;GIYAYGFEKPSAIQQR;GYDVIAQAQSGTGK;LQMEAPHIIVGTPGR	1;1;1;1;1;1	6	6	0.1749	11940;8785;5864;20145;17042;19244	-	Eukaryotic initiation factor 4A-I OS=Homo sapiens OX=9606 GN=EIF4A1 PE=1 SV=1	4310.29	187.404	EIF4A1	sp|P60842|IF4A1_HUMAN	27_1	sp|P60842|IF4A1_HUMAN	33.2354	NA	46124.6	ATQALVLAPTR;EELTLEGIR;ELAQQIQK;GIYAYGFEKPSAIQQR;GVAINMVTEEDK;LQMEAPHIIVGTPGR;MFVLDEADEMLSR;VDWLTEK;VLITTDLLAR	1;1;1;1;1;1;1;1;1	9	10	0.2488	11242;8702;5709;24843;16428;22720;21769;3934;10410;10409	-	Eukaryotic initiation factor 4A-I OS=Homo sapiens OX=9606 GN=EIF4A1 PE=1 SV=1	3305.3	143.709
sp|Q9BVC6|TM109_HUMAN	174_1	sp|Q9BVC6|TM109_HUMAN	4.07786	NA	26193.6	EAPVDVLTQIGR	1	1	1	0.0494	15262	-	Transmembrane protein 109 OS=Homo sapiens OX=9606 GN=TMEM109 PE=1 SV=1	564.416	56.4416	TMEM109	sp|Q9BVC6|TM109_HUMAN	338_1	sp|Q9BVC6|TM109_HUMAN	4.42758	NA	26193.6	EAPVDVLTQIGR	1	1	1	0.0494	16190	-	Transmembrane protein 109 OS=Homo sapiens OX=9606 GN=TMEM109 PE=1 SV=1	265.899	26.5899
sp|P05141|ADT2_HUMAN	114_1	sp|P05141|ADT2_HUMAN	4.07786	NA	32831.2	EQGVLSFWR	1	1	1	0.0302	10565	sp|P12236|ADT3_HUMAN	ADP/ATP translocase 2 OS=Homo sapiens OX=9606 GN=SLC25A5 PE=1 SV=7	949.668	47.4834	SLC25A5	sp|P05141|ADT2_HUMAN	123_2	sp|P05141|ADT2_HUMAN	8.85516	NA	32831.2	AAYFGIYDTAK;DFLAGGVAAAISK;EQGVLSFWR;TAVAPIER	1;1;0;0	2	2	0.1376	13733;13757;10641;3080	-	ADP/ATP translocase 2 OS=Homo sapiens OX=9606 GN=SLC25A5 PE=1 SV=7	541.241	27.062
sp|Q7Z3E5|ARMC9_HUMAN	169_1	sp|Q7Z3E5|ARMC9_HUMAN	2.39178	NA	91761	ASVLAPLFSSCGPQQASRPGSTASSTR	1	1	1	0.033	21040	-	LisH domain-containing protein ARMC9 OS=Homo sapiens OX=9606 GN=ARMC9 PE=1 SV=3	35.5682	0.671098	ARMC9
sp|Q8N4N3|KLH36_HUMAN	135_1	sp|Q8N4N3|KLH36_HUMAN	2.03652	NA	69851.7	TVQVYDREADK	1	1	1	0.0179	15776	-	Kelch-like protein 36 OS=Homo sapiens OX=9606 GN=KLHL36 PE=1 SV=1	1135.39	30.6862	KLHL36
sp|P26373|RL13_HUMAN	233_1	sp|P26373|RL13_HUMAN	3.03647	NA	24246.5	GFSLEELR	1	1	1	0.0379	5680	-	60S ribosomal protein L13 OS=Homo sapiens OX=9606 GN=RPL13 PE=1 SV=4	1156.53	82.609	RPL13	sp|P26373|RL13_HUMAN	462_1	sp|P26373|RL13_HUMAN	8.85516	NA	24246.5	GFSLEELR;VATWFNQPAR	1;1	2	3	0.0853	5525;12771;12772	-	60S ribosomal protein L13 OS=Homo sapiens OX=9606 GN=RPL13 PE=1 SV=4	701.357	50.0969
sp|P34897|GLYM_HUMAN	262_1	sp|P34897|GLYM_HUMAN	2.3325	NA	55957.7	SAITPGGLR	1	1	1	0.0179	3580	-	Serine hydroxymethyltransferase, mitochondrial OS=Homo sapiens OX=9606 GN=SHMT2 PE=1 SV=3	843.584	25.5632	SHMT2	sp|P34897|GLYM_HUMAN	521_1	sp|P34897|GLYM_HUMAN	18.2975	NA	55957.7	AFPMPGFDEH;EYSLQVLK;GWTGQESLSDSDPEMWELLQR;SAITPGGLR;SGLIFYR;TGLIDYNQLALTAR	1;1;1;1;1;1	6	6	0.1369	11434;6335;23043;3465;3060;21648	-	Serine hydroxymethyltransferase, mitochondrial OS=Homo sapiens OX=9606 GN=SHMT2 PE=1 SV=3	1876.67	56.8688
sp|P04792|HSPB1_HUMAN	112_1	sp|P04792|HSPB1_HUMAN	8.15573	NA	22768.5	LFDQAFGLPR;QLSSGVSEIR	1;1	2	2	0.0976	11774;9241	-	Heat shock protein beta-1 OS=Homo sapiens OX=9606 GN=HSPB1 PE=1 SV=2	1668.99	139.083	HSPB1	sp|P04792|HSPB1_HUMAN	218_1	sp|P04792|HSPB1_HUMAN	19.2819	NA	22768.5	DGVVEITGK;LATQSNEITIPVTFESR;LFDQAFGLPR;QLSSGVSEIR;VSLDVNHFAPDELTVK	1;1;1;1;1	5	7	0.3024	4613;25452;11945;11946;9185;9186;24495	-	Heat shock protein beta-1 OS=Homo sapiens OX=9606 GN=HSPB1 PE=1 SV=2	2883.41	240.284
sp|P52272|HNRPM_HUMAN	267_1	sp|P52272|HNRPM_HUMAN	9.10941	NA	77464.3	FESPEVAER;MGPVMDR;QGGGGGGGSVPGIER	1;1;1	3	3	0.0425	8889;1899;14970	-	Heterogeneous nuclear ribonucleoprotein M OS=Homo sapiens OX=9606 GN=HNRNPM PE=1 SV=3	807.908	15.5367	HNRNPM	sp|P52272|HNRPM_HUMAN	531_1	sp|P52272|HNRPM_HUMAN	2.67772	NA	77464.3	AFITNIPFDVK	1	1	1	0.0151	15202	-	Heterogeneous nuclear ribonucleoprotein M OS=Homo sapiens OX=9606 GN=HNRNPM PE=1 SV=3	224.851	4.32406
sp|P42704|LPPRC_HUMAN	179_1	sp|P42704|LPPRC_HUMAN	10.1508	NA	157805	SNTLPISLQSIR;SSLLLGFR;TVLDQQQTPSR	1;1;1	3	3	0.0222	15874;4132;14731	-	Leucine-rich PPR motif-containing protein, mitochondrial OS=Homo sapiens OX=9606 GN=LRPPRC PE=1 SV=3	853.129	8.36401	LRPPRC	sp|P42704|LPPRC_HUMAN	342_1	sp|P42704|LPPRC_HUMAN	66.1851	NA	157805	DIQEESTFSSR;DLPVTEAVFSALVTGHAR;EGNQEVPFDVPELWYEDEK;FSPTDFLAK;GDVENIEVVQK;IQEENVIPR;LDDLFLK;LDSSAVLDTGK;LQDAINILK;NNNIDAAIENIENMLTSENK;NVQGIIEILK;SEAANGNLDFVLSFLK;SGGLGGSHALLLLR;SSLLLGFR;SVLELIPELNEK;TVQLTSSELESTLETLK;VEDALNLK;VIEEQLEPAVEK	1;1;1;1;1;1;1;1;1;1;1;1;1;1;1;1;1;1	18	20	0.1585	16196;14900;27377;7660;14024;9879;9881;3288;10131;7736;27176;10818;23942;17627;3993;18394;25264;4198;18392;18391	-	Leucine-rich PPR motif-containing protein, mitochondrial OS=Homo sapiens OX=9606 GN=LRPPRC PE=1 SV=3	5155.65	50.5456
sp|P61019|RAB2A_HUMAN	261_1	sp|P61019|RAB2A_HUMAN	4.07786	NA	23530.8	TASNVEEAFINTAK	1	1	1	0.066	18266	-	Ras-related protein Rab-2A OS=Homo sapiens OX=9606 GN=RAB2A PE=1 SV=1	672.505	44.8337	RAB2A	sp|P61019|RAB2A_HUMAN	520_1	sp|P61019|RAB2A_HUMAN	4.42758	NA	23530.8	TASNVEEAFINTAK	1	1	1	0.066	20668	-	Ras-related protein Rab-2A OS=Homo sapiens OX=9606 GN=RAB2A PE=1 SV=1	294.33	19.622
sp|P23284|PPIB_HUMAN	73_1	sp|P23284|PPIB_HUMAN	12.2473	NA	23727.5	DTNGSQFFITTVK;TAWLDGK;TVDNFVALATGEK;VLEGMEVVR	1;1;1;1	4	5	0.1944	17852;1601;16548;16547;7972	-	Peptidyl-prolyl cis-trans isomerase B OS=Homo sapiens OX=9606 GN=PPIB PE=1 SV=2	3276.32	204.77	PPIB	sp|P23284|PPIB_HUMAN	138_1	sp|P23284|PPIB_HUMAN	8.85516	NA	23727.5	DFMIQGGDFTR;VIFGLFGK	1;1	2	2	0.088	15833;3704	-	Peptidyl-prolyl cis-trans isomerase B OS=Homo sapiens OX=9606 GN=PPIB PE=1 SV=2	339.48	21.2175
sp|P35232|PHB_HUMAN	107_1	sp|P35232|PHB_HUMAN	2.62098	NA	29785.9	AAIISAEGDSK	1	1	1	0.0404	8833	-	Prohibitin OS=Homo sapiens OX=9606 GN=PHB PE=1 SV=1	159.043	8.83574	PHB	sp|P35232|PHB_HUMAN	208_1	sp|P35232|PHB_HUMAN	22.8226	NA	29785.9	AAIISAEGDSK;DLQNVNITLR;EFTEAVEAK;FDAGELITQR;IFTSIGEDYDER;LEAAEDIAYQLSR;VLPSITTEILK	1;1;1;1;1;1;1	7	9	0.2794	8765;12657;7603;11498;19674;19673;20386;13547;13548	-	Prohibitin OS=Homo sapiens OX=9606 GN=PHB PE=1 SV=1	2001.34	111.185
sp|Q9HCC0|MCCB_HUMAN	49_1	sp|Q9HCC0|MCCB_HUMAN	25.8176	NA	61294.4	AFYGDTLVTGFAR;AQEIAMQNR;EYEAEGIAK;FLYIWPNAR;QGTIFLAGPPLVK;TFYNQAIMSSK;VWDDGIIDPADTR	1;1;1;1;1;1;1	7	11	0.1368	17362;8801;7321;12267;16116;16114;16115;15787;15082;18016;18013	-	Methylcrotonoyl-CoA carboxylase beta chain, mitochondrial OS=Homo sapiens OX=9606 GN=MCCC2 PE=1 SV=1	5784.29	170.126	MCCC2	sp|Q9HCC0|MCCB_HUMAN	86_1	sp|Q9HCC0|MCCB_HUMAN	49.3544	NA	61294.4	AATGEEVSAEDLGGADLHCR;AFYGDTLVTGFAR;AQEIAMQNR;FEEEGNPYYSSAR;IFGYPVGIVGNNGVLFSESAK;LPCIYLVDSGGAYLPR;QADVFPDR;QFSSADEAALKEPIIK;QGTIFLAGPPLVK;TDFGIFR;TFYNQAIMSSK;VWDDGIIDPADTR	1;1;1;1;1;1;1;1;1;1;1;1	12	16	0.2842	26364;19109;8723;21636;26878;24599;5426;5427;11994;17369;17368;17370;3051;15919;20231;20230	-	Methylcrotonoyl-CoA carboxylase beta chain, mitochondrial OS=Homo sapiens OX=9606 GN=MCCC2 PE=1 SV=1	6427.68	189.049
sp|P50995|ANX11_HUMAN	221_1	sp|P50995|ANX11_HUMAN	12.2336	NA	54355.1	GTITDAPGFDPLR;LLISLSQGNR;SETDLLDIR	1;1;1	3	3	0.0634	16471;9971;8841	-	Annexin A11 OS=Homo sapiens OX=9606 GN=ANXA11 PE=1 SV=1	3585.27	162.967	ANXA11	sp|P50995|ANX11_HUMAN	435_1	sp|P50995|ANX11_HUMAN	38.2457	NA	54355.1	AHLVAVFNEYQR;DAQELYAAGENR;DESTNVDMSLAQR;GTITDAPGFDPLR;GVGTDEACLIEILASR;LLISLSQGNR;QQILLSFK;SETDLLDIR;SLYHDISGDTSGDYR;TPVLFDIYEIK	1;1;1;1;1;1;1;1;1;1	10	10	0.2356	19741;17261;20097;17843;23726;9985;6253;8770;23528;17301	-	Annexin A11 OS=Homo sapiens OX=9606 GN=ANXA11 PE=1 SV=1	2189.6	99.5274
sp|P06576|ATPB_HUMAN	185_1	sp|P06576|ATPB_HUMAN	9.62635	NA	56524.6	FTQAGSEVSALLGR;IGLFGGAGVGK;TIAMDGTEGLVR	1;1;1	3	3	0.0699	17621;6398;14521	-	ATP synthase subunit beta, mitochondrial OS=Homo sapiens OX=9606 GN=ATP5F1B PE=1 SV=3	4672.49	155.75	ATP5F1B	sp|P06576|ATPB_HUMAN	361_1	sp|P06576|ATPB_HUMAN	55.2099	NA	56524.6	AIAELGIYPAVDPLDSTSR;DQEGQDVLLFIDNIFR;EGNDLYHEMIESGVINLK;FTQAGSEVSALLGR;IMDPNIVGSEHYDVAR;IMNVIGEPIDER;IPVGPETLGR;SLQDIIAILGMDELSEEDK;TIAMDGTEGLVR;TVLIMELINNVAK;VALTGLTVAEYFR;VALVYGQMNEPPGAR;VVDLLAPYAK	1;1;1;1;1;1;1;1;1;1;1;1;1	13	18	0.3535	25973;25972;25563;26379;19515;24759;18425;18426;18739;8072;8070;26640;15129;19944;19589;22485;9613;9614	-	ATP synthase subunit beta, mitochondrial OS=Homo sapiens OX=9606 GN=ATP5F1B PE=1 SV=3	3907.17	130.239
sp|P35527|K1C9_HUMAN	122_1	sp|P35527|K1C9_HUMAN	66.6514	NA	62026.8	EIETYHNLLEGGQEDFESSGAGK;FEMEQNLR;FSSSGGGGGGGR;FSSSSGYGGGSSR;GGSGGSHGGGSGFGGESGGSYGGGEEASGSGGGYGGGSGK;GGSGGSYGGGGSGGGYGGGSGSR;HGVQELEIELQSQLSK;MTLDDFR;NYSPYYNTIDDLK;QEYEQLIAK;QFSSSYLSR;QGVDADINGLR;QVLDNLTMEK;SGGGGGGGLGSGGSIR;STMQELNSR;TLLDIDNTR;TLNDMR;VQALEEANNDLENK	1;1;1;1;1;1;1;1;1;1;1;1;1;1;1;1;1;1	18	43	0.3981	20960;8971;8972;9419;9420;6552;13791;13792;21144;21147;21145;20040;20039;20038;20172;4239;4240;4241;19157;10575;10577;10576;9192;9191;11595;11594;11593;11627;11112;12583;13702;13703;13701;13706;9387;9388;8819;833;19034;19033;19035;19042;19040	-	Keratin, type I cytoskeletal 9 OS=Homo sapiens OX=9606 GN=KRT9 PE=1 SV=3	146428	4880.95	KRT9	sp|P35527|K1C9_HUMAN	16_7	sp|P35527|K1C9_HUMAN	121.281	NA	62026.8	DIENQYETQITQIEHEVSSSGQEVQSSAK;DQIVDLTVGNNK;EIETYHNLLEGGQEDFESSGAGK;FEMEQNLR;FSSSGGGGGGGR;FSSSSGYGGGSSR;GGSGGSHGGGSGFGGESGGSYGGGEEASGSGGGYGGGSGK;GGSGGSYGGGGSGGGYGGGSGSR;HGVQELEIELQSQLSK;HGVQELEIELQSQLSKK;IKFEMEQNLR;IQDWYDK;IQDWYDKK;KDIENQYETQITQIEHEVSSSGQEVQSSAK;LASYLDK;LASYLDKVQALEEANNDLENK;MTLDDFR;NYSPYYNTIDDLK;QEIECQNQEYSLLLSIK;QEYEQLIAK;QGVDADINGLR;QVLDNLTMEK;SDLEMQYETLQEELMALK;SDLEMQYETLQEELM…	1;1;1;1;1;1;1;1;1;1;1;1;1;1;0;1;1;1;1;1;1;1;1;1;1;1;1;1;1;1	29	105	0.5602	28351;16727;16683;16684;27756;27754;27755;9383;9385;9387;8896;8895;9386;6404;14195;14193;14194;28342;28341;24569;24570;24945;24946;24943;24944;24940;24939;24947;25856;16499;16917;16916;5973;5972;9814;28389;1987;1989;27511;4085;4086;4081;4084;22530;22529;22532;26531;10646;10647;10648;10092;11752;11751;11753;11787;11788;11755;11791;11249;11256;11742;11789;11790;11222;12799;13305;12800;12758;13303;1…	-	Keratin, type I cytoskeletal 9 OS=Homo sapiens OX=9606 GN=KRT9 PE=1 SV=3	57972.9	1932.43
sp|O95197|RTN3_HUMAN	248_1	sp|O95197|RTN3_HUMAN	4.07786	NA	112541	TQIDHYVGIAR	1	1	1	0.0107	14736	-	Reticulon-3 OS=Homo sapiens OX=9606 GN=RTN3 PE=1 SV=2	1049.49	23.322	RTN3
sp|Q9Y3F4|STRAP_HUMAN	134_1	sp|Q9Y3F4|STRAP_HUMAN	15.5603	NA	38414	EFLVAGGEDFK;GAVWGATLNK;SFEAPATINSASLHPEK;VWDAVSGDELMTLAHK;YDYNSGEELESYK	1;1;1;1;1	5	6	0.1914	13201;7554;20063;20065;19950;19107	-	Serine-threonine kinase receptor-associated protein OS=Homo sapiens OX=9606 GN=STRAP PE=1 SV=1	3725.57	169.344	STRAP	sp|Q9Y3F4|STRAP_HUMAN	255_1	sp|Q9Y3F4|STRAP_HUMAN	13.2827	NA	38414	EFLVAGGEDFK;TVDFTQDSNYLLTGGQDK;YDYNSGEELESYK	1;1;1	3	3	0.12	13448;26069;22410	-	Serine-threonine kinase receptor-associated protein OS=Homo sapiens OX=9606 GN=STRAP PE=1 SV=1	1315.83	59.8105
sp|P49368|TCPG_HUMAN	203_1	sp|P49368|TCPG_HUMAN	2.62098	NA	60495.3	AVAQALEVIPR	1	1	1	0.0202	11862	-	T-complex protein 1 subunit gamma OS=Homo sapiens OX=9606 GN=CCT3 PE=1 SV=4	326.596	8.82691	CCT3	sp|P49368|TCPG_HUMAN	405_1	sp|P49368|TCPG_HUMAN	15.9605	NA	60495.3	AVAQALEVIPR;EDDVGTGAGLLEIK;ELGIWEPLAVK;TAVETAVLLLR	1;1;1;1	4	4	0.0862	12041;19093;14869;12660	-	T-complex protein 1 subunit gamma OS=Homo sapiens OX=9606 GN=CCT3 PE=1 SV=4	777.982	21.0265
sp|P06748|NPM_HUMAN	173_1	sp|P06748|NPM_HUMAN	2.39178	NA	32554.8	TVSLGAGAK	1	1	1	0.0306	1867	-	Nucleophosmin OS=Homo sapiens OX=9606 GN=NPM1 PE=1 SV=2	100.594	6.28713	NPM1	sp|P06748|NPM_HUMAN	336_1	sp|P06748|NPM_HUMAN	11.1574	NA	32554.8	GPSSVEDIK;MTDQEAIQDLWQWR;VTLATLK	1;1;1	3	3	0.102	5012;24783;764	-	Nucleophosmin OS=Homo sapiens OX=9606 GN=NPM1 PE=1 SV=2	2038.69	127.418
sp|Q5JXB2|UE2NL_HUMAN	216_1	sp|Q5JXB2|UE2NL_HUMAN	3.03647	NA	17366.1	TNEAQAIETAR	1	1	1	0.0719	12960	sp|P61088|UBE2N_HUMAN	Putative ubiquitin-conjugating enzyme E2 N-like OS=Homo sapiens OX=9606 GN=UBE2NL PE=1 SV=1	176.347	14.6956	UBE2NL	sp|Q5JXB2|UE2NL_HUMAN	424_1	sp|Q5JXB2|UE2NL_HUMAN	4.42758	NA	17366.1	WSPALQIR	1	1	1	0.0523	6050	sp|P61088|UBE2N_HUMAN	Putative ubiquitin-conjugating enzyme E2 N-like OS=Homo sapiens OX=9606 GN=UBE2NL PE=1 SV=1	224.941	18.7451
sp|P46782|RS5_HUMAN	75_1	sp|P46782|RS5_HUMAN	4.07786	NA	22862.1	QAVDVSPLR	1	1	1	0.0441	6622	-	40S ribosomal protein S5 OS=Homo sapiens OX=9606 GN=RPS5 PE=1 SV=4	1357.1	135.71	RPS5	sp|P46782|RS5_HUMAN	145_1	sp|P46782|RS5_HUMAN	8.85516	NA	22862.1	QAVDVSPLR;TIAECLADELINAAK	1;1	2	2	0.1176	6480;22891	-	40S ribosomal protein S5 OS=Homo sapiens OX=9606 GN=RPS5 PE=1 SV=4	983.745	98.3745
sp|P30048|PRDX3_HUMAN	168_1	sp|P30048|PRDX3_HUMAN	7.11433	NA	27675.2	GLFIIDPNGVIK;HLSVNDLPVGR	1;1	2	2	0.0898	15014;13065	-	Thioredoxin-dependent peroxide reductase, mitochondrial OS=Homo sapiens OX=9606 GN=PRDX3 PE=1 SV=3	2534.96	194.997	PRDX3	sp|P30048|PRDX3_HUMAN	318_1	sp|P30048|PRDX3_HUMAN	14.9191	NA	27675.2	DYGVLLEGSGLALR;GLFIIDPNGVIK;GTAVVNGEFK;HLSVNDLPVGR	1;1;1;1	4	6	0.1836	20058;15851;15853;7559;7560;13323	-	Thioredoxin-dependent peroxide reductase, mitochondrial OS=Homo sapiens OX=9606 GN=PRDX3 PE=1 SV=3	868.281	66.7908
sp|P62917|RL8_HUMAN	200_1	sp|P62917|RL8_HUMAN	2.62098	NA	28007.3	VGLIAAR	1	1	1	0.0272	20	-	60S ribosomal protein L8 OS=Homo sapiens OX=9606 GN=RPL8 PE=1 SV=2	538.54	38.4672	RPL8	sp|P62917|RL8_HUMAN	399_1	sp|P62917|RL8_HUMAN	2.28287	NA	28007.3	VGLIAAR	1	1	1	0.0272	18	-	60S ribosomal protein L8 OS=Homo sapiens OX=9606 GN=RPL8 PE=1 SV=2	486.758	34.7685
sp|P13667|PDIA4_HUMAN	163_1	sp|P13667|PDIA4_HUMAN	2.39178	NA	72887	EFVTAFK	1	1	1	0.0109	2707	-	Protein disulfide-isomerase A4 OS=Homo sapiens OX=9606 GN=PDIA4 PE=1 SV=2	528.6	11.4913	PDIA4	sp|P13667|PDIA4_HUMAN	313_1	sp|P13667|PDIA4_HUMAN	22.8291	NA	72887	DGDDVIIIGVFK;EFVTAFK;FAMEPEEFDSDTLR;FDVSGYPTIK;TFDSIVMDPK;VSQGQLVVMQPEK	1;1;1;1;1;1	6	6	0.1023	15970;2700;23539;10803;11598;19640	-	Protein disulfide-isomerase A4 OS=Homo sapiens OX=9606 GN=PDIA4 PE=1 SV=2	1120.75	24.364
sp|Q8TD47|RS4Y2_HUMAN	44_1	sp|Q8TD47|RS4Y2_HUMAN	3.03647	NA	29276.9	DANGNSFATR	1	1	1	0.038	8582	sp|P62701|RS4X_HUMAN;sp|P22090|RS4Y1_HUMAN	40S ribosomal protein S4, Y isoform 2 OS=Homo sapiens OX=9606 GN=RPS4Y2 PE=2 SV=3	43.3181	2.06277	RPS4Y2
sp|Q12931|TRAP1_HUMAN	12_1	sp|Q12931|TRAP1_HUMAN	4.07786	NA	80059.7	GVVDSEDIPLNLSR	1	1	1	0.0199	18436	-	Heat shock protein 75 kDa, mitochondrial OS=Homo sapiens OX=9606 GN=TRAP1 PE=1 SV=3	12543.2	261.317	TRAP1	sp|Q12931|TRAP1_HUMAN	24_1	sp|Q12931|TRAP1_HUMAN	12.7749	NA	80059.7	ATDILPK;ETEELMAWMR;GVVDSEDIPLNLSR;LDTHPAMVTVLEMGAAR	1;1;1;1	4	5	0.0682	957;16108;21016;21017;13363	-	Heat shock protein 75 kDa, mitochondrial OS=Homo sapiens OX=9606 GN=TRAP1 PE=1 SV=3	2665.45	55.5301
sp|O14744|ANM5_HUMAN	187_1	sp|O14744|ANM5_HUMAN	2.39178	NA	72637.5	AAILPTSIFLTNK	1	1	1	0.0204	16949	-	Protein arginine N-methyltransferase 5 OS=Homo sapiens OX=9606 GN=PRMT5 PE=1 SV=4	321.957	8.70154	PRMT5
sp|P04908|H2A1B_HUMAN	6_1	sp|P04908|H2A1B_HUMAN	4.07786	NA	14126.9	AGLQFPVGR	1	1	1	0.0692	5486	sp|P0C0S5|H2AZ_HUMAN;sp|Q99878|H2A1J_HUMAN;sp|Q96QV6|H2A1A_HUMAN;sp|Q7L7L0|H2A3_HUMAN;sp|Q71UI9|H2AV_HUMAN;sp|Q93077|H2A1C_HUMAN;sp|Q96KK5|H2A1H_HUMAN;sp|Q6FI13|H2A2A_HUMAN;sp|Q16777|H2A2C_HUMAN;sp|P16104|H2AX_HUMAN;sp|P0C0S8|H2A1_HUMAN;sp|Q8IUE6|H2A2B_HUMAN;sp|Q9BTM1|H2AJ_HUMAN;sp|P20671|H2A1D_HUMAN	Histone H2A type 1-B/E OS=Homo sapiens OX=9606 GN=H2AC4 PE=1 SV=2	3028.2	432.6	H2AC4	sp|P04908|H2A1B_HUMAN	9_1	sp|P04908|H2A1B_HUMAN	2.55024	NA	14126.9	AGLQFPVGR	1	1	2	0.0692	5358;5356	sp|P0C0S5|H2AZ_HUMAN;sp|Q99878|H2A1J_HUMAN;sp|Q96QV6|H2A1A_HUMAN;sp|Q7L7L0|H2A3_HUMAN;sp|Q71UI9|H2AV_HUMAN;sp|Q93077|H2A1C_HUMAN;sp|Q96KK5|H2A1H_HUMAN;sp|Q6FI13|H2A2A_HUMAN;sp|Q16777|H2A2C_HUMAN;sp|P16104|H2AX_HUMAN;sp|P0C0S8|H2A1_HUMAN;sp|Q8IUE6|H2A2B_HUMAN;sp|Q9BTM1|H2AJ_HUMAN;sp|P20671|H2A1D_HUMAN	Histone H2A type 1-B/E OS=Homo sapiens OX=9606 GN=H2AC4 PE=1 SV=2	1446.02	206.574
sp|Q15019|SEPT2_HUMAN	245_1	sp|Q15019|SEPT2_HUMAN	2.62098	NA	41461.2	VNIVPVIAK	1	1	1	0.0249	5743	-	Septin-2 OS=Homo sapiens OX=9606 GN=SEPTIN2 PE=1 SV=1	431.195	20.5331	SEPTIN2	sp|Q15019|SEPT2_HUMAN	486_1	sp|Q15019|SEPT2_HUMAN	7.54795	NA	41461.2	TIISYIDEQFER;VNIVPVIAK	1;1	2	2	0.0582	21008;5599	-	Septin-2 OS=Homo sapiens OX=9606 GN=SEPTIN2 PE=1 SV=1	260.717	12.4151
sp|P05455|LA_HUMAN	129_1	sp|P05455|LA_HUMAN	4.07786	NA	46808.2	IIEDQQESLNK	1	1	1	0.027	15628	-	Lupus La protein OS=Homo sapiens OX=9606 GN=SSB PE=1 SV=2	42.6684	1.47132	SSB	sp|P05455|LA_HUMAN	248_1	sp|P05455|LA_HUMAN	21.9529	NA	46808.2	DANNGNLQLR;EGIILFK;ETDLLILFK;EVTWEVLEGEVEK;GSIFVVFDSIESAK;LTTDFNVIVEALSK	1;1;1;1;1;1	6	6	0.1642	10412;2220;9708;21607;20750;21672	-	Lupus La protein OS=Homo sapiens OX=9606 GN=SSB PE=1 SV=2	1057.73	36.4734
sp|O15145|ARPC3_HUMAN	246_1	sp|O15145|ARPC3_HUMAN	4.07786	NA	20533.4	LIGNMALLPIR	1	1	1	0.0618	13194	-	Actin-related protein 2/3 complex subunit 3 OS=Homo sapiens OX=9606 GN=ARPC3 PE=1 SV=3	1033.05	86.0872	ARPC3	sp|O15145|ARPC3_HUMAN	489_1	sp|O15145|ARPC3_HUMAN	4.42758	NA	20533.4	DTDIVDEAIYYFK	1	1	1	0.073	22336	-	Actin-related protein 2/3 complex subunit 3 OS=Homo sapiens OX=9606 GN=ARPC3 PE=1 SV=3	31.3648	2.61374
sp|Q16658|FSCN1_HUMAN	159_1	sp|Q16658|FSCN1_HUMAN	7.11433	NA	54496.1	LVARPEPATGYTLEFR;YLTAEAFGFK	1;1	2	2	0.0527	20123;11271	-	Fascin OS=Homo sapiens OX=9606 GN=FSCN1 PE=1 SV=3	1215.11	41.9003	FSCN1	sp|Q16658|FSCN1_HUMAN	299_1	sp|Q16658|FSCN1_HUMAN	11.5329	NA	54496.1	SSYDVFQLEFNDGAYNIK;YLAPSGPSGTLK;YLTAEAFGFK	1;1;1	3	3	0.0811	26592;12815;11408	-	Fascin OS=Homo sapiens OX=9606 GN=FSCN1 PE=1 SV=3	838.316	28.9074
sp|P61353|RL27_HUMAN	42_1	sp|P61353|RL27_HUMAN	3.03647	NA	15787.7	YSVDIPLDK	1	1	1	0.0662	8501	-	60S ribosomal protein L27 OS=Homo sapiens OX=9606 GN=RPL27 PE=1 SV=2	768.026	128.004	RPL27	sp|P61353|RL27_HUMAN	71_1	sp|P61353|RL27_HUMAN	6.61596	NA	15787.7	VVLVLAGR;YSVDIPLDK	1;1	2	2	0.125	2348;8420	-	60S ribosomal protein L27 OS=Homo sapiens OX=9606 GN=RPL27 PE=1 SV=2	519.779	86.6298
sp|P62805|H4_HUMAN	21_1	sp|P62805|H4_HUMAN	2.39178	NA	11360.4	TVTAMDVVYALK	1	1	1	0.1165	15517	-	Histone H4 OS=Homo sapiens OX=9606 GN=H4C1 PE=1 SV=2	1316.41	219.401	H4C1	sp|P62805|H4_HUMAN	35_1	sp|P62805|H4_HUMAN	2.21929	NA	11360.4	VFLENVIR	1	1	1	0.0777	6663	-	Histone H4 OS=Homo sapiens OX=9606 GN=H4C1 PE=1 SV=2	833.3	138.883
sp|P40926|MDHM_HUMAN	160_1	sp|P40926|MDHM_HUMAN	9.73531	NA	35480.7	AGAGSATLSMAYAGAR;NSPLVSR;VNVPVIGGHAGK	1;1;1	3	3	0.1036	17819;1230;11326	-	Malate dehydrogenase, mitochondrial OS=Homo sapiens OX=9606 GN=MDH2 PE=1 SV=3	2190	91.2499	MDH2	sp|P40926|MDHM_HUMAN	309_1	sp|P40926|MDHM_HUMAN	27.8152	NA	35480.7	ANTFVAELK;FVFSLVDAMNGK;GYLGPEQLPDCLK;IFGVTTLDIVR;LTLYDIAHTPGVAADLSHIETK;MISDAIPELK;VNVPVIGGHAGK	1;1;1;1;1;1;1	7	9	0.2633	6739;17041;20569;14162;14163;27480;10474;11462;11460	-	Malate dehydrogenase, mitochondrial OS=Homo sapiens OX=9606 GN=MDH2 PE=1 SV=3	2767.23	115.301
sp|Q14103|HNRPD_HUMAN	121_1	sp|Q14103|HNRPD_HUMAN	4.07786	NA	38410.3	IFVGGLSPDTPEEK	1	1	1	0.0394	18204	-	Heterogeneous nuclear ribonucleoprotein D0 OS=Homo sapiens OX=9606 GN=HNRNPD PE=1 SV=1	1822.27	121.484	HNRNPD	sp|Q14103|HNRPD_HUMAN	79_3	sp|Q14103|HNRPD_HUMAN	9.83298	NA	38410.3	EYFGGFGEVESIELPMDNK;GFCFITFK;GFGFVLFK;IFVGGLSPDTPEEK	1;1;0;1	3	4	0.138	26832;7490;4518;20558;20557	-	Heterogeneous nuclear ribonucleoprotein D0 OS=Homo sapiens OX=9606 GN=HNRNPD PE=1 SV=1	1199.49	79.9661
sp|Q15084|PDIA6_HUMAN	180_1	sp|Q15084|PDIA6_HUMAN	8.15573	NA	48091.3	DVIELTDDSFDK;LAAVDATVNQVLASR	1;1	2	2	0.0614	17053;18567	-	Protein disulfide-isomerase A6 OS=Homo sapiens OX=9606 GN=PDIA6 PE=1 SV=1	1567.1	62.684	PDIA6	sp|Q15084|PDIA6_HUMAN	344_1	sp|Q15084|PDIA6_HUMAN	24.6289	NA	48091.3	ALDLFSDNAPPPELLEIINEDIAK;DVIELTDDSFDK;GSFSEQGINEFLR;GSTAPVGGGAFPTIVER;LAAVDATVNQVLASR;NSYLEVLLK	1;1;1;1;1;1	6	6	0.2045	27937;18652;20469;22681;21274;9291	-	Protein disulfide-isomerase A6 OS=Homo sapiens OX=9606 GN=PDIA6 PE=1 SV=1	869.988	34.7995
sp|Q99623|PHB2_HUMAN	189_1	sp|Q99623|PHB2_HUMAN	4.07786	NA	33275.9	FNASQLITQR	1	1	1	0.0334	12200	-	Prohibitin-2 OS=Homo sapiens OX=9606 GN=PHB2 PE=1 SV=2	635.476	24.4414	PHB2	sp|Q99623|PHB2_HUMAN	368_1	sp|Q99623|PHB2_HUMAN	17.132	NA	33275.9	DLQMVNISLR;FNASQLITQR;IGGVQQDTILAEGLHFR;IYLTADNLVLNLQDESFTR;VLPSIVNEVLK	1;1;1;1;1	5	6	0.2241	12747;12396;25064;27093;13442;13443	-	Prohibitin-2 OS=Homo sapiens OX=9606 GN=PHB2 PE=1 SV=2	782.425	30.0933
sp|P36578|RL4_HUMAN	243_1	sp|P36578|RL4_HUMAN	8.6618	NA	47667.4	IEEVPELPLVVEDK;NIPGITLLNVSK;NVTLPAVFK	1;1;1	3	3	0.082	19183;14660;6749	-	60S ribosomal protein L4 OS=Homo sapiens OX=9606 GN=RPL4 PE=1 SV=5	3955.1	131.837	RPL4	sp|P36578|RL4_HUMAN	478_1	sp|P36578|RL4_HUMAN	8.85516	NA	47667.4	IEEVPELPLVVEDK;NIPGITLLNVSK	1;1	2	2	0.0609	22595;15343	-	60S ribosomal protein L4 OS=Homo sapiens OX=9606 GN=RPL4 PE=1 SV=5	662.646	22.0882
sp|Q16555|DPYL2_HUMAN	46_1	sp|Q16555|DPYL2_HUMAN	8.90713	NA	62254.6	IVLEDGTLHVTEGSGR;MSVIWDK;MVIPGGIDVHTR	1;1;1	3	3	0.0612	19606;3749;15211	-	Dihydropyrimidinase-related protein 2 OS=Homo sapiens OX=9606 GN=DPYSL2 PE=1 SV=1	4116.72	124.749	DPYSL2	sp|Q16555|DPYL2_HUMAN	80_1	sp|Q16555|DPYL2_HUMAN	31.825	NA	62254.6	FQMPDQGMTSADDFFQGTK;GIQEEMEALVK;GSPLVVISQGK;GTVVYGEPITASLGTDGSHYWSK;IAVGSDADLVIWDPDSVK;IVLEDGTLHVTEGSGR;MSVIWDK;MVIPGGIDVHTR;NLHQSGFSLSGAQIDDNIPR;QIGENLIVPGGVK;VFNLYPR	1;1;1;1;1;1;1;1;1;1;1	11	14	0.2745	26789;26788;14604;9465;9466;27607;25409;23497;3646;16106;26876;16926;16925;4393	-	Dihydropyrimidinase-related protein 2 OS=Homo sapiens OX=9606 GN=DPYSL2 PE=1 SV=1	3371.45	102.165
sp|P30740|ILEU_HUMAN	10_1	sp|P30740|ILEU_HUMAN	4.07786	NA	42714.7	LGVQDLFNSSK	1	1	1	0.029	13089	-	Leukocyte elastase inhibitor OS=Homo sapiens OX=9606 GN=SERPINB1 PE=1 SV=1	777.452	37.0215	SERPINB1	sp|P30740|ILEU_HUMAN	22_1	sp|P30740|ILEU_HUMAN	8.85516	NA	42714.7	LGVQDLFNSSK;VLELPYQGEELSMVILLPDDIEDESTGLK	1;1	2	2	0.1055	13353;28345	-	Leukocyte elastase inhibitor OS=Homo sapiens OX=9606 GN=SERPINB1 PE=1 SV=1	234.335	11.1588
sp|Q00610|CLH1_HUMAN	207_1	sp|Q00610|CLH1_HUMAN	39.8599	NA	191493	EVCFACVDGK;HELIEFR;IVLDNSVFSEHR;LHIIEVGTPPTGNQPFPK;LLLPWLEAR;LLYNNVSNFGR;NLQNLLILTAIK;NNLAGAEELFAR;VANVELYYR;VIQCFAETGQVQK;YIEIYVQK	1;1;1;1;1;1;1;1;1;1;1	11	12	0.0722	12382;5437;17327;20437;10262;15244;16355;15411;15413;10717;18380;8659	-	Clathrin heavy chain 1 OS=Homo sapiens OX=9606 GN=CLTC PE=1 SV=5	10932.4	115.078	CLTC	sp|Q00610|CLH1_HUMAN	410_1	sp|Q00610|CLH1_HUMAN	99.6414	NA	191493	ALEHFTDLYDIK;AYEFAER;EAIDSYIK;EHLELFWSR;ESYVETELIFALAK;GQFSTDELVAEVEK;GQFSTDELVAEVEKR;HDVVFLITK;HELIEFR;ISGETIFVTAPHEATAGIIGVNR;IVLDNSVFSEHR;IYIDSNNNPER;LASTLVHLGEYQAAVDGAR;LECSEELGDLVK;LHIIEVGTPPTGNQPFPK;LLLPWLEAR;LLYNNVSNFGR;LPVVIGGLLDVDCSEDVIK;NLQNLLILTAIK;NNLAGAEELFAR;RPLIDQVVQTALSETQDPEEVSVTVK;SVNESLNNLFITEEDYQALR;VANVELYYR;VGEQAQVVIIDMNDPSNPIR;VIQCFAETGQVQK;VVGAMQLYSVDR;YIEIYVQK	1;1;1;1;1;1;1;1;1;1;1;1;1;1;1;1;1;1;1;1;1;1;1;1;1;1;1	27	33	0.2072	20089;3796;5190;13630;22636;21702;23763;9053;5304;27454;19072;17199;17200;25889;18564;25706;25707;10308;16157;26286;17720;16396;28178;28179;27460;27457;10808;26988;26987;20912;17298;8591;8592	-	Clathrin heavy chain 1 OS=Homo sapiens OX=9606 GN=CLTC PE=1 SV=5	8561.22	90.1182
sp|O60814|H2B1K_HUMAN	7_1	sp|O60814|H2B1K_HUMAN	4.07786	NA	13881.6	QVHPDTGISSK	1	1	1	0.0873	11902	sp|P58876|H2B1D_HUMAN;sp|Q5QNW6|H2B2F_HUMAN;sp|Q99877|H2B1N_HUMAN;sp|P06899|H2B1J_HUMAN;sp|P62807|H2B1C_HUMAN;sp|Q16778|H2B2E_HUMAN;sp|P57053|H2BFS_HUMAN;sp|P33778|H2B1B_HUMAN;sp|Q8N257|H2B3B_HUMAN;sp|Q99880|H2B1L_HUMAN;sp|Q93079|H2B1H_HUMAN;sp|Q99879|H2B1M_HUMAN;sp|P23527|H2B1O_HUMAN;sp|Q96A08|H2B1A_HUMAN	Histone H2B type 1-K OS=Homo sapiens OX=9606 GN=H2BC12 PE=1 SV=3	11.3064	1.02785	H2BC12	sp|O60814|H2B1K_HUMAN	13_1	sp|O60814|H2B1K_HUMAN	12.2413	NA	13881.6	ESYSVYVYK;LLLPGELAK;QVHPDTGISSK	1;1;1	3	5	0.2302	11137;11136;5620;5619;12075	sp|P58876|H2B1D_HUMAN;sp|Q5QNW6|H2B2F_HUMAN;sp|Q99877|H2B1N_HUMAN;sp|P62807|H2B1C_HUMAN;sp|P57053|H2BFS_HUMAN;sp|Q99880|H2B1L_HUMAN;sp|Q93079|H2B1H_HUMAN;sp|Q99879|H2B1M_HUMAN	Histone H2B type 1-K OS=Homo sapiens OX=9606 GN=H2BC12 PE=1 SV=3	1893.73	172.157
sp|Q86YZ3|HORN_HUMAN	127_1	sp|Q86YZ3|HORN_HUMAN	16.3115	NA	282228	GPYESGSGHSSGLGHR;HGSGSGHSSSHGQHGSGSGR;HGSGSGQSSGFGHK;HGSGSGQSSSYSPYGSGSGWSSSR	1;1;1;1	4	4	0.026	19017;20244;15878;20905	-	Hornerin OS=Homo sapiens OX=9606 GN=HRNR PE=1 SV=2	369.474	3.55263	HRNR
sp|P62263|RS14_HUMAN	288_1	sp|P62263|RS14_HUMAN	2.62098	NA	16262.5	IEDVTPIPSDSTR	1	1	2	0.0861	17536;17534	-	40S ribosomal protein S14 OS=Homo sapiens OX=9606 GN=RPS14 PE=1 SV=3	735.229	122.538	RPS14	sp|P62263|RS14_HUMAN	576_1	sp|P62263|RS14_HUMAN	2.06169	NA	16262.5	IEDVTPIPSDSTR	1	1	1	0.0861	19381	-	40S ribosomal protein S14 OS=Homo sapiens OX=9606 GN=RPS14 PE=1 SV=3	198.277	33.0462
sp|Q96EP5|DAZP1_HUMAN	223_1	sp|Q96EP5|DAZP1_HUMAN	2.43749	NA	43356.1	SQAPGQPGASQWGSR	1	1	1	0.0369	18427	-	DAZ-associated protein 1 OS=Homo sapiens OX=9606 GN=DAZAP1 PE=1 SV=1	125.539	9.65688	DAZAP1
sp|P23396|RS3_HUMAN	251_1	sp|P23396|RS3_HUMAN	10.5932	NA	26671.4	AELNEFLTR;DEILPTTPISEQK;IMLPWDPTGK	1;1;1	3	3	0.1317	9743;17994;11599	-	40S ribosomal protein S3 OS=Homo sapiens OX=9606 GN=RPS3 PE=1 SV=2	3660.4	192.653	RPS3	sp|P23396|RS3_HUMAN	501_1	sp|P23396|RS3_HUMAN	24.3155	NA	26671.4	AELNEFLTR;DEILPTTPISEQK;ELAEDGYSGVEVR;FGFPEGSVELYAEK;FVADGIFK;IMLPWDPTGK;TEIIILATR	1;1;1;1;1;1;1	7	9	0.3128	9724;9723;20193;19246;19245;22032;4078;11759;7819	-	40S ribosomal protein S3 OS=Homo sapiens OX=9606 GN=RPS3 PE=1 SV=2	2395.25	126.066
sp|Q96HU8|DIRA2_HUMAN	239_1	sp|Q96HU8|DIRA2_HUMAN	3.03647	NA	22470.6	VAVFGAGGVGK	1	1	1	0.0553	5992	-	GTP-binding protein Di-Ras2 OS=Homo sapiens OX=9606 GN=DIRAS2 PE=1 SV=1	1719.28	114.618	DIRAS2	sp|Q96HU8|DIRA2_HUMAN	471_1	sp|Q96HU8|DIRA2_HUMAN	2.9996	NA	22470.6	VAVFGAGGVGK	1	1	1	0.0553	5840	-	GTP-binding protein Di-Ras2 OS=Homo sapiens OX=9606 GN=DIRAS2 PE=1 SV=1	1812.98	120.865
sp|Q00839|HNRPU_HUMAN	35_1	sp|Q00839|HNRPU_HUMAN	18.4002	NA	90528	MMVAGFK;NFILDQTNVSAAAQR;NGQDLGVAFK;SSGPTSLFAVTVAPPGAR;YNILGTNTIMDK	1;1;1;1;1	5	6	0.0752	1449;19426;8490;19740;19739;16850	-	Heterogeneous nuclear ribonucleoprotein U OS=Homo sapiens OX=9606 GN=HNRNPU PE=1 SV=6	3301.03	75.0233	HNRNPU	sp|Q00839|HNRPU_HUMAN	61_1	sp|Q00839|HNRPU_HUMAN	19.6962	NA	90528	GYFEYIEENK;MCLFAGFQR;NFILDQTNVSAAAQR;NGQDLGVAFK;SSGPTSLFAVTVAPPGAR;TTWVTK	1;1;1;1;1;1	6	7	0.0824	15977;10879;23099;8403;8380;23845;601	-	Heterogeneous nuclear ribonucleoprotein U OS=Homo sapiens OX=9606 GN=HNRNPU PE=1 SV=6	2820.78	64.1086
sp|P07437|TBB5_HUMAN	16_1	sp|P07437|TBB5_HUMAN	32.5164	NA	49639	AILVDLEPGTMDSVR;EVDEQMLNVQNK;FPGQLNADLR;IMNTFSVVPSPK;ISEQFTAMFR;ISVYYNEATGGK;LAVNMVPFPR;LHFFMPGFAPLTSR;YLTVAAVFR	1;1;1;1;1;1;1;1;1	9	20	0.2342	19225;17906;17905;10837;10839;10835;10833;10834;10838;15713;15712;13643;15336;15335;11186;11185;11187;19251;19363;8217	-	Tubulin beta chain OS=Homo sapiens OX=9606 GN=TUBB PE=1 SV=2	23769.7	1131.89	TUBB	sp|P07437|TBB5_HUMAN	29_3	sp|P07437|TBB5_HUMAN	13.2827	NA	49639	AILVDLEPGTMDSVR;ALTVPELTQQVFDAK;EVDEQMLNVQNK;FPGQLNADLR;FWEVISDEHGIDPTGTYHGDSDLQLDR;GHYTEGAELVDSVLDVVR;IMNTFSVVPSPK;ISEQFTAMFR;ISVYYNEATGGK;LAVNMVPFPR;NSSYFVEWIPNNVK;TAVCDIPPR;YLTVAAVFR	0;1;0;0;1;0;0;0;1;0;0;0;0	3	3	0.3896	22679;22678;22677;22683;22890;23251;19726;19727;10923;10922;10921;10924;10920;10927;10928;28312;25794;16809;16810;16808;14014;16288;11322;11321;11843;11845;23659;23666;23667;7746;7745;8110	-	Tubulin beta chain OS=Homo sapiens OX=9606 GN=TUBB PE=1 SV=2	1523.05	72.5262
sp|Q07020|RL18_HUMAN	182_1	sp|Q07020|RL18_HUMAN	4.07786	NA	21621.1	ILTFDQLALDSPK	1	1	1	0.0691	17892	-	60S ribosomal protein L18 OS=Homo sapiens OX=9606 GN=RPL18 PE=1 SV=2	972.701	108.078	RPL18	sp|Q07020|RL18_HUMAN	356_1	sp|Q07020|RL18_HUMAN	12.2413	NA	21621.1	ILTFDQLALDSPK;TAVVVGTITDDVR;TNSTFNQVVLK	1;1;1	3	4	0.1968	20019;17515;17514;14733	-	60S ribosomal protein L18 OS=Homo sapiens OX=9606 GN=RPL18 PE=1 SV=2	866.663	96.2959
sp|P26641|EF1G_HUMAN	167_1	sp|P26641|EF1G_HUMAN	14.6254	NA	50087.1	ALIAAQYSGAQVR;LDPGSEETQTLVR;STFVLDEFK;VLSAPPHFHFGQTNR	1;1;1;1	4	4	0.1144	16248;17716;9515;19715	-	Elongation factor 1-gamma OS=Homo sapiens OX=9606 GN=EEF1G PE=1 SV=3	6446.76	238.769	EEF1G	sp|P26641|EF1G_HUMAN	319_1	sp|P26641|EF1G_HUMAN	22.8268	NA	50087.1	ALIAAQYSGAQVR;DPFAHLPK;EYFSWEGAFQHVGK;GQELAFPLSPDWQVDYESYTWR;ILGLLDAYLK;STFVLDEFK	1;1;1;1;1;1	6	6	0.1739	17566;4826;23515;27980;10561;9473	-	Elongation factor 1-gamma OS=Homo sapiens OX=9606 GN=EEF1G PE=1 SV=3	1576.17	58.3766
sp|P27797|CALR_HUMAN	218_1	sp|P27797|CALR_HUMAN	4.07786	NA	48111.8	EQFLDGDGWTSR	1	1	1	0.0288	17238	-	Calreticulin OS=Homo sapiens OX=9606 GN=CALR PE=1 SV=1	1936.89	80.7038	CALR	sp|P27797|CALR_HUMAN	427_1	sp|P27797|CALR_HUMAN	18.3239	NA	48111.8	EQFLDGDGWTSR;FVLSSGK;IDDPTDSKPEDWDKPEHIPDPDAK;KPEDWDEEMDGEWEPPVIQNPEYK;SGTIFDNFLITNDEAYAEEFGNETWGVTK	1;1;1;1;1	5	6	0.2302	18949;639;28061;28062;28255;28356	-	Calreticulin OS=Homo sapiens OX=9606 GN=CALR PE=1 SV=1	1541.12	64.2134
sp|P14868|SYDC_HUMAN	199_1	sp|P14868|SYDC_HUMAN	2.75956	NA	57100	VFSIGPVFR	1	1	1	0.018	7691	-	Aspartate--tRNA ligase, cytoplasmic OS=Homo sapiens OX=9606 GN=DARS1 PE=1 SV=2	368.445	9.44731	DARS1	sp|P14868|SYDC_HUMAN	394_1	sp|P14868|SYDC_HUMAN	13.5389	NA	57100	EIMDAAEDYAK;ESIVDVEGVVR;FQTEIQTVNK;VFSIGPVFR	1;1;1;1	4	4	0.0818	14875;13149;13351;7573	-	Aspartate--tRNA ligase, cytoplasmic OS=Homo sapiens OX=9606 GN=DARS1 PE=1 SV=2	928.607	23.8104
sp|Q9BUJ2|HNRL1_HUMAN	190_1	sp|Q9BUJ2|HNRL1_HUMAN	2.01138	NA	95679.3	YNILGTNAIMDK	1	1	1	0.014	16331	-	Heterogeneous nuclear ribonucleoprotein U-like protein 1 OS=Homo sapiens OX=9606 GN=HNRNPUL1 PE=1 SV=2	716.973	15.5864	HNRNPUL1
sp|P59998|ARPC4_HUMAN	252_1	sp|P59998|ARPC4_HUMAN	4.07786	NA	19654.3	AENFFILR	1	1	1	0.0476	7341	-	Actin-related protein 2/3 complex subunit 4 OS=Homo sapiens OX=9606 GN=ARPC4 PE=1 SV=3	636.418	48.9552	ARPC4	sp|P59998|ARPC4_HUMAN	504_1	sp|P59998|ARPC4_HUMAN	12.572	NA	19654.3	AENFFILR;ELLLQPVTISR;IVAEEFLK;VLIEGSINSVR	1;1;1;1	4	4	0.2262	7216;15341;5478;12693	-	Actin-related protein 2/3 complex subunit 4 OS=Homo sapiens OX=9606 GN=ARPC4 PE=1 SV=3	1229.48	94.5754
sp|P09493|TPM1_HUMAN	78_1	sp|P09493|TPM1_HUMAN	13.1685	NA	32688.7	ATDAEADVASLNR;IQLVEEELDR;LVIIESDLER;MEIQEIQLK	1;1;1;1	4	5	0.1479	15950;13996;13997;12479;10880	-	Tropomyosin alpha-1 chain OS=Homo sapiens OX=9606 GN=TPM1 PE=1 SV=2	6199.9	269.561	TPM1	sp|P09493|TPM1_HUMAN	149_3	sp|P09493|TPM1_HUMAN	11.8548	NA	32688.7	IQLVEEELDR;LVIIESDLER;MEIQEIQLK;QLEDELVSLQK	0;1;1;1	3	5	0.1408	14475;14474;12691;10967;10970;16310;16311	-	Tropomyosin alpha-1 chain OS=Homo sapiens OX=9606 GN=TPM1 PE=1 SV=2	916.849	39.863
sp|P07339|CATD_HUMAN	18_1	sp|P07339|CATD_HUMAN	9.31983	NA	44523.6	QPGITFIAAK;VGFAEAAR;YYTVFDR	1;1;1	3	3	0.0607	8408;2242;6034	-	Cathepsin D OS=Homo sapiens OX=9606 GN=CTSD PE=1 SV=1	4331.14	206.245	CTSD	sp|P07339|CATD_HUMAN	31_1	sp|P07339|CATD_HUMAN	15.0503	NA	44523.6	FDGILGMAYPR;LSPEDYTLK;QPGITFIAAK;VGFAEAAR;YYTVFDR	1;1;1;1;1	5	5	0.1092	14357;8887;8303;2228;5871	-	Cathepsin D OS=Homo sapiens OX=9606 GN=CTSD PE=1 SV=1	1993.64	94.935
sp|P22392|NDKB_HUMAN	131_1	sp|P22392|NDKB_HUMAN	3.03647	NA	17286.9	TFIAIKPDGVQR	1	1	1	0.0789	16195	sp|P15531|NDKA_HUMAN	Nucleoside diphosphate kinase B OS=Homo sapiens OX=9606 GN=NME2 PE=1 SV=1	286.834	23.9028	NME2
sp|P13639|EF2_HUMAN	175_1	sp|P13639|EF2_HUMAN	47.202	NA	95276.9	EDLYLKPIQR;EGIPALDNFLDK;FSVSPVVR;GEGQLGPAER;GPLMMYISK;IMGPNYTPGK;NPADLPK;QFAEMYVAK;SDPVVSYR;TGTITTFEHAHNMR;VFDAIMNFK;VFSGLVSTGLK;VNFTVDQIR	1;1;1;1;1;1;1;1;1;1;1;1;1	13	14	0.1469	14790;15936;4082;7423;7425;8205;9285;930;9544;4914;19224;9489;10170;9726	-	Elongation factor 2 OS=Homo sapiens OX=9606 GN=EEF2 PE=1 SV=4	18751.2	360.601	EEF2	sp|P13639|EF2_HUMAN	339_1	sp|P13639|EF2_HUMAN	83.2814	NA	95276.9	ARPFPDGLAEDIDK;AYLPVNESFGFTADLR;CELLYEGPPDDEAAMGIK;DLEEDHACIPIK;EDLYLKPIQR;EGIPALDNFLDK;ETVSEESNVLCLSK;FSVSPVVR;GEGQLGPAER;GPLMMYISK;GVQYLNEIK;IMGPNYTPGK;KEDLYLKPIQR;NPADLPK;QFAEMYVAK;SDPVVSYR;STLTDSLVCK;VFDAIMNFK;VFSGLVSTGLK;VNFTVDQIR;YEWDVAEAR;YFDPANGK;YVEPIEDVPCGNIVGLVGVDQFLVK	1;1;1;1;1;1;1;1;1;1;1;1;1;1;1;1;1;1;1;1;1;1;1	23	27	0.289	21566;24636;26095;19580;15518;17131;22379;3945;7297;8099;8832;9234;9233;9236;18779;912;9517;4745;10709;9454;10215;9702;11170;4438;4459;4460;24959	-	Elongation factor 2 OS=Homo sapiens OX=9606 GN=EEF2 PE=1 SV=4	9290.94	178.672
sp|P50454|SERPH_HUMAN	270_1	sp|P50454|SERPH_HUMAN	11.1922	NA	46411.2	AVLSAEQLR;DTQSGSLLFIGR;TGLYNYYDDEK	1;1;1	3	3	0.0766	6680;15182;16798	-	Serpin H1 OS=Homo sapiens OX=9606 GN=SERPINH1 PE=1 SV=2	3270.3	130.812	SERPINH1	sp|P50454|SERPH_HUMAN	546_1	sp|P50454|SERPH_HUMAN	25.4653	NA	46411.2	AVLSAEQLR;DEEVHAGLGELLR;DTQSGSLLFIGR;LQIVEMPLAHK;LYGPSSVSFADDFVR;SALQSINEWAAQTTDGK;TGLYNYYDDEK	1;1;1;1;1;1;1	7	8	0.2105	6546;19549;16069;15645;23246;24786;24787;18300	-	Serpin H1 OS=Homo sapiens OX=9606 GN=SERPINH1 PE=1 SV=2	1743.47	69.7387
sp|Q12906|ILF3_HUMAN	184_1	sp|Q12906|ILF3_HUMAN	2.03652	NA	95279.1	SIGTANRPMGAGEALR	1	1	1	0.0179	19132	-	Interleukin enhancer-binding factor 3 OS=Homo sapiens OX=9606 GN=ILF3 PE=1 SV=3	501.905	12.8694	ILF3	sp|Q12906|ILF3_HUMAN	359_1	sp|Q12906|ILF3_HUMAN	10.0982	NA	95279.1	LFPDTPLALDANK;VLGMDPLPSK;VPTWGPLR	1;1;1	3	4	0.0347	19050;8613;4856;4857	-	Interleukin enhancer-binding factor 3 OS=Homo sapiens OX=9606 GN=ILF3 PE=1 SV=3	1704.86	43.7143
sp|P55209|NP1L1_HUMAN	222_1	sp|P55209|NP1L1_HUMAN	2.39178	NA	45345.9	YAVLYQPLFDK	1	1	1	0.0281	16398	-	Nucleosome assembly protein 1-like 1 OS=Homo sapiens OX=9606 GN=NAP1L1 PE=1 SV=1	969.894	74.6072	NAP1L1	sp|P55209|NP1L1_HUMAN	436_1	sp|P55209|NP1L1_HUMAN	8.85516	NA	45345.9	LDGLVETPTGYIESLPR;YAVLYQPLFDK	1;1	2	2	0.0716	25113;17775	-	Nucleosome assembly protein 1-like 1 OS=Homo sapiens OX=9606 GN=NAP1L1 PE=1 SV=1	281.88	21.683
sp|P27816|MAP4_HUMAN	204_1	sp|P27816|MAP4_HUMAN	4.07786	NA	120930	ALPLEAEVAPVK	1	1	2	0.0104	13844;13843	-	Microtubule-associated protein 4 OS=Homo sapiens OX=9606 GN=MAP4 PE=1 SV=3	776.04	11.7582	MAP4	sp|P27816|MAP4_HUMAN	408_1	sp|P27816|MAP4_HUMAN	6.64687	NA	120930	ALPLEAEVAPVK;NVVLPTETEVAPAK	1;1	2	3	0.0226	14256;14254;20144	-	Microtubule-associated protein 4 OS=Homo sapiens OX=9606 GN=MAP4 PE=1 SV=3	1002.22	15.1852
sp|P11940|PABP1_HUMAN	88_1	sp|P11940|PABP1_HUMAN	18.9324	NA	70625.9	ALDTMNFDVIK;EFSPFGTITSAK;GFGFVSFER;IVATKPLYVALAQR;NLDDGIDDER	1;1;1;1;1	5	5	0.0881	14614;14976;8372;18704;11707	-	Polyadenylate-binding protein 1 OS=Homo sapiens OX=9606 GN=PABPC1 PE=1 SV=2	2743.18	72.1889	PABPC1	sp|P11940|PABP1_HUMAN	211_1	sp|P11940|PABP1_HUMAN	13.9778	NA	70625.9	EFSPFGTITSAK;FSPAGPILSIR;GFGFVSFER;SGVGNIFIK	1;1;1;1	4	5	0.0645	15787;11778;8259;8260;5117	-	Polyadenylate-binding protein 1 OS=Homo sapiens OX=9606 GN=PABPC1 PE=1 SV=2	2039.26	53.6647
sp|P15880|RS2_HUMAN	116_1	sp|P15880|RS2_HUMAN	2.62098	NA	31304.6	GTGIVSAPVPK	1	1	1	0.0375	7790	-	40S ribosomal protein S2 OS=Homo sapiens OX=9606 GN=RPS2 PE=1 SV=2	1357.38	61.6989	RPS2	sp|P15880|RS2_HUMAN	228_1	sp|P15880|RS2_HUMAN	18.237	NA	31304.6	ATFDAISK;GTGIVSAPVPK;LSIVPVR;SLEEIYLFSLPIK;TYSYLTPDLWK	1;1;1;1;1	5	6	0.1706	2999;7669;7666;1446;21711;18445	-	40S ribosomal protein S2 OS=Homo sapiens OX=9606 GN=RPS2 PE=1 SV=2	1688.71	76.7594
sp|P68366|TBA4A_HUMAN	137_1	sp|P68366|TBA4A_HUMAN	3.03647	NA	49892.4	AFVHWYVGEGMEEGEFSEAR;EDMAALEK;EIIDPVLDR;FDLMYAK;IHFPLATYAPVISAEK;LSVDYGK;VGINYQPPTVVPGGDLAK	0;0;1;0;0;0;0	1	1	0.1897	20895;4472;9054;3968;19883;19884;19882;19885;1420;20135	-	Tubulin alpha-4A chain OS=Homo sapiens OX=9606 GN=TUBA4A PE=1 SV=1	1461.67	66.4394	TUBA4A	sp|P68366|TBA4A_HUMAN	258_1	sp|P68366|TBA4A_HUMAN	10.9195	NA	49892.4	AFVHWYVGEGMEEGEFSEAR;AVCMLSNTTAIAEAWAR;AVFVDLEPTVIDEIR;EDMAALEK;EIIDPVLDR;FDGALNVDLTEFQTNLVPYPR;FDLMYAK;IHFPLATYAPVISAEK;LSVDYGK;NLDIERPTYTNLNR;SIQFVDWCPTGFK;VGINYQPPTVVPGGDLAK	0;0;1;0;1;0;0;0;0;0;1;0	3	3	0.3683	27395;27394;27396;25148;23854;4316;4313;8985;27584;3842;24248;24244;24245;24249;24247;24246;1393;1398;1387;1394;23886;22208;24821;24822;24820	-	Tubulin alpha-4A chain OS=Homo sapiens OX=9606 GN=TUBA4A PE=1 SV=1	551.53	25.0695
sp|P14625|ENPL_HUMAN	57_1	sp|P14625|ENPL_HUMAN	22.3844	NA	92411.3	DISTNYYASQK;EAESSPFVER;EEEAIQLDGLNASQIR;ELISNASDALDK;IYFMAGSSR;SGYLLPDTK;TETVEEPMEEEEAAK	1;1;1;0;1;1;1	6	6	0.1021	15081;11382;20003;14800;7956;6887;19765	-	Endoplasmin OS=Homo sapiens OX=9606 GN=HSP90B1 PE=1 SV=1	7618.69	155.483	HSP90B1	sp|P14625|ENPL_HUMAN	74_2	sp|P14625|ENPL_HUMAN	64.3754	NA	92411.3	DISTNYYASQK;EAESSPFVER;EEASDYLELDTIK;EEEAIQLDGLNASQIR;EFEPLLNWMK;EFGTNIK;ELISNASDALDK;FAFQAEVNR;FQSSHHPTDITSLDQYVER;GLFDEYGSK;GVVDSDDLPLNVSR;IYFMAGSSR;SGTSEFLNK;SGYLLPDTK;VFITDDFHDMMPK;YLNFVK;YNDTFWK	1;1;1;1;1;1;0;1;1;1;1;1;1;1;1;1;1	16	24	0.2279	15911;15909;11520;11519;21211;21210;24518;16459;1948;15535;15534;9360;27213;27214;7361;7362;20495;20494;7856;6414;6415;6775;6776;22393;1438;6132	-	Endoplasmin OS=Homo sapiens OX=9606 GN=HSP90B1 PE=1 SV=1	5995.7	122.361
sp|P62750|RL23A_HUMAN	27_1	sp|P62750|RL23A_HUMAN	4.07786	NA	17684.1	LAPDYDALDVANK	1	1	1	0.0833	17152	-	60S ribosomal protein L23a OS=Homo sapiens OX=9606 GN=RPL23A PE=1 SV=1	1058.12	117.568	RPL23A
sp|P07900|HS90A_HUMAN	57_3	sp|P07900|HS90A_HUMAN	27.232	NA	84606.7	ADLINNLGTIAK;APFDLFENR;DQVANSAFVER;EDQTEYLEER;ELISNSSDALDK;HIYYITGETK;HLEINPDHSIIETLR;NPDDITNEEYGEFYK;SLTNDWEDHLAVK;TLTIVDTGIGMTK;TLVSVTK;YESLTDPSK;YIDQEELNK	0;1;1;0;1;1;1;1;0;1;1;0;0	8	14	0.1981	13982;13981;10187;10186;13802;15522;15523;15134;15133;13541;20019;20157;20156;18559;18560;16281;16280;16574;16279;819;8189;8190;11414	-	Heat shock protein HSP 90-alpha OS=Homo sapiens OX=9606 GN=HSP90AA1 PE=1 SV=5	20382.1	522.619	HSP90AA1	sp|P07900|HS90A_HUMAN	74_3	sp|P07900|HS90A_HUMAN	53.3393	NA	84606.7	ADLINNLGTIAK;APFDLFENR;CLELFTELAEDK;DQVANSAFVER;EDQTEYLEER;EGLELPEDEEEK;ELHINLIPNK;ELHINLIPNKQDR;ELISNSSDALDK;FYEQFSK;HIYYITGETK;HLEINPDHSIIETLR;HNDDEQYAWESSAGGSFTVR;LGLGIDEDDPTADDTSAAVTEEMPPLEGDDDTSR;NPDDITNEEYGEFYK;SLTNDWEDHLAVK;TLTIVDTGIGMTK;VILHLK;YESLTDPSK;YIDQEELNK;YYTSASGDEMVSLK	0;1;1;1;0;0;1;1;1;1;1;1;0;1;1;0;1;0;0;0;1	13	25	0.3497	14450;14451;14449;14495;10220;10222;20134;14203;14204;16569;16570;16568;16590;19084;12826;22320;15993;15991;15992;5458;5459;13888;13889;13890;24532;27198;28417;24894;24893;24895;21261;21258;21259;17612;17609;17611;17993;406;403;8080;8081;8084;8079;8076;11555;11554;11557;11558;11556;11559;11562;11560;11567;11552;11566;11564;11550;21674	-	Heat shock protein HSP 90-alpha OS=Homo sapiens OX=9606 GN=HSP90AA1 PE=1 SV=5	7199.36	184.599
sp|P08238|HS90B_HUMAN	57_2	sp|P08238|HS90B_HUMAN	25.4021	NA	83212.1	ADLINNLGTIAK;ALLFIPR;APFDLFENK;DNSTMGYMMAK;EDQTEYLEER;ELISNASDALDK;EQVANSAFVER;HLEINPDHPIVETLR;IDIIPNPQER;SLTNDWEDHLAVK;SLVSVTK;YESLTDPSK;YIDQEELNK	0;1;1;1;0;0;1;1;1;0;1;0;0	7	10	0.1865	13982;13981;2446;9374;14116;15522;15523;14800;14146;14142;19988;12697;12698;12699;18559;18560;568;8189;8190;11414	-	Heat shock protein HSP 90-beta OS=Homo sapiens OX=9606 GN=HSP90AB1 PE=1 SV=4	27154.1	678.853	HSP90AB1	sp|P08238|HS90B_HUMAN	74_4	sp|P08238|HS90B_HUMAN	53.2473	NA	83212.1	ADLINNLGTIAK;ALLFIPR;APFDLFENK;CLELFSELAEDK;CLELFSELAEDKENYK;DNSTMGYMMAK;EDQTEYLEER;EGLELPEDEEEK;ELISNASDALDK;EQVANSAFVER;FYEAFSK;HLEINPDHPIVETLR;HNDDEQYAWESSAGGSFTVR;IDIIPNPQER;LGLGIDEDEVAAEEPNAAVPDEIPPLEGDEDASR;NPDDITQEEYGEFYK;SIYYITGESK;SLTNDWEDHLAVK;SLVSVTK;VILHLK;YESLTDPSK;YHTSQSGDEMTSLSEYVSR;YIDQEELNK	0;1;1;1;1;1;0;0;0;1;1;1;0;1;1;1;1;0;1;0;0;1;0	14	33	0.3785	14450;14451;14449;14495;2429;2430;9338;9339;19869;25968;14644;16569;16570;16568;16590;19084;15535;15534;14697;14695;14696;3949;24483;24485;24482;24484;27198;12957;12956;12955;28415;27458;25015;25016;25017;11863;21261;21258;21259;577;571;573;570;572;578;576;406;403;8080;8081;8084;8079;8076;26908;26907;11555;11554;11557;11558;11556;11559;11562;11560;11567;11552;11566;11564;11550	-	Heat shock protein HSP 90-beta OS=Homo sapiens OX=9606 GN=HSP90AB1 PE=1 SV=4	7240.27	181.007
sp|P61978|HNRPK_HUMAN	115_1	sp|P61978|HNRPK_HUMAN	25.0054	NA	50944.4	DYDDMSPR;IDEPLEGSEDR;IILDLISESPIK;NLPLPPPPPPR;NTDEMVELR;RPAEDMEEEQAFK;TDYNASVSVPDSSGPER	1;1;1;1;1;1;1	7	7	0.1749	6995;14414;16118;12705;10105;18980;19980	-	Heterogeneous nuclear ribonucleoprotein K OS=Homo sapiens OX=9606 GN=HNRNPK PE=1 SV=1	6538.31	242.16	HNRNPK	sp|P61978|HNRPK_HUMAN	227_1	sp|P61978|HNRPK_HUMAN	32.8031	NA	50944.4	DLAGSIIGK;DYDDMSPR;GSDFDCELR;IDEPLEGSEDR;IILDLISESPIK;NLPLPPPPPPR;NTDEMVELR;RPAEDMEEEQAFK;TDYNASVSVPDSSGPER	1;1;1;1;1;1;1;1;1	9	10	0.2138	3528;6869;9891;14999;17371;12962;10142;22140;22141;24454	-	Heterogeneous nuclear ribonucleoprotein K OS=Homo sapiens OX=9606 GN=HNRNPK PE=1 SV=1	5753.29	213.085
sp|P12429|ANXA3_HUMAN	81_1	sp|P12429|ANXA3_HUMAN	3.03647	NA	36352.7	LTFDEYR	1	1	1	0.0217	5432	-	Annexin A3 OS=Homo sapiens OX=9606 GN=ANXA3 PE=1 SV=3	1406.7	58.6127	ANXA3	sp|P12429|ANXA3_HUMAN	154_1	sp|P12429|ANXA3_HUMAN	14.4825	NA	36352.7	ALLTLADGR;LTFDEYR;MLISILTER;SLGDDISSETSGDFR	1;1;1;1	4	4	0.1238	4976;5299;9196;22222	-	Annexin A3 OS=Homo sapiens OX=9606 GN=ANXA3 PE=1 SV=3	1116.5	46.5207
sp|P04264|K2C1_HUMAN	2_10	sp|P04264|K2C1_HUMAN	91.8605	NA	65999	AEAESLYQSK;AQYEDIAQK;DVDGAYMTK;DYQELMNTK;FLEQQNQVLQTK;FSSCGGGGGSFGAGGGFGSR;GGGGGGYGSGGSSYGSGGGSYGSGGGGGGGR;GSGGGSSGGSIGGR;GSYGSGGSSYGSGGGSYGSGGGGGGHGSYGSGSSSGGYR;IEISELNR;LNDLEDALQQAK;NKLNDLEDALQQAK;NMQDMVEDYR;QISNLQQSISDAEQR;SEIDNVK;SGGGFSSGSAGIINYQR;SISISVAR;SKAEAESLYQSK;SLDLDSIIAEVK;SLNNQFASFIDK;SLNNQFASFIDKVR;SLVNLGGSK;TLLEGEESR;TNAENEFVTIK;TNAENEFVTIKK;WELLQQVDTSTR;YEDEINK	1;1;1;1;0;1;1;1;1;0;1;1;1;1;1;1;1;1;1;1;1;1;1;1;1;1;0	24	72	0.4798	10686;10685;10687;8939;8938;7025;7022;7026;7024;11111;11584;11583;18065;18067;18064;18063;18066;19920;20915;20916;9730;21158;21157;6301;16415;16420;19125;15310;15616;15309;15942;15943;15614;15615;15945;15618;15311;15333;19679;19678;19752;19748;1880;19489;19497;19488;2538;2537;2534;16097;16101;16095;15371;15370;16864;16865;16863;16888;16885;16867;19374;3668;3669;8018;14578;14579;14581;14604;14608;…	-	Keratin, type II cytoskeletal 1 OS=Homo sapiens OX=9606 GN=KRT1 PE=1 SV=6	229793	6565.51	KRT1	sp|P04264|K2C1_HUMAN	8_8	sp|P04264|K2C1_HUMAN	113.58	NA	65999	AEAESLYQSK;AQYEDIAQK;DVDGAYMTK;DYQELMNTK;FLEQQNQVLQTK;FSSCGGGGGSFGAGGGFGSR;GGGGGGYGSGGSSYGSGGGSYGSGGGGGGGR;GSGGGSSGGSIGGR;GSYGSGGSSYGSGGGSYGSGGGGGGHGSYGSGSSSGGYR;IEISELNR;LNDLEDALQQAK;LNDLEDALQQAKEDLAR;MSGECAPNVSVSVSTSHTTISGGGSR;NKLNDLEDALQQAK;NKYEDEINK;NMQDMVEDYR;QISNLQQSISDAEQR;SEIDNVK;SGGGFSSGSAGIINYQR;SISISVAR;SKAEAESLYQSK;SLDLDSIIAEVK;SLNNQFASFIDK;SLVNLGGSK;THNLEPYFESFINNLR;TLLEGEESR;TNAENEF…	1;1;1;1;0;1;1;1;1;0;1;1;1;1;0;1;1;1;1;1;1;1;1;1;1;1;1;1;1;1	27	126	0.5683	10761;10766;10767;10759;10757;10756;10762;10758;10768;10769;8868;8869;8862;8863;8870;8859;8860;8861;6899;6897;6898;6893;6895;6896;6894;6900;11246;11248;11740;11739;11247;11734;20330;20329;20331;20355;24312;24311;24313;24314;24315;27527;27526;22298;9711;9709;9712;9710;28364;6146;17793;17795;17794;17815;17817;17790;25687;23907;22461;11594;16254;16255;16700;16704;16702;17141;16703;16256;16701;17142;…	-	Keratin, type II cytoskeletal 1 OS=Homo sapiens OX=9606 GN=KRT1 PE=1 SV=6	139307	3980.2
sp|P84103|SRSF3_HUMAN	208_1	sp|P84103|SRSF3_HUMAN	2.39178	NA	19317.9	VYVGNLGNNGNK	1	1	1	0.0732	14141	-	Serine/arginine-rich splicing factor 3 OS=Homo sapiens OX=9606 GN=SRSF3 PE=1 SV=1	1161.94	116.194	SRSF3
sp|P35637|FUS_HUMAN	60_1	sp|P35637|FUS_HUMAN	2.03652	NA	53393.8	AAIDWFDGK	1	1	1	0.0171	7698	sp|Q92804|RBP56_HUMAN	RNA-binding protein FUS OS=Homo sapiens OX=9606 GN=FUS PE=1 SV=1	528.996	31.1174	FUS	sp|P35637|FUS_HUMAN	102_1	sp|P35637|FUS_HUMAN	2.9996	NA	53393.8	GEATVSFDDPPSAK	1	1	1	0.0266	19169	sp|Q92804|RBP56_HUMAN	RNA-binding protein FUS OS=Homo sapiens OX=9606 GN=FUS PE=1 SV=1	312.887	18.4051
sp|P62241|RS8_HUMAN	275_1	sp|P62241|RS8_HUMAN	5.54849	NA	24190.2	ADGYVLEGK;LTPEEEEILNK	1;1	2	2	0.0962	5703;15569	-	40S ribosomal protein S8 OS=Homo sapiens OX=9606 GN=RPS8 PE=1 SV=2	3391.04	339.104	RPS8	sp|P62241|RS8_HUMAN	555_1	sp|P62241|RS8_HUMAN	18.6028	NA	24190.2	ADGYVLEGK;ELEFYLR;IIDVVYNASNNELVR;ISSLLEEQFQQGK;LTPEEEEILNK	1;1;1;1;1	5	7	0.2644	5559;6022;23887;23888;20891;16646;16647	-	40S ribosomal protein S8 OS=Homo sapiens OX=9606 GN=RPS8 PE=1 SV=2	3445.83	344.583
sp|P06733|ENOA_HUMAN	113_1	sp|P06733|ENOA_HUMAN	22.6711	NA	47139.3	IGAEVYHNLK;LAQANGWGVMVSHR;LMIEMDGTENK;TIAPALVSK;YDLDFK;YISPDQLADLYK	1;1;1;1;1;1	6	7	0.1429	11180;18545;14900;4319;1780;17481;17480	-	Alpha-enolase OS=Homo sapiens OX=9606 GN=ENO1 PE=1 SV=2	16994.7	586.025	ENO1	sp|P06733|ENOA_HUMAN	223_2	sp|P06733|ENOA_HUMAN	34.6063	NA	47139.3	AAVPSGASTGIYEALELR;DATNVGDEGGFAPNILENK;GNPTVEVDLFTSK;IGAEVYHNLK;LMIEMDGTENK;SGETEDTFIADLVVGLCTGQIK;SGKYDLDFK;TIAPALVSK;VVIGMDVAASEFFR;YISPDQLADLYK;YNQLLR	0;1;1;1;1;0;1;1;1;1;1	9	14	0.3295	24681;24680;25809;18871;18873;11316;11317;15685;15684;16141;27453;9063;4152;4153;21515;19299;1922	-	Alpha-enolase OS=Homo sapiens OX=9606 GN=ENO1 PE=1 SV=2	6832	235.586
sp|Q13283|G3BP1_HUMAN	55_1	sp|Q13283|G3BP1_HUMAN	2.43749	NA	52132.1	TFSWASVTSK	1	1	1	0.0215	10321	-	Ras GTPase-activating protein-binding protein 1 OS=Homo sapiens OX=9606 GN=G3BP1 PE=1 SV=1	1048.2	43.6751	G3BP1
sp|P62847|RS24_HUMAN	25_1	sp|P62847|RS24_HUMAN	4.07786	NA	15413.4	QMVIDVLHPGK	1	1	1	0.0827	13839	-	40S ribosomal protein S24 OS=Homo sapiens OX=9606 GN=RPS24 PE=1 SV=1	783.756	111.965	RPS24
sp|P41250|GARS_HUMAN	271_1	sp|P41250|GARS_HUMAN	7.11433	NA	83112.6	LPFAAAQIGNSFR;TVNVVQFEPSK	1;1	2	2	0.0325	17000;14103	-	Glycine--tRNA ligase OS=Homo sapiens OX=9606 GN=GARS1 PE=1 SV=3	1741.42	34.1454	GARS1	sp|P41250|GARS_HUMAN	549_1	sp|P41250|GARS_HUMAN	16.402	NA	83112.6	FADFMVK;GEFTIETEGK;LLEFNQGK;NNIIQTWR;TLYVEEVVPNVIEPSFGLGR;TVNVVQFEPSK	1;1;1;1;1;1	6	7	0.0866	3106;10289;5473;8244;27067;14638;14639	-	Glycine--tRNA ligase OS=Homo sapiens OX=9606 GN=GARS1 PE=1 SV=3	1916.45	37.5774
sp|P07237|PDIA1_HUMAN	66_1	sp|P07237|PDIA1_HUMAN	11.3735	NA	57080.7	DGVVLFK;EADDIVNWLK;ENLLDFIK;ILEFFGLK	1;1;1;1	4	4	0.065	1350;12937;6829;6137	-	Protein disulfide-isomerase OS=Homo sapiens OX=9606 GN=P4HB PE=1 SV=3	5302.21	135.954	P4HB	sp|P07237|PDIA1_HUMAN	121_1	sp|P07237|PDIA1_HUMAN	46.0441	NA	57080.7	DGVVLFK;EADDIVNWLK;ENLLDFIK;HNQLPLVIEFTEQTAPK;ILEFFGLK;ILFIFIDSDHTDNQR;LITLEEEMTK;QLAPIWDK;TGPAATTLPDGAAAESLVESSEVAVIGFFK;TVIDYNGER;VDATEESDLAQQYGVR;VHSFPTLK	1;1;1;1;1;1;1;1;1;1;1;1	12	16	0.2874	1329;1330;13175;6711;25854;5971;24901;13317;13316;6049;28234;8900;24456;24455;24460;4928	-	Protein disulfide-isomerase OS=Homo sapiens OX=9606 GN=P4HB PE=1 SV=3	3270.08	83.8483
sp|Q13148|TADBP_HUMAN	178_1	sp|Q13148|TADBP_HUMAN	4.07786	NA	44711.3	FTEYETQVK	1	1	1	0.0217	11204	-	TAR DNA-binding protein 43 OS=Homo sapiens OX=9606 GN=TARDBP PE=1 SV=1	511.936	30.1139	TARDBP
sp|P12004|PCNA_HUMAN	240_1	sp|P12004|PCNA_HUMAN	2.43749	NA	28750.3	YLNFFTK	1	1	1	0.0268	5173	-	Proliferating cell nuclear antigen OS=Homo sapiens OX=9606 GN=PCNA PE=1 SV=1	740.18	41.1211	PCNA	sp|P12004|PCNA_HUMAN	473_1	sp|P12004|PCNA_HUMAN	13.5238	NA	28750.3	AEDNADTLALVFEAPNQEK;CAGNEDIITLR;FSASGELGNGNIK;SEGFDTYR;YLNFFTK	1;1;1;1;1	5	5	0.2222	26432;15068;16090;6168;5042	-	Proliferating cell nuclear antigen OS=Homo sapiens OX=9606 GN=PCNA PE=1 SV=1	962.414	53.4675
sp|P05388|RLA0_HUMAN	83_1	sp|P05388|RLA0_HUMAN	8.15573	NA	34251.8	IIQLLDDYPK;TSFFQALGITTK	1;1	2	2	0.0694	13396;15562	sp|Q8NHW5|RLA0L_HUMAN	60S acidic ribosomal protein P0 OS=Homo sapiens OX=9606 GN=RPLP0 PE=1 SV=1	1727.62	95.9789	RPLP0	sp|P05388|RLA0_HUMAN	162_1	sp|P05388|RLA0_HUMAN	17.8243	NA	34251.8	EDLTEIR;GNVGFVFTK;GTIEILSDVQLIK;IIQLLDDYPK;SNYFLK	1;1;1;1;1	5	5	0.142	3576;6003;19373;13695;1190	-	60S acidic ribosomal protein P0 OS=Homo sapiens OX=9606 GN=RPLP0 PE=1 SV=1	2127.38	118.188
sp|P14618|KPYM_HUMAN	201_1	sp|P14618|KPYM_HUMAN	21.5401	NA	57900	GADFLVTEVENGGSLGSK;GDYPLEAVR;GSGTAEVELK;GVNLPGAAVDLPAVSEK;ITLDNAYMEK;VFLAQK	1;1;1;1;1;1	6	8	0.1318	19977;19984;7624;6796;19366;19367;12758;126	-	Pyruvate kinase PKM OS=Homo sapiens OX=9606 GN=PKM PE=1 SV=4	22302.5	619.515	PKM	sp|P14618|KPYM_HUMAN	400_1	sp|P14618|KPYM_HUMAN	96.3629	NA	57900	AEGSDVANAVLDGADCIMLSGETAK;APIIAVTR;CCSGAIIVLTK;CDENILWLDYK;DPVQEAWAEDVDLR;EAEAAIYHLQLFEELR;EAEAAIYHLQLFEELRR;FDEILEASDGIMVAR;GADFLVTEVENGGSLGSK;GDLGIEIPAEK;GDYPLEAVR;GIFPVLCKDPVQEAWAEDVDLR;GSGTAEVELK;GVNLPGAAVDLPAVSEK;ITLDNAYMEK;IYVDDGLISLQVK;KGVNLPGAAVDLPAVSEK;LAPITSDPTEATAVGAVEASFK;LDIDSPPITAR;MQHLIAR;NTGIICTIGPASR;RFDEILEASDGIMVAR;TATESFASDPILYRPVAVALDTK;VNFAMNVGK	1;1;1;1;1;1;1;1;1;1;1;1;1;1;1;1;1;1;1;1;1;1;1;1	24	42	0.5348	27729;2694;13807;20152;23031;23032;23033;25628;26503;26502;23304;24442;24459;24441;24462;24458;11268;11269;7496;7495;7494;27833;6672;22969;22970;22968;13009;13511;20062;20060;24310;26898;13026;13028;13027;3391;17848;17847;24803;27665;6317;6316	-	Pyruvate kinase PKM OS=Homo sapiens OX=9606 GN=PKM PE=1 SV=4	13329.5	370.265
sp|P35222|CTNB1_HUMAN	125_1	sp|P35222|CTNB1_HUMAN	3.03647	NA	85442.2	EGLLAIFK	1	1	1	0.0102	4085	sp|P14923|PLAK_HUMAN	Catenin beta-1 OS=Homo sapiens OX=9606 GN=CTNNB1 PE=1 SV=1	205.541	4.89382	CTNNB1
sp|Q07955|SRSF1_HUMAN	40_1	sp|Q07955|SRSF1_HUMAN	2.51202	NA	27727.8	DGTGVVEFVR	1	1	1	0.0403	9318	-	Serine/arginine-rich splicing factor 1 OS=Homo sapiens OX=9606 GN=SRSF1 PE=1 SV=2	1193.72	79.5817	SRSF1	sp|Q07955|SRSF1_HUMAN	72_1	sp|Q07955|SRSF1_HUMAN	7.1053	NA	27727.8	DIEDVFYK;GGPPFAFVEFEDPR	1;1	2	2	0.0887	7741;21899	-	Serine/arginine-rich splicing factor 1 OS=Homo sapiens OX=9606 GN=SRSF1 PE=1 SV=2	322.14	21.476
sp|P15121|ALDR_HUMAN	23_1	sp|P15121|ALDR_HUMAN	11.1922	NA	35830.5	EELFIVSK;MPILGLGTWK;TTAQVLIR	1;1;1	3	3	0.0823	6071;10398;4380	-	Aldo-keto reductase family 1 member B1 OS=Homo sapiens OX=9606 GN=AKR1B1 PE=1 SV=3	3135.84	156.792	AKR1B1	sp|P15121|ALDR_HUMAN	43_1	sp|P15121|ALDR_HUMAN	13.4956	NA	35830.5	EELFIVSK;REELFIVSK;TTAQVLIR;VAIDVGYR	1;1;1;1	4	4	0.0791	5916;10620;4213;3989	-	Aldo-keto reductase family 1 member B1 OS=Homo sapiens OX=9606 GN=AKR1B1 PE=1 SV=3	2114.77	105.739
sp|P51991|ROA3_HUMAN	254_1	sp|P51991|ROA3_HUMAN	3.03647	NA	39570.6	EDTEEYNLR	1	1	1	0.0238	11894	-	Heterogeneous nuclear ribonucleoprotein A3 OS=Homo sapiens OX=9606 GN=HNRNPA3 PE=1 SV=2	319.599	15.98	HNRNPA3
sp|P02768|ALBU_HUMAN	48_1	sp|P02768|ALBU_HUMAN	31.5815	NA	69321.5	AEFAEVSK;DDNPNLPR;FQNALLVR;KVPQVSTPTLVEVSR;LVAASQAALGL;QTALVELVK;TYETTLEK;VPQVSTPTLVEVSR	1;1;1;1;1;1;1;1	8	14	0.11	3791;3793;5364;5365;5952;5954;19383;19382;7457;7078;7077;6611;18412;18411	-	Serum albumin OS=Homo sapiens OX=9606 GN=ALB PE=1 SV=2	14746.2	351.1	ALB	sp|P02768|ALBU_HUMAN	83_1	sp|P02768|ALBU_HUMAN	47.8263	NA	69321.5	AEFAEVSKLVTDLTK;ALVLIAFAQYLQQCPFEDHVK;DVFLGMFLYEYAR;FQNALLVR;KVPQVSTPTLVEVSR;LVAASQAALGL;LVNEVTEFAK;LVTDLTK;QTALVELVK;RHPDYSVVLLLR;VFDEFKPLVEEPQNLIK;VPQVSTPTLVEVSR	1;1;1;1;1;1;1;1;1;1;1;1	12	24	0.2151	23142;27721;22787;22992;5806;5805;5807;23001;23002;23000;22999;7330;11502;1575;1572;1574;6953;20146;20147;20148;20145;26301;20979;20978	-	Serum albumin OS=Homo sapiens OX=9606 GN=ALB PE=1 SV=2	8979.51	213.798
sp|Q9P2N6|KANL3_HUMAN	85_1	sp|Q9P2N6|KANL3_HUMAN	3.03647	NA	95932	TEAVLTHK	1	1	1	0.0088	4273	-	KAT8 regulatory NSL complex subunit 3 OS=Homo sapiens OX=9606 GN=KANSL3 PE=1 SV=2	2.53216	0.0588875	KANSL3
sp|Q6IBS0|TWF2_HUMAN	108_1	sp|Q6IBS0|TWF2_HUMAN	3.03647	NA	39523.3	HQTLQGLAFPLQPEAQR	1	1	1	0.0487	15093	-	Twinfilin-2 OS=Homo sapiens OX=9606 GN=TWF2 PE=1 SV=2	474.389	20.6256	TWF2	sp|Q6IBS0|TWF2_HUMAN	209_1	sp|Q6IBS0|TWF2_HUMAN	4.42758	NA	39523.3	ETIELVHTEPTDVAQLPSR	1	1	1	0.0544	26728	-	Twinfilin-2 OS=Homo sapiens OX=9606 GN=TWF2 PE=1 SV=2	355.804	15.4698
sp|P62851|RS25_HUMAN	268_1	sp|P62851|RS25_HUMAN	7.11433	NA	13733.7	LITPAVVSER;LNNLVLFDK	1;1	2	2	0.152	9498;9246	-	40S ribosomal protein S25 OS=Homo sapiens OX=9606 GN=RPS25 PE=1 SV=1	996.448	166.075	RPS25
sp|Q15365|PCBP1_HUMAN	119_1	sp|Q15365|PCBP1_HUMAN	3.03647	NA	37473.9	IITLTGPTNAIFK	1	1	1	0.0365	16950	-	Poly(rC)-binding protein 1 OS=Homo sapiens OX=9606 GN=PCBP1 PE=1 SV=2	618.772	30.9386	PCBP1	sp|Q15365|PCBP1_HUMAN	233_1	sp|Q15365|PCBP1_HUMAN	2.55024	NA	37473.9	AFAMIIDK;EVGSIIGK;IITLTGPTNAIFK	0;0;1	1	1	0.0815	4395;1838;18506	-	Poly(rC)-binding protein 1 OS=Homo sapiens OX=9606 GN=PCBP1 PE=1 SV=2	287.35	14.3675
sp|P54578|UBP14_HUMAN	87_1	sp|P54578|UBP14_HUMAN	4.07786	NA	56033	VSIVTPEDILR	1	1	1	0.0223	13961	-	Ubiquitin carboxyl-terminal hydrolase 14 OS=Homo sapiens OX=9606 GN=USP14 PE=1 SV=3	751.377	25.0459	USP14
sp|P23526|SAHH_HUMAN	123_1	sp|P23526|SAHH_HUMAN	6.51535	NA	47685.2	VADIGLAAWGR;VPAINVNDSVTK	1;1	2	2	0.0532	10781;14340	-	Adenosylhomocysteinase OS=Homo sapiens OX=9606 GN=AHCY PE=1 SV=4	2762.23	120.097	AHCY	sp|P23526|SAHH_HUMAN	240_1	sp|P23526|SAHH_HUMAN	24.8043	NA	47685.2	AGIPVYAWK;ALDIAENEMPGLMR;DGPLNMILDDGGDLTNLIHTK;GISEETTTGVHNLYK;IILLAEGR;VAVVAGYGDVGK;YPQLLPGIR	1;1;1;1;1;1;1	7	8	0.2037	7066;21827;27189;23113;3793;11053;8622;8621	-	Adenosylhomocysteinase OS=Homo sapiens OX=9606 GN=AHCY PE=1 SV=4	1608.65	69.9414
sp|Q5T750|XP32_HUMAN	72_1	sp|Q5T750|XP32_HUMAN	4.07786	NA	26219.3	TFGVSPLR	1	1	1	0.032	3717	-	Skin-specific protein 32 OS=Homo sapiens OX=9606 GN=XP32 PE=1 SV=1	1073.14	89.4284	XP32	sp|Q5T750|XP32_HUMAN	136_1	sp|Q5T750|XP32_HUMAN	4.42758	NA	26219.3	TFGVSPLR	1	1	1	0.032	3609	-	Skin-specific protein 32 OS=Homo sapiens OX=9606 GN=XP32 PE=1 SV=1	208.765	17.3971
sp|P63244|RACK1_HUMAN	155_1	sp|P63244|RACK1_HUMAN	9.31983	NA	35054.6	DETNYGIPQR;DGQAMLWDLNEGK;LWDLTTGTTTR	1;1;1	3	3	0.1073	12637;18075;14561	-	Receptor of activated protein C kinase 1 OS=Homo sapiens OX=9606 GN=RACK1 PE=1 SV=3	3244.31	147.468	RACK1	sp|P63244|RACK1_HUMAN	294_1	sp|P63244|RACK1_HUMAN	17.8836	NA	35054.6	DETNYGIPQR;DGQAMLWDLNEGK;DVLSVAFSSDNR;IIVDELKQEVISTSSK;LWDLTTGTTTR	1;1;1;1;1	5	6	0.1956	12860;12859;20340;16534;24547;15187	-	Receptor of activated protein C kinase 1 OS=Homo sapiens OX=9606 GN=RACK1 PE=1 SV=3	2134.23	97.0102
sp|Q12792|TWF1_HUMAN	166_1	sp|Q12792|TWF1_HUMAN	2.28179	NA	40257.7	HQTLQGVAFPISR	1	1	1	0.0371	17814	-	Twinfilin-1 OS=Homo sapiens OX=9606 GN=TWF1 PE=1 SV=3	349.482	15.1949	TWF1
																RAD23B	sp|P54727|RD23B_HUMAN	327_1	sp|P54727|RD23B_HUMAN	2.55024	NA	43144.6	AVEYLLMGIPGDR	1	1	1	0.0318	19462	-	UV excision repair protein RAD23 homolog B OS=Homo sapiens OX=9606 GN=RAD23B PE=1 SV=1	107.146	7.14307
																TPP2	sp|P29144|TPP2_HUMAN	332_1	sp|P29144|TPP2_HUMAN	2.14949	NA	138263	FDVQSSLK	1	1	1	0.0064	4798	-	Tripeptidyl-peptidase 2 OS=Homo sapiens OX=9606 GN=TPP2 PE=1 SV=4	294.787	4.21124
																NARS1	sp|O43776|SYNC_HUMAN	381_1	sp|O43776|SYNC_HUMAN	2.55024	NA	62902.5	NLMFLVLR	1	1	1	0.0146	7104	-	Asparagine--tRNA ligase, cytoplasmic OS=Homo sapiens OX=9606 GN=NARS1 PE=1 SV=1	59.9922	2.0687
																SCFD1	sp|Q8WVM8|SCFD1_HUMAN	329_1	sp|Q8WVM8|SCFD1_HUMAN	2.67772	NA	72334	SLLDIISDPDAGTPEDK	1	1	1	0.0265	24517	-	Sec1 family domain-containing protein 1 OS=Homo sapiens OX=9606 GN=SCFD1 PE=1 SV=4	101.821	2.82835
																DDX3X	sp|O00571|DDX3X_HUMAN	347_1	sp|O00571|DDX3X_HUMAN	6.97782	NA	73198	DLLDLLVEAK;SFLLDLLNATGK	1;1	2	2	0.0332	10873;16009	-	ATP-dependent RNA helicase DDX3X OS=Homo sapiens OX=9606 GN=DDX3X PE=1 SV=3	32.2822	0.807056
																APEH	sp|P13798|ACPH_HUMAN	330_1	sp|P13798|ACPH_HUMAN	2.9996	NA	81172.6	SALYYVDLIGGK	1	1	1	0.0164	16214	-	Acylamino-acid-releasing enzyme OS=Homo sapiens OX=9606 GN=APEH PE=1 SV=4	149.669	4.53542
																DIAPH1	sp|O60610|DIAP1_HUMAN	345_1	sp|O60610|DIAP1_HUMAN	2.49097	NA	141258	ELGEYFLFDPK	1	1	1	0.0086	17786	-	Protein diaphanous homolog 1 OS=Homo sapiens OX=9606 GN=DIAPH1 PE=1 SV=2	92.3138	1.31877
																NIBAN1	sp|Q9BZQ8|NIBA1_HUMAN	117_1	sp|Q9BZQ8|NIBA1_HUMAN	4.42758	NA	103070	VLTSEDEYNLLSDR	1	1	1	0.0151	23174	-	Protein Niban 1 OS=Homo sapiens OX=9606 GN=NIBAN1 PE=1 SV=1	106.519	2.59802
																RPLP2	sp|P05387|RLA2_HUMAN	568_1	sp|P05387|RLA2_HUMAN	8.85516	NA	11657.8	ILDSVGIEADDDR;NIEDVIAQGIGK	1;1	2	2	0.2174	19102;14926	-	60S acidic ribosomal protein P2 OS=Homo sapiens OX=9606 GN=RPLP2 PE=1 SV=1	165.537	33.1075
																AK1	sp|P00568|KAD1_HUMAN	452_1	sp|P00568|KAD1_HUMAN	2.9996	NA	21621.3	IIFVVGGPGSGK	1	1	1	0.0619	10934	-	Adenylate kinase isoenzyme 1 OS=Homo sapiens OX=9606 GN=AK1 PE=1 SV=3	556.884	37.1256
																PSMC2	sp|P35998|PRS7_HUMAN	343_1	sp|P35998|PRS7_HUMAN	2.9996	NA	48603.1	ALDEGDIALLK	1	1	1	0.0254	11773	-	26S proteasome regulatory subunit 7 OS=Homo sapiens OX=9606 GN=PSMC2 PE=1 SV=3	257.896	8.31924
																SNX12	sp|Q9UMY4|SNX12_HUMAN	50_1	sp|Q9UMY4|SNX12_HUMAN	2.55024	NA	18872.7	TNLPIFK	1	1	1	0.0432	2518	sp|O60493|SNX3_HUMAN	Sorting nexin-12 OS=Homo sapiens OX=9606 GN=SNX12 PE=1 SV=4	674.022	67.4022
																NEDD4L	sp|Q96PU5|NED4L_HUMAN	207_1	sp|Q96PU5|NED4L_HUMAN	4.42758	NA	111862	LLFEVFDENR	1	1	1	0.0103	15722	-	E3 ubiquitin-protein ligase NEDD4-like OS=Homo sapiens OX=9606 GN=NEDD4L PE=1 SV=2	47.0276	0.904377
																KPNA6	sp|O60684|IMA7_HUMAN	26_1	sp|O60684|IMA7_HUMAN	2.62779	NA	59991.5	EPSPPIDEVINTPR	1	1	1	0.0261	21885	-	Importin subunit alpha-7 OS=Homo sapiens OX=9606 GN=KPNA6 PE=1 SV=1	198.6	8.27501
																HEXB	sp|P07686|HEXB_HUMAN	560_1	sp|P07686|HEXB_HUMAN	2.38155	NA	63071.2	LAPGTIVEVWK	1	1	1	0.0198	13507	-	Beta-hexosaminidase subunit beta OS=Homo sapiens OX=9606 GN=HEXB PE=1 SV=3	30.8553	1.02851
																UGDH	sp|O60701|UGDH_HUMAN	535_1	sp|O60701|UGDH_HUMAN	30.1194	NA	54989.2	EQIVVDLSHPGVSEDDQVSR;ESSSIYISK;IIDSLFNTVTDK;ILTTNTWSSELSK;INAWNSPTLPIYEPGLK;IPYAPSGEIPK;VLIGGDETPEGQR;VTVVDVNESR	1;1;1;1;1;1;1;1	8	9	0.2126	27035;7314;17992;20409;25509;12182;18087;18088;10504	-	UDP-glucose 6-dehydrogenase OS=Homo sapiens OX=9606 GN=UGDH PE=1 SV=1	1601.31	48.5246
																SDHA	sp|P31040|SDHA_HUMAN	349_1	sp|P31040|SDHA_HUMAN	2.9996	NA	72645.3	SMTLEIR	1	1	1	0.0105	2929	-	Succinate dehydrogenase [ubiquinone] flavoprotein subunit, mitochondrial OS=Homo sapiens OX=9606 GN=SDHA PE=1 SV=2	368.367	10.5248
																IDE	sp|P14735|IDE_HUMAN	564_1	sp|P14735|IDE_HUMAN	2.67772	NA	117893	ESLDDLTNLVVK	1	1	1	0.0118	17508	-	Insulin-degrading enzyme OS=Homo sapiens OX=9606 GN=IDE PE=1 SV=4	139.22	2.48608
																SNX2	sp|O60749|SNX2_HUMAN	205_1	sp|O60749|SNX2_HUMAN	2.36299	NA	58434.7	ALSQLAEVEEK	1	1	1	0.0212	13644	sp|Q13596|SNX1_HUMAN	Sorting nexin-2 OS=Homo sapiens OX=9606 GN=SNX2 PE=1 SV=2	392.356	13.0785
																NASP	sp|P49321|NASP_HUMAN	20_1	sp|P49321|NASP_HUMAN	2.67772	NA	85186.1	EVSEEQPVVTLEK	1	1	1	0.0165	20515	-	Nuclear autoantigenic sperm protein OS=Homo sapiens OX=9606 GN=NASP PE=1 SV=2	240.585	5.72821
																RPS26	sp|P62854|RS26_HUMAN	118_1	sp|P62854|RS26_HUMAN	4.42758	NA	13007.1	DISEASVFDAYVLPK	1	1	1	0.1304	23178	-	40S ribosomal protein S26 OS=Homo sapiens OX=9606 GN=RPS26 PE=1 SV=3	38.2205	6.37009
																TUBB4B	sp|P68371|TBB4B_HUMAN	29_2	sp|P68371|TBB4B_HUMAN	13.2827	NA	49799	ALTVPELTQQMFDAK;AVLVDLEPGTMDSVR;EVDEQMLNVQNK;FPGQLNADLR;FWEVISDEHGIDPTGTYHGDSDLQLER;GHYTEGAELVDSVLDVVR;IMNTFSVVPSPK;INVYYNEATGGK;ISEQFTAMFR;LAVNMVPFPR;NSSYFVEWIPNNVK;TAVCDIPPR;YLTVAAVFR	0;1;0;0;1;0;0;1;0;0;0;0;0	3	6	0.3888	23602;22486;22487;19726;19727;10923;10922;10921;10924;10920;10927;10928;28317;25794;16809;16810;16808;17038;17061;17037;14014;11322;11321;11843;11845;23659;23666;23667;7746;7745;8110	-	Tubulin beta-4B chain OS=Homo sapiens OX=9606 GN=TUBB4B PE=1 SV=1	1436.27	68.3938
																TUBB3	sp|Q13509|TBB3_HUMAN	29_1	sp|Q13509|TBB3_HUMAN	3.38619	NA	50400.3	AILVDLEPGTMDSVR;ALTVPELTQQMFDAK;FPGQLNADLR;FWEVISDEHGIDPSGNYVGDSDLQLER;GHYTEGAELVDSVLDVVR;IMNTFSVVPSPK;ISEQFTAMFR;LAVNMVPFPR;NSSYFVEWIPNNVK	0;0;0;1;0;0;0;0;0	1	1	0.2911	22679;22678;22677;22683;22890;23602;10923;10922;10921;10924;10920;10927;10928;28307;25794;16809;16810;16808;14014;11322;11321;11843;11845;23659;23666;23667	-	Tubulin beta-3 chain OS=Homo sapiens OX=9606 GN=TUBB3 PE=1 SV=2	78.4474	3.73559
																LDHB	sp|P07195|LDHB_HUMAN	157_1	sp|P07195|LDHB_HUMAN	6.91855	NA	36615.1	LIAPVAEEEATVPNNK;SLADELALVDVLEDK	1;1	2	2	0.0928	23642;22863	-	L-lactate dehydrogenase B chain OS=Homo sapiens OX=9606 GN=LDHB PE=1 SV=2	274.653	13.0787
																APOA1	sp|P02647|APOA1_HUMAN	226_1	sp|P02647|APOA1_HUMAN	2.14949	NA	30758.9	DLATVYVDVLK	1	1	1	0.0412	14223	-	Apolipoprotein A-I OS=Homo sapiens OX=9606 GN=APOA1 PE=1 SV=1	34.8754	1.66073
																SEPSECS	sp|Q9HD40|SPCS_HUMAN	539_1	sp|Q9HD40|SPCS_HUMAN	2.4058	NA	55690.5	IDAFVQSLDKNFMVPVGGAIIAGFNDSFIQEISK	1	1	1	0.0679	28440	-	O-phosphoseryl-tRNA(Sec) selenium transferase OS=Homo sapiens OX=9606 GN=SEPSECS PE=1 SV=2	230.528	7.68428
																CAPN2	sp|P17655|CAN2_HUMAN	220_1	sp|P17655|CAN2_HUMAN	15.6643	NA	79944.8	EFYILWTK;IMVDMLDSDGSGK;NPWGEVEWTGR;YLNQDYEALR	1;1;1;1	4	4	0.06	9943;18020;17092;15782	-	Calpain-2 catalytic subunit OS=Homo sapiens OX=9606 GN=CAPN2 PE=1 SV=6	727.88	20.2189
																NUMA1	sp|Q14980|NUMA1_HUMAN	456_1	sp|Q14980|NUMA1_HUMAN	2.30222	NA	238115	ELGELIPLR	1	1	1	0.0043	8112	-	Nuclear mitotic apparatus protein 1 OS=Homo sapiens OX=9606 GN=NUMA1 PE=1 SV=2	60.6762	0.424309
																GNA13	sp|Q14344|GNA13_HUMAN	454_1	sp|Q14344|GNA13_HUMAN	2.04028	NA	44021.7	ILLLGAGESGK	1	1	1	0.0292	8648	sp|Q03113|GNA12_HUMAN	Guanine nucleotide-binding protein subunit alpha-13 OS=Homo sapiens OX=9606 GN=GNA13 PE=1 SV=2	416.256	16.6503
																WARS1	sp|P23381|SYWC_HUMAN	341_1	sp|P23381|SYWC_HUMAN	6.8909	NA	53131.6	DMNQVLDAYENK;MSASDPNSSIFLTDTAK	1;1	2	2	0.0616	19575;24501	-	Tryptophan--tRNA ligase, cytoplasmic OS=Homo sapiens OX=9606 GN=WARS1 PE=1 SV=2	307.285	10.596
																ACTR3	sp|P61158|ARP3_HUMAN	155_1	sp|P61158|ARP3_HUMAN	22.8738	NA	47341	AEPEDHYFLLTEPPLNTPENR;EFSIDVGYER;EVGIPPEQSLETAK;HGIVEDWDLMER;HNPVFGVMS;LSEELSGGR;NIVLSGGSTMFR	1;1;1;1;1;1;1	7	7	0.2081	27699;13559;20733;20757;6554;5431;15724	-	Actin-related protein 3 OS=Homo sapiens OX=9606 GN=ACTR3 PE=1 SV=3	1638.34	78.0161
																IDH1	sp|O75874|IDHC_HUMAN	401_1	sp|O75874|IDHC_HUMAN	7.81377	NA	46629.5	ATDFVVPGPGK;SDYLNTFEFMDK	1;1	2	2	0.0556	9563;20933	-	Isocitrate dehydrogenase [NADP] cytoplasmic OS=Homo sapiens OX=9606 GN=IDH1 PE=1 SV=2	609.972	21.0335
																CAT	sp|P04040|CATA_HUMAN	222_1	sp|P04040|CATA_HUMAN	3.38619	NA	59718.8	GPLLVQDVVFTDEMAHFDR	1	1	1	0.0361	26972	-	Catalase OS=Homo sapiens OX=9606 GN=CAT PE=1 SV=3	44.0542	1.3767
																SUPT16H	sp|Q9Y5B9|SP16H_HUMAN	52_1	sp|Q9Y5B9|SP16H_HUMAN	4.42758	NA	119838	EELEFEVPFR	1	1	1	0.0096	16092	-	FACT complex subunit SPT16 OS=Homo sapiens OX=9606 GN=SUPT16H PE=1 SV=1	111.781	1.7743
																CNN3	sp|Q15417|CNN3_HUMAN	176_1	sp|Q15417|CNN3_HUMAN	2.49097	NA	36390.8	GPSYGLSAEVK	1	1	1	0.0334	10198	sp|Q99439|CNN2_HUMAN	Calponin-3 OS=Homo sapiens OX=9606 GN=CNN3 PE=1 SV=1	533.987	29.6659
																ST13P4	sp|Q8IZP2|ST134_HUMAN	132_1	sp|Q8IZP2|ST134_HUMAN	7.14975	NA	27389.7	AIEINPDSAQPYK;VAAIEALNDGELQK	1;1	2	2	0.1125	19719;20194	sp|P50502|F10A1_HUMAN	Putative protein FAM10A4 OS=Homo sapiens OX=9606 GN=ST13P4 PE=5 SV=1	620.481	41.3654
																ADK	sp|P55263|ADK_HUMAN	499_1	sp|P55263|ADK_HUMAN	2.67772	NA	40519.7	NWMLVEK	1	1	1	0.0193	4680	-	Adenosine kinase OS=Homo sapiens OX=9606 GN=ADK PE=1 SV=2	172.081	7.48178
																DSTN	sp|P60981|DEST_HUMAN	170_1	sp|P60981|DEST_HUMAN	2.9996	NA	18493.5	MIYASSK;YALYDASFETK	0;1	1	1	0.1091	1762;16481	-	Destrin OS=Homo sapiens OX=9606 GN=DSTN PE=1 SV=3	175.413	13.4933
																EIF2AK2	sp|P19525|E2AK2_HUMAN	533_1	sp|P19525|E2AK2_HUMAN	3.12037	NA	62055.6	VLALELFEQITK	1	1	1	0.0218	18805	-	Interferon-induced, double-stranded RNA-activated protein kinase OS=Homo sapiens OX=9606 GN=EIF2AK2 PE=1 SV=2	14.2875	0.5715
																CORO1B	sp|Q9BR76|COR1B_HUMAN	363_1	sp|Q9BR76|COR1B_HUMAN	8.85516	NA	54200.2	AIFLADGK;DADPILISLR	1;1	2	2	0.0368	2555;10350	-	Coronin-1B OS=Homo sapiens OX=9606 GN=CORO1B PE=1 SV=1	772.715	33.5963
																HSP90AB4P	sp|Q58FF6|H90B4_HUMAN	74_1	sp|Q58FF6|H90B4_HUMAN	2.9996	NA	58227.6	EDQTEYLEER;EGLELPEDEEEK;SLIINTFYSNK;VILHLK;YESLTDPSK	0;0;1;0;0	1	1	0.095	16569;16570;16568;16590;19084;16244;406;403;8080;8081;8084;8079;8076	-	Putative heat shock protein HSP 90-beta 4 OS=Homo sapiens OX=9606 GN=HSP90AB4P PE=5 SV=1	239.654	8.55907
																API5	sp|Q9BZZ5|API5_HUMAN	151_1	sp|Q9BZZ5|API5_HUMAN	2.67772	NA	58967.9	DAYQVILDGVK	1	1	1	0.021	13774	-	Apoptosis inhibitor 5 OS=Homo sapiens OX=9606 GN=API5 PE=1 SV=3	22.1319	0.650939
																RANBP17	sp|Q9H2T7|RBP17_HUMAN	384_1	sp|Q9H2T7|RBP17_HUMAN	2.49097	NA	124295	DQFVFR	1	1	1	0.0055	2013	-	Ran-binding protein 17 OS=Homo sapiens OX=9606 GN=RANBP17 PE=2 SV=1	858.302	14.7983
																DLST	sp|P36957|ODO2_HUMAN	172_1	sp|P36957|ODO2_HUMAN	5.9992	NA	48724.5	EAVTFLR;GLVVPVIR	1;1	2	3	0.0331	2587;3011;3012	-	Dihydrolipoyllysine-residue succinyltransferase component of 2-oxoglutarate dehydrogenase complex, mitochondrial OS=Homo sapiens OX=9606 GN=DLST PE=1 SV=4	1030.8	44.8173
																ALDH1A1	sp|P00352|AL1A1_HUMAN	92_1	sp|P00352|AL1A1_HUMAN	4.42758	NA	54826.9	IFINNEWHDSVSGK	1	1	1	0.0279	23072	-	Retinal dehydrogenase 1 OS=Homo sapiens OX=9606 GN=ALDH1A1 PE=1 SV=2	355.814	15.4702
																RCN1	sp|Q15293|RCN1_HUMAN	159_1	sp|Q15293|RCN1_HUMAN	3.38619	NA	38866.2	EIVVLETLEDIDK	1	1	1	0.0393	21064	-	Reticulocalbin-1 OS=Homo sapiens OX=9606 GN=RCN1 PE=1 SV=1	44.4108	2.96072
																BZW1	sp|Q7L1Q6|BZW1_HUMAN	365_1	sp|Q7L1Q6|BZW1_HUMAN	2.38155	NA	48012.7	AEVLSEEPILK	1	1	1	0.0263	13969	-	Basic leucine zipper and W2 domain-containing protein 1 OS=Homo sapiens OX=9606 GN=BZW1 PE=1 SV=1	124.973	4.16576
																DYNC1LI2	sp|O43237|DC1L2_HUMAN	515_1	sp|O43237|DC1L2_HUMAN	3.12037	NA	54065.5	NILVFGEDGSGK	1	1	1	0.0244	14207	-	Cytoplasmic dynein 1 light intermediate chain 2 OS=Homo sapiens OX=9606 GN=DYNC1LI2 PE=1 SV=1	181.636	6.98601
																HADHB	sp|P55084|ECHB_HUMAN	403_1	sp|P55084|ECHB_HUMAN	5.87715	NA	51261.5	EAALGAGFSDK;EVVDYIIFGTVIQEVK	1;1	2	2	0.057	8871;25052	-	Trifunctional enzyme subunit beta, mitochondrial OS=Homo sapiens OX=9606 GN=HADHB PE=1 SV=3	542.395	18.7033
																DDX17	sp|Q92841|DDX17_HUMAN	293_1	sp|Q92841|DDX17_HUMAN	2.67772	NA	80222	LIQLMEEIMAEK	1	1	1	0.0165	19768	-	Probable ATP-dependent RNA helicase DDX17 OS=Homo sapiens OX=9606 GN=DDX17 PE=1 SV=2	49.2129	1.29508
																NUDCD1	sp|Q96RS6|NUDC1_HUMAN	429_1	sp|Q96RS6|NUDC1_HUMAN	2.30222	NA	66713.3	LFVLTTK	1	1	1	0.012	2266	-	NudC domain-containing protein 1 OS=Homo sapiens OX=9606 GN=NUDCD1 PE=1 SV=2	136.029	4.00085
																TTR	sp|P02766|TTHY_HUMAN	96_1	sp|P02766|TTHY_HUMAN	13.2827	NA	15877	GSPAINVAVHVFR;GSPAINVAVHVFRK;YTIAALLSPYSYSTTAVVTNPKE	1;1;1	3	3	0.2517	18019;20675;27718	-	Transthyretin OS=Homo sapiens OX=9606 GN=TTR PE=1 SV=1	399.18	44.3534
																CCT6A	sp|P40227|TCPZ_HUMAN	174_1	sp|P40227|TCPZ_HUMAN	15.0592	NA	57987.6	ALQFLEEVK;QADLYISEGLHPR;SETDTSLIR;TEVNSGFFYK;VATAQDDITGDGTTSNVLIIGELLK	1;1;1;1;1	5	5	0.1243	9218;20749;7556;12828;27813	-	T-complex protein 1 subunit zeta OS=Homo sapiens OX=9606 GN=CCT6A PE=1 SV=3	1596.96	55.0677
																NMT2	sp|O60551|NMT2_HUMAN	94_1	sp|O60551|NMT2_HUMAN	2.46333	NA	56944.1	VAPVLIR	1	1	1	0.0141	1139	sp|P30419|NMT1_HUMAN	Glycylpeptide N-tetradecanoyltransferase 2 OS=Homo sapiens OX=9606 GN=NMT2 PE=1 SV=1	134.935	4.35273
																OTUB1	sp|Q96FW1|OTUB1_HUMAN	139_1	sp|Q96FW1|OTUB1_HUMAN	2.02446	NA	31264.4	LLTSGYLQR	1	1	1	0.0332	8452	-	Ubiquitin thioesterase OTUB1 OS=Homo sapiens OX=9606 GN=OTUB1 PE=1 SV=2	387.921	25.8614
																PSMB1	sp|P20618|PSB1_HUMAN	114_1	sp|P20618|PSB1_HUMAN	4.42758	NA	26472.4	GAVYSFDPVGSYQR	1	1	1	0.0581	21592	-	Proteasome subunit beta type-1 OS=Homo sapiens OX=9606 GN=PSMB1 PE=1 SV=2	261.181	17.4121
																PFN1	sp|P07737|PROF1_HUMAN	425_1	sp|P07737|PROF1_HUMAN	17.7103	NA	15044.6	DSLLQDGEFSMDLR;SSFYVNGLTLGGQK;STGGAPTFNVTVTK;TLVLLMGK	1;1;1;1	4	4	0.3571	22818;20216;18294;3565	-	Profilin-1 OS=Homo sapiens OX=9606 GN=PFN1 PE=1 SV=2	1167.27	129.697
																TMPO	sp|P42167|LAP2B_HUMAN	112_1	sp|P42167|LAP2B_HUMAN	4.42758	NA	50639.5	HASPILPITEFSDIPR	1	1	1	0.0352	12980	-	Lamina-associated polypeptide 2, isoforms beta/gamma OS=Homo sapiens OX=9606 GN=TMPO PE=1 SV=2	103.225	4.129
																SRSF4	sp|Q08170|SRSF4_HUMAN	297_1	sp|Q08170|SRSF4_HUMAN	2.49097	NA	56645.3	ILEVDLK	1	1	1	0.0142	2427	-	Serine/arginine-rich splicing factor 4 OS=Homo sapiens OX=9606 GN=SRSF4 PE=1 SV=2	0	0
																SNRPB2	sp|P08579|RU2B_HUMAN	513_1	sp|P08579|RU2B_HUMAN	2.43429	NA	25470.1	GQAFVIFK	1	1	1	0.0356	4413	sp|P09012|SNRPA_HUMAN	U2 small nuclear ribonucleoprotein B'' OS=Homo sapiens OX=9606 GN=SNRPB2 PE=1 SV=1	191.872	17.4429
																CDC42BPA	sp|Q5VT25|MRCKA_HUMAN	492_1	sp|Q5VT25|MRCKA_HUMAN	2.49097	NA	197182	CHQCTSLMVGLIR	1	1	1	0.0075	22068	-	Serine/threonine-protein kinase MRCK alpha OS=Homo sapiens OX=9606 GN=CDC42BPA PE=1 SV=1	18.1828	0.191398
																DEK	sp|P35659|DEK_HUMAN	490_1	sp|P35659|DEK_HUMAN	2.21929	NA	42647.9	SICEVLDLER	1	1	1	0.0267	14133	-	Protein DEK OS=Homo sapiens OX=9606 GN=DEK PE=1 SV=1	184.033	7.66803
																PURA	sp|Q00577|PURA_HUMAN	291_1	sp|Q00577|PURA_HUMAN	2.14949	NA	34889.4	FFFDVGSNK	1	1	1	0.028	8727	-	Transcriptional activator protein Pur-alpha OS=Homo sapiens OX=9606 GN=PURA PE=1 SV=2	182.799	12.1866
																PTBP1	sp|P26599|PTBP1_HUMAN	6_1	sp|P26599|PTBP1_HUMAN	9.25484	NA	57185.6	IITFTK;LPIDVTEGEVISLGLPFGK;NNQFQALLQYADPVSAQHAK;VLFSSNGGVVK	1;1;1;1	4	4	0.1055	402;25950;20723;10164	-	Polypyrimidine tract-binding protein 1 OS=Homo sapiens OX=9606 GN=PTBP1 PE=1 SV=1	1104.66	50.2117
																QARS1	sp|P47897|SYQ_HUMAN	380_1	sp|P47897|SYQ_HUMAN	2.67772	NA	87742.9	GFHQVPFAPIVFIER	1	1	1	0.0194	24240	-	Glutamine--tRNA ligase OS=Homo sapiens OX=9606 GN=QARS1 PE=1 SV=1	59.6485	1.19297
																ETF1	sp|P62495|ERF1_HUMAN	21_1	sp|P62495|ERF1_HUMAN	2.9996	NA	49000.1	FTVDLPK	1	1	1	0.016	2211	-	Eukaryotic peptide chain release factor subunit 1 OS=Homo sapiens OX=9606 GN=ETF1 PE=1 SV=3	162.237	6.00878
																XPNPEP3	sp|Q9NQH7|XPP3_HUMAN	180_1	sp|Q9NQH7|XPP3_HUMAN	2.49097	NA	56996.8	AILFVPR	1	1	2	0.0138	2128;2129	-	Xaa-Pro aminopeptidase 3 OS=Homo sapiens OX=9606 GN=XPNPEP3 PE=1 SV=1	1479.02	51.0007
																PCYOX1	sp|Q9UHG3|PCYOX_HUMAN	386_1	sp|Q9UHG3|PCYOX_HUMAN	4.42758	NA	56603.7	SDFYDIVLVATPLNR	1	1	1	0.0297	23922	-	Prenylcysteine oxidase 1 OS=Homo sapiens OX=9606 GN=PCYOX1 PE=1 SV=3	26.2173	1.00836
																CNDP2	sp|Q96KP4|CNDP2_HUMAN	46_1	sp|Q96KP4|CNDP2_HUMAN	9.65554	NA	52844.9	GNILIPGINEAVAAVTEEEHK;LPDGSEIPLPPILLGR;TVFGVEPDLTR	1;1;1	3	3	0.1011	27022;23546;14159	-	Cytosolic non-specific dipeptidase OS=Homo sapiens OX=9606 GN=CNDP2 PE=1 SV=2	460.315	15.8729
																PNP	sp|P00491|PNPH_HUMAN	536_1	sp|P00491|PNPH_HUMAN	9.28004	NA	32097.2	DHINLPGFSGQNPLR;LVFGFLNGR;VIMDYESLEK	1;1;1	3	3	0.1176	23309;7621;13933	-	Purine nucleoside phosphorylase OS=Homo sapiens OX=9606 GN=PNP PE=1 SV=2	380.793	17.3088
																ASNS	sp|P08243|ASNS_HUMAN	453_1	sp|P08243|ASNS_HUMAN	4.42758	NA	64328.6	EAFSDGITSVK	1	1	1	0.0196	11627	-	Asparagine synthetase [glutamine-hydrolyzing] OS=Homo sapiens OX=9606 GN=ASNS PE=1 SV=4	207.07	5.75194
																LAP3	sp|P28838|AMPL_HUMAN	182_1	sp|P28838|AMPL_HUMAN	9.19637	NA	56130.8	GITFDSGGISIK;GSDEPPVFLEIHYK;LFEASIETGDR	1;1;1	3	3	0.0713	12951;22870;14267	-	Cytosol aminopeptidase OS=Homo sapiens OX=9606 GN=LAP3 PE=1 SV=3	461.008	13.5591
																PACSIN2	sp|Q9UNF0|PACN2_HUMAN	423_1	sp|Q9UNF0|PACN2_HUMAN	2.67772	NA	55703.9	ASLMNDDFEK	1	1	1	0.0206	12088	-	Protein kinase C and casein kinase substrate in neurons protein 2 OS=Homo sapiens OX=9606 GN=PACSIN2 PE=1 SV=2	128.71	5.14839
																KPNB1	sp|Q14974|IMB1_HUMAN	199_1	sp|Q14974|IMB1_HUMAN	13.2827	NA	97108	ESCLEAYTGIVQGLK;SDYDMVDYLNELR;SSAYESLMEIVK	1;1;1	3	3	0.0457	23325;22896;17770	-	Importin subunit beta-1 OS=Homo sapiens OX=9606 GN=KPNB1 PE=1 SV=2	302.113	7.95033
																RTCB	sp|Q9Y3I0|RTCB_HUMAN	451_1	sp|Q9Y3I0|RTCB_HUMAN	2.55024	NA	55174.9	LMFEELR	1	1	1	0.0139	5164	-	RNA-splicing ligase RtcB homolog OS=Homo sapiens OX=9606 GN=RTCB PE=1 SV=1	278.469	9.60239
																EIF5A2	sp|Q9GZV4|IF5A2_HUMAN	197_1	sp|Q9GZV4|IF5A2_HUMAN	2.36299	NA	16782.2	NGFVVLK	1	1	1	0.0458	1331	sp|P63241|IF5A1_HUMAN;sp|Q6IS14|IF5AL_HUMAN	Eukaryotic translation initiation factor 5A-2 OS=Homo sapiens OX=9606 GN=EIF5A2 PE=1 SV=3	122.661	15.3326
																DHX15	sp|O43143|DHX15_HUMAN	137_1	sp|O43143|DHX15_HUMAN	2.03128	NA	90875.2	TLATDILMGVLK	1	1	1	0.0151	15521	-	Pre-mRNA-splicing factor ATP-dependent RNA helicase DHX15 OS=Homo sapiens OX=9606 GN=DHX15 PE=1 SV=2	19.1363	0.445031
																SEPTIN9	sp|Q9UHD8|SEPT9_HUMAN	421_1	sp|Q9UHD8|SEPT9_HUMAN	8.85226	NA	65360.8	ADTLTLEER;STLINTLFK;VPEVPTAPATDAAPK	1;1;1	3	3	0.0563	8349;8012;20079	-	Septin-9 OS=Homo sapiens OX=9606 GN=SEPTIN9 PE=1 SV=2	1569.69	40.2485
																EIF3L	sp|Q9Y262|EIF3L_HUMAN	270_1	sp|Q9Y262|EIF3L_HUMAN	2.49097	NA	66684.4	YGDFFIR	1	1	1	0.0124	4601	-	Eukaryotic translation initiation factor 3 subunit L OS=Homo sapiens OX=9606 GN=EIF3L PE=1 SV=1	90.3024	2.82195
																LMNB2	sp|Q03252|LMNB2_HUMAN	276_1	sp|Q03252|LMNB2_HUMAN	10.9423	NA	69905.7	ALYESELADAR;QVLEGEEIAYK;TVLVNADGEEVAMR	1;1;1	3	3	0.0581	14268;15634;20836	-	Lamin-B2 OS=Homo sapiens OX=9606 GN=LMNB2 PE=1 SV=4	802.582	19.5752
																PRKCSH	sp|P14314|GLU2B_HUMAN	25_1	sp|P14314|GLU2B_HUMAN	2.55024	NA	59387.8	ESLQQMAEVTR	1	1	1	0.0208	15995	-	Glucosidase 2 subunit beta OS=Homo sapiens OX=9606 GN=PRKCSH PE=1 SV=2	197.28	10.3832
																SEPTIN11	sp|Q9NVA2|SEP11_HUMAN	178_1	sp|Q9NVA2|SEP11_HUMAN	2.9996	NA	49367.2	VNIIPIIAK	1	1	1	0.021	6370	sp|Q14141|SEPT6_HUMAN;sp|Q92599|SEPT8_HUMAN	Septin-11 OS=Homo sapiens OX=9606 GN=SEPTIN11 PE=1 SV=3	75.6893	3.15372
																PGAM1	sp|P18669|PGAM1_HUMAN	303_1	sp|P18669|PGAM1_HUMAN	11.9755	NA	28785.8	ALPFWNEEIVPQIK;HGESAWNLENR;SYDVPPPPMEPDHPFYSNISK	1;1;1	3	3	0.1811	23510;16593;22616	-	Phosphoglycerate mutase 1 OS=Homo sapiens OX=9606 GN=PGAM1 PE=1 SV=2	296.599	19.7733
																CD44	sp|P16070|CD44_HUMAN	507_1	sp|P16070|CD44_HUMAN	8.85516	NA	81487.4	ESSETPDQFMTADETR;YGFIEGHVVIPR	1;1	2	2	0.0377	24981;18455	-	CD44 antigen OS=Homo sapiens OX=9606 GN=CD44 PE=1 SV=3	415.081	13.3897
																PSMA4	sp|P25789|PSA4_HUMAN	48_1	sp|P25789|PSA4_HUMAN	4.42758	NA	29465.2	LLDEVFFSEK	1	1	1	0.0383	13934	-	Proteasome subunit alpha type-4 OS=Homo sapiens OX=9606 GN=PSMA4 PE=1 SV=1	49.87	3.56214
																HADHA	sp|P40939|ECHA_HUMAN	382_1	sp|P40939|ECHA_HUMAN	10.3047	NA	82946.9	DGPGFYTTR;DLNSDMDSILASLK;MGLVDQLVEPLGPGLKPPEER	1;1;1	3	3	0.0577	7296;21171;27257	-	Trifunctional enzyme subunit alpha, mitochondrial OS=Homo sapiens OX=9606 GN=HADHA PE=1 SV=2	631.035	14.3417
																LARS1	sp|Q9P2J5|SYLC_HUMAN	119_1	sp|Q9P2J5|SYLC_HUMAN	8.87675	NA	134379	QEFEFWYPVDLR;SLGLSDEEIVK;VFASELNAGIIK	1;1;1	3	3	0.0298	22846;12774;15104	-	Leucine--tRNA ligase, cytoplasmic OS=Homo sapiens OX=9606 GN=LARS1 PE=1 SV=2	402.38	6.38699
																RBBP4	sp|Q09028|RBBP4_HUMAN	301_1	sp|Q09028|RBBP4_HUMAN	8.0336	NA	47626.1	LMIWDTR;LNVWDLSK;TPSSDVLVFDYTK	1;1;1	3	3	0.0659	5104;6182;20215	sp|Q16576|RBBP7_HUMAN	Histone-binding protein RBBP4 OS=Homo sapiens OX=9606 GN=RBBP4 PE=1 SV=3	785.253	52.3502
																MAPRE1	sp|Q15691|MARE1_HUMAN	457_1	sp|Q15691|MARE1_HUMAN	2.67772	NA	29980.2	LTVEDLEK	1	1	1	0.0299	5410	-	Microtubule-associated protein RP/EB family member 1 OS=Homo sapiens OX=9606 GN=MAPRE1 PE=1 SV=3	277.982	15.4434
																ARHGAP1	sp|Q07960|RHG01_HUMAN	195_1	sp|Q07960|RHG01_HUMAN	4.42758	NA	50404.2	NPEQEPIPIVLR	1	1	1	0.0273	18834	-	Rho GTPase-activating protein 1 OS=Homo sapiens OX=9606 GN=ARHGAP1 PE=1 SV=1	606.36	23.3215
																PRPF19	sp|Q9UMS4|PRP19_HUMAN	404_1	sp|Q9UMS4|PRP19_HUMAN	2.9996	NA	55146.3	NVVVFDK	1	1	1	0.0139	2232	-	Pre-mRNA-processing factor 19 OS=Homo sapiens OX=9606 GN=PRPF19 PE=1 SV=1	1241.21	65.3268
																CSDE1	sp|O75534|CSDE1_HUMAN	455_1	sp|O75534|CSDE1_HUMAN	2.21929	NA	88828.9	EAFGFIER	1	1	1	0.01	5999	-	Cold shock domain-containing protein E1 OS=Homo sapiens OX=9606 GN=CSDE1 PE=1 SV=2	227.162	4.13022
																HARS1	sp|P12081|HARS1_HUMAN	406_1	sp|P12081|HARS1_HUMAN	2.06169	NA	57374.2	IFSIVEQR	1	1	1	0.0157	6715	-	Histidine--tRNA ligase, cytoplasmic OS=Homo sapiens OX=9606 GN=HARS1 PE=1 SV=2	291.973	8.58744
																PGM2	sp|Q96G03|PGM2_HUMAN	272_1	sp|Q96G03|PGM2_HUMAN	2.06169	NA	68240.4	IVLANDPDADR	1	1	1	0.018	13051	-	Phosphoglucomutase-2 OS=Homo sapiens OX=9606 GN=PGM2 PE=1 SV=4	302.345	7.75244
																CPNE1	sp|Q99829|CPNE1_HUMAN	158_1	sp|Q99829|CPNE1_HUMAN	9.90129	NA	59021.5	DIVQFVPYR;SDPFLEFFR;VVTMEVEAR	1;1;1	3	3	0.0503	11119;11744;7928	-	Copine-1 OS=Homo sapiens OX=9606 GN=CPNE1 PE=1 SV=1	777.682	38.8841
																EIF3J	sp|O75822|EIF3J_HUMAN	571_1	sp|O75822|EIF3J_HUMAN	2.21929	NA	29044.5	DDFTEFGK	1	1	1	0.031	5734	-	Eukaryotic translation initiation factor 3 subunit J OS=Homo sapiens OX=9606 GN=EIF3J PE=1 SV=2	129.9	8.11874
																ACADVL	sp|P49748|ACADV_HUMAN	111_1	sp|P49748|ACADV_HUMAN	2.9996	NA	70345.4	IFEGTNDILR	1	1	1	0.0153	12392	-	Very long-chain specific acyl-CoA dehydrogenase, mitochondrial OS=Homo sapiens OX=9606 GN=ACADVL PE=1 SV=1	261.588	6.08344
																RPL15	sp|P61313|RL15_HUMAN	307_1	sp|P61313|RL15_HUMAN	2.49097	NA	24131.1	YIQELWR	1	1	1	0.0343	7156	-	60S ribosomal protein L15 OS=Homo sapiens OX=9606 GN=RPL15 PE=1 SV=2	198.049	14.1463
																SSR4	sp|P51571|SSRD_HUMAN	279_1	sp|P51571|SSRD_HUMAN	4.42758	NA	18986.6	FFDEESYSLLR	1	1	1	0.0636	18837	-	Translocon-associated protein subunit delta OS=Homo sapiens OX=9606 GN=SSR4 PE=1 SV=1	142.504	15.8337
																RPS10P5	sp|Q9NQ39|RS10L_HUMAN	175_1	sp|Q9NQ39|RS10L_HUMAN	2.88442	NA	20107.5	AEAGAGSATEFQFR	1	1	1	0.0795	19607	sp|P46783|RS10_HUMAN	Putative 40S ribosomal protein S10-like OS=Homo sapiens OX=9606 GN=RPS10P5 PE=5 SV=1	270.476	22.5397
																PDCD6IP	sp|Q8WUM4|PDC6I_HUMAN	67_1	sp|Q8WUM4|PDC6I_HUMAN	9.80873	NA	95963.1	ELPELLQR;LLDEEEATDNDLR;SLLSNLDEVK	1;1;1	3	3	0.0357	6861;21359;10516	-	Programmed cell death 6-interacting protein OS=Homo sapiens OX=9606 GN=PDCD6IP PE=1 SV=1	850.642	15.7526
																EIF3D	sp|O15371|EIF3D_HUMAN	354_1	sp|O15371|EIF3D_HUMAN	2.51031	NA	63932.4	LGDDIDLIVR	1	1	1	0.0182	10871	-	Eukaryotic translation initiation factor 3 subunit D OS=Homo sapiens OX=9606 GN=EIF3D PE=1 SV=1	272.71	10.1004
																ERP44	sp|Q9BS26|ERP44_HUMAN	498_1	sp|Q9BS26|ERP44_HUMAN	2.06169	NA	46941.4	DLAEITTLDR	1	1	1	0.0246	11412	-	Endoplasmic reticulum resident protein 44 OS=Homo sapiens OX=9606 GN=ERP44 PE=1 SV=1	330.462	15.021
																SLC9A3R1	sp|O14745|NHRF1_HUMAN	177_1	sp|O14745|NHRF1_HUMAN	2.36299	NA	38844.6	LLVVDPETDEQLQK	1	1	1	0.0391	22833	-	Na(+)/H(+) exchange regulatory cofactor NHE-RF1 OS=Homo sapiens OX=9606 GN=SLC9A3R1 PE=1 SV=4	264.129	9.78254
																MSH2	sp|P43246|MSH2_HUMAN	152_1	sp|P43246|MSH2_HUMAN	4.42758	NA	104677	DSLIIIDELGR	1	1	1	0.0118	14498	-	DNA mismatch repair protein Msh2 OS=Homo sapiens OX=9606 GN=MSH2 PE=1 SV=1	78.2023	1.53338
																COPB1	sp|P53618|COPB_HUMAN	305_1	sp|P53618|COPB_HUMAN	2.72217	NA	107074	NVEELVIVLK	1	1	1	0.0105	11708	-	Coatomer subunit beta OS=Homo sapiens OX=9606 GN=COPB1 PE=1 SV=3	109.509	1.95552
																COTL1	sp|Q14019|COTL1_HUMAN	171_1	sp|Q14019|COTL1_HUMAN	2.88442	NA	15935	ELEEDFIK	1	1	1	0.0563	7579	-	Coactosin-like protein OS=Homo sapiens OX=9606 GN=COTL1 PE=1 SV=3	298.949	29.8949
																AP2B1	sp|P63010|AP2B1_HUMAN	47_1	sp|P63010|AP2B1_HUMAN	11.3461	NA	104486	EYATEVDVDFVR;LASQANIAQVLAELK;YNDPIYVK	1;1;1	3	3	0.0374	19629;21979;7250	sp|Q10567|AP1B1_HUMAN	AP-2 complex subunit beta OS=Homo sapiens OX=9606 GN=AP2B1 PE=1 SV=1	629.447	13.3925
																EML4	sp|Q9HC35|EMAL4_HUMAN	298_1	sp|Q9HC35|EMAL4_HUMAN	31.6005	NA	108848	ADQFLVGTSR;DMSIIQWK;DVIINQEGEYIK;EIEVPDQYGTIR;IILWDHDLNPER;LSLPQNETVADTTLTK;VIAVADDFCK;VQQQEDEITVLK;WFVLDAETR	1;1;1;1;1;1;1;1;1	9	9	0.103	9761;7523;19181;19154;21163;23995;11143;19386;11108	-	Echinoderm microtubule-associated protein-like 4 OS=Homo sapiens OX=9606 GN=EML4 PE=1 SV=3	2424.27	42.5311
																IARS1	sp|P41252|SYIC_HUMAN	41_1	sp|P41252|SYIC_HUMAN	14.2014	NA	144406	LYLINSPVVR;NNDLCYWVPELVR;QLSSEELEQFQK;SVVTSIFGVK	1;1;1;1	4	4	0.0357	12269;23444;20101;8013	-	Isoleucine--tRNA ligase, cytoplasmic OS=Homo sapiens OX=9606 GN=IARS1 PE=1 SV=2	557.179	8.57198
																PDHA1	sp|P08559|ODPA_HUMAN	402_1	sp|P08559|ODPA_HUMAN	2.32051	NA	43267.6	EILAELTGR	1	1	1	0.0231	6977	-	Pyruvate dehydrogenase E1 component subunit alpha, somatic form, mitochondrial OS=Homo sapiens OX=9606 GN=PDHA1 PE=1 SV=3	282.799	11.3119
																ARPC2	sp|O15144|ARPC2_HUMAN	290_1	sp|O15144|ARPC2_HUMAN	8.85516	NA	34311.5	VFMQEFK;YFQFQEEGK	1;1	2	2	0.0533	4922;12306	-	Actin-related protein 2/3 complex subunit 2 OS=Homo sapiens OX=9606 GN=ARPC2 PE=1 SV=1	583.132	26.506
																CKAP4	sp|Q07065|CKAP4_HUMAN	540_1	sp|Q07065|CKAP4_HUMAN	2.06169	NA	65982.7	GLLDDLR	1	1	1	0.0116	1808	-	Cytoskeleton-associated protein 4 OS=Homo sapiens OX=9606 GN=CKAP4 PE=1 SV=2	167.551	3.72336
																EIF3A	sp|Q14152|EIF3A_HUMAN	292_1	sp|Q14152|EIF3A_HUMAN	4.58378	NA	166468	LLLTPWVK;VSTVFWK	1;1	2	2	0.0109	6040;3353	-	Eukaryotic translation initiation factor 3 subunit A OS=Homo sapiens OX=9606 GN=EIF3A PE=1 SV=1	271.86	2.92323
																ANXA7	sp|P20073|ANXA7_HUMAN	97_1	sp|P20073|ANXA7_HUMAN	2.21929	NA	52705.8	SEIDLVQIK	1	1	1	0.0184	8255	-	Annexin A7 OS=Homo sapiens OX=9606 GN=ANXA7 PE=1 SV=3	464.113	20.1788
																HNRNPUL2	sp|Q1KMD3|HNRL2_HUMAN	45_1	sp|Q1KMD3|HNRL2_HUMAN	2.9996	NA	85052.2	VVVVVPNEEDWK	1	1	1	0.0161	19004	-	Heterogeneous nuclear ribonucleoprotein U-like protein 2 OS=Homo sapiens OX=9606 GN=HNRNPUL2 PE=1 SV=1	581.409	14.1807
																RPL6	sp|Q02878|RL6_HUMAN	575_1	sp|Q02878|RL6_HUMAN	9.51332	NA	32707.6	AIPQLQGYLR;AVDSQILPK;HQEGEIFDTEK;SVFALTNGIYPHK	1;1;1;1	4	4	0.1493	11814;6053;17145;19772	-	60S ribosomal protein L6 OS=Homo sapiens OX=9606 GN=RPL6 PE=1 SV=3	1251.87	65.8881
																TUFM	sp|P49411|EFTU_HUMAN	275_1	sp|P49411|EFTU_HUMAN	16.8086	NA	49510.2	AEAGDNLGALVR;DLEKPFLLPVEAVYSVPGR;ELLTEFGYK;LLDAVDTYIPVPAR;QIGVEHVVVYVNK	1;1;1;1;1	5	5	0.1482	12642;26700;9933;21550;6657	-	Elongation factor Tu, mitochondrial OS=Homo sapiens OX=9606 GN=TUFM PE=1 SV=2	1789.88	55.9336
																ETFB	sp|P38117|ETFB_HUMAN	542_1	sp|P38117|ETFB_HUMAN	8.85516	NA	27826.2	EIDGGLETLR;LSVISVEDPPQR	1;1	2	2	0.0863	10029;17336	-	Electron transfer flavoprotein subunit beta OS=Homo sapiens OX=9606 GN=ETFB PE=1 SV=3	767.147	51.1431
																RANBP1	sp|P43487|RANG_HUMAN	559_1	sp|P43487|RANG_HUMAN	4.42758	NA	23295.6	FASENDLPEWK	1	1	1	0.0547	17235	-	Ran-specific GTPase-activating protein OS=Homo sapiens OX=9606 GN=RANBP1 PE=1 SV=1	0	0
																EIF3B	sp|P55884|EIF3B_HUMAN	428_1	sp|P55884|EIF3B_HUMAN	13.813	NA	92423.8	DRPQEADGIDSVIVVDNVPQVGPDR;GTQGVVTNFEIFR;ITNDFYPEEDGK;VNLFTDFDK	1;1;1;1	4	4	0.0725	27984;20165;19326;9903	-	Eukaryotic translation initiation factor 3 subunit B OS=Homo sapiens OX=9606 GN=EIF3B PE=1 SV=3	542.774	14.6696
																SIMC1	sp|Q8NDZ2|SIMC1_HUMAN	63_1	sp|Q8NDZ2|SIMC1_HUMAN	2.9996	NA	96777	QNIPGPPQDSLGLPQDVPGLPQSILHPQDVAYLQDMPR	1	1	1	0.0436	28471	-	SUMO-interacting motif-containing protein 1 OS=Homo sapiens OX=9606 GN=SIMC1 PE=1 SV=3	168.96	3.84
																TUBA1A	sp|Q71U36|TBA1A_HUMAN	258_2	sp|Q71U36|TBA1A_HUMAN	20.2013	NA	50103.6	AFVHWYVGEGMEEGEFSEAR;AVCMLSNTTAIAEAWAR;AVFVDLEPTVIDEVR;DVNAAIATIK;EDMAALEK;EIIDLVLDR;FDGALNVDLTEFQTNLVPYPR;FDLMYAK;IHFPLATYAPVISAEK;LSVDYGK;NLDIERPTYTNLNR;TIGGGDDSFNTFFSETGAGK;TIQFVDWCPTGFK;VGINYQPPTVVPGGDLAK	0;0;1;1;0;1;0;0;0;0;0;1;1;0	5	10	0.4324	27395;27394;27396;25148;23701;23700;23702;23696;23699;7392;7391;4316;4313;9496;27584;3842;24248;24244;24245;24249;24247;24246;1393;1398;1387;1394;23886;26097;22438;24821;24822;24820	-	Tubulin alpha-1A chain OS=Homo sapiens OX=9606 GN=TUBA1A PE=1 SV=1	2550.55	115.934
																TES	sp|Q9UGI8|TES_HUMAN	544_1	sp|Q9UGI8|TES_HUMAN	2.57854	NA	47963.9	EGDPAIYAER	1	1	1	0.0238	10602	-	Testin OS=Homo sapiens OX=9606 GN=TES PE=1 SV=1	330.636	12.2458
																PSMC1	sp|P62191|PRS4_HUMAN	352_1	sp|P62191|PRS4_HUMAN	6.91855	NA	49153.7	TMLELLNQLDGFDSR;VAEEHAPSIVFIDEIDAIGTK	1;1	2	2	0.0818	24191;27193	-	26S proteasome regulatory subunit 4 OS=Homo sapiens OX=9606 GN=PSMC1 PE=1 SV=1	54.7825	2.02898
																ACTG1	sp|P63261|ACTG_HUMAN	68_2	sp|P63261|ACTG_HUMAN	31.0533	NA	41765.8	AGFAGDDAPR;DLTDYLMK;DLYANTVLSGGTTMYPGIADR;DSYVGDEAQSK;EEEIAALVIDNGSGMCK;EITALAPSTMK;GYSFTTTAER;HQGVMVGMGQK;IIAPPER;IWHHTFYNELR;KDLYANTVLSGGTTMYPGIADR;LCYVALDFEQEMATAASSSSLEK;QEYDESGPSIVHR;SYELPDGQVITIGNER;TTGIVMDSGDGVTHTVPIYEGYALPHAILR;VAPEEHPVLLTEAPLNPK	0;0;1;0;1;0;1;0;0;0;1;1;1;0;1;1	8	23	0.5813	6231;6235;6230;6233;6228;6227;6229;6876;6874;27055;27117;13041;24910;11901;11899;10981;10984;10982;10983;12160;1704;1705;1707;1703;21053;21052;27469;27822;21070;20755;21076;21075;20756;21074;21069;21077;24561;24562;24564;24559;24560;24578;28331;28333;25774;25773;25771;25769	-	Actin, cytoplasmic 2 OS=Homo sapiens OX=9606 GN=ACTG1 PE=1 SV=1	44572.1	1937.92
																GSS	sp|P48637|GSHB_HUMAN	253_1	sp|P48637|GSHB_HUMAN	2.43429	NA	52352.3	SDYMFQR	1	1	1	0.0148	5401	-	Glutathione synthetase OS=Homo sapiens OX=9606 GN=GSS PE=1 SV=1	138.481	4.1964
																LMAN1	sp|P49257|LMAN1_HUMAN	551_1	sp|P49257|LMAN1_HUMAN	2.32051	NA	57513	YVSSLTEEISK	1	1	1	0.0216	14888	-	Protein ERGIC-53 OS=Homo sapiens OX=9606 GN=LMAN1 PE=1 SV=2	281.357	11.2543
																BAG2	sp|O95816|BAG2_HUMAN	124_1	sp|O95816|BAG2_HUMAN	2.02446	NA	23757.2	LLESLDQLELR	1	1	1	0.0521	17051	-	BAG family molecular chaperone regulator 2 OS=Homo sapiens OX=9606 GN=BAG2 PE=1 SV=1	88.852	5.55325
																ACLY	sp|P53396|ACLY_HUMAN	378_1	sp|P53396|ACLY_HUMAN	11.0744	NA	120762	LTLLNPK;TIAIIAEGIPEALTR;TTDGVYEGVAIGGDR	1;1;1	3	3	0.0336	1752;21962;20936	-	ATP-citrate synthase OS=Homo sapiens OX=9606 GN=ACLY PE=1 SV=3	528.087	8.51754
																PRDX2	sp|P32119|PRDX2_HUMAN	93_1	sp|P32119|PRDX2_HUMAN	6.8909	NA	21878.2	ATAVVDGAFK;GLFIIDGK;QITVNDLPVGR	1;1;0	2	2	0.1465	6298;3259;13466	-	Peroxiredoxin-2 OS=Homo sapiens OX=9606 GN=PRDX2 PE=1 SV=5	979.527	89.048
																PRPF18	sp|Q99633|PRP18_HUMAN	358_1	sp|Q99633|PRP18_HUMAN	2.14949	NA	39835	EEDQKPLTSSNPVLELELAEEK	1	1	1	0.0643	14703	-	Pre-mRNA-splicing factor 18 OS=Homo sapiens OX=9606 GN=PRPF18 PE=1 SV=1	191.558	9.1218
																CAPZB	sp|P47756|CAPZB_HUMAN	257_1	sp|P47756|CAPZB_HUMAN	7.42718	NA	31330.8	STLNEIYFGK;YDPPLEDGAMPSAR	1;1	2	2	0.0866	12173;21115	-	F-actin-capping protein subunit beta OS=Homo sapiens OX=9606 GN=CAPZB PE=1 SV=4	968.302	48.4151
																ASPH	sp|Q12797|ASPH_HUMAN	210_1	sp|Q12797|ASPH_HUMAN	9.13805	NA	85809.4	GLFLPEDENLR;GSLLTLQR;LGIYDADGDGDFDVDDAK	1;1;1	3	3	0.0488	16334;3868;25412	-	Aspartyl/asparaginyl beta-hydroxylase OS=Homo sapiens OX=9606 GN=ASPH PE=1 SV=3	837.592	23.2665
																ACTR1A	sp|P61163|ACTZ_HUMAN	526_1	sp|P61163|ACTZ_HUMAN	4.42758	NA	42586.9	DQLQTFSEEHPVLLTEAPLNPR	1	1	1	0.0585	27798	-	Alpha-centractin OS=Homo sapiens OX=9606 GN=ACTR1A PE=1 SV=1	46.8503	2.03697
																PRDX5	sp|P30044|PRDX5_HUMAN	422_1	sp|P30044|PRDX5_HUMAN	8.85516	NA	22072.5	FSMVVQDGIVK;VNLAELFK	1;1	2	2	0.0888	13851;5096	-	Peroxiredoxin-5, mitochondrial OS=Homo sapiens OX=9606 GN=PRDX5 PE=1 SV=4	309.608	23.816
																DYNC1H1	sp|Q14204|DYHC1_HUMAN	181_1	sp|Q14204|DYHC1_HUMAN	16.7217	NA	532072	FNYGFEYLGVQDK;LGGSPFGPAGTGK;LNTQEIFDDWAR;TSFLDDAFR;YAPLGWSK;YTGEDFDEDLR	1;1;1;1;1;1	6	6	0.0142	22145;11389;20922;9020;4726;17834	-	Cytoplasmic dynein 1 heavy chain 1 OS=Homo sapiens OX=9606 GN=DYNC1H1 PE=1 SV=5	1189.87	4.2344
																PSMD6	sp|Q15008|PSMD6_HUMAN	374_1	sp|Q15008|PSMD6_HUMAN	2.55024	NA	45502.3	GAEILEVLHSLPAVR	1	1	1	0.0386	8988	-	26S proteasome non-ATPase regulatory subunit 6 OS=Homo sapiens OX=9606 GN=PSMD6 PE=1 SV=1	88.1819	3.04076
																PPAT	sp|Q06203|PUR1_HUMAN	553_1	sp|Q06203|PUR1_HUMAN	4.42758	NA	57362.4	IVLVDDSIVR	1	1	1	0.0193	10874	-	Amidophosphoribosyltransferase OS=Homo sapiens OX=9606 GN=PPAT PE=1 SV=1	137.102	5.4841
																ACTR2	sp|P61160|ARP2_HUMAN	488_1	sp|P61160|ARP2_HUMAN	13.2827	NA	44732.2	DLMVGDEASELR;HLWDYTFGPEK;ILLTEPPMNPTK	1;1;1	3	5	0.0888	17204;17201;18575;17718;17719	-	Actin-related protein 2 OS=Homo sapiens OX=9606 GN=ACTR2 PE=1 SV=1	1128.99	53.7616
																PAICS	sp|P22234|PUR6_HUMAN	524_1	sp|P22234|PUR6_HUMAN	10.9168	NA	47049.1	DDANNDPQWSEEQLIAAK;EIVLADVIDNDSWR;VELFFK	1;1;1	3	3	0.0894	26294;23061;1419	-	Multifunctional protein ADE2 OS=Homo sapiens OX=9606 GN=PAICS PE=1 SV=3	431.552	16.5981
																DISC1	sp|Q9NRI5|DISC1_HUMAN	420_1	sp|Q9NRI5|DISC1_HUMAN	2.9996	NA	93552	SLNLSLK	1	1	1	0.0082	1266	-	Disrupted in schizophrenia 1 protein OS=Homo sapiens OX=9606 GN=DISC1 PE=1 SV=3	258.779	4.88262
																ARPC1B	sp|O15143|ARC1B_HUMAN	548_1	sp|O15143|ARC1B_HUMAN	4.84707	NA	40923.4	EHNGQVTGIDWAPESNR;NAYVWTLK	1;1	2	3	0.0672	25494;6803;6802	-	Actin-related protein 2/3 complex subunit 1B OS=Homo sapiens OX=9606 GN=ARPC1B PE=1 SV=3	370.859	19.5189
																ETFA	sp|P13804|ETFA_HUMAN	76_1	sp|P13804|ETFA_HUMAN	5.32011	NA	35057.6	AAVDAGFVPNDMQVGQTGK;LEVAPISDIIAIK	1;1	2	2	0.0961	25439;18347	-	Electron transfer flavoprotein subunit alpha, mitochondrial OS=Homo sapiens OX=9606 GN=ETFA PE=1 SV=1	447.022	19.4357
																UBA2	sp|Q9UBT2|SAE2_HUMAN	183_1	sp|Q9UBT2|SAE2_HUMAN	2.14949	NA	71179.2	DVEFEVVGDAPEK	1	1	1	0.0203	19450	-	SUMO-activating enzyme subunit 2 OS=Homo sapiens OX=9606 GN=UBA2 PE=1 SV=2	372.665	10.9607
																STIP1	sp|P31948|STIP1_HUMAN	251_1	sp|P31948|STIP1_HUMAN	13.2827	NA	62599.4	AAALEFLNR;LMDVGLIAIR;TLLSDPTYR	1;1;1	3	3	0.0516	7065;9987;8893	-	Stress-induced-phosphoprotein 1 OS=Homo sapiens OX=9606 GN=STIP1 PE=1 SV=1	1377.84	32.0428
																RAN	sp|P62826|RAN_HUMAN	522_1	sp|P62826|RAN_HUMAN	13.2827	NA	24407.6	FNVWDTAGQEK;LVLVGDGGTGK;NLQYYDISAK	1;1;1	3	4	0.1481	16084;7393;7390;13572	-	GTP-binding nuclear protein Ran OS=Homo sapiens OX=9606 GN=RAN PE=1 SV=3	2052.96	186.633
																ADRM1	sp|Q16186|ADRM1_HUMAN	185_1	sp|Q16186|ADRM1_HUMAN	2.49097	NA	42126.8	LFFWMQEPK	1	1	1	0.0221	13905	-	Proteasomal ubiquitin receptor ADRM1 OS=Homo sapiens OX=9606 GN=ADRM1 PE=1 SV=2	43.3734	3.61445
																KPRP	sp|Q5T749|KPRP_HUMAN	235_1	sp|Q5T749|KPRP_HUMAN	2.14949	NA	64093.2	LDQCPESPLQR	1	1	1	0.019	17403	-	Keratinocyte proline-rich protein OS=Homo sapiens OX=9606 GN=KPRP PE=1 SV=1	59.5488	2.83566
																EHD1	sp|Q9H4M9|EHD1_HUMAN	14_1	sp|Q9H4M9|EHD1_HUMAN	16.9516	NA	60588.7	DIQSLPR;ELVNNLGEIYQK;EPELFQTVAEGLR;LDISDEFSEVIK;LLDTVDDMLANDIAR	1;1;1;1;1	5	5	0.1105	2383;19166;20553;18627;23397	-	EH domain-containing protein 1 OS=Homo sapiens OX=9606 GN=EHD1 PE=1 SV=2	1519.88	46.0569
																CAPNS1	sp|P04632|CPNS1_HUMAN	271_1	sp|P04632|CPNS1_HUMAN	4.46749	NA	28297.7	SMVAVMDSDTTGK;YLWNNIK	1;1	2	2	0.0746	17381;5531	-	Calpain small subunit 1 OS=Homo sapiens OX=9606 GN=CAPNS1 PE=1 SV=1	493.528	35.252
																ABCE1	sp|P61221|ABCE1_HUMAN	372_1	sp|P61221|ABCE1_HUMAN	2.02446	NA	67271	DASLVFK	1	1	1	0.0117	1363	-	ATP-binding cassette sub-family E member 1 OS=Homo sapiens OX=9606 GN=ABCE1 PE=1 SV=1	1379.7	40.5795
																ATP1A1	sp|P05023|AT1A1_HUMAN	528_1	sp|P05023|AT1A1_HUMAN	2.9996	NA	112824	SPDFTNENPLETR	1	1	2	0.0127	21137;21134	-	Sodium/potassium-transporting ATPase subunit alpha-1 OS=Homo sapiens OX=9606 GN=ATP1A1 PE=1 SV=1	163.489	3.20566
																CAPN1	sp|P07384|CAN1_HUMAN	277_1	sp|P07384|CAN1_HUMAN	8.85516	NA	81838.2	APSDLYQIILK;YLGQDYEQLR	1;1	2	2	0.0294	15055;15781	-	Calpain-1 catalytic subunit OS=Homo sapiens OX=9606 GN=CAPN1 PE=1 SV=1	605.152	15.5167
																PON2	sp|Q15165|PON2_HUMAN	214_1	sp|Q15165|PON2_HUMAN	2.14949	NA	39356.3	FEEAENSLLHLK	1	1	1	0.0339	5613	-	Serum paraoxonase/arylesterase 2 OS=Homo sapiens OX=9606 GN=PON2 PE=1 SV=4	203.672	14.548
																VAT1	sp|Q99536|VAT1_HUMAN	49_1	sp|Q99536|VAT1_HUMAN	5.49057	NA	41893.4	GVDIVMDPLGGSDTAK;VLLVPGPEK	1;1	2	2	0.0636	22071;5574	-	Synaptic vesicle membrane protein VAT-1 homolog OS=Homo sapiens OX=9606 GN=VAT1 PE=1 SV=2	708.782	37.3043
																TMED10	sp|P49755|TMEDA_HUMAN	370_1	sp|P49755|TMEDA_HUMAN	4.42758	NA	24960	IPDQLVILDMK	1	1	1	0.0502	15801	-	Transmembrane emp24 domain-containing protein 10 OS=Homo sapiens OX=9606 GN=TMED10 PE=1 SV=2	276.5	21.2693
																SRSF2	sp|Q01130|SRSF2_HUMAN	375_1	sp|Q01130|SRSF2_HUMAN	4.42758	NA	25461.2	DAEDAMDAMDGAVLDGR	1	1	1	0.0769	24182	-	Serine/arginine-rich splicing factor 2 OS=Homo sapiens OX=9606 GN=SRSF2 PE=1 SV=4	75.616	6.87418
																MATR3	sp|P43243|MATR3_HUMAN	376_1	sp|P43243|MATR3_HUMAN	4.42758	NA	94564.8	VVHIMDFQR	1	1	1	0.0106	11352	-	Matrin-3 OS=Homo sapiens OX=9606 GN=MATR3 PE=1 SV=2	228.5	4.86169
																TLN1	sp|Q9Y490|TLN1_HUMAN	216_1	sp|Q9Y490|TLN1_HUMAN	6.48927	NA	269599	GLAGAVSELLR;VGDDPAVWQLK	1;1	2	2	0.0087	9495;13961	-	Talin-1 OS=Homo sapiens OX=9606 GN=TLN1 PE=1 SV=3	234.401	1.56267
																ASAP1	sp|Q9ULH1|ASAP1_HUMAN	302_1	sp|Q9ULH1|ASAP1_HUMAN	2.02446	NA	125420	GVDLLQNLIK	1	1	1	0.0089	10389	sp|O43150|ASAP2_HUMAN	Arf-GAP with SH3 domain, ANK repeat and PH domain-containing protein 1 OS=Homo sapiens OX=9606 GN=ASAP1 PE=1 SV=4	199.413	3.49848
																IDH2	sp|P48735|IDHP_HUMAN	231_1	sp|P48735|IDHP_HUMAN	13.2827	NA	50876.9	LDGNQDLIR;LIDDMVAQVLK;YFDLGLPNR	1;1;1	3	3	0.0642	8210;14539;9784	-	Isocitrate dehydrogenase [NADP], mitochondrial OS=Homo sapiens OX=9606 GN=IDH2 PE=1 SV=2	786.866	27.1333
																SF3B3	sp|Q15393|SF3B3_HUMAN	70_1	sp|Q15393|SF3B3_HUMAN	7.55225	NA	135492	IVILEYQPSK;SYYFPVK;TVLDPVTGDLSDTR	1;1;1	3	3	0.0255	12782;4242;20556	-	Splicing factor 3B subunit 3 OS=Homo sapiens OX=9606 GN=SF3B3 PE=1 SV=4	946.181	15.7697
																LGALS1	sp|P09382|LEG1_HUMAN	192_1	sp|P09382|LEG1_HUMAN	4.42758	NA	14706.2	LPDGYEFK	1	1	1	0.0593	5998	-	Galectin-1 OS=Homo sapiens OX=9606 GN=LGALS1 PE=1 SV=2	241.004	26.7783
																RO60	sp|P10155|RO60_HUMAN	485_1	sp|P10155|RO60_HUMAN	4.42758	NA	60631.2	LGLENAEALIR	1	1	1	0.0204	13063	-	60 kDa SS-A/Ro ribonucleoprotein OS=Homo sapiens OX=9606 GN=RO60 PE=1 SV=2	177.346	5.21606
																IQGAP1	sp|P46940|IQGA1_HUMAN	42_1	sp|P46940|IQGA1_HUMAN	16.0395	NA	189134	FDVPGDENAEMDAR;ILAIGLINEALDEGDAQK;NVIFEISPTEEVGDFEVK;QILAPVVK;TLINAEDPPMVVVR	1;1;1;1;1	5	6	0.0435	21909;25292;26335;26336;3385;21740	-	Ras GTPase-activating-like protein IQGAP1 OS=Homo sapiens OX=9606 GN=IQGAP1 PE=1 SV=1	1241.82	13.3529
																UQCRC1	sp|P31930|QCR1_HUMAN	10_1	sp|P31930|QCR1_HUMAN	2.88442	NA	52612.4	ADLTEYLSTHYK	1	1	1	0.025	19592	-	Cytochrome b-c1 complex subunit 1, mitochondrial OS=Homo sapiens OX=9606 GN=UQCRC1 PE=1 SV=3	120.657	4.82629
																RDX	sp|P35241|RADI_HUMAN	127_1	sp|P35241|RADI_HUMAN	2.88442	NA	68521.4	APDFVFYAPR;FFPEDVSEELIQEITQR;NISFNDK	0;1;0	1	1	0.0583	12538;12536;12537;26455;2604	-	Radixin OS=Homo sapiens OX=9606 GN=RDX PE=1 SV=1	9.53908	0.244592
																MSN	sp|P26038|MOES_HUMAN	127_2	sp|P26038|MOES_HUMAN	6.10836	NA	67777.8	APDFVFYAPR;EDAVLEYLK;FYPEDVSEELIQDITQR;NISFNDK	0;1;1;0	2	2	0.0745	12538;12536;12537;9315;26461;2604	-	Moesin OS=Homo sapiens OX=9606 GN=MSN PE=1 SV=3	218.33	5.45826
																KRT32	sp|Q14532|K1H2_HUMAN	16_1	sp|Q14532|K1H2_HUMAN	4.42758	NA	50310.2	LAADDFR;QLVEADINGLR	0;1	1	1	0.0402	1930;1929;1931;1932;13422	sp|O76013|KRT36_HUMAN	Keratin, type I cuticular Ha2 OS=Homo sapiens OX=9606 GN=KRT32 PE=2 SV=3	244.406	9.05208
																AHCYL1	sp|O43865|SAHH2_HUMAN	190_1	sp|O43865|SAHH2_HUMAN	6.11996	NA	58913.4	ESILDGLK;TPELTWER	1;1	2	3	0.0302	3545;3546;7857	sp|Q96HN2|SAHH3_HUMAN	S-adenosylhomocysteine hydrolase-like protein 1 OS=Homo sapiens OX=9606 GN=AHCYL1 PE=1 SV=2	395.367	11.6284
																BAG3	sp|O95817|BAG3_HUMAN	237_1	sp|O95817|BAG3_HUMAN	2.21929	NA	61556.9	ELLALDSVDPEGR	1	1	1	0.0226	19011	-	BAG family molecular chaperone regulator 3 OS=Homo sapiens OX=9606 GN=BAG3 PE=1 SV=3	217.105	6.78452
																RPL10	sp|P27635|RL10_HUMAN	483_1	sp|P27635|RL10_HUMAN	4.42758	NA	24587.9	FNADEFEDMVAEK	1	1	1	0.0607	21575	-	60S ribosomal protein L10 OS=Homo sapiens OX=9606 GN=RPL10 PE=1 SV=4	89.136	6.85662
																CS	sp|O75390|CISY_HUMAN	273_1	sp|O75390|CISY_HUMAN	8.85516	NA	51679.5	DILADLIPK;DYIWNTLNSGR	1;1	2	2	0.0429	6867;17314	-	Citrate synthase, mitochondrial OS=Homo sapiens OX=9606 GN=CS PE=1 SV=2	292.412	14.6206
																CAV1	sp|Q03135|CAV1_HUMAN	203_1	sp|Q03135|CAV1_HUMAN	6.11996	NA	20458.5	IDFEDVIAEPEGTHSFDGIWK;YVDSEGHLYTVPIR	1;1	2	2	0.1966	27571;23116	-	Caveolin-1 OS=Homo sapiens OX=9606 GN=CAV1 PE=1 SV=4	863.898	78.5362
																APMAP	sp|Q9HDC9|APMAP_HUMAN	393_1	sp|Q9HDC9|APMAP_HUMAN	8.85516	NA	46450.8	LENGEIETIAR;LLEYDTVTR	1;1	2	2	0.0481	14528;10275	-	Adipocyte plasma membrane-associated protein OS=Homo sapiens OX=9606 GN=APMAP PE=1 SV=2	441.281	19.1861
																XPO1	sp|O14980|XPO1_HUMAN	500_1	sp|O14980|XPO1_HUMAN	4.42758	NA	123306	EFAGEDTSDLFLEER	1	1	1	0.014	24251	-	Exportin-1 OS=Homo sapiens OX=9606 GN=XPO1 PE=1 SV=1	44.8892	0.773951
																GAPDHS	sp|O14556|G3PT_HUMAN	60_1	sp|O14556|G3PT_HUMAN	4.42758	NA	44472.8	AGIALNDNFVK;LTGMAFR	1;0	1	2	0.0441	11904;11905;1687	-	Glyceraldehyde-3-phosphate dehydrogenase, testis-specific OS=Homo sapiens OX=9606 GN=GAPDHS PE=1 SV=2	2074.55	94.2978
																FARSB	sp|Q9NSD9|SYFB_HUMAN	355_1	sp|Q9NSD9|SYFB_HUMAN	2.14949	NA	66073.5	TAEFQVAR	1	1	1	0.0136	4734	-	Phenylalanine--tRNA ligase beta subunit OS=Homo sapiens OX=9606 GN=FARSB PE=1 SV=3	603.877	13.4195
																NAA15	sp|Q9BXJ9|NAA15_HUMAN	502_1	sp|Q9BXJ9|NAA15_HUMAN	2.9996	NA	101208	SYVDLLK	1	1	1	0.0081	2634	-	N-alpha-acetyltransferase 15, NatA auxiliary subunit OS=Homo sapiens OX=9606 GN=NAA15 PE=1 SV=1	93.5525	1.50891
																CACYBP	sp|Q9HB71|CYBP_HUMAN	395_1	sp|Q9HB71|CYBP_HUMAN	13.6483	NA	26193.6	AELLDNEKPAAVVAPITTGYTVK;ISNYGWDQSDK;SFDLLVK;WDYLTQVEK	1;1;1;1	4	4	0.2193	27558;16592;2265;12504	-	Calcyclin-binding protein OS=Homo sapiens OX=9606 GN=CACYBP PE=1 SV=2	743.552	53.1109
																PICALM	sp|Q13492|PICAL_HUMAN	66_1	sp|Q13492|PICAL_HUMAN	2.02446	NA	70710	NTLFNLSNFLDK	1	1	1	0.0184	19300	sp|O60641|AP180_HUMAN	Phosphatidylinositol-binding clathrin assembly protein OS=Homo sapiens OX=9606 GN=PICALM PE=1 SV=2	47.6121	1.98384
																SAR1B	sp|Q9Y6B6|SAR1B_HUMAN	304_1	sp|Q9Y6B6|SAR1B_HUMAN	2.55024	NA	22395.5	LVFLGLDNAGK	1	1	1	0.0556	11428	sp|Q9NR31|SAR1A_HUMAN	GTP-binding protein SAR1b OS=Homo sapiens OX=9606 GN=SAR1B PE=1 SV=1	135.547	12.3225
																MYOF	sp|Q9NZM1|MYOF_HUMAN	351_1	sp|Q9NZM1|MYOF_HUMAN	11.3999	NA	234561	SIFSPVVK;SLLTEADAGHTEFTDEVYQNESR;VGETIIDLENR;WLLLNDPEDTSSGSK	1;1;1;1	4	4	0.0277	3617;27916;14994;23270	-	Myoferlin OS=Homo sapiens OX=9606 GN=MYOF PE=1 SV=1	535.971	4.12285
																SLC25A6	sp|P12236|ADT3_HUMAN	123_1	sp|P12236|ADT3_HUMAN	2.21929	NA	32845.2	AAYFGVYDTAK;EQGVLSFWR;TAVAPIER	1;0;0	1	1	0.094	13276;10641;3080	-	ADP/ATP translocase 3 OS=Homo sapiens OX=9606 GN=SLC25A6 PE=1 SV=4	880.1	40.0045
																MAT2A	sp|P31153|METK2_HUMAN	574_1	sp|P31153|METK2_HUMAN	6.58781	NA	43633.3	FVIGGPQGDAGLTGR;YLDEDTIYHLQPSGR	1;1	2	2	0.0759	19692;24695	-	S-adenosylmethionine synthase isoform type-2 OS=Homo sapiens OX=9606 GN=MAT2A PE=1 SV=1	629.462	29.9744
																TNPO1	sp|Q92973|TNPO1_HUMAN	541_1	sp|Q92973|TNPO1_HUMAN	4.42758	NA	102289	QSSFALLGDLTK	1	1	1	0.0134	15676	sp|O14787|TNPO2_HUMAN	Transportin-1 OS=Homo sapiens OX=9606 GN=TNPO1 PE=1 SV=2	269.416	7.0899
																RPN1	sp|P04843|RPN1_HUMAN	128_1	sp|P04843|RPN1_HUMAN	8.54943	NA	68526.8	LPVALDPGAK;NIEIDSPYEISR;VTAEVVLAHLGGGSTSR	1;1;1	3	4	0.0643	6366;19503;19504;23182	-	Dolichyl-diphosphooligosaccharide--protein glycosyltransferase subunit 1 OS=Homo sapiens OX=9606 GN=RPN1 PE=1 SV=1	768.002	19.2001
																GALK1	sp|P51570|GALK1_HUMAN	556_1	sp|P51570|GALK1_HUMAN	2.21929	NA	42245.6	EVQLEELEAAR	1	1	1	0.0281	15839	-	Galactokinase OS=Homo sapiens OX=9606 GN=GALK1 PE=1 SV=1	113.829	5.99098
																AARS1	sp|P49588|SYAC_HUMAN	448_1	sp|P49588|SYAC_HUMAN	34.1572	NA	106743	AVFDETYPDPVR;AVYTQDCPLAAAK;DIINEEEVQFLK;EADGILKPLPK;GAGGEDLIMLDIYAIEELR;GLVVDMDGFEEER;MALELLTQEFGIPIER;QIWQNLGLDDTK;VGAEDADGIDMAYR;VGDQVWLFIDEPR	1;1;1;1;1;1;1;1;1;1	10	12	0.1395	18911;18912;18896;20353;12488;26449;20678;25115;19406;20451;22053;22052	-	Alanine--tRNA ligase, cytoplasmic OS=Homo sapiens OX=9606 GN=AARS1 PE=1 SV=2	1982.97	35.4102
																CCDC6	sp|Q16204|CCDC6_HUMAN	491_1	sp|Q16204|CCDC6_HUMAN	2.55024	NA	53257.8	IDLENTLEQEQEALVNR	1	1	1	0.0359	17441	-	Coiled-coil domain-containing protein 6 OS=Homo sapiens OX=9606 GN=CCDC6 PE=1 SV=2	113.182	4.92095
																CEP128	sp|Q6ZU80|CE128_HUMAN	391_1	sp|Q6ZU80|CE128_HUMAN	2.49097	NA	127937	LSLLEDFK	1	1	1	0.0073	5914	-	Centrosomal protein of 128 kDa OS=Homo sapiens OX=9606 GN=CEP128 PE=1 SV=2	300.5	3.75625
																KIF2A	sp|O00139|KIF2A_HUMAN	89_1	sp|O00139|KIF2A_HUMAN	2.9996	NA	79904.6	FSLIDLAGNER	1	1	1	0.0156	14181	-	Kinesin-like protein KIF2A OS=Homo sapiens OX=9606 GN=KIF2A PE=1 SV=3	98.6302	2.29372
																TPR	sp|P12270|TPR_HUMAN	554_1	sp|P12270|TPR_HUMAN	2.67772	NA	267131	SQEQILEILR	1	1	1	0.0042	14009	-	Nucleoprotein TPR OS=Homo sapiens OX=9606 GN=TPR PE=1 SV=3	144.078	1.02913
																PPP1CA	sp|P62136|PP1A_HUMAN	62_1	sp|P62136|PP1A_HUMAN	13.2827	NA	37487.8	AHQVVEDGYEFFAK;EIFLSQPILLELEAPLK;LNLDSIIGR	1;1;1	3	3	0.1212	22993;25762;6944	-	Serine/threonine-protein phosphatase PP1-alpha catalytic subunit OS=Homo sapiens OX=9606 GN=PPP1CA PE=1 SV=1	994.817	52.3588
																GART	sp|P22102|PUR2_HUMAN	274_1	sp|P22102|PUR2_HUMAN	8.85516	NA	107699	ENLISALEEAK;VDLGGFAGLFDLK	1;1	2	2	0.0238	13649;17652	-	Trifunctional purine biosynthetic protein adenosine-3 OS=Homo sapiens OX=9606 GN=GART PE=1 SV=1	198.332	3.54165
																PPA1	sp|Q15181|IPYR_HUMAN	545_1	sp|Q15181|IPYR_HUMAN	17.1874	NA	32639.2	AAPFSLEYR;DKDFAIDIIK;DPLNPIK;VIAINVDDPDAANYNDINDVK;VLGILAMIDEGETDWK	1;1;1;1;1	5	6	0.218	8526;12398;1715;1716;27291;24554	-	Inorganic pyrophosphatase OS=Homo sapiens OX=9606 GN=PPA1 PE=1 SV=2	869.68	43.484
																S100A9	sp|P06702|S10A9_HUMAN	506_1	sp|P06702|S10A9_HUMAN	2.67772	NA	13233.5	NIETIINTFHQYSVK	1	1	1	0.1316	24698	-	Protein S100-A9 OS=Homo sapiens OX=9606 GN=S100A9 PE=1 SV=1	122.22	15.2775
																ACP1	sp|P24666|PPAC_HUMAN	444_1	sp|P24666|PPAC_HUMAN	2.26421	NA	18030.8	LVTDQNISENWR	1	1	1	0.0759	20281	-	Low molecular weight phosphotyrosine protein phosphatase OS=Homo sapiens OX=9606 GN=ACP1 PE=1 SV=3	241.027	24.1027
																KPNA4	sp|O00629|IMA3_HUMAN	82_1	sp|O00629|IMA3_HUMAN	2.06169	NA	57850.6	NPPIDDLIK	1	1	1	0.0173	7635	sp|O00505|IMA4_HUMAN	Importin subunit alpha-3 OS=Homo sapiens OX=9606 GN=KPNA4 PE=1 SV=1	234.667	12.3509
																NME1	sp|P15531|NDKA_HUMAN	250_1	sp|P15531|NDKA_HUMAN	8.85516	NA	17137.7	FMQASEDLLK;TFIAIKPDGVQR	1;1	2	2	0.1447	12511;17479	-	Nucleoside diphosphate kinase A OS=Homo sapiens OX=9606 GN=NME1 PE=1 SV=1	967.918	87.9925
																HSD17B4	sp|P51659|DHB4_HUMAN	84_1	sp|P51659|DHB4_HUMAN	2.06169	NA	79636.3	GALVVVNDLGGDFK	1	1	1	0.019	18801	-	Peroxisomal multifunctional enzyme type 2 OS=Homo sapiens OX=9606 GN=HSD17B4 PE=1 SV=3	126.01	2.93046
																HSPE1	sp|P61604|CH10_HUMAN	353_1	sp|P61604|CH10_HUMAN	2.11164	NA	10924.9	FLPLFDR	1	1	1	0.0686	4366	-	10 kDa heat shock protein, mitochondrial OS=Homo sapiens OX=9606 GN=HSPE1 PE=1 SV=2	115.311	11.5311
																GNB1	sp|P62873|GBB1_HUMAN	252_1	sp|P62873|GBB1_HUMAN	2.38155	NA	37353	LIIWDSYTTNK	1	1	1	0.0324	17711	sp|Q9HAV0|GBB4_HUMAN;sp|P62879|GBB2_HUMAN	Guanine nucleotide-binding protein G(I)/G(S)/G(T) subunit beta-1 OS=Homo sapiens OX=9606 GN=GNB1 PE=1 SV=3	306.358	23.566
																LONP1	sp|P36776|LONM_HUMAN	446_1	sp|P36776|LONM_HUMAN	5.0639	NA	106422	DIIALNPLYR;TENPLILIDEVDK	1;1	2	2	0.024	12728;20752	-	Lon protease homolog, mitochondrial OS=Homo sapiens OX=9606 GN=LONP1 PE=1 SV=2	314.765	6.17187
																SLC1A5	sp|Q15758|AAAT_HUMAN	369_1	sp|Q15758|AAAT_HUMAN	5.04187	NA	56562.3	IVEMEDVGLLFAR;STEPELIQVK	1;1	2	2	0.0425	20619;11318	-	Neutral amino acid transporter B(0) OS=Homo sapiens OX=9606 GN=SLC1A5 PE=1 SV=2	396.726	23.3368
																ASPM	sp|Q8IZT6|ASPM_HUMAN	256_1	sp|Q8IZT6|ASPM_HUMAN	2.18838	NA	409540	EEIAFLK	1	1	1	0.002	2935	-	Abnormal spindle-like microcephaly-associated protein OS=Homo sapiens OX=9606 GN=ASPM PE=1 SV=2	274.439	1.2418
																BUB3	sp|O43684|BUB3_HUMAN	464_1	sp|O43684|BUB3_HUMAN	2.46333	NA	37131.2	VAVEYLDPSPEVQK	1	1	1	0.0427	22057	-	Mitotic checkpoint protein BUB3 OS=Homo sapiens OX=9606 GN=BUB3 PE=1 SV=1	205.142	12.8214
																ILK	sp|Q13418|ILK_HUMAN	109_1	sp|Q13418|ILK_HUMAN	2.51031	NA	51385.9	FDMIVPILEK	1	1	1	0.0221	13260	-	Integrin-linked protein kinase OS=Homo sapiens OX=9606 GN=ILK PE=1 SV=2	139.406	5.16318
																NUDT5	sp|Q9UKK9|NUDT5_HUMAN	475_1	sp|Q9UKK9|NUDT5_HUMAN	5.57814	NA	24312.2	EQTADGVAVIPVLQR;QYIISEELISEGK	1;1	2	2	0.1279	22408;20929	-	ADP-sugar pyrophosphatase OS=Homo sapiens OX=9606 GN=NUDT5 PE=1 SV=1	318.98	26.5817
																HSD17B12	sp|Q53GQ0|DHB12_HUMAN	547_1	sp|Q53GQ0|DHB12_HUMAN	4.42758	NA	34302.2	TIAVDFASEDIYDK	1	1	1	0.0449	22238	-	Very-long-chain 3-oxoacyl-CoA reductase OS=Homo sapiens OX=9606 GN=HSD17B12 PE=1 SV=2	211.391	13.212
																FARP1	sp|Q9Y4F1|FARP1_HUMAN	100_1	sp|Q9Y4F1|FARP1_HUMAN	2.55024	NA	118559	DLIGIDNLVVPGR	1	1	1	0.0124	18316	-	FERM, ARHGEF and pleckstrin domain-containing protein 1 OS=Homo sapiens OX=9606 GN=FARP1 PE=1 SV=1	72.1891	1.20315
																GPD2	sp|P43304|GPDM_HUMAN	377_1	sp|P43304|GPDM_HUMAN	2.9996	NA	80801.6	SEISLLPSDIDR	1	1	1	0.0165	17466	-	Glycerol-3-phosphate dehydrogenase, mitochondrial OS=Homo sapiens OX=9606 GN=GPD2 PE=1 SV=3	496.328	10.5602
																KRT6C	sp|P48668|K2C6C_HUMAN	8_4	sp|P48668|K2C6C_HUMAN	6.91855	NA	59988.3	ADTLTDEINFLR;AEAESWYQTK;AIGGGLSSVGGGSSTIK;AQYEEIAQR;ISIGGGSCAISGGYGSR;LALDVEIATYR;LEGLEDALQK;NKYEDEINK;NLDLDSIIAEVK;NMQDLVEDLK;QLDSIVGER;QNLEPLFEQYINNLR;SGFSSISVSR;SLYGLGGSK;TAAENEFVTLK;WTLLQEQGTK;YEELQVTAGR	0;0;0;0;0;0;0;0;0;1;0;0;1;0;0;0;0	2	2	0.3387	18903;13477;19774;19775;10171;10183;22437;15173;15170;15172;15169;15171;10435;11594;17087;17086;13243;7404;25222;25345;25346;7690;3726;13845;13222;13221;12006;12010;12011	-	Keratin, type II cytoskeletal 6C OS=Homo sapiens OX=9606 GN=KRT6C PE=1 SV=3	1286.31	35.7308
																SH3KBP1	sp|Q96B97|SH3K1_HUMAN	396_1	sp|Q96B97|SH3K1_HUMAN	2.38155	NA	73081.7	IDLAGSSLSGILDK	1	1	1	0.0211	18504	-	SH3 domain-containing kinase-binding protein 1 OS=Homo sapiens OX=9606 GN=SH3KBP1 PE=1 SV=2	15.6812	0.39203
																RUVBL2	sp|Q9Y230|RUVB2_HUMAN	550_1	sp|Q9Y230|RUVB2_HUMAN	9.97742	NA	51124.6	AVLIAGQPGTGK;LLIVSTTPYSEK;TTEMETIYDLGTK	1;1;1	3	3	0.0799	10330;17626;20803	-	RuvB-like 2 OS=Homo sapiens OX=9606 GN=RUVBL2 PE=1 SV=3	840.617	30.022
																HLA-A	sp|P04439|HLAA_HUMAN	104_1	sp|P04439|HLAA_HUMAN	4.42758	NA	40815.2	FIAVGYVDDTQFVR	1	1	1	0.0384	22860	-	HLA class I histocompatibility antigen, A alpha chain OS=Homo sapiens OX=9606 GN=HLA-A PE=1 SV=2	168.021	8.00099
																TMEM43	sp|Q9BTV4|TMM43_HUMAN	525_1	sp|Q9BTV4|TMM43_HUMAN	3.12037	NA	44847.2	LEDPHVDIIR	1	1	1	0.025	13324	-	Transmembrane protein 43 OS=Homo sapiens OX=9606 GN=TMEM43 PE=1 SV=1	332.851	15.1296
																UGP2	sp|Q16851|UGPA_HUMAN	398_1	sp|Q16851|UGPA_HUMAN	6.79057	NA	56904.7	LVEIAQVPK;NENTFLDLTVQQIEHLNK	1;1	2	2	0.0531	6845;26812	-	UTP--glucose-1-phosphate uridylyltransferase OS=Homo sapiens OX=9606 GN=UGP2 PE=1 SV=5	160.662	5.18265
																PGM1	sp|P36871|PGM1_HUMAN	106_1	sp|P36871|PGM1_HUMAN	2.06169	NA	61410.5	VDLGVLGK	1	1	1	0.0142	1792	-	Phosphoglucomutase-1 OS=Homo sapiens OX=9606 GN=PGM1 PE=1 SV=3	368.541	9.96057
																IGHA1	sp|P01876|IGHA1_HUMAN	65_1	sp|P01876|IGHA1_HUMAN	4.42758	NA	37630.6	TPLTATLSK	1	1	1	0.0255	5027	-	Immunoglobulin heavy constant alpha 1 OS=Homo sapiens OX=9606 GN=IGHA1 PE=1 SV=2	974.631	64.9754
																RAB35	sp|Q15286|RAB35_HUMAN	236_1	sp|Q15286|RAB35_HUMAN	4.42758	NA	23010.8	LLIIGDSGVGK	1	1	1	0.0547	9054	-	Ras-related protein Rab-35 OS=Homo sapiens OX=9606 GN=RAB35 PE=1 SV=1	400.157	26.6771
																RAB10	sp|P61026|RAB10_HUMAN	287_1	sp|P61026|RAB10_HUMAN	4.42758	NA	22526.6	AFLTLAEDILR	1	1	1	0.055	15105	-	Ras-related protein Rab-10 OS=Homo sapiens OX=9606 GN=RAB10 PE=1 SV=1	23.5954	1.38796
																PPL	sp|O60437|PEPL_HUMAN	141_1	sp|O60437|PEPL_HUMAN	2.08714	NA	204623	NLLDEIASR	1	1	1	0.0051	7842	-	Periplakin OS=Homo sapiens OX=9606 GN=PPL PE=1 SV=4	113.313	0.839353
																EIF3C	sp|Q99613|EIF3C_HUMAN	479_1	sp|Q99613|EIF3C_HUMAN	6.86187	NA	105278	ELLGQGLLLR;GCILTLVER	1;1	2	2	0.0208	10331;8750	sp|B5ME19|EIFCL_HUMAN	Eukaryotic translation initiation factor 3 subunit C OS=Homo sapiens OX=9606 GN=EIF3C PE=1 SV=1	304.121	6.91183
																EPHX1	sp|P07099|HYEP_HUMAN	19_1	sp|P07099|HYEP_HUMAN	2.02446	NA	52915	DVELLYPVK	1	1	1	0.0198	9195	-	Epoxide hydrolase 1 OS=Homo sapiens OX=9606 GN=EPHX1 PE=1 SV=1	247.385	10.3077
																CALU	sp|O43852|CALU_HUMAN	234_1	sp|O43852|CALU_HUMAN	6.87692	NA	37083.5	DIVVQETMEDIDK;DWILPSDYDHAEAEAR;EQFVEFR	1;1;1	3	3	0.1143	21406;25317;5626	-	Calumenin OS=Homo sapiens OX=9606 GN=CALU PE=1 SV=2	656.754	38.6326
																BROX	sp|Q5VW32|BROX_HUMAN	306_1	sp|Q5VW32|BROX_HUMAN	2.9996	NA	46446.6	IPTEAPQLELK	1	1	1	0.0268	14332	-	BRO1 domain-containing protein BROX OS=Homo sapiens OX=9606 GN=BROX PE=1 SV=1	84.5606	3.38242
																CAND1	sp|Q86VP6|CAND1_HUMAN	373_1	sp|Q86VP6|CAND1_HUMAN	4.41284	NA	136289	EYCIQAFESFVR;TLEDPDLNVR	1;1	2	2	0.0179	21643;12170	-	Cullin-associated NEDD8-dissociated protein 1 OS=Homo sapiens OX=9606 GN=CAND1 PE=1 SV=2	387.477	5.87087
																VTN	sp|P04004|VTNC_HUMAN	215_1	sp|P04004|VTNC_HUMAN	2.36299	NA	54271.2	DVWGIEGPIDAAFTR	1	1	1	0.0314	23087	-	Vitronectin OS=Homo sapiens OX=9606 GN=VTN PE=1 SV=1	10.1976	0.463526
																CCT4	sp|P50991|TCPD_HUMAN	460_1	sp|P50991|TCPD_HUMAN	5.0728	NA	57887.8	DALSDLALHFLNK;GDVTITNDGATILK	1;1	2	2	0.0501	19922;19118	-	T-complex protein 1 subunit delta OS=Homo sapiens OX=9606 GN=CCT4 PE=1 SV=4	304.555	8.23122
																NCEH1	sp|Q6PIU2|NCEH1_HUMAN	232_1	sp|Q6PIU2|NCEH1_HUMAN	2.49097	NA	45778.7	VYFPEQIHDVVR	1	1	1	0.0294	6975	-	Neutral cholesterol ester hydrolase 1 OS=Homo sapiens OX=9606 GN=NCEH1 PE=1 SV=3	160.421	7.29186
																TPT1	sp|P13693|TCTP_HUMAN	371_1	sp|P13693|TCTP_HUMAN	2.06169	NA	19582.6	DLISHDEMFSDIYK	1	1	1	0.0814	23812	-	Translationally-controlled tumor protein OS=Homo sapiens OX=9606 GN=TPT1 PE=1 SV=1	67.3493	8.41866
																MVP	sp|Q14764|MVP_HUMAN	217_1	sp|Q14764|MVP_HUMAN	13.0776	NA	99265.9	ALLDFEDK;ELELVYAR;TAVFGFETSEAK;VVAGDEWLFEGPGTYIPR	1;1;1;1	4	4	0.0515	5519;6736;15834;26087	-	Major vault protein OS=Homo sapiens OX=9606 GN=MVP PE=1 SV=4	754.358	15.3951
																SRSF7	sp|Q16629|SRSF7_HUMAN	38_1	sp|Q16629|SRSF7_HUMAN	11.9755	NA	27350	AFSYYGPLR;VELSTGMPR;VYVGNLGTGAGK	1;1;1	3	4	0.1261	9101;6644;6643;11089	-	Serine/arginine-rich splicing factor 7 OS=Homo sapiens OX=9606 GN=SRSF7 PE=1 SV=1	1798.12	112.383
																SUCLG2	sp|Q96I99|SUCB2_HUMAN	219_1	sp|Q96I99|SUCB2_HUMAN	4.42758	NA	46481.4	INFDDNAEFR	1	1	1	0.0231	14365	-	Succinate--CoA ligase [GDP-forming] subunit beta, mitochondrial OS=Homo sapiens OX=9606 GN=SUCLG2 PE=1 SV=2	332.197	11.0732
																FUBP1	sp|Q96AE4|FUBP1_HUMAN	480_1	sp|Q96AE4|FUBP1_HUMAN	2.28287	NA	67518.5	TGLIIGK	1	1	1	0.0109	60	-	Far upstream element-binding protein 1 OS=Homo sapiens OX=9606 GN=FUBP1 PE=1 SV=3	665.75	18.493
																NSFL1C	sp|Q9UNZ2|NSF1C_HUMAN	417_1	sp|Q9UNZ2|NSF1C_HUMAN	7.42718	NA	40548.3	EANLLNAVIVQR;LGAAPEEESAYVAGEK	1;1	2	2	0.0757	17339;22738	-	NSFL1 cofactor p47 OS=Homo sapiens OX=9606 GN=NSFL1C PE=1 SV=2	606.402	26.3653
																MCCC1	sp|Q96RQ3|MCCA_HUMAN	419_1	sp|Q96RQ3|MCCA_HUMAN	22.1379	NA	80421.9	EGSIEIDIPVPK;ESLCQAALGLILK;IIEEAPAPGIK;QEGIIFIGPPPSAIR;SEQEFQEQLESAR	1;1;1;1;1	5	5	0.0883	16163;19078;11164;22388;22156	-	Methylcrotonoyl-CoA carboxylase subunit alpha, mitochondrial OS=Homo sapiens OX=9606 GN=MCCC1 PE=1 SV=3	1248.15	28.3671
																EIF3H	sp|O15372|EIF3H_HUMAN	283_1	sp|O15372|EIF3H_HUMAN	2.43429	NA	39905.1	GEPPLPEEDLSK	1	1	1	0.0341	16557	-	Eukaryotic translation initiation factor 3 subunit H OS=Homo sapiens OX=9606 GN=EIF3H PE=1 SV=1	570.232	23.7597
																SULT1A1	sp|P50225|ST1A1_HUMAN	160_1	sp|P50225|ST1A1_HUMAN	4.42758	NA	34143.2	VPFLEFK	1	1	1	0.0237	3684	sp|P50226|ST1A2_HUMAN	Sulfotransferase 1A1 OS=Homo sapiens OX=9606 GN=SULT1A1 PE=1 SV=3	162.927	7.75845
																IGKC	sp|P01834|IGKC_HUMAN	238_1	sp|P01834|IGKC_HUMAN	2.28287	NA	11757.8	TVAAPSVFIFPPSDEQLK	1	1	1	0.1682	25716	-	Immunoglobulin kappa constant OS=Homo sapiens OX=9606 GN=IGKC PE=1 SV=2	59.0533	11.8107
																GSPT1	sp|P15170|ERF3A_HUMAN	482_1	sp|P15170|ERF3A_HUMAN	4.94548	NA	55720.3	MDDPTVNWSNER;TFDAQIVIIEHK	1;1	2	2	0.0481	20064;19015	-	Eukaryotic peptide chain release factor GTP-binding subunit ERF3A OS=Homo sapiens OX=9606 GN=GSPT1 PE=1 SV=1	363.641	12.5394
																NBAS	sp|A2RRP1|NBAS_HUMAN	509_1	sp|A2RRP1|NBAS_HUMAN	2.02446	NA	268401	VLSGSPYYK	1	1	1	0.0038	7318	-	Neuroblastoma-amplified sequence OS=Homo sapiens OX=9606 GN=NBAS PE=1 SV=2	343.305	2.66128
																SNRNP200	sp|O75643|U520_HUMAN	281_1	sp|O75643|U520_HUMAN	2.9996	NA	244353	DIDAFWLQR	1	1	1	0.0042	11935	-	U5 small nuclear ribonucleoprotein 200 kDa helicase OS=Homo sapiens OX=9606 GN=SNRNP200 PE=1 SV=2	60.8163	0.498494
																DNM2	sp|P50570|DYN2_HUMAN	147_1	sp|P50570|DYN2_HUMAN	5.21888	NA	98003.2	GYIGVVNR;LDLMDEGTDAR	1;1	2	2	0.0218	3632;14196	sp|Q05193|DYN1_HUMAN	Dynamin-2 OS=Homo sapiens OX=9606 GN=DNM2 PE=1 SV=2	1005.19	17.9499
																HSPA4L	sp|O95757|HS74L_HUMAN	411_1	sp|O95757|HS74L_HUMAN	2.49097	NA	94452.5	DISTTLNADEAVAR;EDISSIEIVGGATR	0;1	1	1	0.0334	20302;19738	-	Heat shock 70 kDa protein 4L OS=Homo sapiens OX=9606 GN=HSPA4L PE=1 SV=3	0	0
																TPM4	sp|P67936|TPM4_HUMAN	149_1	sp|P67936|TPM4_HUMAN	2.79599	NA	28504.5	IQLVEEELDR;LVILEGELER	0;1	1	1	0.0806	14475;14474;12152	sp|P07951|TPM2_HUMAN	Tropomyosin alpha-4 chain OS=Homo sapiens OX=9606 GN=TPM4 PE=1 SV=3	307.717	14.6532
																TPM3	sp|P06753|TPM3_HUMAN	149_2	sp|P06753|TPM3_HUMAN	7.42718	NA	32929.8	AADAEAEVASLNR;IQLVEEELDR;LVIIEGDLER	1;0;1	2	2	0.1158	16711;14475;14474;11732	-	Tropomyosin alpha-3 chain OS=Homo sapiens OX=9606 GN=TPM3 PE=1 SV=2	435.369	18.1404
																ANP32A	sp|P39687|AN32A_HUMAN	37_2	sp|P39687|AN32A_HUMAN	2.9996	NA	28568.3	ELVLDNSR;SLDLFNCEVTNLNDYR	1;0	1	1	0.0964	5372;25896	-	Acidic leucine-rich nuclear phosphoprotein 32 family member A OS=Homo sapiens OX=9606 GN=ANP32A PE=1 SV=1	878.225	79.8386
																ANP32B	sp|Q92688|AN32B_HUMAN	37_1	sp|Q92688|AN32B_HUMAN	4.42758	NA	28770.3	IFGGLDMLAEK;SLDLFNCEVTNLNDYR	1;0	1	1	0.1076	12919;25896	-	Acidic leucine-rich nuclear phosphoprotein 32 family member B OS=Homo sapiens OX=9606 GN=ANP32B PE=1 SV=1	115.215	10.4741
																ANP32E	sp|Q9BTT0|AN32E_HUMAN	503_1	sp|Q9BTT0|AN32E_HUMAN	2.4058	NA	30673.8	INLELR	1	1	1	0.0224	962	-	Acidic leucine-rich nuclear phosphoprotein 32 family member E OS=Homo sapiens OX=9606 GN=ANP32E PE=1 SV=1	370.89	37.089
																ATP2A2	sp|P16615|AT2A2_HUMAN	107_1	sp|P16615|AT2A2_HUMAN	18.4707	NA	114683	DIVPGDIVEIAVGDK;EFTLEFSR;IGIFGQDEDVTSK;TASEMVLADDNFSTIVAAVEEGR;VGEATETALTCLVEK	1;1;1;1;1	5	5	0.071	21497;7742;18916;27605;22743	-	Sarcoplasmic/endoplasmic reticulum calcium ATPase 2 OS=Homo sapiens OX=9606 GN=ATP2A2 PE=1 SV=1	549.685	10.5709
																ATP5F1C	sp|P36542|ATPG_HUMAN	441_1	sp|P36542|ATPG_HUMAN	2.55024	NA	32975.3	EVMLVGIGDK	1	1	1	0.0336	8749	-	ATP synthase subunit gamma, mitochondrial OS=Homo sapiens OX=9606 GN=ATP5F1C PE=1 SV=1	458.086	26.9462
																TXNDC5	sp|Q8NBS9|TXND5_HUMAN	439_1	sp|Q8NBS9|TXND5_HUMAN	2.9996	NA	47598.7	TLAPTWEELSK	1	1	1	0.0255	15510	-	Thioredoxin domain-containing protein 5 OS=Homo sapiens OX=9606 GN=TXNDC5 PE=1 SV=2	393.208	15.7283
																SARS1	sp|P49591|SYSC_HUMAN	129_1	sp|P49591|SYSC_HUMAN	4.42758	NA	58740	VLDLDLFR	1	1	1	0.0156	6694	-	Serine--tRNA ligase, cytoplasmic OS=Homo sapiens OX=9606 GN=SARS1 PE=1 SV=3	230.09	7.66965
																IMPDH2	sp|P12268|IMDH2_HUMAN	505_1	sp|P12268|IMDH2_HUMAN	8.91595	NA	55769.6	LPIVNEDDELVAIIAR;NLIDAGVDALR;YEQGFITDPVVLSPK	1;1;1	3	3	0.0817	24451;11720;23618	-	Inosine-5'-monophosphate dehydrogenase 2 OS=Homo sapiens OX=9606 GN=IMPDH2 PE=1 SV=2	401.533	16.0613
																CBR1	sp|P16152|CBR1_HUMAN	433_1	sp|P16152|CBR1_HUMAN	4.73941	NA	30355.9	GIGLAIVR;IGVTVLSR	1;1	2	2	0.0578	1754;2823	-	Carbonyl reductase [NADPH] 1 OS=Homo sapiens OX=9606 GN=CBR1 PE=1 SV=3	557.325	30.9625
																FAM49B	sp|Q9NUQ9|FA49B_HUMAN	7_1	sp|Q9NUQ9|FA49B_HUMAN	6.97782	NA	36724.6	DAEGILEDLQSYR;VMLETPEYR	1;1	2	2	0.0679	20923;11139	-	Protein FAM49B OS=Homo sapiens OX=9606 GN=FAM49B PE=1 SV=1	1692.24	73.5757
																ALDH9A1	sp|P49189|AL9A1_HUMAN	264_1	sp|P49189|AL9A1_HUMAN	4.42758	NA	53767	IGDPLLEDTR	1	1	1	0.0202	10866	-	4-trimethylaminobutyraldehyde dehydrogenase OS=Homo sapiens OX=9606 GN=ALDH9A1 PE=1 SV=3	96.3855	3.70713
																ITGB4	sp|P16144|ITB4_HUMAN	224_1	sp|P16144|ITB4_HUMAN	7.1053	NA	202039	LLELQEVDSLLR;QEVEENLNEVYR	1;1	2	2	0.0132	19342;21168	-	Integrin beta-4 OS=Homo sapiens OX=9606 GN=ITGB4 PE=1 SV=5	241.258	2.31979
																TARS1	sp|P26639|SYTC_HUMAN	18_1	sp|P26639|SYTC_HUMAN	11.0435	NA	83381.9	AELNPWPEYIYTR;FLGDIEVWDQAEK;WELNSGDGAFYGPK	1;1;1	3	3	0.0553	23145;21661;21509	-	Threonine--tRNA ligase 1, cytoplasmic OS=Homo sapiens OX=9606 GN=TARS1 PE=1 SV=3	387.138	8.23699
																VPS35	sp|Q96QK1|VPS35_HUMAN	487_1	sp|Q96QK1|VPS35_HUMAN	2.67772	NA	91648.9	LLDEAIQAVK	1	1	1	0.0126	9960	-	Vacuolar protein sorting-associated protein 35 OS=Homo sapiens OX=9606 GN=VPS35 PE=1 SV=2	538.705	11.223
																HADH	sp|Q16836|HCDH_HUMAN	390_1	sp|Q16836|HCDH_HUMAN	2.30222	NA	34271.9	TFESLVDFSK	1	1	1	0.0318	12209	-	Hydroxyacyl-coenzyme A dehydrogenase, mitochondrial OS=Homo sapiens OX=9606 GN=HADH PE=1 SV=3	209.987	11.0519
																RAB14	sp|P61106|RAB14_HUMAN	570_1	sp|P61106|RAB14_HUMAN	4.42758	NA	23881.9	TGENVEDAFLEAAK	1	1	1	0.0651	20651	-	Ras-related protein Rab-14 OS=Homo sapiens OX=9606 GN=RAB14 PE=1 SV=4	90.7785	6.0519
																HSPBP1	sp|Q9NZL4|HPBP1_HUMAN	81_1	sp|Q9NZL4|HPBP1_HUMAN	2.9996	NA	39277.5	EPELGLEELLR	1	1	1	0.0306	16188	-	Hsp70-binding protein 1 OS=Homo sapiens OX=9606 GN=HSPBP1 PE=1 SV=2	119.271	6.62615
																LAMP2	sp|P13473|LAMP2_HUMAN	470_1	sp|P13473|LAMP2_HUMAN	2.36299	NA	44932.3	IPLNDLFR	1	1	1	0.0195	6583	-	Lysosome-associated membrane glycoprotein 2 OS=Homo sapiens OX=9606 GN=LAMP2 PE=1 SV=2	155.11	8.16369
																CD63	sp|P08962|CD63_HUMAN	239_1	sp|P08962|CD63_HUMAN	4.42758	NA	25619.1	VMSEFNNNFR	1	1	1	0.042	14939	-	CD63 antigen OS=Homo sapiens OX=9606 GN=CD63 PE=1 SV=2	211.072	17.5893
																RPL31	sp|P62899|RL31_HUMAN	445_1	sp|P62899|RL31_HUMAN	2.62779	NA	14453.9	SAINEVVTR	1	1	1	0.072	6615	-	60S ribosomal protein L31 OS=Homo sapiens OX=9606 GN=RPL31 PE=1 SV=1	1250.44	178.634
																ITGAV	sp|P06756|ITAV_HUMAN	447_1	sp|P06756|ITAV_HUMAN	4.42758	NA	115964	MFLLVGAPK	1	1	1	0.0086	6221	-	Integrin alpha-V OS=Homo sapiens OX=9606 GN=ITGAV PE=1 SV=2	185.673	2.8565
																GFM2	sp|Q969S9|RRF2M_HUMAN	125_1	sp|Q969S9|RRF2M_HUMAN	4.42758	NA	86546.1	VNLIDTPGHVDFTLEVER	1	1	1	0.0231	18075	-	Ribosome-releasing factor 2, mitochondrial OS=Homo sapiens OX=9606 GN=GFM2 PE=1 SV=1	123.954	2.88265
																TFAP2D	sp|Q7Z6R9|AP2D_HUMAN	472_1	sp|Q7Z6R9|AP2D_HUMAN	2.36299	NA	49546.9	VTIAEVK	1	1	2	0.0155	1013;1012	-	Transcription factor AP-2-delta OS=Homo sapiens OX=9606 GN=TFAP2D PE=2 SV=1	643.653	33.8765
																AZGP1	sp|P25311|ZA2G_HUMAN	437_1	sp|P25311|ZA2G_HUMAN	3.38619	NA	34237.1	AGEVQEPELR	1	1	1	0.0336	10831	-	Zinc-alpha-2-glycoprotein OS=Homo sapiens OX=9606 GN=AZGP1 PE=1 SV=2	228.763	12.0402
																SERPINB6	sp|P35237|SPB6_HUMAN	85_1	sp|P35237|SPB6_HUMAN	6.91855	NA	42594.1	ELNMIIMLPDETTDLR;TGTQYLLR	1;1	2	2	0.0638	25434;5569	-	Serpin B6 OS=Homo sapiens OX=9606 GN=SERPINB6 PE=1 SV=3	638.182	26.5909
																FKBP10	sp|Q96AY3|FKB10_HUMAN	450_1	sp|Q96AY3|FKB10_HUMAN	2.21929	NA	64204.2	ASPAGGPLEDVVIER	1	1	1	0.0258	20946	-	Peptidyl-prolyl cis-trans isomerase FKBP10 OS=Homo sapiens OX=9606 GN=FKBP10 PE=1 SV=1	180.442	5.15549
																SERPINA1	sp|P01009|A1AT_HUMAN	87_1	sp|P01009|A1AT_HUMAN	11.8548	NA	46707	ITPNLAEFAFSLYR;SVLGQLGITK;VFSNGADLSGVTEEAPLKLSK	1;1;1	3	3	0.1077	23029;7395;19625	-	Alpha-1-antitrypsin OS=Homo sapiens OX=9606 GN=SERPINA1 PE=1 SV=3	744.766	29.7906
																ESD	sp|P10768|ESTD_HUMAN	474_1	sp|P10768|ESTD_HUMAN	4.91066	NA	31442.5	FAVYLPPK;IPVVFR	1;1	2	2	0.0496	5119;517	-	S-formylglutathione hydrolase OS=Homo sapiens OX=9606 GN=ESD PE=1 SV=2	739.488	46.218
																MCM6	sp|Q14566|MCM6_HUMAN	481_1	sp|Q14566|MCM6_HUMAN	4.42758	NA	92831.2	VSGVDGYETEGIR	1	1	1	0.0158	18332	-	DNA replication licensing factor MCM6 OS=Homo sapiens OX=9606 GN=MCM6 PE=1 SV=1	248.729	4.36367
																RPL35A	sp|P18077|RL35A_HUMAN	244_1	sp|P18077|RL35A_HUMAN	4.42758	NA	12529.8	DETEFYLGK	1	1	1	0.0818	9997	-	60S ribosomal protein L35a OS=Homo sapiens OX=9606 GN=RPL35A PE=1 SV=2	269.486	29.9429
																LRRFIP1	sp|Q32MZ4|LRRF1_HUMAN	320_1	sp|Q32MZ4|LRRF1_HUMAN	2.9996	NA	89198.7	ELTYQNTDLSEIK	1	1	1	0.0161	21734	-	Leucine-rich repeat flightless-interacting protein 1 OS=Homo sapiens OX=9606 GN=LRRFIP1 PE=1 SV=2	444.754	9.88342
																MDH1	sp|P40925|MDHC_HUMAN	105_1	sp|P40925|MDHC_HUMAN	5.49057	NA	36403	EVGVYEALK;FVEGLPINDFSR	1;1	2	2	0.0629	7161;18600	-	Malate dehydrogenase, cytoplasmic OS=Homo sapiens OX=9606 GN=MDH1 PE=1 SV=4	1181.93	53.7242
																JUP	sp|P14923|PLAK_HUMAN	242_1	sp|P14923|PLAK_HUMAN	16.6479	NA	81692.7	ATIGLIR;EGLLAIFK;LLNDEDPVVVTK;LVQLLVK;VSVELTNSLFK	1;1;1;1;1	5	6	0.0604	724;3947;17396;17397;2036;14253	-	Junction plakoglobin OS=Homo sapiens OX=9606 GN=JUP PE=1 SV=3	805.536	18.3076
																HMGB1P1	sp|B2RPK0|HGB1A_HUMAN	317_1	sp|B2RPK0|HGB1A_HUMAN	7.22357	NA	24222.8	GEHPGLSIGDVAK;LGEMWNNTAADDK	1;1	2	2	0.1232	15673;20083	sp|P09429|HMGB1_HUMAN	Putative high mobility group protein B1-like 1 OS=Homo sapiens OX=9606 GN=HMGB1P1 PE=5 SV=1	578.909	52.6281
																ECI1	sp|P42126|ECI1_HUMAN	288_1	sp|P42126|ECI1_HUMAN	2.55024	NA	32795.2	AVQELWLR	1	1	1	0.0265	7346	-	Enoyl-CoA delta isomerase 1, mitochondrial OS=Homo sapiens OX=9606 GN=ECI1 PE=1 SV=1	154.151	11.0108
																PPA2	sp|Q9H2U2|IPYR2_HUMAN	166_1	sp|Q9H2U2|IPYR2_HUMAN	5.42377	NA	37896	LIAINANDPEASK;YVANIFPYK	1;1	2	2	0.0659	17756;10399	-	Inorganic pyrophosphatase 2, mitochondrial OS=Homo sapiens OX=9606 GN=PPA2 PE=1 SV=2	369.133	14.7653
																HDAC1	sp|Q13547|HDAC1_HUMAN	324_1	sp|Q13547|HDAC1_HUMAN	2.06169	NA	55067.7	YGEYFPGTGDLR	1	1	1	0.0249	18165	sp|Q92769|HDAC2_HUMAN	Histone deacetylase 1 OS=Homo sapiens OX=9606 GN=HDAC1 PE=1 SV=1	134.71	4.98926
																SCRN1	sp|Q12765|SCRN1_HUMAN	337_1	sp|Q12765|SCRN1_HUMAN	5.04121	NA	46352.5	DGLVVFGK;EPAAEIEALLGMDLVR	1;1	2	2	0.058	2556;23955	-	Secernin-1 OS=Homo sapiens OX=9606 GN=SCRN1 PE=1 SV=2	261.797	13.0899
																AK2	sp|P54819|KAD2_HUMAN	397_1	sp|P54819|KAD2_HUMAN	8.85516	NA	26460.8	AVLLGPPGAGK;LVSDEMVVELIEK	1;1	2	2	0.1004	6340;20848	-	Adenylate kinase 2, mitochondrial OS=Homo sapiens OX=9606 GN=AK2 PE=1 SV=2	290.052	17.0619
																PSMC5	sp|P62195|PRS8_HUMAN	465_1	sp|P62195|PRS8_HUMAN	2.22835	NA	45597.1	IEELQLIVNDK	1	1	1	0.0271	16631	-	26S proteasome regulatory subunit 8 OS=Homo sapiens OX=9606 GN=PSMC5 PE=1 SV=1	195.311	6.97538
																TCP1	sp|P17987|TCPA_HUMAN	416_1	sp|P17987|TCPA_HUMAN	5.41065	NA	60305.6	EQLAIAEFAR;YINENLIVNTDELGR	1;1	2	2	0.045	11455;24291	-	T-complex protein 1 subunit alpha OS=Homo sapiens OX=9606 GN=TCP1 PE=1 SV=1	349.686	9.99102
																PSMA5	sp|P28066|PSA5_HUMAN	284_1	sp|P28066|PSA5_HUMAN	5.20493	NA	26394.2	GVNTFSPEGR;SSLIILK	1;1	2	2	0.0705	8812;1259	-	Proteasome subunit alpha type-5 OS=Homo sapiens OX=9606 GN=PSMA5 PE=1 SV=3	740.832	67.3484
																ZYX	sp|Q15942|ZYX_HUMAN	463_1	sp|Q15942|ZYX_HUMAN	4.42758	NA	61238.2	EVEELEQLTQQLMQDMEHPQR	1	1	1	0.0367	27915	-	Zyxin OS=Homo sapiens OX=9606 GN=ZYX PE=1 SV=1	14.6381	0.697051
																VDAC3	sp|Q9Y277|VDAC3_HUMAN	461_1	sp|Q9Y277|VDAC3_HUMAN	4.42758	NA	30639.3	LTLSALIDGK	1	1	1	0.0353	7850	-	Voltage-dependent anion-selective channel protein 3 OS=Homo sapiens OX=9606 GN=VDAC3 PE=1 SV=1	142.711	7.92838
																GLOD4	sp|Q9HC38|GLOD4_HUMAN	414_1	sp|Q9HC38|GLOD4_HUMAN	2.28287	NA	34771.3	SLPQSDPVLK	1	1	1	0.0319	9436	-	Glyoxalase domain-containing protein 4 OS=Homo sapiens OX=9606 GN=GLOD4 PE=1 SV=1	802.937	36.4971
																VDAC1	sp|P21796|VDAC1_HUMAN	142_1	sp|P21796|VDAC1_HUMAN	11.3185	NA	30753.6	GYGFGLIK;LTFDSSFSPNTGK;WTEYGLTFTEK	1;1;1	3	3	0.1131	3034;18715;18164	-	Voltage-dependent anion-selective channel protein 1 OS=Homo sapiens OX=9606 GN=VDAC1 PE=1 SV=2	979.13	54.3961
																COPA	sp|P53621|COPA_HUMAN	101_1	sp|P53621|COPA_HUMAN	4.70218	NA	138258	QELILSNSEDK;VWDISGLR	1;1	2	2	0.0155	15529;5376	-	Coatomer subunit alpha OS=Homo sapiens OX=9606 GN=COPA PE=1 SV=2	524.842	6.90582
																PSMD11	sp|O00231|PSD11_HUMAN	412_1	sp|O00231|PSD11_HUMAN	5.58369	NA	47434	LYDNLLEQNLIR;TGQAAELGGLLK	1;1	2	2	0.0569	20850;11774	-	26S proteasome non-ATPase regulatory subunit 11 OS=Homo sapiens OX=9606 GN=PSMD11 PE=1 SV=3	360.413	11.2629
																PGLS	sp|O95336|6PGL_HUMAN	561_1	sp|O95336|6PGL_HUMAN	2.02446	NA	27529.6	LLTVPFEK	1	1	1	0.031	5414	-	6-phosphogluconolactonase OS=Homo sapiens OX=9606 GN=PGLS PE=1 SV=2	623.073	44.5052
																PCK2	sp|Q16822|PCKGM_HUMAN	39_1	sp|Q16822|PCKGM_HUMAN	4.42758	NA	70653.6	EVLAELEALER	1	1	1	0.0172	15425	-	Phosphoenolpyruvate carboxykinase [GTP], mitochondrial OS=Homo sapiens OX=9606 GN=PCK2 PE=1 SV=4	163.978	4.20457
																APRT	sp|P07741|APT_HUMAN	418_1	sp|P07741|APT_HUMAN	2.9996	NA	19595.4	IDYIAGLDSR	1	1	1	0.0556	10673	-	Adenine phosphoribosyltransferase OS=Homo sapiens OX=9606 GN=APRT PE=1 SV=2	614.334	43.881
																LASP1	sp|Q14847|LASP1_HUMAN	163_1	sp|Q14847|LASP1_HUMAN	8.85516	NA	29698.2	GFSVVADTPELQR;TGDTGMLPANYVEAI	1;1	2	2	0.1073	19133;21698	-	LIM and SH3 domain protein 1 OS=Homo sapiens OX=9606 GN=LASP1 PE=1 SV=2	680.976	42.561
																PSMD2	sp|Q13200|PSMD2_HUMAN	326_1	sp|Q13200|PSMD2_HUMAN	4.42758	NA	100136	EPLLTLVK	1	1	1	0.0088	4475	-	26S proteasome non-ATPase regulatory subunit 2 OS=Homo sapiens OX=9606 GN=PSMD2 PE=1 SV=3	77.9619	1.39218
																UBE2V1	sp|Q13404|UB2V1_HUMAN	333_1	sp|Q13404|UB2V1_HUMAN	8.85516	NA	16484.3	LLEELEEGQK;WTGMIIGPPR	1;1	2	2	0.1361	12715;10838	sp|Q15819|UB2V2_HUMAN	Ubiquitin-conjugating enzyme E2 variant 1 OS=Homo sapiens OX=9606 GN=UBE2V1 PE=1 SV=2	665.158	55.4298
																RPL11	sp|P62913|RL11_HUMAN	144_1	sp|P62913|RL11_HUMAN	4.42758	NA	20239.6	YDGIILPGK	1	1	1	0.0506	6218	-	60S ribosomal protein L11 OS=Homo sapiens OX=9606 GN=RPL11 PE=1 SV=2	625.608	69.512
																DPY19L2	sp|Q6NUT2|D19L2_HUMAN	331_1	sp|Q6NUT2|D19L2_HUMAN	4.42758	NA	87316.5	RPFIALCLSNVAFMLPWQFAQFILFTQIASLFPMYVVGYIEPSKFQK	1	1	1	0.062	28498	sp|Q6ZN68|D19P2_HUMAN	Probable C-mannosyltransferase DPY19L2 OS=Homo sapiens OX=9606 GN=DPY19L2 PE=1 SV=2	8.14063	0.23943
																DECR1	sp|Q16698|DECR_HUMAN	286_1	sp|Q16698|DECR_HUMAN	8.98285	NA	36044.8	EQWDTIEELIR;FNVIQPGPIK;SLAAEWGK	1;1;1	3	3	0.0866	19440;10352;3219	-	2,4-dienoyl-CoA reductase, mitochondrial OS=Homo sapiens OX=9606 GN=DECR1 PE=1 SV=1	621.775	28.2625
																RPS3A	sp|P61247|RS3A_HUMAN	161_1	sp|P61247|RS3A_HUMAN	11.2181	NA	29925.7	LFCVGFTK;TTDGYLLR;VVDPFSK	1;1;1	3	3	0.0871	6069;5198;1606	-	40S ribosomal protein S3a OS=Homo sapiens OX=9606 GN=RPS3A PE=1 SV=2	681.86	35.8874
																ALDH18A1	sp|P54886|P5CS_HUMAN	569_1	sp|P54886|P5CS_HUMAN	2.9996	NA	87247.5	GPVGLEGLLTTK	1	1	1	0.0151	12614	-	Delta-1-pyrroline-5-carboxylate synthase OS=Homo sapiens OX=9606 GN=ALDH18A1 PE=1 SV=2	224.639	4.88345
																FDPS	sp|P14324|FPPS_HUMAN	36_1	sp|P14324|FPPS_HUMAN	2.02446	NA	48244.6	ATPEQYQILK	1	1	1	0.0239	12817	-	Farnesyl pyrophosphate synthase OS=Homo sapiens OX=9606 GN=FDPS PE=1 SV=4	511.879	24.3752
																YWHAH	sp|Q04917|1433F_HUMAN	206_1	sp|Q04917|1433F_HUMAN	7.1053	NA	28201	AVTELNEPLSNEDR;DSTLIMQLLR;NLLSVAYK;NSVVEASEAAYK	1;0;0;1	2	2	0.1789	22241;13288;12779;13287;4369;15290	-	14-3-3 protein eta OS=Homo sapiens OX=9606 GN=YWHAH PE=1 SV=4	4306.91	239.273
																KIF27	sp|Q86VH2|KIF27_HUMAN	348_1	sp|Q86VH2|KIF27_HUMAN	2.88442	NA	160184	QLDAVIK	1	1	1	0.005	1511	-	Kinesin-like protein KIF27 OS=Homo sapiens OX=9606 GN=KIF27 PE=2 SV=1	812.552	9.23355
																MYL6	sp|P60660|MYL6_HUMAN	204_1	sp|P60660|MYL6_HUMAN	4.42758	NA	16919.1	DQGTYEDYVEGLR	1	1	1	0.0861	21576	-	Myosin light polypeptide 6 OS=Homo sapiens OX=9606 GN=MYL6 PE=1 SV=2	124.242	11.2947
																PSMA1	sp|P25786|PSA1_HUMAN	300_1	sp|P25786|PSA1_HUMAN	2.67772	NA	29536.9	LVSLIGSK	1	1	1	0.0304	2158	-	Proteasome subunit alpha type-1 OS=Homo sapiens OX=9606 GN=PSMA1 PE=1 SV=1	379.809	21.1005
																ARL6IP5	sp|O75915|PRAF3_HUMAN	246_1	sp|O75915|PRAF3_HUMAN	2.9996	NA	21600.4	TPMGIVLDALEQQEEGINR	1	1	1	0.1011	26610	-	PRA1 family protein 3 OS=Homo sapiens OX=9606 GN=ARL6IP5 PE=1 SV=1	16.4855	2.74759
																NPLOC4	sp|Q8TAT6|NPL4_HUMAN	534_1	sp|Q8TAT6|NPL4_HUMAN	2.06169	NA	68076.9	VGWIFTDLVSEDTR	1	1	1	0.023	22978	-	Nuclear protein localization protein 4 homolog OS=Homo sapiens OX=9606 GN=NPLOC4 PE=1 SV=3	25.6924	0.778557
																CDC37	sp|Q16543|CDC37_HUMAN	148_1	sp|Q16543|CDC37_HUMAN	4.42758	NA	44440	EGEEAGPGDPLLEAVPK	1	1	1	0.045	23760	-	Hsp90 co-chaperone Cdc37 OS=Homo sapiens OX=9606 GN=CDC37 PE=1 SV=1	214.48	11.2884
																PSMD3	sp|O43242|PSMD3_HUMAN	565_1	sp|O43242|PSMD3_HUMAN	12.5309	NA	60939.5	ALDLVAAK;EQQDLEFAK;FNQVLDQFGEK;LQLDSPEDAEFIVAK	1;1;1;1	4	4	0.0805	1788;10186;16940;23403	-	26S proteasome non-ATPase regulatory subunit 3 OS=Homo sapiens OX=9606 GN=PSMD3 PE=1 SV=2	2234.39	57.292
																RPN2	sp|P04844|RPN2_HUMAN	350_1	sp|P04844|RPN2_HUMAN	7.14975	NA	69241	SIVEEIEDLVAR;TGQEVVFVAEPDNK	1;1	2	2	0.0412	18135;21370	-	Dolichyl-diphosphooligosaccharide--protein glycosyltransferase subunit 2 OS=Homo sapiens OX=9606 GN=RPN2 PE=1 SV=3	279.647	11.1859
																RNH1	sp|P13489|RINI_HUMAN	167_1	sp|P13489|RINI_HUMAN	8.85516	NA	49941.1	ELSLAGNELGDEGAR;ELTVSNNDINEAGVR	1;1	2	2	0.0651	21312;22869	-	Ribonuclease inhibitor OS=Homo sapiens OX=9606 GN=RNH1 PE=1 SV=2	361.924	12.4801
																PLS3	sp|P13797|PLST_HUMAN	225_1	sp|P13797|PLST_HUMAN	15.5787	NA	70766.2	DGETLEELMK;QFVTPADVVSGNPK;VYALPEDLVEVKPK;YPALTKPENQDIDWTLLEGETR;YTLNVLEDLGDGQK	1;1;1;1;1	5	5	0.1175	11964;19959;22466;27883;21905	-	Plastin-3 OS=Homo sapiens OX=9606 GN=PLS3 PE=1 SV=4	425.044	10.6261
																LTA4H	sp|P09960|LKHA4_HUMAN	17_1	sp|P09960|LKHA4_HUMAN	5.22795	NA	69241.2	EDDLNSFNATDLK;LVVDLTDIDPDVAYSSVPYEK	1;1	2	2	0.0556	20433;21822	-	Leukotriene A-4 hydrolase OS=Homo sapiens OX=9606 GN=LTA4H PE=1 SV=2	383.173	10.0835
																MTHFD1	sp|P11586|C1TC_HUMAN	430_1	sp|P11586|C1TC_HUMAN	2.06169	NA	101495	TDTESELDLISR	1	1	1	0.0128	18269	-	C-1-tetrahydrofolate synthase, cytoplasmic OS=Homo sapiens OX=9606 GN=MTHFD1 PE=1 SV=3	208.241	3.71859
																RPS4X	sp|P62701|RS4X_HUMAN	77_1	sp|P62701|RS4X_HUMAN	13.5446	NA	29579.1	LIYDTK;LSNIFVIGK;VNDTIQIDLETGK;YALTGDEVK	1;1;1;1	4	6	0.1407	885;886;6697;19720;19721;6819	-	40S ribosomal protein S4, X isoform OS=Homo sapiens OX=9606 GN=RPS4X PE=1 SV=2	2237.01	111.851
																PGRMC1	sp|O00264|PGRC1_HUMAN	432_1	sp|O00264|PGRC1_HUMAN	2.88442	NA	21657.8	DFTPAELR	1	1	1	0.041	5466	-	Membrane-associated progesterone receptor component 1 OS=Homo sapiens OX=9606 GN=PGRMC1 PE=1 SV=3	503.268	50.3268
																GNPTAB	sp|Q3T906|GNPTA_HUMAN	340_1	sp|Q3T906|GNPTA_HUMAN	2.9996	NA	143531	FGFTSR	1	1	1	0.0048	246	-	N-acetylglucosamine-1-phosphotransferase subunits alpha/beta OS=Homo sapiens OX=9606 GN=GNPTAB PE=1 SV=1	216.144	2.92086
																LAMP1	sp|P11279|LAMP1_HUMAN	310_1	sp|P11279|LAMP1_HUMAN	4.42758	NA	44853.8	TVESITDIR	1	1	1	0.0216	7933	-	Lysosome-associated membrane glycoprotein 1 OS=Homo sapiens OX=9606 GN=LAMP1 PE=1 SV=3	746.512	37.3256
																ACACA	sp|Q13085|ACACA_HUMAN	53_1	sp|Q13085|ACACA_HUMAN	2.36299	NA	265385	MADHYVPVPGGPNNNNYANVELILDIAK	1	1	1	0.0119	28289	-	Acetyl-CoA carboxylase 1 OS=Homo sapiens OX=9606 GN=ACACA PE=1 SV=2	0	0
																RARS1	sp|P54136|SYRC_HUMAN	202_1	sp|P54136|SYRC_HUMAN	6.97782	NA	75330.9	IYDALDVSLIER;LFEFAGYDVLR	1;1	2	2	0.0348	18880;17073	-	Arginine--tRNA ligase, cytoplasmic OS=Homo sapiens OX=9606 GN=RARS1 PE=1 SV=2	305.048	7.44019
																CNTNAP4	sp|Q9C0A0|CNTP4_HUMAN	221_1	sp|Q9C0A0|CNTP4_HUMAN	4.42758	NA	145182	LISISGK	1	1	1	0.0054	318	-	Contactin-associated protein-like 4 OS=Homo sapiens OX=9606 GN=CNTNAP4 PE=1 SV=3	525.615	8.47766
																NOP56	sp|O00567|NOP56_HUMAN	15_1	sp|O00567|NOP56_HUMAN	2.26421	NA	66008.7	VLLGVGDPK	1	1	1	0.0152	4110	-	Nucleolar protein 56 OS=Homo sapiens OX=9606 GN=NOP56 PE=1 SV=4	469.253	13.0348
																PSME1	sp|Q06323|PSME1_HUMAN	32_1	sp|Q06323|PSME1_HUMAN	15.6166	NA	28705	APLDIPVPDPVK;EPALNEANLSNLK;ISELDAFLK;LMVMEIR;QLVHELDEAEYR	1;1;1;1;1	5	5	0.2129	15053;19003;7984;3958;20805	-	Proteasome activator complex subunit 1 OS=Homo sapiens OX=9606 GN=PSME1 PE=1 SV=1	1159	61
																ENO3	sp|P13929|ENOB_HUMAN	223_1	sp|P13929|ENOB_HUMAN	4.42758	NA	46957.3	AAVPSGASTGIYEALELR;SGETEDTFIADLVVGLCTGQIK;VNQIGSVTESIQACK	0;0;1	1	1	0.1267	24681;24680;27453;22916	-	Beta-enolase OS=Homo sapiens OX=9606 GN=ENO3 PE=1 SV=5	229.84	8.20859
																CSE1L	sp|P55060|XPO2_HUMAN	312_1	sp|P55060|XPO2_HUMAN	12.2098	NA	110346	AADEEAFEDNSEEYIR;LLQTDDEEEAGLLELLK;VIVPNMEFR;YIMIFR	1;1;1;1	4	4	0.0494	25315;25605;10099;2718	-	Exportin-2 OS=Homo sapiens OX=9606 GN=CSE1L PE=1 SV=3	455.102	8.12683
																PSMD1	sp|Q99460|PSMD1_HUMAN	34_1	sp|Q99460|PSMD1_HUMAN	8.85516	NA	105769	AAVESLGFILFR;DTSEDIEELVEPVAAHGPK	1;1	2	2	0.0325	16887;26249	-	26S proteasome non-ATPase regulatory subunit 1 OS=Homo sapiens OX=9606 GN=PSMD1 PE=1 SV=2	208.727	4.17453
																PFKP	sp|Q01813|PFKAP_HUMAN	200_1	sp|Q01813|PFKAP_HUMAN	8.01236	NA	85541.5	EWSGLLEELAR;NVIFQPVAELK;TFVLEVMGR	1;1;1	3	3	0.0395	16339;14965;8486	-	ATP-dependent 6-phosphofructokinase, platelet type OS=Homo sapiens OX=9606 GN=PFKP PE=1 SV=2	593.583	16.0428
																EIF4G1	sp|Q04637|IF4G1_HUMAN	532_1	sp|Q04637|IF4G1_HUMAN	2.72217	NA	175382	GVIDLIFEK	1	1	1	0.0056	7942	-	Eukaryotic translation initiation factor 4 gamma 1 OS=Homo sapiens OX=9606 GN=EIF4G1 PE=1 SV=4	47.7769	0.663568
																CUL4A	sp|Q13619|CUL4A_HUMAN	360_1	sp|Q13619|CUL4A_HUMAN	2.67772	NA	87624.4	TIDGILLLIER	1	1	1	0.0145	14905	sp|Q13620|CUL4B_HUMAN	Cullin-4A OS=Homo sapiens OX=9606 GN=CUL4A PE=1 SV=3	7.36806	0.131572
																CTNNA1	sp|P35221|CTNA1_HUMAN	135_1	sp|P35221|CTNA1_HUMAN	4.5398	NA	100009	NAGNEQDLGIQYK;QDLLAYLQR	1;1	2	2	0.0243	19794;10591	-	Catenin alpha-1 OS=Homo sapiens OX=9606 GN=CTNNA1 PE=1 SV=1	570.436	10.1864
																ADH5	sp|P11766|ADHX_HUMAN	434_1	sp|P11766|ADHX_HUMAN	2.9996	NA	39698.4	IDPLAPLDK	1	1	1	0.0241	6403	-	Alcohol dehydrogenase class-3 OS=Homo sapiens OX=9606 GN=ADH5 PE=1 SV=4	138.707	7.30036
																FLII	sp|Q13045|FLII_HUMAN	518_1	sp|Q13045|FLII_HUMAN	6.48927	NA	144659	FVFLLDR;GLDIYVWR	1;1	2	2	0.0118	4414;7566	-	Protein flightless-1 homolog OS=Homo sapiens OX=9606 GN=FLII PE=1 SV=2	125.907	1.85158
																RPL22	sp|P35268|RL22_HUMAN	261_1	sp|P35268|RL22_HUMAN	4.42758	NA	14777.8	AGNLGGGVVTIER	1	1	1	0.1016	14441	-	60S ribosomal protein L22 OS=Homo sapiens OX=9606 GN=RPL22 PE=1 SV=2	148.328	24.7214
																TRIM28	sp|Q13263|TIF1B_HUMAN	538_1	sp|Q13263|TIF1B_HUMAN	2.9996	NA	88493.4	ADVQSIIGLQR	1	1	1	0.0132	13087	-	Transcription intermediary factor 1-beta OS=Homo sapiens OX=9606 GN=TRIM28 PE=1 SV=5	246.435	7.70108
																ITGA3	sp|P26006|ITA3_HUMAN	314_1	sp|P26006|ITA3_HUMAN	8.85516	NA	116538	LELLLMDNLR;YTQVLWSGSEDQR	1;1	2	2	0.0219	14033;21969	-	Integrin alpha-3 OS=Homo sapiens OX=9606 GN=ITGA3 PE=1 SV=5	469.991	12.0511
																SOD1	sp|P00441|SODC_HUMAN	321_1	sp|P00441|SODC_HUMAN	4.42758	NA	15925.9	GDGPVQGIINFEQK	1	1	1	0.0909	20808	-	Superoxide dismutase [Cu-Zn] OS=Homo sapiens OX=9606 GN=SOD1 PE=1 SV=2	110.635	10.0577
																YBX2	sp|Q9Y2T7|YBOX2_HUMAN	514_1	sp|Q9Y2T7|YBOX2_HUMAN	4.42758	NA	38494.8	SVGDGETVEFDVVEGEK	1	1	1	0.0467	24608	sp|P16989|YBOX3_HUMAN;sp|P67809|YBOX1_HUMAN	Y-box-binding protein 2 OS=Homo sapiens OX=9606 GN=YBX2 PE=1 SV=2	54.6578	3.21516
																VARS1	sp|P26640|SYVC_HUMAN	364_1	sp|P26640|SYVC_HUMAN	9.95003	NA	140387	ALSPLEEWLR;AVLVALK;VPLEVQEADEAK	1;1;1	3	3	0.0229	13538;243;17024	-	Valine--tRNA ligase OS=Homo sapiens OX=9606 GN=VARS1 PE=1 SV=4	601.25	9.25
																VASP	sp|P50552|VASP_HUMAN	316_1	sp|P50552|VASP_HUMAN	4.42758	NA	39805.1	VKEEIIEAFVQELR	1	1	1	0.0368	23717	-	Vasodilator-stimulated phosphoprotein OS=Homo sapiens OX=9606 GN=VASP PE=1 SV=3	47.7757	2.81034
																IPO7	sp|O95373|IPO7_HUMAN	323_1	sp|O95373|IPO7_HUMAN	9.8905	NA	119440	ENIVEAIIHSPELIR;ETENDDLTNVIQK;EYNEFAEVFLK	1;1;1	3	3	0.0376	24017;21119;18487	-	Importin-7 OS=Homo sapiens OX=9606 GN=IPO7 PE=1 SV=1	221.011	4.91136
																NHLRC2	sp|Q8NBF2|NHLC2_HUMAN	131_1	sp|Q8NBF2|NHLC2_HUMAN	2.49097	NA	79393.5	MVSVLPIFR	1	1	1	0.0124	8785	-	NHL repeat-containing protein 2 OS=Homo sapiens OX=9606 GN=NHLRC2 PE=1 SV=1	49.2648	1.64216
																THEGL	sp|P0DJG4|THEGL_HUMAN	496_1	sp|P0DJG4|THEGL_HUMAN	2.88442	NA	52995.3	ILQLSVAK	1	1	1	0.0172	3477	-	Testicular haploid expressed gene protein-like OS=Homo sapiens OX=9606 GN=THEGL PE=2 SV=1	358.146	11.5531
																HDGF	sp|P51858|HDGF_HUMAN	334_1	sp|P51858|HDGF_HUMAN	6.8909	NA	26771.9	DLFPYEESK;GFSEGLWEIENNPTVK	1;1	2	2	0.1042	10824;24788	-	Hepatoma-derived growth factor OS=Homo sapiens OX=9606 GN=HDGF PE=1 SV=1	353.689	20.8053
																GNS	sp|P15586|GNS_HUMAN	325_1	sp|P15586|GNS_HUMAN	4.58152	NA	62042	AFQNVFAPR;SDVLVEYQGEGR	1;1	2	2	0.038	8418;17637	-	N-acetylglucosamine-6-sulfatase OS=Homo sapiens OX=9606 GN=GNS PE=1 SV=3	456.368	16.9025
																EIF4H	sp|Q15056|IF4H_HUMAN	366_1	sp|Q15056|IF4H_HUMAN	2.49097	NA	27368.4	GSNMDFR	1	1	1	0.0282	2338	-	Eukaryotic translation initiation factor 4H OS=Homo sapiens OX=9606 GN=EIF4H PE=1 SV=5	130.046	6.19268
																AP2A1	sp|O95782|AP2A1_HUMAN	57_1	sp|O95782|AP2A1_HUMAN	4.42758	NA	107478	GLAVFISDIR	1	1	1	0.0102	9671	sp|O94973|AP2A2_HUMAN	AP-2 complex subunit alpha-1 OS=Homo sapiens OX=9606 GN=AP2A1 PE=1 SV=3	159.298	2.65497
																YARS1	sp|P54577|SYYC_HUMAN	115_1	sp|P54577|SYYC_HUMAN	14.828	NA	59106.1	APWELLELR;EYTLDVYR;IFTFAEK;QVEPLDPPAGSAPGEHVFVK;SEFVILR	1;1;1;1;1	5	5	0.0966	10813;8660;3058;26426;3291	-	Tyrosine--tRNA ligase, cytoplasmic OS=Homo sapiens OX=9606 GN=YARS1 PE=1 SV=4	874.351	19.8716
																RNPEP	sp|Q9H4A4|AMPB_HUMAN	495_1	sp|Q9H4A4|AMPB_HUMAN	5.23028	NA	72549.5	AIEAVAISPWK;VDIIPGFEFDR	1;1	2	2	0.0338	12613;16492	-	Aminopeptidase B OS=Homo sapiens OX=9606 GN=RNPEP PE=1 SV=2	247.894	7.74669
																C1QBP	sp|Q07021|C1QBP_HUMAN	512_1	sp|Q07021|C1QBP_HUMAN	7.54795	NA	31342.6	AFVDFLSDEIK;VEEQEPELTSTPNFVVEVIK	1;1	2	2	0.1099	15767;27288	-	Complement component 1 Q subcomponent-binding protein, mitochondrial OS=Homo sapiens OX=9606 GN=C1QBP PE=1 SV=1	123.624	8.24159
																ACO2	sp|Q99798|ACON_HUMAN	493_1	sp|Q99798|ACON_HUMAN	14.2039	NA	85371.9	DLEDLQILIK;LEAPDADELPK;NAVTQEFGPVPDTAR;WVVIGDENYGEGSSR	1;1;1;1	4	4	0.0654	13091;13010;22484;23318	-	Aconitate hydratase, mitochondrial OS=Homo sapiens OX=9606 GN=ACO2 PE=1 SV=2	683.644	17.5293
																DNAJB11	sp|Q9UBS4|DJB11_HUMAN	266_1	sp|Q9UBS4|DJB11_HUMAN	2.28287	NA	40488.6	TLEVEIEPGVR	1	1	1	0.0307	14418	-	DnaJ homolog subfamily B member 11 OS=Homo sapiens OX=9606 GN=DNAJB11 PE=1 SV=1	190.188	8.64493
																MCM2	sp|P49736|MCM2_HUMAN	247_1	sp|P49736|MCM2_HUMAN	6.64687	NA	101832	ISHLPLVEELR;VAVGELTDEDVK	1;1	2	2	0.0254	16451;15503	-	DNA replication licensing factor MCM2 OS=Homo sapiens OX=9606 GN=MCM2 PE=1 SV=4	385.21	7.86144
																IPO5	sp|O00410|IPO5_HUMAN	268_1	sp|O00410|IPO5_HUMAN	4.42758	NA	123550	LVLEQVVTSIASVADTAEEK	1	1	1	0.0182	26565	-	Importin-5 OS=Homo sapiens OX=9606 GN=IPO5 PE=1 SV=4	7.16637	0.130298
																NT5E	sp|P21589|5NTD_HUMAN	11_1	sp|P21589|5NTD_HUMAN	2.9996	NA	63327.5	VLPVGDEVVGIVGYTSK	1	1	1	0.0296	24006	-	5'-nucleotidase OS=Homo sapiens OX=9606 GN=NT5E PE=1 SV=1	55.707	1.63844
																PARK7	sp|Q99497|PARK7_HUMAN	562_1	sp|Q99497|PARK7_HUMAN	4.42758	NA	19878.5	GAEEMETVIPVDVMR	1	1	1	0.0794	23416	-	Protein/nucleic acid deglycase DJ-1 OS=Homo sapiens OX=9606 GN=PARK7 PE=1 SV=2	149.457	11.4967

## Sheet: Analysis_table
gene_name	Unique_Peptide_Num_antisense	Unique_Peptide_Num_sense	iBAQ_antisense	iBAQ_sense	pos_col	iBAQ_antisense_log10	iBAQ_sense_log10	iBAQ_FC_sense_antisense
PRKDC	1	7	2.04155	4.31856	Both	1.08068	1.1559	1.74863
FH	1	3	42.8695	23.086	Both	1.72321	1.51964	0.549036
RPL12	1	1	55.6276	32.9349	Both	1.81709	1.63281	0.599265
MT-CO2	1	1	100.741	24.3274	Both	2.04431	1.53564	0.24894
PSMA6	1	4	25.1769	162.775	Both	1.54626	2.23748	6.25648
DCD	2	1	374.85	197.308	Both	2.58529	2.31662	0.527624
FASN	1	11	3.84689	18.5672	Both	1.14135	1.45587	4.03706
CLPX	1	0	10.8553	0	Antisense	1.31922	1	0.0843507
MAP1B	1	1	7.37291	0.444697	Both	1.23987	1.0189	0.172544
DDX5	2	3	32.7395	13.8181	Both	1.63083	1.37691	0.439193
VCP	4	14	93.7733	139.812	Both	2.01609	2.17555	1.48578
RPS7	1	1	40.4846	0.849518	Both	1.70316	1.03541	0.0445832
DBN1	1	6	31.3424	90.4207	Both	1.6164	2.00182	2.82665
HDLBP	1	0	6.07277	0	Antisense	1.20609	1	0.141387
NPEPPS	1	8	12.4588	25.4546	Both	1.35139	1.54967	1.96561
CCT5	1	1	22.9627	3.13513	Both	1.51802	1.11843	0.172565
ASNA1	1	0	29.0798	0	Antisense	1.59195	1	0.0332449
DLD	2	1	27.6625	1.93419	Both	1.57591	1.07679	0.10237
RPS16	2	1	142.785	15.6554	Both	2.18408	1.40918	0.115835
XRCC5	1	7	25.1126	40.0089	Both	1.54546	1.69905	1.57047
UBA1	2	7	14.2377	16.8177	Both	1.38449	1.42842	1.16932
ANXA2	17	22	3158.24	974.356	Both	3.50082	2.99315	0.308731
YWHAG	2	3	165.857	78.1644	Both	2.24516	1.94529	0.474446
CAP1	1	6	38.0422	68.8925	Both	1.68162	1.89704	1.79018
HBA1	1	0	36.3156	0	Antisense	1.66573	1	0.0267984
AKR1B10	1	2	37.9886	22.8245	Both	1.68114	1.5162	0.611063
ECH1	1	0	43.9717	0	Antisense	1.73217	1	0.0222362
YWHAB	1	3	28.8152	33.1558	Both	1.589	1.63504	1.14558
TPI1	3	6	56.0683	70.9285	Both	1.81999	1.9081	1.26039
RPL13A	1	1	86.9961	8.03287	Both	1.98675	1.25606	0.102651
XRCC6	1	7	22.3862	43.8972	Both	1.51036	1.73157	1.91981
YWHAE	3	8	161.914	176.187	Both	2.23531	2.26995	1.08762
ERP29	1	2	28.4006	11.686	Both	1.58434	1.33618	0.431486
SYNCRIP	4	7	110.418	52.7686	Both	2.08069	1.79774	0.482587
GDI1	1	2	26.8842	4.36285	Both	1.56684	1.15724	0.192325
TXNRD1	1	3	13.7962	11.9736	Both	1.37651	1.3419	0.87682
SERPINB12	3	0	104.43	0	Antisense	2.05854	1	0.00948496
RPL19	1	0	25.0717	0	Antisense	1.54496	1	0.0383557
PDIA3	8	12	312.295	96.5548	Both	2.50825	2.02757	0.311383
GPI	3	7	87.5847	82.2469	Both	1.98938	1.96495	0.939744
PRDX6	3	9	246.609	104.591	Both	2.40927	2.05915	0.426443
NONO	1	0	22.081	0	Antisense	1.50625	1	0.0433256
UBC	2	4	76.9346	42.0853	Both	1.93919	1.71672	0.552839
TALDO1	1	6	62.3356	119.043	Both	1.85935	2.11073	1.89535
CCT7	1	5	15.8912	18.4699	Both	1.41315	1.45439	1.15266
RPL3	1	0	50.7055	0	Antisense	1.78323	1	0.0193403
NCL	9	14	286.915	579.627	Both	2.47263	2.77058	2.01666
DHX9	13	15	156.69	67.1106	Both	2.22191	1.88711	0.431928
HNRNPA1L2	1	2	83.0314	36.1281	Both	1.96863	1.66397	0.441836
IGHG1	2	2	167.479	94.9006	Both	2.24915	2.02078	0.569214
ITGB1	3	7	101.226	106.858	Both	2.0462	2.06766	1.0551
CCT2	1	4	15.2111	19.6683	Both	1.40159	1.47229	1.27494
PGD	1	1	48.2441	0.526052	Both	1.76525	1.02227	0.0309896
GOT1	2	5	96.8261	55.868	Both	2.02868	1.81867	0.581318
RPS6	1	2	110.704	60.9811	Both	2.08172	1.85114	0.554869
CANX	4	8	160.012	68.2824	Both	2.23048	1.89366	0.430293
KBTBD3	1	0	35.9691	0	Antisense	1.66247	1	0.0270497
CAPZA2	1	0	58.4971	0	Antisense	1.83567	1	0.0168075
HBD	2	2	149.358	50.8648	Both	2.20237	1.78437	0.344941
TUBA1C	4	0	942.172	0	Antisense	2.97872	1	0.00106025
TUBA4B	1	1	478.478	48.8503	Both	2.68885	1.76975	0.103968
RPL27A	1	0	132.212	0	Antisense	2.15294	1	0.00750683
NACA	1	2	12.2461	7.05482	Both	1.34725	1.23185	0.608092
EZR	5	5	162.593	26.4574	Both	2.23702	1.56179	0.16784
BLMH	2	1	38.4412	8.14274	Both	1.68521	1.2587	0.231807
RUVBL1	1	3	18.3278	18.404	Both	1.45221	1.45338	1.00395
GSTO1	1	4	24.806	44.8981	Both	1.54165	1.73956	1.77858
TGM3	1	0	9.66713	0	Antisense	1.29374	1	0.093746
IARS2	1	3	33.0816	11.6311	Both	1.63429	1.33508	0.370614
EIF6	1	0	73.7214	0	Antisense	1.92284	1	0.013383
HNRNPAB	2	1	16.646	0	Both	1.42563	1	0.05667
TAGLN2	3	6	192.22	97.8619	Both	2.30582	2.03287	0.511656
PSME2	1	0	31.5012	0	Antisense	1.61806	1	0.0307681
PEBP1	1	2	90.7222	50.2873	Both	2.00313	1.78023	0.559158
ELAVL1	2	1	31.7712	9.7073	Both	1.62088	1.29463	0.326729
CLIC1	2	7	220.068	110.436	Both	2.36186	2.08075	0.504078
LMNA	7	17	156.87	140.751	Both	2.22238	2.17826	0.897899
APEX1	2	2	75.1384	25.4773	Both	1.93013	1.54995	0.347752
RPSA	1	4	71.7212	130.65	Both	1.91233	2.14814	1.81034
HSPA4	1	9	16.5339	31.4007	Both	1.4238	1.61701	1.84788
CORO1C	1	0	19.5219	0	Antisense	1.47014	1	0.0487285
AKR1C3	1	2	62.9393	48.6304	Both	1.86296	1.76812	0.776211
SLC25A3	2	5	110.521	66.3703	Both	2.08106	1.88292	0.604105
CFL1	2	6	15.2442	328.146	Both	1.40216	2.5291	20.2624
RPL7A	2	1	62.4989	39.7042	Both	1.86033	1.69639	0.641022
ACTC1	1	1	882.596	66.3255	Both	2.95065	1.88267	0.0761949
DDX39A	1	2	46.9436	24.9328	Both	1.75545	1.54323	0.540901
ACTB	4	0	3205.62	0	Antisense	3.50727	1	0.000311855
CCT8	3	9	86.7681	82.1736	Both	1.98573	1.96461	0.947651
GAPDH	5	9	508.437	237.234	Both	2.7147	2.39311	0.467642
EEF1D	3	6	120.287	113.784	Both	2.1149	2.09267	0.946388
SHROOM3	1	0	0.113629	0	Antisense	1.00491	1	0.897965
DDX21	1	4	8.5329	22.7645	Both	1.26794	1.5154	2.4929
NSUN2	1	1	18.6396	2.27556	Both	1.45697	1.08904	0.166783
VDAC2	1	4	95.6911	84.0633	Both	2.02404	1.97342	0.879742
PA2G4	1	3	17.7735	43.9303	Both	1.44363	1.73183	2.39328
DDB1	3	4	51.7421	17.4418	Both	1.79058	1.43841	0.349659
SSBP1	2	2	90.9685	49.5987	Both	2.00419	1.77524	0.550174
RPL26L1	1	2	140.345	110.98	Both	2.17709	2.08271	0.792241
ATP5F1A	5	13	249.682	165.883	Both	2.41444	2.24522	0.665717
CKM	1	1	101.785	6.25934	Both	2.04838	1.2111	0.0706265
MYL12B	1	3	62.6183	63.4234	Both	1.86105	1.86583	1.01265
OLA1	1	1	13.9981	4.43709	Both	1.38018	1.15948	0.362518
ANXA1	7	14	856.551	267.567	Both	2.93779	2.44337	0.313179
KRT10	21	28	8955.19	5287.02	Both	3.95256	3.72403	0.590432
KRT16	4	6	70.9736	132.115	Both	1.90834	2.15264	1.8495
KRT14	2	8	64.2034	113.361	Both	1.87042	2.09118	1.75392
KRT18	7	6	271.504	198.536	Both	2.44948	2.31918	0.732231
KRT17	1	2	10.2652	16.2161	Both	1.30675	1.41857	1.52825
KRT19	1	2	275.457	19.9761	Both	2.45554	1.47678	0.075875
PRDX1	5	5	606.137	423.687	Both	2.78968	2.63718	0.699492
CASP14	2	1	54.9967	7.80871	Both	1.81289	1.25063	0.157308
ACTN1	1	6	14.235	33.4529	Both	1.38444	1.63802	2.26143
ACTN4	8	14	117.97	49.8664	Both	2.10711	1.77718	0.427556
KRT78	1	1	14.1328	7.55111	Both	1.38261	1.2443	0.56507
SHTN1	1	0	18.517	0	Antisense	1.4551	1	0.0512374
YWHAQ	2	3	49.4689	12.3944	Both	1.77429	1.35014	0.265398
YWHAZ	3	5	233.171	122.882	Both	2.38591	2.12347	0.529025
PPP2R1A	1	4	37.5285	28.7088	Both	1.67695	1.58781	0.771085
SFPQ	1	1	2.60951	1.63722	Both	1.1007	1.06585	0.730631
H1-3	3	2	796.151	192.84	Both	2.90642	2.30715	0.243166
ARHGDIA	1	2	116.107	39.121	Both	2.10074	1.69127	0.342601
ARF3	1	5	96.8939	122.126	Both	2.02895	2.12099	1.25775
PSAT1	2	3	52.7992	28.0226	Both	1.79795	1.58004	0.539462
PPIA	3	6	751.031	145.519	Both	2.8814	2.19178	0.194831
GLRX3	1	1	25.192	8.7528	Both	1.54644	1.27307	0.372358
NME8	1	0	26.2756	0	Antisense	1.55961	1	0.0366628
BCAP31	1	2	62.5619	47.5769	Both	1.86071	1.76025	0.764245
GGCT	1	0	60.6478	0	Antisense	1.8491	1	0.0162212
PUF60	2	1	29.3967	13.7803	Both	1.59546	1.37622	0.486247
ACAA2	2	2	46.0285	4.97148	Both	1.74841	1.17526	0.126976
ANXA4	3	6	115.078	85.7804	Both	2.09718	1.98128	0.747606
PYGB	4	14	105.35	74.5248	Both	2.06202	1.92698	0.710154
HSPH1	3	6	31.2593	31.318	Both	1.61552	1.61614	1.00182
PCBP2	1	1	30.0702	20.0679	Both	1.60282	1.4781	0.678074
RTN4	1	2	45.2888	26.1966	Both	1.74264	1.55867	0.587542
FLNA	33	70	401.74	208.142	Both	2.61462	2.33874	0.519297
SPTBN1	1	14	12.5612	18.4694	Both	1.35336	1.45438	1.43567
GSR	1	3	11.9247	56.8631	Both	1.34093	1.82519	4.47692
EPRS1	1	1	36.8957	5.71342	Both	1.67113	1.19627	0.177155
FLNB	28	45	283.396	144.776	Both	2.46745	2.1897	0.51258
PLEC	4	3	4.55553	2.37815	Both	1.16303	1.09266	0.60807
MADD	1	0	6.23098	0	Antisense	1.21034	1	0.138294
HSPD1	7	11	237.341	148.478	Both	2.3933	2.19997	0.627162
CTTN	3	3	65.5091	38.9082	Both	1.878	1.68938	0.600041
PLIN3	1	0	20.6991	0	Antisense	1.48713	1	0.0460849
ANXA5	2	9	193.066	174.722	Both	2.30764	2.26652	0.905476
TXN	2	1	161.167	18.2768	Both	2.23342	1.45143	0.11887
EEF1B2	2	4	140.83	95.3667	Both	2.17849	2.0227	0.679452
HNRNPH3	1	1	51.8864	18.2413	Both	1.7916	1.45088	0.363823
ILF2	1	3	41.8635	86.2594	Both	1.71486	1.98344	2.03575
HNRNPDL	1	1	17.3756	15.4227	Both	1.43736	1.40522	0.893727
RPS9	1	3	43.8493	114.005	Both	1.73118	2.09344	2.56425
PGK1	5	12	387.815	239.127	Both	2.59968	2.39642	0.617586
HSPA9	6	13	156.201	118.244	Both	2.22063	2.10804	0.758541
HSPA1L	1	1	11.9099	16.1125	Both	1.34064	1.41685	1.32553
HSPA1A	7	8	132.762	131.143	Both	2.15461	2.14966	0.987902
HSPA5	13	21	668.961	318.944	Both	2.83184	2.51712	0.477556
HSPA8	15	20	697.826	375.309	Both	2.84993	2.58581	0.538488
G6PD	4	12	144.891	93.5731	Both	2.19003	2.01525	0.648246
HNRNPH1	1	1	3.99827	5.01199	Both	1.14607	1.17644	1.20281
AHNAK	2	26	2.11922	55.8864	Both	1.08347	1.8188	18.2374
ATIC	2	4	37.2663	20.4364	Both	1.67455	1.48339	0.56019
RPL14	1	1	78.2863	9.79109	Both	1.94589	1.29647	0.136103
SPTAN1	6	19	71.01	27.0849	Both	1.90854	1.5692	0.390014
HNRNPF	1	2	5.5344	39.5999	Both	1.19129	1.69548	6.21326
RPL7	3	6	233.725	155.87	Both	2.3869	2.21977	0.668314
MYH9	14	47	230.911	97.9617	Both	2.38186	2.03327	0.426722
GDI2	4	5	162.372	35.7134	Both	2.23647	1.66004	0.224723
FBXL4	1	0	10.0147	0	Antisense	1.30135	1	0.0907876
POM121L2	1	0	23.1472	0	Antisense	1.52045	1	0.0414127
AIMP1	1	0	18.7622	0	Antisense	1.45882	1	0.0506016
ALDH2	2	1	93.8372	14.0982	Both	2.01635	1.38199	0.159201
GLUD1	2	6	33.3671	61.4228	Both	1.63716	1.85384	1.81635
RPS18	2	2	77.0285	32.9682	Both	1.93966	1.63315	0.435331
PHGDH	2	7	86.1945	74.2891	Both	1.98315	1.92577	0.863462
H3C1	1	1	416.177	21.2615	Both	2.62959	1.49501	0.0533623
PLS1	1	0	21.916	0	Antisense	1.50401	1	0.0436377
CDSN	1	0	59.503	0	Antisense	1.842	1	0.0165281
RAB15	1	1	84.3546	19.6602	Both	1.97476	1.47217	0.242051
GSN	1	4	31.8582	21.9815	Both	1.62178	1.5049	0.699415
NIBAN2	1	6	30.3721	37.0979	Both	1.60608	1.673	1.21439
ALDOA	3	8	193.54	283.4	Both	2.30865	2.46746	1.46191
LDHA	5	8	456.777	213.937	Both	2.66911	2.35013	0.469523
GOT2	2	1	52.0498	8.93214	Both	1.79274	1.2772	0.187223
TRA2B	1	0	146.943	0	Antisense	2.19574	1	0.00675934
SET	2	3	400.116	94.0607	Both	2.61291	2.01729	0.236991
EEF1A1	4	8	853.982	227.393	Both	2.9365	2.37547	0.267131
VIM	18	24	1631.45	1029.9	Both	3.21523	3.01699	0.631505
KRT2	20	22	1562.7	1545.58	Both	3.19665	3.19189	0.989051
HNRNPC	1	3	24.0747	99.6707	Both	1.53243	2.04009	4.01484
ATP8A2	1	0	25.9549	0	Antisense	1.55576	1	0.0370989
DSP	2	5	5.32616	3.8542	Both	1.18543	1.14158	0.767321
WDR1	3	8	50.8259	126.746	Both	1.78409	2.13592	2.46492
KRT72	1	0	16.6918	0	Antisense	1.42638	1	0.0565234
KRT77	3	1	100.937	2.65382	Both	2.04508	1.10222	0.0358438
KRT7	6	4	309.528	83.2854	Both	2.50451	1.96981	0.271426
KRT6A	2	2	36.3136	39.5488	Both	1.66571	1.69503	1.0867
KRT6B	3	0	90.178	0	Antisense	2.00077	1	0.0109676
KRT8	10	10	442.913	185.37	Both	2.65601	2.29086	0.419834
KRT5	9	11	308.243	307.401	Both	2.50276	2.50161	0.99728
DSG1	2	2	28.5524	15.9435	Both	1.58605	1.41403	0.573338
IGKV2D-26	2	2	4567.76	4410.82	Both	3.66065	3.6455	0.965648
LACTB2	1	1	27.8495	7.01696	Both	1.57806	1.23088	0.277889
EIF2S1	1	0	16.4065	0	Antisense	1.42171	1	0.0574497
HNRNPA2B1	3	4	175.38	185.273	Both	2.26806	2.29064	1.05609
GANAB	2	7	31.7592	23.4455	Both	1.62075	1.52434	0.746216
KHSRP	2	6	38.8416	51.3145	Both	1.68879	1.78756	1.31306
RAB11A	1	1	45.5368	6.30585	Both	1.74458	1.21234	0.156991
SYPL1	1	0	51.919	0	Antisense	1.79182	1	0.0188968
FLG2	1	0	0.987153	0	Antisense	1.04089	1	0.503232
SHMT1	1	0	18.3239	0	Antisense	1.45215	1	0.0517493
VCL	15	28	192.786	143.712	Both	2.30704	2.18671	0.746765
TKT	7	12	354.51	420.472	Both	2.56171	2.63395	1.18554
PRMT1	2	2	109.868	31.5037	Both	2.0787	1.61809	0.293175
SNRPN	1	0	7.44025	0	Antisense	1.24155	1	0.11848
EIF4A1	6	9	187.404	143.709	Both	2.29536	2.1867	0.768077
TMEM109	1	1	56.4416	26.5899	Both	1.82244	1.56336	0.480313
SLC25A5	1	2	47.4834	27.062	Both	1.75954	1.56893	0.578797
ARMC9	1	0	0.671098	0	Antisense	1.02821	1	0.598409
KLHL36	1	0	30.6862	0	Antisense	1.60945	1	0.0315595
RPL13	1	2	82.609	50.0969	Both	1.96665	1.77885	0.611142
SHMT2	1	6	25.5632	56.8688	Both	1.551	1.82522	2.17854
HSPB1	2	5	139.083	240.284	Both	2.17343	2.39843	1.72244
HNRNPM	3	1	15.5367	4.32406	Both	1.40716	1.15607	0.321955
LRPPRC	3	18	8.36401	50.5456	Both	1.26397	1.78208	5.50465
RAB2A	1	1	44.8337	19.622	Both	1.73905	1.47161	0.449931
PPIB	4	2	204.77	21.2175	Both	2.33197	1.4944	0.107972
PHB	1	7	8.83574	111.185	Both	1.27498	2.08345	11.4059
MCCC2	7	12	170.126	189.049	Both	2.25558	2.29896	1.11058
ANXA11	3	10	162.967	99.5274	Both	2.23796	2.03952	0.613097
ATP5F1B	3	13	155.75	130.239	Both	2.21945	2.14687	0.837251
KRT9	18	29	4880.95	1932.43	Both	3.68939	3.28835	0.396036
RTN3	1	0	23.322	0	Antisense	1.52273	1	0.041115
STRAP	5	3	169.344	59.8105	Both	2.25369	1.84392	0.356986
CCT3	1	4	8.82691	21.0265	Both	1.27478	1.49173	2.24145
NPM1	1	3	6.28713	127.418	Both	1.21184	2.13804	17.6226
UBE2NL	1	1	14.6956	18.7451	Both	1.39262	1.45856	1.258
RPS5	1	2	135.71	98.3745	Both	2.16349	2.03493	0.726902
PRDX3	2	4	194.997	66.7908	Both	2.31175	1.88531	0.345877
RPL8	1	1	38.4672	34.7685	Both	1.68545	1.65097	0.906284
PDIA4	1	6	11.4913	24.364	Both	1.33226	1.5361	2.03053
RPS4Y2	1	0	2.06277	0	Antisense	1.08145	1	0.326502
TRAP1	1	4	261.317	55.5301	Both	2.43348	1.81644	0.215503
PRMT5	1	0	8.70154	0	Antisense	1.27188	1	0.103076
H2AC4	1	1	432.6	206.574	Both	2.64601	2.33561	0.478722
SEPTIN2	1	2	20.5331	12.4151	Both	1.48477	1.35054	0.622998
SSB	1	6	1.47132	36.4734	Both	1.05961	1.6672	15.1633
ARPC3	1	1	86.0872	2.61374	Both	1.98267	1.10084	0.0414956
FSCN1	2	3	41.9003	28.9074	Both	1.71517	1.59003	0.697138
RPL27	1	2	128.004	86.6298	Both	2.13989	1.98511	0.679278
H4C1	1	1	219.401	138.883	Both	2.3606	2.17285	0.634676
MDH2	3	7	91.2499	115.301	Both	2.00539	2.09796	1.26072
HNRNPD	1	3	121.484	79.9661	Both	2.11887	1.95408	0.661032
PDIA6	2	6	62.684	34.7995	Both	1.86144	1.65127	0.562143
PHB2	1	5	24.4414	30.0933	Both	1.53708	1.60307	1.22215
RPL4	3	2	131.837	22.0882	Both	2.15179	1.50635	0.173809
DPYSL2	3	11	124.749	102.165	Both	2.12953	2.04986	0.820405
SERPINB1	1	2	37.0215	11.1588	Both	1.6723	1.32549	0.319787
CLTC	11	27	115.078	90.1182	Both	2.09718	2.00051	0.784976
H2BC12	1	3	1.02785	172.157	Both	1.04249	2.26045	85.3892
HRNR	4	0	3.55263	0	Antisense	1.13202	1	0.219653
RPS14	1	1	122.538	33.0462	Both	2.12234	1.63393	0.275592
DAZAP1	1	0	9.65688	0	Antisense	1.29351	1	0.0938361
RPS3	3	7	192.653	126.066	Both	2.30675	2.13375	0.656154
DIRAS2	1	1	114.618	120.865	Both	2.09558	2.11682	1.05403
HNRNPU	5	6	75.0233	64.1086	Both	1.92954	1.86987	0.856429
TUBB	9	3	1131.89	72.5262	Both	3.05762	1.91659	0.0649014
RPL18	1	3	108.078	96.2959	Both	2.07217	2.02652	0.891986
EEF1G	4	6	238.769	58.3766	Both	2.3958	1.83491	0.247641
CALR	1	5	80.7038	64.2134	Both	1.95763	1.87048	0.798169
DARS1	1	4	9.44731	23.8104	Both	1.28886	1.52905	2.37482
HNRNPUL1	1	0	15.5864	0	Antisense	1.40801	1	0.0602905
ARPC4	1	4	48.9552	94.5754	Both	1.77052	2.01943	1.91322
TPM1	4	3	269.561	39.863	Both	2.44648	1.69778	0.151031
CTSD	3	5	206.245	94.935	Both	2.33495	2.02092	0.462906
NME2	1	0	23.9028	0	Antisense	1.53024	1	0.0401561
EEF2	13	23	360.601	178.672	Both	2.56891	2.27571	0.496879
SERPINH1	3	7	130.812	69.7387	Both	2.14864	1.90167	0.536664
ILF3	1	3	12.8694	43.7143	Both	1.35925	1.73009	3.22396
NAP1L1	1	2	74.6072	21.683	Both	1.92741	1.50083	0.300012
MAP4	1	2	11.7582	15.1852	Both	1.33762	1.40115	1.26861
PABPC1	5	4	72.1889	53.6647	Both	1.91481	1.8039	0.746899
RPS2	1	5	61.6989	76.7594	Both	1.85551	1.93832	1.2402
TUBA4A	1	3	66.4394	25.0695	Both	1.88332	1.54493	0.386563
HSP90B1	6	16	155.483	122.361	Both	2.21875	2.12176	0.788334
RPL23A	1	0	117.568	0	Antisense	2.10574	1	0.00843395
HSP90AA1	8	13	522.619	184.599	Both	2.72642	2.28914	0.354454
HSP90AB1	7	14	678.853	181.007	Both	2.83813	2.28105	0.267715
HNRNPK	7	9	242.16	213.085	Both	2.40168	2.34847	0.880429
ANXA3	1	4	58.6127	46.5207	Both	1.8364	1.75221	0.797158
KRT1	24	27	6565.51	3980.2	Both	3.81793	3.60099	0.606289
SRSF3	1	0	116.194	0	Antisense	2.10104	1	0.00853287
FUS	1	1	31.1174	18.4051	Both	1.61403	1.4534	0.604193
RPS8	2	5	339.104	344.583	Both	2.54295	2.54972	1.01611
ENO1	6	9	586.025	235.586	Both	2.77526	2.3902	0.403026
G3BP1	1	0	43.6751	0	Antisense	1.72977	1	0.0223838
RPS24	1	0	111.965	0	Antisense	2.08624	1	0.00885229
GARS1	2	6	34.1454	37.5774	Both	1.64489	1.6774	1.09765
P4HB	4	12	135.954	83.8483	Both	2.16422	1.97243	0.619538
TARDBP	1	0	30.1139	0	Antisense	1.60329	1	0.03214
PCNA	1	5	41.1211	53.4675	Both	1.7086	1.80255	1.29312
RPLP0	2	5	95.9789	118.188	Both	2.02522	2.10785	1.22901
PKM	6	24	619.515	370.265	Both	2.79901	2.58009	0.598317
CTNNB1	1	0	4.89382	0	Antisense	1.17301	1	0.169669
SRSF1	1	2	79.5817	21.476	Both	1.95222	1.49798	0.278922
AKR1B1	3	4	156.792	105.739	Both	2.22217	2.06348	0.676452
HNRNPA3	1	0	15.98	0	Antisense	1.41464	1	0.058893
ALB	8	12	351.1	213.798	Both	2.55763	2.34986	0.610048
KANSL3	1	0	0.0588875	0	Antisense	1.00255	1	0.944387
TWF2	1	1	20.6256	15.4698	Both	1.48608	1.40602	0.761586
RPS25	2	0	166.075	0	Antisense	2.2457	1	0.00598535
PCBP1	1	1	30.9386	14.3675	Both	1.61213	1.38681	0.481159
USP14	1	0	25.0459	0	Antisense	1.54464	1	0.0383938
AHCY	2	7	120.097	69.9414	Both	2.11427	1.90277	0.585823
XP32	1	1	89.4284	17.3971	Both	1.99751	1.4377	0.203443
RACK1	3	5	147.468	97.0102	Both	2.19719	2.02943	0.660142
TWF1	1	0	15.1949	0	Antisense	1.40131	1	0.061748
ACTG1	0	8	0	1937.92	Sense	1	3.28957	1938.92
YWHAH	0	2	0	239.273	Sense	1	2.39668	240.273
RAN	0	3	0	186.633	Sense	1	2.29366	187.633
RPL31	0	1	0	178.634	Sense	1	2.27562	179.634
PFN1	0	4	0	129.697	Sense	1	2.14519	130.697
TUBA1A	0	5	0	115.934	Sense	1	2.10014	116.934
SRSF7	0	3	0	112.383	Sense	1	2.08772	113.383
RPS4X	0	4	0	111.851	Sense	1	2.08583	112.851
GAPDHS	0	1	0	94.2978	Sense	1	2.01828	95.2978
PRDX2	0	2	0	89.048	Sense	1	1.99585	90.048
NME1	0	2	0	87.9925	Sense	1	1.99119	88.9925
ANP32A	0	1	0	79.8386	Sense	1	1.95346	80.8386
CAV1	0	2	0	78.5362	Sense	1	1.94712	79.5362
ACTR3	0	7	0	78.0161	Sense	1	1.94456	79.0161
FAM49B	0	2	0	73.5757	Sense	1	1.92208	74.5757
RPL11	0	1	0	69.512	Sense	1	1.90043	70.512
TUBB4B	0	3	0	68.3938	Sense	1	1.89428	69.3938
SNX12	0	1	0	67.4022	Sense	1	1.88875	68.4022
PSMA5	0	2	0	67.3484	Sense	1	1.88845	68.3484
RPL6	0	4	0	65.8881	Sense	1	1.88017	66.8881
PRPF19	0	1	0	65.3268	Sense	1	1.87695	66.3268
IGHA1	0	1	0	64.9754	Sense	1	1.87492	65.9754
PSME1	0	5	0	61	Sense	1	1.85126	62
PSMD3	0	4	0	57.292	Sense	1	1.82796	58.292
TUFM	0	5	0	55.9336	Sense	1	1.81911	56.9336
UBE2V1	0	2	0	55.4298	Sense	1	1.81578	56.4298
CCT6A	0	5	0	55.0677	Sense	1	1.81337	56.0677
VDAC1	0	3	0	54.3961	Sense	1	1.80886	55.3961
ACTR2	0	3	0	53.7616	Sense	1	1.80456	54.7616
MDH1	0	2	0	53.7242	Sense	1	1.8043	54.7242
CACYBP	0	4	0	53.1109	Sense	1	1.8001	54.1109
HMGB1P1	0	2	0	52.6281	Sense	1	1.79677	53.6281
PPP1CA	0	3	0	52.3588	Sense	1	1.7949	53.3588
RBBP4	0	3	0	52.3502	Sense	1	1.79484	53.3502
ETFB	0	2	0	51.1431	Sense	1	1.78635	52.1431
XPNPEP3	0	1	0	51.0007	Sense	1	1.78534	52.0007
PGRMC1	0	1	0	50.3268	Sense	1	1.78051	51.3268
PTBP1	0	4	0	50.2117	Sense	1	1.77968	51.2117
UGDH	0	8	0	48.5246	Sense	1	1.76734	49.5246
CAPZB	0	2	0	48.4151	Sense	1	1.76653	49.4151
ESD	0	2	0	46.218	Sense	1	1.74988	47.218
EHD1	0	5	0	46.0569	Sense	1	1.74863	47.0569
DLST	0	2	0	44.8173	Sense	1	1.73892	45.8173
PGLS	0	1	0	44.5052	Sense	1	1.73644	45.5052
TTR	0	3	0	44.3534	Sense	1	1.73523	45.3534
APRT	0	1	0	43.881	Sense	1	1.73144	44.881
PPA1	0	5	0	43.484	Sense	1	1.72822	44.484
LASP1	0	2	0	42.561	Sense	1	1.72066	43.561
EML4	0	9	0	42.5311	Sense	1	1.72042	43.5311
ST13P4	0	2	0	41.3654	Sense	1	1.71067	42.3654
ABCE1	0	1	0	40.5795	Sense	1	1.70397	41.5795
SEPTIN9	0	3	0	40.2485	Sense	1	1.70112	41.2485
SLC25A6	0	1	0	40.0045	Sense	1	1.69901	41.0045
CPNE1	0	3	0	38.8841	Sense	1	1.68917	39.8841
CALU	0	3	0	38.6326	Sense	1	1.68693	39.6326
LAMP1	0	1	0	37.3256	Sense	1	1.6751	38.3256
VAT1	0	2	0	37.3043	Sense	1	1.6749	38.3043
AK1	0	1	0	37.1256	Sense	1	1.67326	38.1256
ANP32E	0	1	0	37.089	Sense	1	1.67292	38.089
GLOD4	0	1	0	36.4971	Sense	1	1.66743	37.4971
RPS3A	0	3	0	35.8874	Sense	1	1.66169	36.8874
KRT6C	0	2	0	35.7308	Sense	1	1.66021	36.7308
AARS1	0	10	0	35.4102	Sense	1	1.65715	36.4102
CAPNS1	0	2	0	35.252	Sense	1	1.65564	36.252
TFAP2D	0	1	0	33.8765	Sense	1	1.64223	34.8765
CORO1B	0	2	0	33.5963	Sense	1	1.63945	34.5963
RPLP2	0	2	0	33.1075	Sense	1	1.63455	34.1075
STIP1	0	3	0	32.0428	Sense	1	1.62369	33.0428
CBR1	0	2	0	30.9625	Sense	1	1.61239	31.9625
RUVBL2	0	3	0	30.022	Sense	1	1.6023	31.022
MAT2A	0	2	0	29.9744	Sense	1	1.60178	30.9744
RPL35A	0	1	0	29.9429	Sense	1	1.60144	30.9429
COTL1	0	1	0	29.8949	Sense	1	1.60092	30.8949
SERPINA1	0	3	0	29.7906	Sense	1	1.59978	30.7906
CNN3	0	1	0	29.6659	Sense	1	1.59842	30.6659
MCCC1	0	5	0	28.3671	Sense	1	1.58396	29.3671
DECR1	0	3	0	28.2625	Sense	1	1.58277	29.2625
IDH2	0	3	0	27.1333	Sense	1	1.56976	28.1333
ATP5F1C	0	1	0	26.9462	Sense	1	1.56757	27.9462
LGALS1	0	1	0	26.7783	Sense	1	1.56559	27.7783
RAB35	0	1	0	26.6771	Sense	1	1.5644	27.6771
SERPINB6	0	2	0	26.5909	Sense	1	1.56337	27.5909
NUDT5	0	2	0	26.5817	Sense	1	1.56326	27.5817
ARPC2	0	2	0	26.506	Sense	1	1.56236	27.506
NSFL1C	0	2	0	26.3653	Sense	1	1.56069	27.3653
OTUB1	0	1	0	25.8614	Sense	1	1.55463	26.8614
RPL22	0	1	0	24.7214	Sense	1	1.5406	25.7214
FDPS	0	1	0	24.3752	Sense	1	1.53625	25.3752
ACP1	0	1	0	24.1027	Sense	1	1.53279	25.1027
PRDX5	0	2	0	23.816	Sense	1	1.52912	24.816
EIF3H	0	1	0	23.7597	Sense	1	1.5284	24.7597
GNB1	0	1	0	23.566	Sense	1	1.5259	24.566
SLC1A5	0	2	0	23.3368	Sense	1	1.52292	24.3368
ARHGAP1	0	1	0	23.3215	Sense	1	1.52273	24.3215
ASPH	0	3	0	23.2665	Sense	1	1.52201	24.2665
RPS10P5	0	1	0	22.5397	Sense	1	1.51241	23.5397
TMED10	0	1	0	21.2693	Sense	1	1.49512	22.2693
PSMA1	0	1	0	21.1005	Sense	1	1.49277	22.1005
IDH1	0	2	0	21.0335	Sense	1	1.49183	22.0335
HDGF	0	2	0	20.8053	Sense	1	1.48862	21.8053
CAPN2	0	4	0	20.2189	Sense	1	1.48028	21.2189
ANXA7	0	1	0	20.1788	Sense	1	1.4797	21.1788
YARS1	0	5	0	19.8716	Sense	1	1.47526	20.8716
PGAM1	0	3	0	19.7733	Sense	1	1.47383	20.7733
LMNB2	0	3	0	19.5752	Sense	1	1.47093	20.5752
ARPC1B	0	2	0	19.5189	Sense	1	1.4701	20.5189
ETFA	0	2	0	19.4357	Sense	1	1.46887	20.4357
RPN1	0	3	0	19.2001	Sense	1	1.46538	20.2001
APMAP	0	2	0	19.1861	Sense	1	1.46518	20.1861
HADHB	0	2	0	18.7033	Sense	1	1.45793	19.7033
FUBP1	0	1	0	18.493	Sense	1	1.45474	19.493
JUP	0	5	0	18.3076	Sense	1	1.4519	19.3076
TPM3	0	2	0	18.1404	Sense	1	1.44933	19.1404
DNM2	0	2	0	17.9499	Sense	1	1.44638	18.9499
CD63	0	1	0	17.5893	Sense	1	1.44074	18.5893
ACO2	0	4	0	17.5293	Sense	1	1.4398	18.5293
SNRPB2	0	1	0	17.4429	Sense	1	1.43843	18.4429
PSMB1	0	1	0	17.4121	Sense	1	1.43794	18.4121
PNP	0	3	0	17.3088	Sense	1	1.4363	18.3088
AK2	0	2	0	17.0619	Sense	1	1.43236	18.0619
GNS	0	2	0	16.9025	Sense	1	1.42979	17.9025
GNA13	0	1	0	16.6503	Sense	1	1.4257	17.6503
PAICS	0	3	0	16.5981	Sense	1	1.42485	17.5981
IMPDH2	0	3	0	16.0613	Sense	1	1.416	17.0613
PFKP	0	3	0	16.0428	Sense	1	1.41569	17.0428
CNDP2	0	3	0	15.8729	Sense	1	1.41285	16.8729
SSR4	0	1	0	15.8337	Sense	1	1.41219	16.8337
SF3B3	0	3	0	15.7697	Sense	1	1.41111	16.7697
PDCD6IP	0	3	0	15.7526	Sense	1	1.41082	16.7526
TXNDC5	0	1	0	15.7283	Sense	1	1.41041	16.7283
CAPN1	0	2	0	15.5167	Sense	1	1.40682	16.5167
ALDH1A1	0	1	0	15.4702	Sense	1	1.40603	16.4702
MAPRE1	0	1	0	15.4434	Sense	1	1.40558	16.4434
MVP	0	4	0	15.3951	Sense	1	1.40475	16.3951
EIF5A2	0	1	0	15.3326	Sense	1	1.40368	16.3326
S100A9	0	1	0	15.2775	Sense	1	1.40273	16.2775
TMEM43	0	1	0	15.1296	Sense	1	1.40019	16.1296
ERP44	0	1	0	15.021	Sense	1	1.39831	16.021
RANBP17	0	1	0	14.7983	Sense	1	1.39442	15.7983
PPA2	0	2	0	14.7653	Sense	1	1.39384	15.7653
EIF3B	0	4	0	14.6696	Sense	1	1.39216	15.6696
TPM4	0	1	0	14.6532	Sense	1	1.39187	15.6532
CS	0	2	0	14.6206	Sense	1	1.3913	15.6206
PON2	0	1	0	14.548	Sense	1	1.39002	15.548
HADHA	0	3	0	14.3417	Sense	1	1.38635	15.3417
HNRNPUL2	0	1	0	14.1807	Sense	1	1.38347	15.1807
RPL15	0	1	0	14.1463	Sense	1	1.38285	15.1463
LAP3	0	3	0	13.5591	Sense	1	1.37216	14.5591
DSTN	0	1	0	13.4933	Sense	1	1.37094	14.4933
FARSB	0	1	0	13.4195	Sense	1	1.36958	14.4195
AP2B1	0	3	0	13.3925	Sense	1	1.36908	14.3925
CD44	0	2	0	13.3897	Sense	1	1.36902	14.3897
IQGAP1	0	5	0	13.3529	Sense	1	1.36834	14.3529
HSD17B12	0	1	0	13.212	Sense	1	1.36571	14.212
SCRN1	0	2	0	13.0899	Sense	1	1.36342	14.0899
LDHB	0	2	0	13.0787	Sense	1	1.36321	14.0787
SNX2	0	1	0	13.0785	Sense	1	1.36321	14.0785
NOP56	0	1	0	13.0348	Sense	1	1.36238	14.0348
BUB3	0	1	0	12.8214	Sense	1	1.35834	13.8214
GSPT1	0	2	0	12.5394	Sense	1	1.35294	13.5394
RNH1	0	2	0	12.4801	Sense	1	1.3518	13.4801
KPNA4	0	1	0	12.3509	Sense	1	1.3493	13.3509
SAR1B	0	1	0	12.3225	Sense	1	1.34874	13.3225
TES	0	1	0	12.2458	Sense	1	1.34725	13.2458
PURA	0	1	0	12.1866	Sense	1	1.34609	13.1866
ITGA3	0	2	0	12.0511	Sense	1	1.34343	13.0511
AZGP1	0	1	0	12.0402	Sense	1	1.34322	13.0402
IGKC	0	1	0	11.8107	Sense	1	1.33867	12.8107
AHCYL1	0	2	0	11.6284	Sense	1	1.33503	12.6284
THEGL	0	1	0	11.5531	Sense	1	1.33351	12.5531
HSPE1	0	1	0	11.5311	Sense	1	1.33307	12.5311
PARK7	0	1	0	11.4967	Sense	1	1.33237	12.4967
PDHA1	0	1	0	11.3119	Sense	1	1.32862	12.3119
MYL6	0	1	0	11.2947	Sense	1	1.32827	12.2947
CDC37	0	1	0	11.2884	Sense	1	1.32814	12.2884
PSMD11	0	2	0	11.2629	Sense	1	1.32762	12.2629
LMAN1	0	1	0	11.2543	Sense	1	1.32745	12.2543
VPS35	0	1	0	11.223	Sense	1	1.32681	12.223
RPN2	0	2	0	11.1859	Sense	1	1.32605	12.1859
SUCLG2	0	1	0	11.0732	Sense	1	1.32373	12.0732
HADH	0	1	0	11.0519	Sense	1	1.32329	12.0519
ECI1	0	1	0	11.0108	Sense	1	1.32244	12.0108
UBA2	0	1	0	10.9607	Sense	1	1.32141	11.9607
PLS3	0	5	0	10.6261	Sense	1	1.31442	11.6261
WARS1	0	2	0	10.596	Sense	1	1.31378	11.596
ATP2A2	0	5	0	10.5709	Sense	1	1.31325	11.5709
GPD2	0	1	0	10.5602	Sense	1	1.31303	11.5602
SDHA	0	1	0	10.5248	Sense	1	1.31228	11.5248
ANP32B	0	1	0	10.4741	Sense	1	1.3112	11.4741
PRKCSH	0	1	0	10.3832	Sense	1	1.30927	11.3832
EPHX1	0	1	0	10.3077	Sense	1	1.30766	11.3077
CTNNA1	0	2	0	10.1864	Sense	1	1.30506	11.1864
EIF3D	0	1	0	10.1004	Sense	1	1.3032	11.1004
LTA4H	0	2	0	10.0835	Sense	1	1.30284	11.0835
SOD1	0	1	0	10.0577	Sense	1	1.30228	11.0577
TCP1	0	2	0	9.99102	Sense	1	1.30083	10.991
PGM1	0	1	0	9.96057	Sense	1	1.30017	10.9606
LRRFIP1	0	1	0	9.88342	Sense	1	1.29849	10.8834
SLC9A3R1	0	1	0	9.78254	Sense	1	1.29628	10.7825
RTCB	0	1	0	9.60239	Sense	1	1.29231	10.6024
VARS1	0	3	0	9.25	Sense	1	1.28443	10.25
KIF27	0	1	0	9.23355	Sense	1	1.28406	10.2335
PRPF18	0	1	0	9.1218	Sense	1	1.28153	10.1218
KRT32	0	1	0	9.05208	Sense	1	1.27994	10.0521
DNAJB11	0	1	0	8.64493	Sense	1	1.27056	9.64493
HARS1	0	1	0	8.58744	Sense	1	1.26922	9.58744
IARS1	0	4	0	8.57198	Sense	1	1.26886	9.57198
HSP90AB4P	0	1	0	8.55907	Sense	1	1.26856	9.55907
ACLY	0	3	0	8.51754	Sense	1	1.26758	9.51754
CNTNAP4	0	1	0	8.47766	Sense	1	1.26665	9.47766
TPT1	0	1	0	8.41866	Sense	1	1.26526	9.41866
PSMC2	0	1	0	8.31924	Sense	1	1.26291	9.31924
KPNA6	0	1	0	8.27501	Sense	1	1.26186	9.27501
C1QBP	0	2	0	8.24159	Sense	1	1.26106	9.24159
TARS1	0	3	0	8.23699	Sense	1	1.26095	9.23699
CCT4	0	2	0	8.23122	Sense	1	1.26082	9.23122
ENO3	0	1	0	8.20859	Sense	1	1.26028	9.20859
LAMP2	0	1	0	8.16369	Sense	1	1.2592	9.16369
CSE1L	0	4	0	8.12683	Sense	1	1.25832	9.12683
EIF3J	0	1	0	8.11874	Sense	1	1.25813	9.11874
HLA-A	0	1	0	8.00099	Sense	1	1.2553	9.00099
KPNB1	0	3	0	7.95033	Sense	1	1.25407	8.95033
VDAC3	0	1	0	7.92838	Sense	1	1.25354	8.92838
MCM2	0	2	0	7.86144	Sense	1	1.25192	8.86144
SULT1A1	0	1	0	7.75845	Sense	1	1.2494	8.75845
PGM2	0	1	0	7.75244	Sense	1	1.24926	8.75244
RNPEP	0	2	0	7.74669	Sense	1	1.24912	8.74669
TRIM28	0	1	0	7.70108	Sense	1	1.248	8.70108
SEPSECS	0	1	0	7.68428	Sense	1	1.24759	8.68428
SARS1	0	1	0	7.66965	Sense	1	1.24723	8.66965
DEK	0	1	0	7.66803	Sense	1	1.24719	8.66803
ADK	0	1	0	7.48178	Sense	1	1.24259	8.48178
RARS1	0	2	0	7.44019	Sense	1	1.24155	8.44019
ADH5	0	1	0	7.30036	Sense	1	1.23806	8.30036
NCEH1	0	1	0	7.29186	Sense	1	1.23784	8.29186
RAD23B	0	1	0	7.14307	Sense	1	1.23409	8.14307
TNPO1	0	1	0	7.0899	Sense	1	1.23274	8.0899
DYNC1LI2	0	1	0	6.98601	Sense	1	1.23009	7.98601
PSMC5	0	1	0	6.97538	Sense	1	1.22982	7.97538
EIF3C	0	2	0	6.91183	Sense	1	1.22819	7.91183
COPA	0	2	0	6.90582	Sense	1	1.22804	7.90582
SRSF2	0	1	0	6.87418	Sense	1	1.22722	7.87418
RPL10	0	1	0	6.85662	Sense	1	1.22677	7.85662
BAG3	0	1	0	6.78452	Sense	1	1.22491	7.78452
HSPBP1	0	1	0	6.62615	Sense	1	1.22079	7.62615
LARS1	0	3	0	6.38699	Sense	1	1.2145	7.38699
RPS26	0	1	0	6.37009	Sense	1	1.21405	7.37009
EIF4H	0	1	0	6.19268	Sense	1	1.20932	7.19268
LONP1	0	2	0	6.17187	Sense	1	1.20876	7.17187
ACADVL	0	1	0	6.08344	Sense	1	1.20638	7.08344
RAB14	0	1	0	6.0519	Sense	1	1.20553	7.0519
ETF1	0	1	0	6.00878	Sense	1	1.20436	7.00878
GALK1	0	1	0	5.99098	Sense	1	1.20388	6.99098
CAND1	0	2	0	5.87087	Sense	1	1.2006	6.87087
ASNS	0	1	0	5.75194	Sense	1	1.19733	6.75194
NASP	0	1	0	5.72821	Sense	1	1.19668	6.72821
BAG2	0	1	0	5.55325	Sense	1	1.19182	6.55325
PPAT	0	1	0	5.4841	Sense	1	1.18989	6.4841
MSN	0	2	0	5.45826	Sense	1	1.18916	6.45826
RO60	0	1	0	5.21606	Sense	1	1.1823	6.21606
UGP2	0	2	0	5.18265	Sense	1	1.18135	6.18265
ILK	0	1	0	5.16318	Sense	1	1.18079	6.16318
FKBP10	0	1	0	5.15549	Sense	1	1.18057	6.15549
PACSIN2	0	1	0	5.14839	Sense	1	1.18037	6.14839
HDAC1	0	1	0	4.98926	Sense	1	1.17578	5.98926
CCDC6	0	1	0	4.92095	Sense	1	1.1738	5.92095
IPO7	0	3	0	4.91136	Sense	1	1.17352	5.91136
ALDH18A1	0	1	0	4.88345	Sense	1	1.1727	5.88345
DISC1	0	1	0	4.88262	Sense	1	1.17268	5.88262
MATR3	0	1	0	4.86169	Sense	1	1.17207	5.86169
UQCRC1	0	1	0	4.82629	Sense	1	1.17103	5.82629
APEH	0	1	0	4.53542	Sense	1	1.16243	5.53542
MCM6	0	1	0	4.36367	Sense	1	1.15727	5.36367
NMT2	0	1	0	4.35273	Sense	1	1.15693	5.35273
DYNC1H1	0	6	0	4.2344	Sense	1	1.15334	5.2344
TPP2	0	1	0	4.21124	Sense	1	1.15263	5.21124
PCK2	0	1	0	4.20457	Sense	1	1.15243	5.20457
GSS	0	1	0	4.1964	Sense	1	1.15218	5.1964
PSMD1	0	2	0	4.17453	Sense	1	1.15151	5.17453
BZW1	0	1	0	4.16576	Sense	1	1.15124	5.16576
CSDE1	0	1	0	4.13022	Sense	1	1.15015	5.13022
TMPO	0	1	0	4.129	Sense	1	1.15011	5.129
MYOF	0	4	0	4.12285	Sense	1	1.14992	5.12285
NUDCD1	0	1	0	4.00085	Sense	1	1.14615	5.00085
SIMC1	0	1	0	3.84	Sense	1	1.14114	4.84
CEP128	0	1	0	3.75625	Sense	1	1.1385	4.75625
TUBB3	0	1	0	3.73559	Sense	1	1.13785	4.73559
CKAP4	0	1	0	3.72336	Sense	1	1.13746	4.72336
MTHFD1	0	1	0	3.71859	Sense	1	1.13731	4.71859
ALDH9A1	0	1	0	3.70713	Sense	1	1.13695	4.70713
ADRM1	0	1	0	3.61445	Sense	1	1.134	4.61445
PSMA4	0	1	0	3.56214	Sense	1	1.13233	4.56214
GART	0	2	0	3.54165	Sense	1	1.13167	4.54165
ASAP1	0	1	0	3.49848	Sense	1	1.13028	4.49848
BROX	0	1	0	3.38242	Sense	1	1.12653	4.38242
YBX2	0	1	0	3.21516	Sense	1	1.12107	4.21516
ATP1A1	0	1	0	3.20566	Sense	1	1.12076	4.20566
SEPTIN11	0	1	0	3.15372	Sense	1	1.11905	4.15372
PSMD6	0	1	0	3.04076	Sense	1	1.1153	4.04076
RCN1	0	1	0	2.96072	Sense	1	1.11263	3.96072
HSD17B4	0	1	0	2.93046	Sense	1	1.11161	3.93046
EIF3A	0	2	0	2.92323	Sense	1	1.11137	3.92323
GNPTAB	0	1	0	2.92086	Sense	1	1.11129	3.92086
GFM2	0	1	0	2.88265	Sense	1	1.11001	3.88265
ITGAV	0	1	0	2.8565	Sense	1	1.10912	3.8565
KPRP	0	1	0	2.83566	Sense	1	1.10842	3.83566
SCFD1	0	1	0	2.82835	Sense	1	1.10817	3.82835
EIF3L	0	1	0	2.82195	Sense	1	1.10795	3.82195
VASP	0	1	0	2.81034	Sense	1	1.10756	3.81034
ARL6IP5	0	1	0	2.74759	Sense	1	1.10543	3.74759
NBAS	0	1	0	2.66128	Sense	1	1.10248	3.66128
AP2A1	0	1	0	2.65497	Sense	1	1.10226	3.65497
NIBAN1	0	1	0	2.59802	Sense	1	1.1003	3.59802
IDE	0	1	0	2.48608	Sense	1	1.09643	3.48608
ITGB4	0	2	0	2.31979	Sense	1	1.0906	3.31979
KIF2A	0	1	0	2.29372	Sense	1	1.08968	3.29372
NARS1	0	1	0	2.0687	Sense	1	1.08166	3.0687
ACTR1A	0	1	0	2.03697	Sense	1	1.08052	3.03697
PSMC1	0	2	0	2.02898	Sense	1	1.08023	3.02898
PICALM	0	1	0	1.98384	Sense	1	1.0786	2.98384
COPB1	0	1	0	1.95552	Sense	1	1.07757	2.95552
FLII	0	2	0	1.85158	Sense	1	1.07378	2.85158
SUPT16H	0	1	0	1.7743	Sense	1	1.07094	2.7743
APOA1	0	1	0	1.66073	Sense	1	1.06673	2.66073
NHLRC2	0	1	0	1.64216	Sense	1	1.06603	2.64216
NT5E	0	1	0	1.63844	Sense	1	1.06589	2.63844
TLN1	0	2	0	1.56267	Sense	1	1.06306	2.56267
MSH2	0	1	0	1.53338	Sense	1	1.06196	2.53338
NAA15	0	1	0	1.50891	Sense	1	1.06103	2.50891
PSMD2	0	1	0	1.39218	Sense	1	1.05661	2.39218
RAB10	0	1	0	1.38796	Sense	1	1.05645	2.38796
CAT	0	1	0	1.3767	Sense	1	1.05602	2.3767
DIAPH1	0	1	0	1.31877	Sense	1	1.0538	2.31877
DDX17	0	1	0	1.29508	Sense	1	1.05289	2.29508
ASPM	0	1	0	1.2418	Sense	1	1.05084	2.2418
FARP1	0	1	0	1.20315	Sense	1	1.04934	2.20315
QARS1	0	1	0	1.19297	Sense	1	1.04895	2.19297
TPR	0	1	0	1.02913	Sense	1	1.04254	2.02913
HEXB	0	1	0	1.02851	Sense	1	1.04252	2.02851
PCYOX1	0	1	0	1.00836	Sense	1	1.04172	2.00836
NEDD4L	0	1	0	0.904377	Sense	1	1.0376	1.90438
PPL	0	1	0	0.839353	Sense	1	1.035	1.83935
DDX3X	0	2	0	0.807056	Sense	1	1.03371	1.80706
NPLOC4	0	1	0	0.778557	Sense	1	1.03256	1.77856
XPO1	0	1	0	0.773951	Sense	1	1.03237	1.77395
ZYX	0	1	0	0.697051	Sense	1	1.02926	1.69705
EIF4G1	0	1	0	0.663568	Sense	1	1.0279	1.66357
API5	0	1	0	0.650939	Sense	1	1.02739	1.65094
EIF2AK2	0	1	0	0.5715	Sense	1	1.02414	1.5715
SNRNP200	0	1	0	0.498494	Sense	1	1.02113	1.49849
VTN	0	1	0	0.463526	Sense	1	1.01968	1.46353
DHX15	0	1	0	0.445031	Sense	1	1.01891	1.44503
NUMA1	0	1	0	0.424309	Sense	1	1.01805	1.42431
SH3KBP1	0	1	0	0.39203	Sense	1	1.0167	1.39203
RDX	0	1	0	0.244592	Sense	1	1.01049	1.24459
DPY19L2	0	1	0	0.23943	Sense	1	1.01028	1.23943
CDC42BPA	0	1	0	0.191398	Sense	1	1.00823	1.1914
CUL4A	0	1	0	0.131572	Sense	1	1.00568	1.13157
IPO5	0	1	0	0.130298	Sense	1	1.00562	1.1303
SRSF4	0	1	0	0	Sense	1	1	1
RANBP1	0	1	0	0	Sense	1	1	1
HSPA4L	0	1	0	0	Sense	1	1	1
ACACA	0	1	0	0	Sense	1	1	1
